# Supplementary material for: Multinational comparison of new antidepressant use in older adults: a cohort study
Source: PubMed Central journal article supplement — BMJ Open. 2019 May 14;9(5):e027663. doi: 10.1136/bmjopen-2018-027663 (PMC6530307; doi:10.1136/bmjopen-2018-027663), 2019-05-14
Supplement: bmjopen-2018-027663.draft_revisions.pdf [file bmjopen-2018-027663.draft_revisions.pdf]

# BMJ Open

BMJ Open is committed to open peer review. As part of this commitment we make the peer review history of every article we publish publicly available.

When an article is published we post the peer reviewers' comments and the authors' responses online. We also post the versions of the paper that were used during peer review. These are the versions that the peer review comments apply to.

The versions of the paper that follow are the versions that were submitted during the peer review process. They are not the versions of record or the final published versions. They should not be cited or distributed as the published version of this manuscript.

BMJ Open is an open access journal and the full, final, typeset and author-corrected version of record of the manuscript is available on our site with no access controls, subscription charges or pay-per-view fees (<http://bmjopen.bmj.com>).

If you have any questions on BMJ Open's open peer review process please email [info.bmjopen@bmj.com](mailto:info.bmjopen@bmj.com)

# BMJ Open

## Multinational Comparison of New Antidepressant Use in Older Adults

|                               |                                                                                                                                                                                                                                                                                                                                                                                                                                                                                                                                                                                                                                                                                                                                                                                                                                                                                                                                                                                                                                            |
|-------------------------------|--------------------------------------------------------------------------------------------------------------------------------------------------------------------------------------------------------------------------------------------------------------------------------------------------------------------------------------------------------------------------------------------------------------------------------------------------------------------------------------------------------------------------------------------------------------------------------------------------------------------------------------------------------------------------------------------------------------------------------------------------------------------------------------------------------------------------------------------------------------------------------------------------------------------------------------------------------------------------------------------------------------------------------------------|
| Journal:                      | <i>BMJ Open</i>                                                                                                                                                                                                                                                                                                                                                                                                                                                                                                                                                                                                                                                                                                                                                                                                                                                                                                                                                                                                                            |
| Manuscript ID                 | bmjopen-2018-027663                                                                                                                                                                                                                                                                                                                                                                                                                                                                                                                                                                                                                                                                                                                                                                                                                                                                                                                                                                                                                        |
| Article Type:                 | Research                                                                                                                                                                                                                                                                                                                                                                                                                                                                                                                                                                                                                                                                                                                                                                                                                                                                                                                                                                                                                                   |
| Date Submitted by the Author: | 07-Nov-2018                                                                                                                                                                                                                                                                                                                                                                                                                                                                                                                                                                                                                                                                                                                                                                                                                                                                                                                                                                                                                                |
| Complete List of Authors:     | Tamblyn, Robyn; McGill University, Department of Medicine and Department of Epidemiology and Biostatistics<br>Bates, David ; Brigham and Women's Hospital, Medicine<br>Buckeridge, David; McGill University, Epidemiology, Biostatistics, and Occupational Health; Agence de la Santé et des services Sociaux de Montréal, Direction de santé publique<br>Dixon, Will; University of Manchester, Arthritis Research UK Centre for Epidemiology<br>Forster, Alan; The Ottawa Hospital , Internal Medicine ; The Ottawa Hospital Research Institute, Clinical Epidemiology Program<br>Girard, Nadyne; McGill University, Clinical and Health Informatics Research Group<br>Haas, Jennifer; Brigham and Women's Hospital<br>Habib, Bettina; McGill University, Clinical and Health Informatics Research Group<br>Kurteva, Siyana; McGill University, Epidemiology, Biostatistics, and Occupational Health<br>Li, Jack; Taipei Medical University, Graduate Institute of Biomedical Informatics<br>Sheppard, Therese; University of Manchester |
| Keywords:                     | Antidepressants, Multinational comparison, Older adults, EPIDEMIOLOGY                                                                                                                                                                                                                                                                                                                                                                                                                                                                                                                                                                                                                                                                                                                                                                                                                                                                                                                                                                      |
|                               |                                                                                                                                                                                                                                                                                                                                                                                                                                                                                                                                                                                                                                                                                                                                                                                                                                                                                                                                                                                                                                            |

SCHOLARONE™  
Manuscripts

## Multinational Comparison of New Antidepressant Use in Older Adults

Robyn Tamblyn<sup>1,2,3</sup>, David W. Bates<sup>4</sup>, David L. Buckeridge<sup>1,3</sup>, William G. Dixon<sup>5</sup>, Alan J. Forster<sup>6</sup>, Nadyne Girard<sup>3</sup>, Jennifer S. Haas<sup>4</sup>, Bettina Habib<sup>3</sup>, Siyana Kurteva<sup>1</sup>, Jack Li<sup>7,8</sup>, Therese Sheppard<sup>5</sup>

<sup>1</sup>Department of Epidemiology, Biostatistics and Occupational Health, McGill University, 1020 Pine Avenue West, Montreal, QC H3A 1A2, Canada

<sup>2</sup>Department of Medicine, McGill University Health Center, 1001 Decarie Boulevard, Montreal, QC H4A 3J1, Canada

<sup>3</sup>Clinical and Health Informatics Research Group, McGill University, 1140 Pine Avenue West, Montreal, QC H3A 1A3, Canada.

<sup>4</sup>Brigham and Women's Hospital, 75 Francis Street, Boston, MA 02115, USA.

<sup>5</sup>Arthritis Research UK Centre for Epidemiology, Centre for Musculoskeletal Research, Manchester Academic Health Science Centre, The University of Manchester, 2nd Floor, Stopford Building, Oxford Road, Manchester M13 9PT, UK.

<sup>6</sup>The Ottawa Hospital, 501 Smyth Road, Ottawa, Ontario K1H 8L6, Canada.

<sup>7</sup>International Center for Health Information Technology (ICHIT), Taipei Medical University, Taipei, Taiwan

<sup>8</sup>Graduate Institute of Biomedical Informatics, College of Medical Science and Technology, Taipei Medical University, Taipei, Taiwan

### Corresponding Author

Robyn Tamblyn, BScN, MSc, PhD, FCAHS, CM

McGill University

1140 Pine Avenue West

Montreal, QC H3A 1A3

Tel. 514-934-1934 ext 32999

[robyn.tamblyn@mcgill.ca](mailto:robyn.tamblyn@mcgill.ca)

Word count: 3,934

## ABSTRACT

**Objectives:** We used an international pharmacosurveillance network to estimate the rate and characteristics of antidepressant use in older adults in countries with more conservative (UK) and liberal depression guidelines (Canada, USA).

**Setting:** Electronic health records and population-based administrative data from six jurisdictions in four countries (UK, Taiwan, USA, and Canada).

**Participants:** A historical cohort of older adults ( $\geq 65$ ) who had a new episode of antidepressant use between 2009-2014.

**Outcome Measures:** The age-standardized cumulative incidence of new episodes of antidepressant use in older adults was measured. Descriptive statistics were used to compare the proportion of new users by the antidepressant prescribed, therapeutic class, potential treatment indication, and country, as well as the characteristics of the first treatment episode (standardized daily doses, duration and changes).

**Results:** The incidence of antidepressant use between 2009-2014 varied from 0.7%(UK), to 18.6% (Taiwan). Tricyclic antidepressants (TCAs) were the most commonly used class in the UK (48.8%) and Taiwan (52.4%) compared to selective serotonin reuptake inhibitors (SSRIs) in North American jurisdictions (42.3%-53.3%). Chronic pain was the most common potential treatment indication (41.2%-68.2%). Among users with chronic pain, TCAs were used most frequently in the UK and Taiwan (55.2%-60.4%) whereas SSRIs were used most frequently in North America (33.5%-46.4%). Treatment was longer (252-525 vs 169-437 days), standardized doses were higher (0.7-1.3 vs 0.5-1.0), and treatment was more likely to be changed (31%-46% vs 21%-34%) among patients with depression (9.1%-43%) than those with chronic pain.

**Conclusion:** Antidepressant use in older adults varied 24-fold by country, being lowest in the UK, which has the most conservative treatment guidelines. Chronic pain was the most common potential treatment indication. Evaluation of real-world risks of TCAs is a priority for future research, given high rates of use, and the potential for increased toxicity in older adults because of potent anti-cholinergic effects.

### **Summary Boxes**

#### **What is already known on this topic**

- The use of antidepressants in older adults has been increasing in many countries.
- Antidepressant use in older adults is associated with fall-related injuries, functional decline, and mortality.
- Guidelines on depression management vary between countries, but it is not known how these differences impact the use of antidepressants among older adults.

#### **What this study adds**

- Our study shows that antidepressant use among older adults varies between countries and is lowest in England, which has the most conservative guidelines.
- The most common potential treatment indication in all studied countries was chronic pain.
- Antidepressant users with chronic pain in England and Taiwan most frequently used TCAs, whereas those in North America used SSRIs.

#### **Strengths of this study**

- Uses an international pharmacosurveillance network to characterize antidepressant use across multiple jurisdictions

#### **Limitations of this study**

- Despite data harmonization efforts, measurement and reporting issues may lead to arbitrary differences between regions and countries.
- Treatment indication is unknown for all but one study cohort. Documentation of health problems in medical services billing data and EMRs was used as a proxy for treatment indication for remaining cohorts, which could have resulted in misclassification bias.
- While some cohorts represented total populations or representative samples, others were assembled from practices supported by specific information technology systems.

## **INTRODUCTION**

Depression affects an estimated 300 million people worldwide[1]. In the past decade, many countries have reported a two to three fold increase in the use of antidepressant medications[2]. The primary increase has been in newer antidepressants such as selective serotonin reuptake inhibitors (SSRIs), which are considered to have better efficacy than older drugs, with fewer side effects[3]. Increasing prevalence of use of antidepressants has also been associated with both an increase in the number of people started on therapy as well as its duration, with 40% of antidepressants being prescribed for more than 180 days [4]. Antidepressants now represent one of the most commonly prescribed medications[5 6], especially among older adults, where the increase in use has been the greatest in the US population[5 7].

The increasing use of antidepressants in older adults may be due to a number of factors. There has been long-standing advocacy for better recognition and treatment of depression in older adults[8 9]. In addition, individuals with multiple chronic conditions are more likely to experience depression. In Canada, 12% of persons 65 years and older have two or more major chronic conditions compared to only 3.6% in younger adults; and 4% of adults with at least one major chronic disease have mood or anxiety disorders, which are other approved indications for antidepressant use[10]. While increasing prevalence of depression, anxiety and other mood disorders in older adults may account for increasing use of antidepressants, there is also evidence that antidepressants are prescribed for unapproved indications that may not be supported by scientific evidence of efficacy[11-14]. One recent study found that nearly 50% of antidepressants were prescribed for unapproved indications including chronic pain, tiredness, and sleep disturbance[11], which are also more common in older adults[15].

Taken together, these factors have led to increasing concern about overuse of antidepressants, particularly in older adults[16]. This concern is heightened because of the reported association between antidepressant use and fall-related injuries, motor vehicle accidents, functional decline, and mortality in older adults[17-19]. Clinical practice guidelines for the management of depression vary considerably in their recommendations for first line treatment[20-24], although most acknowledge the need to consider patient preferences (Table 1). The United Kingdom NICE guidelines are the most conservative, recommending first line treatment with psychotherapy such as cognitive behavioral therapy with pharmacotherapy added only if non-pharmacological therapy is unsuccessful[24]. At the other end of the spectrum, the Canadian 2016 guidelines recommend pharmacotherapy as the first line treatment; including selective serotonin re-uptake inhibitors (SSRIs), serotonin-norepinephrine reuptake inhibitors (SNRIs), mirtazapine, or bupropion for mild or moderate depressive disorder, with the addition of psychotherapy only if there is an inadequate antidepressant response[21]. Of note, Canada ranks as the 3<sup>rd</sup> highest user of anti-depressants among 23 OECD countries, surpassed only by Australia and Iceland[2].

However, few data are available regarding how national guidelines may contribute to differences in how antidepressants are used for older adults. We took advantage of an international pharmacosurveillance network[25] that uses electronic medical record (EMR) and population-based health administrative data to estimate the rate of antidepressant use in older adults in countries that had more conservative (UK) and lenient guidelines (Canada, USA, Taiwan). We evaluated differences in the choice of antidepressant, dose and duration of treatment, the prevalence of dose changes and switches in treatment of older adults

with new episodes of antidepressant use, as well as differences in treatment approach for patients with a recorded diagnosis of depression, other mental health co-morbidities, and chronic pain.

## **METHODS**

### **Study Design and Population**

To characterize antidepressant use in older adults, a prospective cohort of individuals who were 65 years of age or older and had a new episode of antidepressant use between 2009 and 2014 following two years during which they had no prescription or dispensation of an antidepressant was assembled. Eligible patients were identified from electronic medical record (EMR) or population-based registries in a total of six jurisdictions in four countries (Canada, United States, UK, and Taiwan).

### **Data Sources**

#### *CANADA*

Quebec EMR cohort: Data were extracted from the Medical Office of the 21<sup>st</sup> Century (MOXXI) EMR, which includes a real-time linkage to the Quebec insurance agency, the Régie de l'assurance maladie du Québec (RAMQ) databases. This linkage provides historical and daily updates of patients' received medical services (diagnosis, procedure, date, location, provider), prescriptions dispensed from community pharmacies for persons who are publicly insured (prescriber, pharmacy, drug, dose, dispensing date, duration, refills), and mortality. Approximately 110 primary care physicians in Quebec use MOXXI for approximately 90,000 of their patients, representing approximately 25% of the patients in the practice, and approximately 5% of the Quebec population in primary care practices.

Quebec Administrative Data cohort: Data were retrieved from the Montreal Population Health Record, a population-based 25% random sample of the 4.1 million residents of Montreal, Canada's second largest city, which is dynamically updated each year to account for in and out-migration. Beneficiary characteristics were measured by linking the RAMQ beneficiary database (age, sex, postal code) with Statistics Canada's census file (postal code level measures of socio-economic status), and the Institute of Statistics birth and death registry (date of birth and death). From this population-based dataset, we identified all non-institutionalized persons 65 years of age or older between 2009-2014. All medical services (date, diagnosis, procedure), hospitalizations (admission and discharge date, primary and secondary diagnoses, in-hospital procedures), and medications (prescriber, pharmacy, drug, dose, dispensing date, duration, refills) received by members of the cohort were retrieved from the RAMQ database and those of the Quebec Ministry of Health.

Ontario Administrative Data Cohort: Data were extracted from the Institute for Clinical Evaluative Sciences population-based repository of health records for the 13.6 million Ontario residents. The data is provided by the Ontario Ministry of Health and Long-Term Care, which pays for all essential health services. For the 2 million Ontario non-institutionalized residents who were 65 year or older between 2007 and 2014, we extracted age, sex and date of death from the beneficiary registrants database, all billing claims for medical services provided by Ontario physicians (date of service, diagnosis, procedure code, physician provider), all claims for medications dispensed in the community by Ontario pharmacies (drug, date

1  
2  
3 dispensed, prescriber, quantity, duration, number of refills), and data from discharge summaries of  
4 emergency department visits and hospital stays (date of admission and discharge, primary and secondary  
5 diagnoses and procedures).  
6

#### 7 8 *UNITED STATES*

9  
10 *Boston, Massachusetts EMR cohort:* Data were extracted from the Partners HealthCare Research Patient  
11 Data Registry (RPDR), which provides care for approximately 3 million of 5 million residents in Boston and  
12 surrounding areas. RPDR includes data from the Longitudinal Medical Record (LMR), an internally  
13 developed, web-based, fully functional EMR that was in use during this period for the participating  
14 primary care clinics from Brigham and Women's Hospital (BWH) and Massachusetts General Hospital  
15 (MGH), the two founding members of Partners Healthcare in Boston, Massachusetts. Data were retrieved  
16 from the structured clinical encounter information from RPDR for all outpatient primary care visits. To  
17 ensure complete follow-up, patients were eligible if they were seen in one of 37 BWH- or MGH- affiliated  
18 primary care or diabetes clinics.  
19  
20  
21

#### 22 *UNITED KINGDOM*

23  
24 *EMR cohort:* Data were extracted from the Clinical Practice Research Datalink (CPRD), an anonymised  
25 longitudinal medical records database for primary care. The primary care EHR includes information on all  
26 primary care interactions, including documented health problems, visit notes, prescriptions, and records  
27 of specialty referrals, as well as information on lab results, hospitalizations, and death. The CPRD includes  
28 more than 4 million active patients, 76% of whom are in England, representing 6.9% of the 64 million  
29 primary care population in the UK, and around 600 primary care practices[26]. Patients were included if  
30 their records met minimum quality standards and there were no gaps in registration.  
31  
32  
33

#### 34 *TAIWAN*

35  
36 *Administrative Data Cohort:* Data were extracted from the Taiwanese National Health Insurance (NHI)  
37 system databases. The NHI provides health coverage to around 99% of Taiwan's population of 23 million,  
38 providing comprehensive coverage for all health services, including dental, preventive, Western medicine,  
39 and traditional Chinese medicine services. A random sample of 103,400 of the 3.6 million residents that  
40 were 65 years or older in Taiwan between 2007 and 2014 was extracted for this study. The NHI's research  
41 databases include a registry for beneficiaries (e.g. registrant's age, sex, residence), an outpatient visit  
42 database (date and time of visit, ICD-9-CM codes of existing health problems, service provided), an  
43 inpatient visit database (date of hospitalization and discharge, ICD-9-CM codes of existing health  
44 problems, procedure codes and dates), and a pharmacy database (drug prescribed, date, duration,  
45 dosage, prescribing physician, dispensing pharmacy).  
46  
47  
48  
49  
50  
51  
52  
53  
54  
55  
56  
57  
58  
59  
60



## Measurement

### Patient Characteristics

*Age & Sex:* Date of birth and sex were retrieved from the administrative data in Canada and Taiwan as these data are verified at the time of enrollment in the health plan. For the US and United Kingdom, these data were retrieved from the EMR.

### Depression, Other Mental Health Comorbidities, and Chronic Pain

We measured the existence of potential indications for antidepressant use[11 12] including depression, other mental health conditions, and chronic pain. Depression included mild, moderate, major single or recurrent depressive disorder with or without psychotic symptoms, adjustment reaction, and mixed anxiety and depression. Other mental health conditions included anxiety, alcohol abuse, illicit drug use, attempted suicide, psychosis, schizophrenia, and bipolar disorder. Anxiety included dissociative and somatoform disorders. We used standard diagnostic codes (ICD 9, ICD 10, and Read codes) retrieved from the EMR, and/or medical services claims, and hospitalizations in the two-years prior to the first antidepressant prescription to measure these conditions (Appendix).

To measure chronic pain, we used a previously validated ICD9 and ICD10 code set for non-cancer pain[27]. The concepts and definitions used in the development and validation of this code set were used to map to Read codes (Appendix). Chronic non-cancer pain conditions included lumbar pain, back disorders that are often associated with pain (e.g. degenerative disc disease), neck and back problems (e.g. spondylosis), fibromyalgia, complex regional pain syndromes (e.g. mononeuritis), painful neuropathic disorders (e.g. post herpetic neuralgia), pain disorders with psychosocial dysfunction, and unclassified chronic pain problems.

### Characterizing Antidepressant Use

The characteristics of antidepressant use were compared in the population of seniors with a new episode of antidepressant use in each country, overall, and then within subgroups that had a diagnosis of a) depression, b) chronic pain, or c) other mental health problems.

*Classification of Starting Therapy:* The Anatomic Therapeutic Classification (ATC) system[28] was used to map national drug names and identification numbers to a common nomenclature based on the antidepressants that were prescribed during the study time period. Therapeutic classes included tri-cyclic antidepressants (TCAs), selective serotonin reuptake inhibitors (SSRIs), serotonin-norepinephrine reuptake inhibitors (SNRIs), serotonin antagonist and reuptake inhibitors (SARIs), norepinephrine-dopamine reuptake inhibitors (NDRIs), noradrenergic and specific serotonergic antidepressants (NaSSAs), tetracyclic antidepressants (TeCAs), melatonergic agonists (MAs), and norepinephrine reuptake inhibitors (NRIs). Monoamine oxidase inhibitors were excluded as they are rarely used and only for bipolar disorder. Starting therapy was classified by therapeutic class and drug, and by the number of antidepressants prescribed at treatment initiation.

*Starting Antidepressant Dose:* To enable comparisons in the dose prescribed among antidepressants, we created a standardized dose for each drug by dividing the prescribed dose by the WHO recommended

1  
2  
3 daily dose for adults. The resulting indicator represents the proportion of the recommended daily adult  
4 dose that was prescribed. When more than one antidepressant was prescribed concurrently, we summed  
5 the standardized dose for each drug.  
6  
7

### 8 9 **Analysis**

10 The cumulative incidence of older adults with new episodes of antidepressant use in the period 2009 to  
11 2014 was measured by dividing the number of new users by the total population that was 65 years or  
12 older during this time period. Rates were standardized for age using the direct method and the United  
13 Kingdom as the reference population. New episodes of use were defined as those who had no prior  
14 prescription of an antidepressant in the two years preceding their first prescription. Descriptive statistics  
15 were used to compare the proportion of new antidepressants users by the antidepressant prescribed,  
16 therapeutic class, country and potential treatment indication, as well as the characteristics of the first  
17 treatment episode. As the co-existence of other mental health conditions may modify treatment choices,  
18 we used the prevalence ratio to estimate the concurrence of other mental health problems, chronic pain  
19 and depression. The prevalence ratio allowed us to compare between countries even if the prevalence of  
20 these conditions is different[29].  
21  
22  
23  
24

### 25 **Patient and Public Involvement**

26 Patients and members of the public were not involved in the development of research questions or  
27 outcome measures, design, or implementation of this study. There are no plans to involve patients in  
28 dissemination of research results.  
29  
30

### 31 **RESULTS**

32 The age-standardized cumulative incidence of antidepressant use in persons aged 65 and older in the  
33 period 2009-2014 was highest in Taiwan (18.6%) and Ontario, Canada (15.3%), and lowest in England  
34 (0.7%) (Table 2). Similarly, the overall prevalence of antidepressant use in the same time period was lowest  
35 in England (10.3%), and highest in Ontario, Canada (26.8%) and Taiwan (23.4%) and. The distribution of  
36 age was similar in all jurisdictions.  
37  
38  
39  
40

#### 41 *Frequency Distribution of the First Antidepressant Prescription by Therapeutic Class*

42 Overall, there were substantial differences between jurisdictions in the choice of starting therapy for new  
43 users (Table 3). Tricyclic antidepressants were the most commonly used class of antidepressants in  
44 England (48.8%) and Taiwan (52.4%) compared to selective serotonin reuptake inhibitors in North  
45 American jurisdictions (42.3%-53.3%). Notably, in the United Kingdom, approximately one-quarter of  
46 antidepressant prescriptions were for newer classes of antidepressants: serotonin antagonist & reuptake  
47 inhibitors (trazodone), norepinephrine-dopamine reuptake inhibitors (bupropion), and noradrenergic  
48 serotonin specific antidepressants (mirtazapine).  
49  
50  
51  
52

#### 53 *Co-Existence of Depression, Other Mental Health Problems and Chronic Pain*

54 The prevalence of a depression diagnosis among new antidepressant users was relatively low, varying  
55 from 9.1% (Taiwan) to 21.7% (USA). The exception was the EMR cohort in Quebec where the prevalence  
56  
57

1  
2  
3 was 43.0% (Table 4). Among new antidepressant users with a diagnosis of depression, there was a 30%  
4 (UK Prevalence Ratio: 1.3) to 7-fold (USA Prevalence Ratio: 7.3) increase in the likelihood of also having  
5 an alcohol or other substance abuse problem. Anxiety, which varied from being present in 12.1% of new  
6 antidepressant users in the UK to 47.8% of new users in Taiwan, was the most common mental health  
7 problem, and was also more likely to be present among persons with depression (Prevalence Ratio: 1.3  
8 (Ontario, Quebec) to 3.6 (USA) ). Although less common in all jurisdictions, both major mental illness and  
9 suicide attempt were more likely to be present among antidepressant users with depression compared to  
10 those without depression. In contrast, chronic pain was the most prevalent problem among new  
11 antidepressant users (41.2% (UK) to 68.2% (Taiwan) ), and was as likely to be present among those with  
12 or without depression (Prevalence Ratio: 0.9-1.3) (Table 4). For almost one-third of new antidepressant  
13 users, there was no documented diagnosis of depression, other mental health problems or chronic pain.  
14  
15  
16  
17

### 18 *Choice of Anti-depressant by Potential Treatment Indication*

19  
20 Among new antidepressant users with a diagnosis of depression, selective serotonin reuptake inhibitors  
21 were selected as the starting therapy for 55.2% (Ontario) to 71.4% (UK), followed by SNRIs in Canadian  
22 jurisdictions, and newer antidepressants in Boston, the UK, and Taiwan (Table 5). For antidepressant users  
23 with a diagnosis of chronic pain, starting therapy was predominantly with SSRIs in North American  
24 jurisdictions (33.5%-46.1%), and with TCAs in the UK and Taiwan (55.2%-60.4%). Selection of therapy for  
25 other mental health problems was a mixture of choices made for persons with a diagnosis of depression  
26 and chronic pain.  
27  
28  
29

### 30 *Characteristics of the First Treatment Episode by Potential Treatment Indication*

31  
32 Among patients with a diagnosis of depression who were started on antidepressants, 54% (Ontario) to  
33 68% (Taiwan) remained on their initial course of antidepressant treatment (Table 6A). For this group, the  
34 mean duration of treatment varied from 104.7 (Taiwan) to 340.9 (Quebec) days, and the mean dose varied  
35 from 60% of (0.6) of the recommended adult dose (Taiwan), to the recommended adult dose in the United  
36 States site (mean dose: 1.0). Among the 32% (Taiwan) to 46% (Ontario) with a change in treatment, the  
37 most common change in all jurisdictions was an increase in dose occurring in 20% (Taiwan) to 33%  
38 (Ontario) of patients, followed by a decrease in dose (13% (Taiwan) to 21% (Ontario)), and the addition of  
39 a drug from a different therapeutic class (6% (UK) to 18% (Ontario)). Among patients with a change in  
40 therapy in their initial treatment episode, the mean duration of treatment was almost double (mean  
41 duration 312.6 to 616.9 days) than for patients with no change, and the mean dose during treatment was  
42 substantially higher (mean standardized proportion of the adult dose: 0.8 to 1.4).  
43  
44  
45  
46

47 The first treatment episode for new antidepressant users with a diagnosis of chronic pain was substantially  
48 different than patients with a diagnosis of depression (Table 6B). Overall, 66% (Ontario) to 79% (Taiwan)  
49 were kept on the initial treatment regimen, for a much shorter duration than for new users with a  
50 diagnosis of depression (mean duration: 83.6 days (Taiwan) to 300.9 days (Quebec)), and at lower mean  
51 doses (mean standardized proportion of the adult dose: 0.4 (Taiwan, UK, Montreal) to 0.8 (U.S.)). For the  
52 21% to 34% of patients who had a change in treatment, the most common changes in all jurisdictions  
53 were an increase in dose (13% to 25%), a decrease in dose (9% to 14%) and the addition of another drug  
54 from a different therapeutic class (3% to 11%). For those with a change in treatment, the duration of the  
55  
56  
57  
58  
59  
60

1  
2  
3 treatment episode was considerably longer in all jurisdictions (264.4 to 590.0 days), and the mean dose  
4 during the treatment episode was higher (0.5 to 1.1).  
5  
6  
7

## 8 **INTERPRETATION**

9  
10 This multi-national study is the first to compare the use of antidepressants among comparable cohorts of  
11 new users in different countries. We found wide variation in the incidence and prevalence of  
12 antidepressant use; the lowest rate was in the UK where guidelines for pharmacotherapy use for  
13 depression were the most conservative. Choice of starting therapy also varied widely by country and  
14 condition, with the UK and Taiwan more likely to use tricyclic antidepressants for persons with a diagnosis  
15 of chronic pain whereas selective serotonin reuptake inhibitors were the most common choice for both  
16 depression and pain in North American settings. Overall treatment duration was longer for patients with  
17 depression than chronic pain, mean treatment doses were higher, and there were more likely to be  
18 changes in therapy.  
19  
20  
21  
22

23 Differences in the incidence of antidepressant use in different countries as well as the choice of  
24 antidepressant therapy may also be influenced by a variety of system-related factors. For example, direct  
25 to consumer advertising of prescription drugs is permitted in the USA but banned in Canada, Europe, and  
26 the UK because these ads drive demand for specific treatments[30]. Also, drugs available and covered by  
27 public insurance plans in the UK, Taiwan and Canada are influenced by rigorous reviews and guidelines  
28 for the use of new drugs and technologies by national agencies such as the National Institute for Health  
29 and Care Excellence in the United Kingdom[31-33].  
30  
31  
32

33 A surprisingly large percentage of older adults were prescribed antidepressants for conditions other than  
34 depression. We found that chronic pain was the most common problem documented and it appeared to  
35 be the most likely reason for antidepressant use. Chronic pain has an estimated prevalence of 11.8%[34]  
36 to 43.5%[35] in adults, and increases with age, with an estimated 62% of those 75 years of age or older  
37 experiencing this problem[35]. While use of antidepressants for chronic pain has been shown to be  
38 effective, particularly tricyclic antidepressants (amitriptyline) and serotonin noradrenalin reuptake  
39 inhibitors (duloxetine) for neurogenic pain[36 37], tricyclic antidepressants have been on the lists of  
40 potentially contraindicated medications for the elderly for over a decade because of their potent anti-  
41 cholinergic effects that can lead to cognitive impairment, and other avoidable morbidity[38 39].  
42 Moreover, only one antidepressant, duloxetine has been approved for treatment of chronic pain in North  
43 America and Europe[11]. Although the anticholinergic effects of tricyclic antidepressants have been well  
44 documented[40-42], the actual “real-world” evidence of harm is limited[43], and should be addressed in  
45 future studies given the high rates of use. The variation in approach in the use of antidepressants for  
46 depression and chronic pain in different countries creates the natural experiment that could generate  
47 unbiased evidence of potential harms and benefits.  
48  
49  
50  
51  
52  
53

54 Notably, in this study of older adults, depression was documented in only two in ten users; the exception  
55 being in Quebec City/Montreal where four out of ten patients were prescribed antidepressants for  
56  
57

1  
2  
3 depression. There are known problems in under-reporting, diagnosis and documentation of  
4 depression[44-46] , which may account for some or all of these differences between sites. The MOXXI  
5 system used in the Quebec cohort likely provides an approximate estimate of the extent to which  
6 depression is undocumented. In this cohort, physicians are required to document the treatment indication  
7 for each drug prescribed[47], data that has been validated in prior studies[48]. Results from this setting  
8 suggest that twice as many patients receive antidepressants for depression, whereas a similar proportion  
9 of new antidepressant users had a diagnosis of chronic pain as in other sites.  
10  
11

12  
13 Also, of interest, among patients with documented depression, antidepressant use in all countries  
14 followed current guidelines for depression management[21 24 49 50]. Choice of first-line therapy was  
15 predominantly selective serotonin reuptake inhibitors and serotonin-norepinephrine reuptake inhibitors.  
16 Starting doses were lower than the recommended adult doses, mean duration of treatment was 251-525  
17 days, and the main changes in treatment were increases in doses and the addition of an antidepressant  
18 from a different therapeutic class. Not surprisingly, among patients where there was a change in  
19 treatment, both the average antidepressant dose was higher and treatment duration was longer,  
20 suggesting a lack of treatment effectiveness. The cohort in Taiwan was different in a number of respects  
21 including lower antidepressant doses, shorter treatment duration, and fewer changes in therapy once  
22 started. The reason for these differences in approach is not clear. They may represent an innate  
23 conservatism in the use of antidepressants in the Taiwanese population where there is an acknowledged  
24 absence of evidence to support clinical guidelines[50], or known differences in genetic determinants of  
25 drug metabolism that have been established in population-based genomic studies of drug  
26 metabolism[51].  
27  
28  
29  
30  
31

32  
33 This study has several limitations to consider in the interpretation of results. Efforts were made to  
34 harmonize data from different sources and countries, however both measurement and reporting issues  
35 may lead to arbitrary differences between regions and countries. With the exception of the Quebec  
36 cohort, treatment indication is unknown. Documentation of health problems in medical services billing  
37 data and EMRs was used as a proxy for treatment indication, which based on past studies has a predictive  
38 value of 7.8 – 80.3%[52]. The resulting misclassification will attenuate differences observed in treatment  
39 approach between conditions. Moreover, diagnoses of health problems tend to be under-reported in  
40 administrative data. While the Ontario, Montreal, and Taiwan cohorts represented total populations or  
41 representative samples, the UK, Quebec, and USA cohorts were assembled on the basis of practices  
42 supported by specific information technology systems. The trends observed in these more selected  
43 populations however are similar to those reported for antidepressant use in older adults in these  
44 countries[6 53-58].  
45  
46  
47  
48

49  
50 In conclusion, antidepressant use in older adults varies up to 24-fold by country (cumulative incidence  
51 from 0.7% to 17.0%), and chronic pain appears to be the most common treatment indication in all  
52 jurisdictions, even more so than depression. Evaluation of real-world risks and benefits of antidepressants  
53 by treatment indication should be a priority for future research. The relative contraindication of tricyclic  
54 antidepressants in older adults because of their potent anticholinergic effects needs to be assessed given  
55 their high rate of use, and proven efficacy in pain management[36-39].  
56  
57

1  
2  
3 **Funding:** This project was funded by the Canadian Institutes of Health Research (CIHR) operating grant #  
4 MOP-111166.  
5

6  
7 **Ethical Approval:** This study received ethics approval from the McGill University Institutional Review  
8 Board (IRB # A01-B02-02A), the Institute for Clinical Evaluative Sciences, the Partners Human Research  
9 Committee IRB (Protocol # 2011P000773/PH), and the Independent Scientific Advisory Committee (ISAC)  
10 of CPRD (Protocol # 14\_081R).  
11

12  
13 **Transparency Declaration:** The lead author, Dr. Robyn Tamblyn, affirms that this manuscript is an honest,  
14 accurate, and transparent account of the study being reported; that no important aspects of the study  
15 have been omitted and that any discrepancies from the study as planned have been explained.  
16

17  
18 **Competing interests:** None to disclose  
19

20  
21 **Data sharing:** No additional data available  
22

23 **Contributors:** RT, DWB, DLB, WGD, AJF, JSH, and JL contributed to the study concept and design. NG, TS,  
24 and BH contributed to the statistical analysis. RT drafted the manuscript. DWB, DLB, WGD, AJF, NG, JSH,  
25 BH, SK, JL, and TS critically reviewed the manuscript for intellectual content. All authors read and approved  
26 the final manuscript.  
27  
28  
29  
30  
31  
32  
33  
34  
35  
36  
37  
38  
39  
40  
41  
42  
43  
44  
45  
46  
47  
48  
49  
50  
51  
52  
53  
54  
55  
56  
57  
58  
59  
60

## Reference List

1. WHO. Depression. In: Organization WH, ed., 2017.
2. OECD. Health at a Glance 2015: OECD indicators. OECD Indicators, OECD Publishing, Paris. DOI: [https://doi.org/10.1787/health\\_glance-2015-en](https://doi.org/10.1787/health_glance-2015-en). Accessed February, 2015:217.
3. Chee KY, Tripathi A, Avasthi A, et al. International study on antidepressant prescription pattern at 40 major psychiatric institutions and hospitals in Asia: A 10-year comparison study. *Asia Pac Psychiatry* 2015;**7**(4):366-74 doi: 10.1111/appy.12176[published Online First: Epub Date]].
4. Burton C, Anderson N, Wilde K, Simpson CR. Factors associated with duration of new antidepressant treatment: analysis of a large primary care database. *Br J Gen Pract* 2012;**62**(595):e104-12 doi: 10.3399/bjgp12X625166[published Online First: Epub Date]].
5. Rotermann M, Sanmartin C, Hennessy D, Arthur M. Prescription medication use by Canadians aged 6 to 79. *Health Rep* 2014;**25**(6):3-9
6. Pratt LA, Brody DJ, Gu Q. Antidepressant use in persons aged 12 and over: United States, 2005-2008. *NCHS Data Brief* 2011(76):1-8
7. Zhong W, Kremers HM, Yawn BP, et al. Time trends of antidepressant drug prescriptions in men versus women in a geographically defined US population. *Arch Womens Ment Health* 2014;**17**(6):485-92 doi: 10.1007/s00737-014-0450-7[published Online First: Epub Date]].
8. Ivanova JI, Bienfait-Beuzon C, Birnbaum HG, Connolly C, Emani S, Sheehy M. Physicians' decisions to prescribe antidepressant therapy in older patients with depression in a US managed care plan. *Drugs Aging* 2011;**28**(1):51-62 doi: 10.2165/11539900-000000000-00000[published Online First: Epub Date]].
9. Singh R, Mazi-Kotwal N, Thalitaya MD. Recognising and Treating Depression in the Elderly. *Psychiatr Danub* 2015;**27** **Suppl 1**:S231-4
10. PHSA. Chronic disease multi-morbidity. How healthy are Canadians? A Trend analysis of the health of Canadians from a healthy living and chronic disease perspective.: Public Health Agency of Canada, 2014:23-24.
11. Wong J, Motulsky A, Abrahamowicz M, Egale T, Buckeridge DL, Tamblyn R. Off-label indications for antidepressants in primary care: descriptive study of prescriptions from an indication based electronic prescribing system. *BMJ* 2017;**356**:j603 doi: 10.1136/bmj.j603[published Online First: Epub Date]].
12. Wong J, Motulsky A, Egale T, Buckeridge DL, Abrahamowicz M, Tamblyn R. Treatment indications for antidepressants prescribed in primary care in quebec, canada, 2006-2015. *JAMA* 2016;**315**(20):2230-32 doi: 10.1001/jama.2016.3445[published Online First: Epub Date]].
13. Egale T, Buckeridge DL, Winslade NE, Benedetti A, Hanley JA, Tamblyn R. Drug, patient, and physician characteristics associated with off-label prescribing in primary care. *Archives of internal medicine* 2012;**172**(10):781-8 doi: 10.1001/archinternmed.2012.340[published Online First: Epub Date]].
14. Chen H, Reeves JH, Fincham JE, Kennedy WK, Dorfman JH, Martin BC. Off-label use of antidepressant, anticonvulsant, and antipsychotic medications among Georgia medicaid enrollees in 2001. *The Journal of clinical psychiatry* 2006;**67**(6):972-82
15. Mojtabai R, Olfson M. Proportion of antidepressants prescribed without a psychiatric diagnosis is growing. *Health Aff (Millwood)* 2011;**30**(8):1434-42 doi: 10.1377/hlthaff.2010.1024[published Online First: Epub Date]].
16. Mojtabai R. Diagnosing depression in older adults in primary care. *N Engl J Med* 2014;**370**(13):1180-2 doi: 10.1056/NEJMp1311047[published Online First: Epub Date]].
17. Wang CY, Fu SH, Wang CL, Chen PJ, Wu FL, Hsiao FY. Serotonergic antidepressant use and the risk of fracture: a population-based nested case-control study. *Osteoporos Int* 2016;**27**(1):57-63 doi: 10.1007/s00198-015-3213-z[published Online First: Epub Date]].
18. Moura C, Bernatsky S, Abrahamowicz M, et al. Antidepressant use and 10-year incident fracture risk: the population-based Canadian Multicentre Osteoporosis Study (CaMoS). *Osteoporos Int* 2014;**25**(5):1473-81 doi: 10.1007/s00198-014-2649-x[published Online First: Epub Date]].

19. Orriols L, Wilchesky M, Lagarde E, Suissa S. Prescription of antidepressants and the risk of road traffic crash in the elderly: a case-crossover study. *Br J Clin Pharmacol* 2013;**76**(5):810-5 doi: 10.1111/bcp.12090[published Online First: Epub Date]].
20. McIntyre RS, Suppes T, Tandon R, Ostacher M. Florida Best Practice Psychotherapeutic Medication Guidelines for Adults With Major Depressive Disorder. *The Journal of clinical psychiatry* 2017;**78**(6):703-13 doi: 10.4088/JCP.16cs10885[published Online First: Epub Date]].
21. Kennedy SH, Lam RW, McIntyre RS, et al. Canadian Network for Mood and Anxiety Treatments (CANMAT) 2016 Clinical Guidelines for the Management of Adults with Major Depressive Disorder: Section 3. Pharmacological Treatments. *Can J Psychiatry* 2016;**61**(9):540-60 doi: 10.1177/0706743716659417[published Online First: Epub Date]].
22. APA. The American Psychiatric Association Practice Guidelines for the Psychiatric Evaluation of Adults. Third ed: American Psychiatric Association, 2016:170.
23. Mulsant BH, Blumberger DM, Ismail Z, Rabheru K, Rapoport MJ. A systematic approach to pharmacotherapy for geriatric major depression. *Clin Geriatr Med* 2014;**30**(3):517-34 doi: 10.1016/j.cger.2014.05.002[published Online First: Epub Date]].
24. NICE. Depression in adults: recognition and management. UK: National Institute for Health and Care Excellence, 2009.
25. Tamblyn R, Girard N, Dixon WG, et al. Pharmacosurveillance without borders: electronic health records in different countries can be used to address important methodological issues in estimating the risk of adverse events. *Journal of clinical epidemiology* 2016;**77**:101-11 doi: 10.1016/j.jclinepi.2016.03.033[published Online First: Epub Date]].
26. Herrett E, Gallagher AM, Bhaskaran K, et al. Data Resource Profile: Clinical Practice Research Datalink (CPRD). *International Journal of Epidemiology* 2015;**44**(3):827-36 doi: 10.1093/ije/dyv098[published Online First: Epub Date]].
27. Lacasse A, Ware MA, Dorais M, Lanctot H, Choiniere M. Is the Quebec provincial administrative database a valid source for research on chronic non-cancer pain? *Pharmacoepidemiology and drug safety* 2015;**24**(9):980-90 doi: 10.1002/pds.3820[published Online First: Epub Date]].
28. Hohl CM, Zed PJ, Brubacher JR, Abu-Laban RB, Loewen PS, Pursell RA. Do Emergency Physicians Attribute Drug-Related Emergency Department Visits to Medication-Related Problems? *Annals of Emergency Medicine* 2010;**55**(6):493-502.e4 doi: <https://doi.org/10.1016/j.annemergmed.2009.10.008>[published Online First: Epub Date]].
29. Thompson ML, Myers JE, Kriebel D. Prevalence odds ratio or prevalence ratio in the analysis of cross sectional data: what is to be done? *Occupational and environmental medicine* 1998;**55**(4):272-7
30. Magrini N, Font M. Direct to consumer advertising of drugs in Europe. *BMJ* 2007;**335**(7619):526-26 doi: 10.1136/bmj.39310.506308.AD[published Online First: Epub Date]].
31. The development and updating of local formularies, NICE good practice guidance: National Institute for Health and Clinical Excellence (NICE), 2012.
32. Technology appraisal guidance. Secondary Technology appraisal guidance. <https://www.nice.org.uk/about/what-we-do/our-programmes/nice-guidance/nice-technology-appraisal-guidance>.
33. CADTH Common Drug Review (CDR). Secondary CADTH Common Drug Review (CDR). <https://www.cadth.ca/about-cadth/what-we-do/products-services/cdr>.
34. Mansfield KE, Sim J, Jordan JL, Jordan KP. A systematic review and meta-analysis of the prevalence of chronic widespread pain in the general population. *Pain* 2016;**157**(1):55-64 doi: 10.1097/j.pain.0000000000000314[published Online First: Epub Date]].
35. Fayaz A, Croft P, Langford RM, Donaldson LJ, Jones GT. Prevalence of chronic pain in the UK: a systematic review and meta-analysis of population studies. *BMJ Open* 2016;**6**(6) doi: 10.1136/bmjopen-2015-010364[published Online First: Epub Date]].
36. Fennema J, Petrykiv S, de Jonge L, Arts M. Efficacy and safety of antidepressants as analgesics in chronic pain: A review. *European Psychiatry* 2017;**41**:S234 doi: <https://doi.org/10.1016/j.eurpsy.2017.01.2248>[published Online First: Epub Date]].
37. Finnerup NB, Attal N, Haroutounian S, et al. Pharmacotherapy for neuropathic pain in adults: a systematic review and meta-analysis. *The Lancet Neurology* 2015;**14**(2):162-73 doi: 10.1016/S1474-4422(14)70251-0[published Online First: Epub Date]].



- 1  
2 38. O'Mahony D, O'Sullivan D, Byrne S, O'Connor MN, Ryan C, Gallagher P. STOPP/START criteria for potentially  
3 inappropriate prescribing in older people: version 2. Age and ageing 2015;**44**(2):213-8 doi:  
4 10.1093/ageing/afu145[published Online First: Epub Date]].
- 5 39. American Geriatrics Society 2015 Updated Beers Criteria for Potentially Inappropriate Medication Use in Older Adults.  
6 J Am Geriatr Soc 2015;**63**(11):2227-46 doi: 10.1111/jgs.13702[published Online First: Epub Date]].
- 7 40. Chew ML, Mulsant BH, Pollock BG, et al. Anticholinergic activity of 107 medications commonly used by older adults. J  
8 Am Geriatr Soc 2008;**56**(7):1333-41 doi: 10.1111/j.1532-5415.2008.01737.x[published Online First: Epub Date]].
- 9 41. Pollock BG, Mulsant BH, Nebes R, et al. Serum anticholinergic activity in elderly depressed patients treated with paroxetine  
10 or nortriptyline. The American journal of psychiatry 1998;**155**(8):1110-2 doi: 10.1176/ajp.155.8.1110[published  
11 Online First: Epub Date]].
- 12 42. Duran CE, Azermai M, Vander Stichele RH. Systematic review of anticholinergic risk scales in older adults. European  
13 journal of clinical pharmacology 2013;**69**(7):1485-96 doi: 10.1007/s00228-013-1499-3[published Online First: Epub  
14 Date]].
- 15 43. Collamati A, Martone AM, Poscia A, et al. Anticholinergic drugs and negative outcomes in the older population: from  
16 biological plausibility to clinical evidence. Aging clinical and experimental research 2016;**28**(1):25-35 doi:  
17 10.1007/s40520-015-0359-7[published Online First: Epub Date]].
- 18 44. Bharadwaj P, Pai MM, Suziedelyte A. Mental health stigma. Economics Letters 2017;**159**:57-60 doi:  
19 <https://doi.org/10.1016/j.econlet.2017.06.028>[published  
20 Online First: Epub Date]].
- 21 45. Hunt M, Auriemma J, Cashaw ACA. Self-Report Bias and Underreporting of Depression on the BDI-II. Journal of  
22 Personality Assessment 2003;**80**(1):26-30 doi: 10.1207/S15327752JPA8001\_10[published Online First: Epub  
23 Date]].
- 24 46. Cepoiu M, McCusker J, Cole MG, Sewitch M, Belzile E, Ciampi A. Recognition of Depression by Non-psychiatric  
25 Physicians—A Systematic Literature Review and Meta-analysis. Journal of General Internal Medicine  
26 2008;**23**(1):25-36 doi: 10.1007/s11606-007-0428-5[published Online First: Epub Date]].
- 27 47. Tamblyn R, Huang A, Kawasumi Y, et al. The Development and Evaluation of an Integrated Electronic Prescribing and  
28 Drug Management System for Primary Care. Journal of the American Medical Informatics Association  
29 2006;**13**(2):148-59 doi: 10.1197/jamia.M1887[published Online First: Epub Date]].
- 30 48. Eguale T, Winslade N, Hanley JA, Buckeridge DL, Tamblyn R. Enhancing Pharmacosurveillance with Systematic  
31 Collection of Treatment Indication in Electronic Prescribing. Drug Safety 2010;**33**(7):559-67 doi:  
32 10.2165/11534580-000000000-00000[published Online First: Epub Date]].
- 33 49. Gelenberg AJF, M. P.; Markowitz, J. C.; Rosenbaum, J. F.; Thase, M. E.; Trivedi, M. H.; Van Rhoads, R. S. Practice  
34 Guideline for the Treatment of Patients with Major Depressive Disorder: American Psychiatric Association, 2010.
- 35 50. Treuer T, Liu CY, Salazar G, et al. Use of antidepressants in the treatment of depression in Asia: guidelines, clinical  
36 evidence, and experience revisited. Asia Pac Psychiatry 2013;**5**(4):219-30 doi: 10.1111/appy.12090[published  
37 Online First: Epub Date]].
- 38 51. Kirchheiner J, Nickchen K, Bauer M, et al. Pharmacogenetics of antidepressants and antipsychotics: the contribution of  
39 allelic variations to the phenotype of drug response. Molecular Psychiatry 2004;**9**:442 doi:  
40 10.1038/sj.mp.4001494[published Online First: Epub Date]].
- 41 52. Jenna W, Michal A, L. BD, Robyn T. Assessing the accuracy of using diagnostic codes from administrative data to infer  
42 antidepressant treatment indications: a validation study. Pharmacoepidemiology and drug safety;**0**(0) doi:  
43 doi:10.1002/pds.4436[published Online First: Epub Date]].
- 44 53. Gobert M, D'hoore W. Prevalence of psychotropic drug use in nursing homes for the aged in Quebec and in the  
45 French-speaking area of Switzerland. International Journal of Geriatric Psychiatry 2005;**20**(8):712-21 doi:  
46 doi:10.1002/gps.1349[published Online First: Epub Date]].
- 47 54. Beck CA, Williams JV, Wang JL, et al. Psychotropic Medication Use in Canada. The Canadian Journal of Psychiatry  
48 2005;**50**(10):605-13 doi: 10.1177/070674370505001006[published Online First: Epub Date]].
- 49 55. Beck CA, Patten SB, Williams JVA, et al. Antidepressant utilization in Canada. Social Psychiatry and Psychiatric  
50 Epidemiology 2005;**40**(10):799 doi: 10.1007/s00127-005-0968-0[published Online First: Epub Date]].
- 51  
52  
53  
54  
55  
56  
57  
58  
59  
60

- 1  
2 56. Lewer D, O'Reilly C, Mojtabai R, Evans-Lacko S. Antidepressant use in 27 European countries: Associations with  
3 sociodemographic, cultural and economic factors. *British Journal of Psychiatry* 2018;**207**(3):221-26 doi:  
4 10.1192/bjp.bp.114.156786[published Online First: Epub Date]].
- 5 57. Petty DR, House A, Knapp P, Raynor T, Zermansky A. Prevalence, duration and indications for prescribing of  
6 antidepressants in primary care. *Age and ageing* 2006;**35**(5):523-26 doi: 10.1093/ageing/af023[published Online  
7 First: Epub Date]].
- 8 58. Mark TL, Joish VN, Hay JW, Sheehan DV, Johnston SS, Cao Z. Antidepressant Use in Geriatric Populations: The Burden  
9 of Side Effects and Interactions and Their Impact on Adherence and Costs. *The American Journal of Geriatric  
10 Psychiatry* 2011;**19**(3):211-21 doi: <https://doi.org/10.1097/JGP.0b013e3181f1803d>[published  
11 Online First: Epub  
12 Date]].
- 13  
14  
15  
16  
17  
18  
19  
20  
21  
22  
23  
24  
25  
26  
27  
28  
29  
30  
31  
32  
33  
34  
35  
36  
37  
38  
39  
40  
41  
42  
43  
44  
45  
46  
47  
48  
49  
50  
51  
52  
53  
54  
55  
56  
57  
58  
59  
60

Table 1. Summary of Depression Guidelines

|                                                                                                                               | US – APA guidelines (2010)                                                                                                                                                                                                                                                                                                                                                                                                                                                                                                                                                                                                                                                                                                                                                                                                                                        | UK – NICE guidelines (2009)                                                                                                                                                                                                                                                                                                                                                                                                                                                                                                                                                                                                                                                                                                                                                                                                                                                                                                                      | Canada – CANMAT (2016)                                                                                                                                                                                                                                                                                                                                                                                                                                                                                                                                                                                                                                                          | Taiwan - Taiwan Association Against Depression (2012)                                   |
|-------------------------------------------------------------------------------------------------------------------------------|-------------------------------------------------------------------------------------------------------------------------------------------------------------------------------------------------------------------------------------------------------------------------------------------------------------------------------------------------------------------------------------------------------------------------------------------------------------------------------------------------------------------------------------------------------------------------------------------------------------------------------------------------------------------------------------------------------------------------------------------------------------------------------------------------------------------------------------------------------------------|--------------------------------------------------------------------------------------------------------------------------------------------------------------------------------------------------------------------------------------------------------------------------------------------------------------------------------------------------------------------------------------------------------------------------------------------------------------------------------------------------------------------------------------------------------------------------------------------------------------------------------------------------------------------------------------------------------------------------------------------------------------------------------------------------------------------------------------------------------------------------------------------------------------------------------------------------|---------------------------------------------------------------------------------------------------------------------------------------------------------------------------------------------------------------------------------------------------------------------------------------------------------------------------------------------------------------------------------------------------------------------------------------------------------------------------------------------------------------------------------------------------------------------------------------------------------------------------------------------------------------------------------|-----------------------------------------------------------------------------------------|
| 1<br>2<br>3<br>4<br>5<br>6<br>7<br>8<br>9<br>10<br>11<br>12<br>13<br>14<br>15<br>16<br>17<br>18<br>19<br>20<br>21<br>22<br>23 | <p><b>First line treatment</b></p> <p>Antidepressant medications for patients with <b>mild, moderate, or severe MDD</b>, especially patients with a history of prior positive response, moderate to severe symptoms, significant sleep or appetite disturbances, agitation, patient preference, etc.</p> <p><u>Psychotherapy</u> for patients with <b>mild/moderate MDD</b>, especially in the presence of significant psychosocial stressors, intrapsychic conflict, interpersonal difficulties, a co-occurring Axis II disorder, treatment availability, or patient preference.</p> <p>The <u>combination of psychotherapy and antidepressant medication</u> for patients with <b>moderate to severe MDD</b>, as well as in milder cases for patients with psychosocial or interpersonal problems, intrapsychic conflict, or co-occurring Axis II disorder.</p> | <p>For patients with <b>persistent subthreshold depressive symptoms or mild to moderate depression</b>, first-line treatment is <u>low-intensity psychosocial interventions</u>. Antidepressants should only be considered for patients with a past history of moderate or severe depression, initial presentation of symptoms that have been present for a long period (at least 2 years), or subthreshold depressive symptoms or mild depression that persists after other interventions.</p> <p>For patients with <b>persistent subthreshold depressive symptoms or mild to moderate depression with inadequate response to initial interventions</b>, an <u>antidepressant or a high-intensity psychological intervention</u> should be considered.</p> <p>For patients with <b>moderate or severe depression</b>, a <u>combination of antidepressant medication and a high-intensity psychological intervention</u> should be provided.</p> | <p>Second-generation antidepressants are first line treatments for patients with a <b>major depressive episode of moderate or greater severity</b>.</p> <p>First line treatments for individuals with <b>depression of mild severity</b> include <u>psychoeducation, self-management, and psychological treatment</u>. Pharmacological treatments can be considered for mild depression in some situations, including patient preference, previous response to antidepressants, or lack of response to nonpharmacological interventions.</p> <p><u>Psychotherapy</u> should be considered for <b>patients with inadequate antidepressant response to initial treatment</b>.</p> | <p><u>Pharmacotherapy (preferred) or psychotherapy</u></p>                              |
| 24<br>25<br>26<br>27<br>28<br>29<br>30<br>31<br>32<br>33<br>34<br>35<br>36<br>37<br>38                                        | <p><b>Pharmacotherapy first-line treatment</b></p> <p>Antidepressant selection should be based on the tolerability, safety, and cost of the medication, as well as patient preference and history of prior medication treatment.</p> <p><b>SSRIs, SNRIs, mirtazapine, and bupropion</b> are optimal for most patients.</p> <p>MAOIs are limited to patients who do not respond to other treatments.</p>                                                                                                                                                                                                                                                                                                                                                                                                                                                           | <p>Prescribed antidepressant should normally be an <b>SSRI in a generic form</b>.</p> <p>When prescribing drugs other than SSRIs, the following should be considered:</p> <ul style="list-style-type: none"> <li>• The increased likelihood of the person stopping treatment because of side effects (and the consequent need to increase the dose gradually) with venlafaxine, duloxetine and TCAs.</li> <li>• The specific cautions, contraindications, and monitoring requirements for some drugs</li> <li>• Non-reversible MAOIs, such as phenelzine, should normally be prescribed only by specialist mental health professionals.</li> <li>• Dosulepin should not be prescribed</li> </ul>                                                                                                                                                                                                                                                 | <p>Choice of antidepressant should be based on patient factors (clinical features, patient preference, etc.) and medication factors (drug-drug interactions, cost, availability, efficacy and tolerability, etc.)</p> <p>First-line treatments include <b>SSRIs, SNRIs, agomelatine, bupropion, mirtazapine, mianserin and vortioxetine</b>.</p> <p>Second-line treatments include TCAs, quetiapine and trazodone, moclobemide and selegiline, levomilnacipran, and vilazodone.</p> <p>Third-line treatments include MAOIs and reboxetine.</p>                                                                                                                                  | <p><b>SSRIs, SNRIs, or any one of the newer antidepressive agents except MAOIs.</b></p> |

Table 2 Comparisons in the Cumulative Incidence and Prevalence of Episodes of Antidepressant Use in Adults 65 Years of Age or Older Between Regions and Countries

| Elderly Population                                    | Canada                                       |                                               |                                              | United States                     | United Kingdom                  | Taiwan                               |
|-------------------------------------------------------|----------------------------------------------|-----------------------------------------------|----------------------------------------------|-----------------------------------|---------------------------------|--------------------------------------|
|                                                       | Ontario Sample<br>(Admin. Data) <sup>1</sup> | Montreal Sample<br>(Admin. Data) <sup>1</sup> | Quebec City & Mtl<br>(EMR Data) <sup>2</sup> | Boston<br>(EMR Data) <sup>2</sup> | CPRD<br>(EMR Data) <sup>2</sup> | NHIRDB<br>(Admin. Data) <sup>1</sup> |
| <b>Total Population Elderly</b>                       | <b>2,053,588</b>                             | <b>120,777</b>                                | <b>28,273</b>                                | <b>83,394</b>                     | <b>2,436,180</b>                | <b>103,400</b>                       |
| <b>New Episodes of Antidepressant Use<sup>3</sup></b> |                                              |                                               |                                              |                                   |                                 |                                      |
| Number of New Users                                   | 306,197                                      | 13,303                                        | 1,308                                        | 10,131                            | 15,868                          | 17,580                               |
| Incidence in Elderly (%)                              | 14.9%                                        | 11.0%                                         | 4.6%                                         | 12.2%                             | 0.7%                            | 17.0%                                |
| Age Standardized Incidence (%)                        | 15.3%                                        | 12.1%                                         | 4.7%                                         | 12.3%                             | 0.7% (reference)                | 18.6%                                |
| <b>All Users of Antidepressants<sup>4</sup></b>       |                                              |                                               |                                              |                                   |                                 |                                      |
| Number of Users                                       | 549,444                                      | 23,422                                        | 4,450                                        | 17,359                            | 251,543                         | 24,239                               |
| Prevalence in Elderly (%)                             | 26.8%                                        | 19.4%                                         | 15.74%                                       | 20.8%                             | 10.3%                           | 23.4%                                |
| <b>Demographics</b>                                   |                                              |                                               |                                              |                                   |                                 |                                      |
| Between 65 – 74 years old                             | 162,895 (53.2%)                              | 5,713 (42.9%)                                 | 699 (53.4%)                                  | 5,826 (57.5%)                     | 7,129 (44.9%)                   | 8,811 (50.1%)                        |
| 75 years or older                                     | 143,302 (46.8%)                              | 7,590 (57.1%)                                 | 609 (46.6%)                                  | 4,305 (42.5%)                     | 8,739 (55.1%)                   | 8,769 (49.9%)                        |
| % Female                                              | 187,037 (61.1%)                              | 8,986 (67.5%)                                 | 853 (65.2%)                                  | 6,136 (60.6%)                     | 10,045 (63.3%)                  | 9,539 (54.3%)                        |

<sup>1</sup>Administrative data is retrieved from population-based health insurance claims for medical visits, and prescriptions.

<sup>2</sup>EMR data are extracted from primary care clinic electronic health records in the USA (Partners Inc.), Quebec (MOXXI), and the United Kingdom (Clinical Practice Research Database)

<sup>3</sup>New Episodes of Use of Antidepressants were defined as no prescription or dispensing of an antidepressant in the two years prior to the first antidepressant in the period 2009-2014

<sup>4</sup>All users include persons with an active prescription or dispensed supply of antidepressants between 2007-2008 as well as all new users between the period 2009-2014

Table 3 Frequency Distribution of the First Antidepressant Prescribed for New Antidepressant Users by Therapeutic Class by Country and Jurisdiction

| Antidepressant                                          | Canada                             |                                    |                                  | United States                      | United Kingdom                     | Taiwan                             |
|---------------------------------------------------------|------------------------------------|------------------------------------|----------------------------------|------------------------------------|------------------------------------|------------------------------------|
|                                                         | Ontario Sample                     | Montreal Sample                    | Quebec City & Mtl                | Boston                             | CPRD                               | NHIRDB                             |
|                                                         | (N=60,366 patients<br>N=61,696 Rx) | (N=13,303 patients<br>N=14,217 Rx) | (N=1,308 patients<br>N=1,324 Rx) | (N=10,131 patients<br>N=10,586 Rx) | (N=15,868 patients<br>N=15,970 Rx) | (N=17,580 patients<br>N=17,790 Rx) |
|                                                         | N Rx (%)                           | N Rx (%)                           | N Rx (%)                         | N Rx (%)                           | N Rx (%)                           | N Rx (%)                           |
| <b>Selective Serotonin Reuptake Inhibitors</b>          |                                    |                                    |                                  |                                    |                                    |                                    |
| Citalopram                                              | 8,760 (14.2%)                      | 4,708 (33.1%)                      | 410 (30.9%)                      | 2,117 (19.9%)                      | 4,232 (26.4%)                      | 335 (1.8%)                         |
| Escitalopram                                            | 9,000 (14.6%)                      | 1 (0.0%)                           | 73 (5.5%)                        | 438 (4.1%)                         | 145 (0.9%)                         | 825 (4.6%)                         |
| Fluoxetine                                              | 697 (1.1%)                         | 114 (0.8%)                         | 8 (0.6%)                         | 1,156 (10.9%)                      | 876 (5.4%)                         | 773 (4.3%)                         |
| Fluvoxamine                                             | 172 (0.3%)                         | 44 (0.3%)                          | 6 (0.4%)                         | 29 (0.2%)                          | 1 (0.0%)                           | 101 (0.5%)                         |
| Paroxetine                                              | 1,924 (3.1%)                       | 515 (3.6%)                         | 23 (1.7%)                        | 432 (4.0%)                         | 92 (0.5%)                          | 435 (2.4%)                         |
| Sertraline                                              | 2,561 (4.2%)                       | 640 (4.5%)                         | 132 (20.2%)                      | 1,481 (13.9%)                      | 990 (6.1%)                         | 1,174 (32.2%)                      |
| <b>Subtotal</b>                                         | <b>23,114 (37.4%)</b>              | <b>6,022 (42.3%)</b>               | <b>652 (49.2%)</b>               | <b>5,653 (53.3%)</b>               | <b>6,336 (39.6%)</b>               | <b>3,643 (20.4%)</b>               |
| <b>Selective Noradrenaline Reuptake Inhibitors</b>      |                                    |                                    |                                  |                                    |                                    |                                    |
| Desvenlafaxine                                          | 0 (0.0%)                           | 1 (0.0%)                           | 4 (0.3%)                         | 28 (0.2%)                          | -                                  | -                                  |
| Duloxetine                                              | 3,190 (5.2%)                       | 161 (1.1%)                         | 57 (4.3%)                        | 267 (2.5%)                         | 156 (0.9%)                         | 241 (1.3%)                         |
| Milnacipran                                             | 0 (0.0%)                           | -                                  | -                                | 2 (0.0%)                           | -                                  | 18 (0.1%)                          |
| Venlafaxine                                             | 3,323 (5.4%)                       | 1,514 (10.6%)                      | 105 (7.9%)                       | 434 (4.0%)                         | 144 (0.8%)                         | 206 (1.1%)                         |
| <b>Subtotal</b>                                         | <b>6,513 (10.5%)</b>               | <b>1,676 (11.7%)</b>               | <b>166 (12.5%)</b>               | <b>731 (6.9%)</b>                  | <b>290 (1.8%)</b>                  | <b>465 (2.6%)</b>                  |
| <b>Tricyclic Antidepressants</b>                        |                                    |                                    |                                  |                                    |                                    |                                    |
| Amitriptyline                                           | 10,448 (16.9%)                     | 2,629 (18.4%)                      | 120 (9.0%)                       | 796 (7.5%)                         | 7,255 (45.4%)                      | 1,181 (6.6%)                       |
| Dosulepin                                               | -                                  | -                                  | -                                | -                                  | 177 (1.1%)                         | 25 (0.2%)                          |
| Imipramine                                              | -                                  | -                                  | -                                | 32 (0.3%)                          | 54 (0.3%)                          | 7,340 (41.2%)                      |
| Nortriptyline                                           | 3,158 (5.1%)                       | 95 (0.6%)                          | 18 (1.3%)                        | 566 (5.3%)                         | 208 (1.3%)                         | -                                  |
| Other TCAs                                              | 1,860 (12.0%)                      | 263 (1.8%)                         | 24 (1.8%)                        | 117 (1.1%)                         | 113 (0.7%)                         | 778 (4.4%)                         |
| <b>Subtotal</b>                                         | <b>15,466 (25.0%)</b>              | <b>2,987 (21.0%)</b>               | <b>162 (12.2%)</b>               | <b>1,511 (14.2%)</b>               | <b>7,807 (48.8%)</b>               | <b>9,324 (52.4%)</b>               |
| <b>Serotonin Antagonist &amp; Reuptake Inhibitors</b>   |                                    |                                    |                                  |                                    |                                    |                                    |
| Trazodone                                               | 12,373 (20.1%)                     | 2,362 (16.6%)                      | 192 (14.5%)                      | 1,279 (12.0%)                      | 360 (2.2%)                         | 3,574 (20.0%)                      |
| <b>Norepinephrine-Dopamine Reuptake Inhibitors</b>      |                                    |                                    |                                  |                                    |                                    |                                    |
| Bupropion                                               | 1,406 (2.3%)                       | 278 (1.9%)                         | 49 (3.7%)                        | 1,056 (9.9%)                       | 34 (0.2%)                          | 215 (1.2%)                         |
| <b>Noradrenergic Serotonin Specific Antidepressants</b> |                                    |                                    |                                  |                                    |                                    |                                    |
| Mirtazapine                                             | 2,819 (4.6%)                       | 892 (6.2%)                         | 103 (7.7%)                       | 354 (3.3%)                         | 1,141 (7.1%)                       | 535 (3.0%)                         |
| <b>Subtotal</b>                                         | <b>16,598 (26.9%)</b>              | <b>3,532 (24.8%)</b>               | <b>344 (26.0%)</b>               | <b>2,689 (25.4%)</b>               | <b>1,535 (9.6%)</b>                | <b>4,324 (24.3%)</b>               |
| <b>Other Antidepressants</b>                            | <b>5 (0.0%)</b>                    | <b>0 (0.0%)</b>                    | <b>0 (0.0%)</b>                  | <b>2 (0.0%)</b>                    | <b>2 (0.0%)</b>                    | <b>34 (0.2%)</b>                   |

1. Other tricyclic antidepressants include Amoxapine, Clomipramine, Desipramine, Doxepin, Lofepramine, and Trimipramine

2. Other antidepressants include Nefazodone, Maprotiline, Agomelatine, and Roboxetine

**Table 4 The Prevalence of Potential Therapeutic Indications; Depression, Other Mental Health Problems, and Chronic Pain Among New Antidepressant Users, and the Proportion of Persons with Depression who had Other Concurrent Mental Health Problems or Pain by Jurisdiction**

|                                  | Canada                                |                                        |                                         | USA                           | United Kingdom              | Taiwan                        |
|----------------------------------|---------------------------------------|----------------------------------------|-----------------------------------------|-------------------------------|-----------------------------|-------------------------------|
|                                  | Ontario Sample<br>(N=60,366 patients) | Montreal Sample<br>(N=13,303 patients) | Quebec City & Mtl<br>(N=1,308 patients) | Boston<br>(N=10,131 patients) | CPRD<br>(N=15,868 patients) | NHIRDB<br>(N=17,580 patients) |
| <b>Depression</b>                |                                       |                                        |                                         |                               |                             |                               |
| Prevalence, N (%)                | 7,484 (12.4%)                         | 2333 (17.5%)                           | 563 (43.0%)                             | 2203 (21.7%)                  | 2478 (15.6%)                | 1603 (9.1%)                   |
| <b>Alcohol/Drug Abuse</b>        |                                       |                                        |                                         |                               |                             |                               |
| Prevalence, N (%)                | 1989 (3.3%)                           | 326 (2.5%)                             | 23 (1.8%)                               | 290 (2.9%)                    | 4188 (26.4%)                | 224 (1.3%)                    |
| Abuse in Depressed, N (%)        | 450 (6.0%)                            | 97 (4.2%)                              | 12 (2.1%)                               | 194 (8.8%)                    | 795 (32.1%)                 | 25 (1.6%)                     |
| Prevalence Ratio                 | 2.1                                   | 2.0                                    | 1.4                                     | 7.3                           | 1.3                         | 1.3                           |
| <b>Anxiety</b>                   |                                       |                                        |                                         |                               |                             |                               |
| Prevalence, N (%)                | 23374 (38.7%)                         | 3641 (27.4%)                           | 465 (35.6%)                             | 1798 (17.7%)                  | 1914 (12.1%)                | 6277 (35.7%)                  |
| Anxiety in Depressed, N (%)      | 3684 (49.2%)                          | 807 (34.6%)                            | 218 (38.7%)                             | 905 (41.1%)                   | 588 (23.7%)                 | 767 (47.8%)                   |
| Prevalence Ratio                 | 1.3                                   | 1.3                                    | 1.2                                     | 3.6                           | 2.4                         | 1.4                           |
| <b>Major Mental Illness</b>      |                                       |                                        |                                         |                               |                             |                               |
| Prevalence, N (%)                | 2627 (4.4%)                           | 692 (5.2%)                             | 50 (3.8%)                               | 502 (5.0%)                    | 253 (1.6%)                  | 570 (3.2%)                    |
| Mental Ill. In Depressed, N (%)  | 1473 (19.7%)                          | 225 (9.6%)                             | 23 (4.1%)                               | 323 (14.7%)                   | 79 (3.2%)                   | 95 (5.9%)                     |
| Prevalence Ratio                 | 9.0                                   | 2.3                                    | 1.1                                     | 6.5                           | 2.5                         | 2.0                           |
| <b>Suicide Attempt</b>           |                                       |                                        |                                         |                               |                             |                               |
| Prevalence, N (%)                | 101 (0.2%)                            | 30 (0.2%)                              | -                                       | 72 (0.7%)                     | 129 (0.8%)                  | 6 (0.0%)                      |
| Suicide Att. in Depressed, N (%) | 80 (1.1%)                             | 8 (0.3%)                               | -                                       | 67 (3.0%)                     | 67 (2.7%)                   | 2 (0.1%)                      |
| Prevalence Ratio                 | 26.9                                  | 1.7                                    | -                                       | 48.2                          | 5.8                         | 5.0                           |
| <b>Chronic Pain</b>              |                                       |                                        |                                         |                               |                             |                               |
| Prevalence, N (%)                | 28687 (47.5%)                         | 6379 (48.0%)                           | 571 (43.7%)                             | 5200 (51.3%)                  | 6539 (41.2%)                | 11994 (68.2%)                 |
| Pain in Depressed, N (%)         | 3591 (48.0%)                          | 1105 (47.4%)                           | 235 (41.7%)                             | 1365 (62.0%)                  | 1021 (41.2%)                | 994 (62.0%)                   |
| Prevalence Ratio                 | 1.0                                   | 1.0                                    | 0.9                                     | 1.3                           | 1.0                         | 0.9                           |

Table 5 Starting Therapy for New Users of Antidepressants by Potential Therapeutic Indication by Therapeutic Class and Country

| Therapeutic Class                                                                    | Canada                                |                                        |                                         | United States                 | United Kingdom              | Taiwan                        |
|--------------------------------------------------------------------------------------|---------------------------------------|----------------------------------------|-----------------------------------------|-------------------------------|-----------------------------|-------------------------------|
|                                                                                      | Ontario Sample<br>(N=60,366 patients) | Montreal Sample<br>(N=13,303 patients) | Quebec City & Mtl<br>(N=1,308 patients) | Boston<br>(N=10,131 patients) | CPRD<br>(N=15,868 patients) | NHIRDB<br>(N=17,580 patients) |
|                                                                                      | N Rx (%)                              | N Rx (%)                               | N Rx (%)                                | N Rx (%)                      | N Rx (%)                    | N Rx (%)                      |
| <b>Starting Therapy for Persons with a Diagnosis of Depression</b>                   |                                       |                                        |                                         |                               |                             |                               |
| Selective Serotonin Re. Inh.                                                         | 4,357 (55.2%)                         | 1,548 (59.5%)                          | 386 (67.5%)                             | 1,388 (59.0%)                 | 1,797 (71.4%)               | 930 (55.8%)                   |
| Selective Noradrenaline Re. Inh.                                                     | 1,039 (13.2%)                         | 408 (15.7%)                            | 72 (12.6%)                              | 162 (6.9%)                    | 67 (2.7%)                   | 104 (6.2%)                    |
| Tricyclic Antidepressants                                                            | 647 (8.2%)                            | 129 (5.0%)                             | 20 (3.5%)                               | 179 (7.6%)                    | 319 (12.7%)                 | 138 (8.3%)                    |
| Serotonin Antagonist & Re. Inh.                                                      | 940 (11.9%)                           | 212 (8.2%)                             | 32 (5.6%)                               | 269 (11.4%)                   | 56 (2.2%)                   | 263 (15.8%)                   |
| Norepinephrine-Dopam Re. Inh.                                                        | 321 (4.1%)                            | 81 (3.1%)                              | 30 (5.2%)                               | 233 (9.9%)                    | 1 (0.0%)                    | 43 (2.6%)                     |
| Noradrenergic serotonin specific                                                     | 590 (7.5%)                            | 224 (8.6%)                             | 32 (5.6%)                               | 120 (5.1%)                    | 277 (11.0%)                 | 184 (11.0%)                   |
| Other                                                                                | 1 (0.0%)                              | -                                      | -                                       | 1 (0.0%)                      | -                           | 4 (0.2%)                      |
| <b>Starting Therapy for Persons with a Diagnosis of Chronic Pain</b>                 |                                       |                                        |                                         |                               |                             |                               |
| Selective Serotonin Re. Inh.                                                         | 9,823 (33.5%)                         | 2,643 (39.0%)                          | 268 (46.4%)                             | 2,481 (46.1%)                 | 2,085 (31.8%)               | 2,291 (18.9%)                 |
| Selective Noradrenaline Re. Inh.                                                     | 3,516 (12.0%)                         | 762 (11.2%)                            | 83 (14.4%)                              | 395 (7.3%)                    | 95 (1.5%)                   | 315 (2.6%)                    |
| Tricyclic Antidepressants                                                            | 8,771 (29.9%)                         | 1,863 (27.5%)                          | 100 (17.3%)                             | 1,176 (21.8%)                 | 3,963 (60.4%)               | 6,703 (55.2%)                 |
| Serotonin Antagonist & Re. Inh.                                                      | 5,410 (18.5%)                         | 1,020 (15.0%)                          | 65 (11.3%)                              | 703 (13.0%)                   | 89 (1.4%)                   | 2,353 (19.4%)                 |
| Norepinephrine-Dopam Re. Inh.                                                        | 551 (1.9%)                            | 108 (1.6%)                             | 24 (4.2%)                               | 424 (7.9%)                    | 17 (0.3%)                   | 126 (1.0%)                    |
| Noradrenergic serotonin specific                                                     | 1,221 (4.2%)                          | 386 (5.7%)                             | 38 (6.6%)                               | 211 (3.9%)                    | 315 (4.8%)                  | 330 (2.7%)                    |
| Other                                                                                | 3 (0.0%)                              | -                                      | -                                       | 2 (0.0%)                      | 1 (0.02%)                   | 27 (0.2%)                     |
| <b>Starting Therapy for Persons with a Diagnosis of Other Mental Health Problems</b> |                                       |                                        |                                         |                               |                             |                               |
| Selective Serotonin Re. Inh.                                                         | 13,018 (49.5%)                        | 2,459 (53.3%)                          | 309 (61.1%)                             | 1,384 (61.4%)                 | 2,565 (45.1%)               | 2,212 (32.3%)                 |
| Selective Noradrenaline Re. Inh.                                                     | 3,099 (11.8%)                         | 550 (11.9%)                            | 61 (12.1%)                              | 147 (6.5%)                    | 105 (1.9%)                  | 254 (3.7%)                    |
| Tricyclic Antidepressants                                                            | 3,823 (14.5%)                         | 563 (12.2%)                            | 28 (5.5%)                               | 186 (8.2%)                    | 2,518 (44.3%)               | 2,250 (32.8%)                 |
| Serotonin Antagonist & Re. Inh.                                                      | 4,107 (15.6%)                         | 591 (12.8%)                            | 53 (10.5%)                              | 280 (12.4%)                   | 102 (1.8%)                  | 1,684 (24.6%)                 |
| Norepinephrine-Dopam Re. Inh.                                                        | 773 (2.9%)                            | 98 (2.1%)                              | 18 (3.6%)                               | 163 (7.2%)                    | 20 (0.4%)                   | 126 (1.8%)                    |
| Noradrenergic serotonin specific                                                     | 1,480 (5.6%)                          | 357 (7.7%)                             | 37 (7.3%)                               | 94 (4.2%)                     | 374 (6.6%)                  | 318 (4.6%)                    |
| Other                                                                                | 3 (0.0%)                              | -                                      | -                                       | 2 (0.1%)                      | 1 (0.0%)                    | 15 (0.2%)                     |

**Table 6A Characteristics of the First Antidepressant Treatment Episode Among Persons with a Diagnosis of Depression**

| Characteristics                    | Canada      |           |                 |           | United States     |           | United Kingdom |           | Taiwan      |           |             |           |
|------------------------------------|-------------|-----------|-----------------|-----------|-------------------|-----------|----------------|-----------|-------------|-----------|-------------|-----------|
|                                    | Ontario     |           | Montreal Sample |           | Quebec City & Mtl |           | Boston         |           | CPRD        |           | NHIRDB      |           |
|                                    | N           | %         | N               | %         | N                 | %         | N              | %         | N           | %         | N           | %         |
| <b>All patients</b>                | 4,407       | 100%      | 1,221           | 100%      | 324               | 100%      | 1,259          | 100%      | 2,152       | 100%      | 835         | 100%      |
| <b>No treatment change</b>         | 2,383       | 54%       | 680             | 56%       | 220               | 68%       | 757            | 60%       | 1,317       | 61%       | 566         | 68%       |
| <b>Treatment change</b>            | 2,024       | 46%       | 541             | 44%       | 104               | 32%       | 502            | 40%       | 835         | 39%       | 269         | 32%       |
|                                    | <b>Mean</b> | <b>SD</b> | <b>Mean</b>     | <b>SD</b> | <b>Mean</b>       | <b>SD</b> | <b>Mean</b>    | <b>SD</b> | <b>Mean</b> | <b>SD</b> | <b>Mean</b> | <b>SD</b> |
| <b>All patients</b>                |             |           |                 |           |                   |           |                |           |             |           |             |           |
| Dose*                              | 1.3         | 1.0       | 0.9             | 0.6       | 0.9               | 0.5       | 1.3            | 0.8       | 1.0         | 0.5       | 0.7         | 0.4       |
| Duration (days)                    | 519.5       | 285.1     | 462.5           | 298.9     | 467.7             | 255.0     | 395.6          | 266.2     | 356.2       | 278.7     | 217.0       | 248.0     |
| <b>No treatment change**</b>       |             |           |                 |           |                   |           |                |           |             |           |             |           |
| Dose                               | 0.9         | 0.7       | 0.7             | 0.4       | 0.8               | 0.4       | 1.0            | 0.9       | 0.8         | 0.4       | 0.6         | 0.4       |
| Duration (days)                    | 289.1       | 309.6     | 246.3           | 290.4     | 340.9             | 243.2     | 225.7          | 212.3     | 192.8       | 239.9     | 104.7       | 179.7     |
| <b>Treatment change**</b>          |             |           |                 |           |                   |           |                |           |             |           |             |           |
| Dose                               | 1.5         | 1.0       | 1.0             | 0.6       | 1.1               | 0.6       | 1.4            | 0.8       | 1.2         | 0.6       | 0.8         | 0.4       |
| Duration (days)                    | 616.9       | 209.8     | 569.0           | 240.8     | 574.7             | 213.9     | 507.7          | 239.4     | 469.5       | 247.6     | 312.6       | 260.2     |
|                                    | <b>N</b>    | <b>%</b>  | <b>N</b>        | <b>%</b>  | <b>N</b>          | <b>%</b>  | <b>N</b>       | <b>%</b>  | <b>N</b>    | <b>%</b>  | <b>N</b>    | <b>%</b>  |
| <b>Type of changes***</b>          |             |           |                 |           |                   |           |                |           |             |           |             |           |
| Added molecule (different class)   | 796         | 18%       | 139             | 11%       | 31                | 10%       | 125            | 10%       | 125         | 6%        | 72          | 9%        |
| Added molecule (same class)        | 174         | 4%        | 22              | 2%        | 6                 | 2%        | 42             | 3%        | 54          | 3%        | 26          | 3%        |
| Dose decrease                      | 921         | 21%       | 246             | 20%       | 38                | 12%       | 151            | 12%       | 407         | 19%       | 105         | 13%       |
| Dose increase                      | 1,464       | 33%       | 387             | 32%       | 64                | 20%       | 348            | 28%       | 611         | 28%       | 171         | 20%       |
| Removed molecule (different class) | 710         | 16%       | 132             | 11%       | 26                | 8%        | 34             | 3%        | 19          | 1%        | 75          | 9%        |
| Removed molecule (same class)      | 178         | 4%        | 23              | 2%        | 5                 | 2%        | 6              | 0%        | 6           | 0%        | 28          | 3%        |
| Switch class                       | 10          | 0%        | 48              | 4%        | -                 | -         | 56             | 4%        | 70          | 3%        | 1           | 0%        |
| Switch molecule (same class)       | 5           | 0%        | 11              | 1%        | -                 | -         | 19             | 2%        | 24          | 1%        | -           | -         |

\*Dose is the proportion of the WHO recommended daily dose (dose prescribed/recommended daily dose)

\*\*Treatment change in the first antidepressant episode, defined as continuous therapy with gaps of no greater than 90 days

\*\*\*Patients can have >1 type of change in the episode of antidepressant use.



**Table 6B. Characteristics of the First Antidepressant Treatment Episode Among Persons with a Diagnosis of Chronic Pain**

| Characteristics                    | Canada      |           |                 |           | United States     |           | United Kingdom |           | Taiwan      |           |             |           |
|------------------------------------|-------------|-----------|-----------------|-----------|-------------------|-----------|----------------|-----------|-------------|-----------|-------------|-----------|
|                                    | Ontario     |           | Montreal Sample |           | Quebec City & Mtl |           | Boston         |           | CPRD        |           | NHIRDB      |           |
|                                    | N           | %         | N               | %         | N                 | %         | N              | %         | N           | %         | N           | %         |
| <b>All patients, all changes</b>   | 16045       | 100%      | 3276            | 100%      | 349               | 100%      | 2657           | 100%      | 5360        | 100%      | 6029        | 100%      |
| <b>No treatment change</b>         | 10650       | 66%       | 2220            | 68%       | 261               | 75%       | 1793           | 67%       | 4017        | 75%       | 4761        | 79%       |
| <b>Treatment change</b>            | 5395        | 34%       | 1056            | 32%       | 88                | 25%       | 864            | 33%       | 1343        | 25%       | 1268        | 21%       |
|                                    | <b>Mean</b> | <b>SD</b> | <b>Mean</b>     | <b>SD</b> | <b>Mean</b>       | <b>SD</b> | <b>Mean</b>    | <b>SD</b> | <b>Mean</b> | <b>SD</b> | <b>Mean</b> | <b>SD</b> |
| <b>All patients, all changes</b>   |             |           |                 |           |                   |           |                |           |             |           |             |           |
| Dose*                              | 0.9         | 0.7       | 0.7             | 0.5       | 0.8               | 0.6       | 1.0            | 0.8       | 0.6         | 0.5       | 0.5         | 0.4       |
| Duration (days)                    | 416.3       | 312.8     | 407.8           | 313.7     | 437.0             | 263.6     | 384.6          | 261.7     | 257.6       | 270.8     | 168.9       | 227.3     |
| <b>No treatment change**</b>       |             |           |                 |           |                   |           |                |           |             |           |             |           |
| Dose                               | 0.6         | 0.5       | 0.4             | 0.3       | 0.6               | 0.5       | 0.8            | 0.7       | 0.40        | 0.4       | 0.4         | 0.3       |
| Duration (days)                    | 198.7       | 271.4     | 202.1           | 270.2     | 300.9             | 238.6     | 247.4          | 223.3     | 122.3       | 192       | 83.6        | 154.6     |
| <b>Treatment change**</b>          |             |           |                 |           |                   |           |                |           |             |           |             |           |
| Dose                               | 1           | 0.7       | 0.8             | 0.5       | 1.0               | 0.6       | 1.1            | 0.7       | 0.7         | 0.5       | 0.5         | 0.4       |
| Duration (days)                    | 534.6       | 260.5     | 534.7           | 265.1     | 590.0             | 201.5     | 482.2          | 239.6     | 398.0       | 266.9     | 264.4       | 252.8     |
|                                    | <b>N</b>    | <b>%</b>  | <b>N</b>        | <b>%</b>  | <b>N</b>          | <b>%</b>  | <b>N</b>       | <b>%</b>  | <b>N</b>    | <b>%</b>  | <b>N</b>    | <b>%</b>  |
| <b>Type of changes***</b>          |             |           |                 |           |                   |           |                |           |             |           |             |           |
| Added molecule (different class)   | 1776        | 11%       | 267             | 8%        | 30                | 9%        | 189            | 7%        | 159         | 3%        | 245         | 4%        |
| Added molecule (same class)        | 375         | 2%        | 31              | 1%        | 5                 | 1%        | 69             | 3%        | 68          | 1%        | 90          | 1%        |
| Dose decrease                      | 2291        | 14%       | 455             | 14%       | 32                | 9%        | 243            | 9%        | 629         | 12%       | 569         | 9%        |
| Dose increase                      | 3980        | 25%       | 818             | 25%       | 58                | 17%       | 611            | 23%       | 1032        | 19%       | 809         | 13%       |
| Removed molecule (different class) | 1547        | 10%       | 245             | 7%        | 26                | 7%        | 47             | 2%        | 14          | 0%        | 262         | 4%        |
| Removed molecule (same class)      | 372         | 2%        | 32              | 1%        | 4                 | 1%        | 6              | 0%        | 7           | 0%        | 95          | 2%        |
| Switch class                       | 30          | 0%        | 120             | 4%        | -                 | -         | 92             | 3%        | 77          | 1%        | 15          | 0%        |
| Switch molecule (same class)       | 22          | 0%        | 30              | 1%        | -                 | -         | 27             | 1%        | 29          | 1%        | 4           | 0%        |

\*Dose is the proportion of the WHO recommended daily dose (dose prescribed/recommended daily dose)

\*\*Treatment change in the first antidepressant episode, defined as continuous therapy with gaps of no greater than 90 days

\*\*\*Patients can have >1 type of change in the episode of antidepressant use.

**APPENDIX****DEPRESSION****At least one ICD-9 in:**

- 311 Depressive disorder, not elsewhere classified
- 296.2 Major depressive disorder, single episode
- 296.3 Major depressive disorder, recurrent episode
- 309 Adjustment reaction
  - 309.0 Adjustment disorder with depressed mood
  - 309.1 Prolonged depressive reaction
  - 309.2 With predominant disturbance of other emotions
  - 309.3 Adjustment disorder with disturbance of conduct
  - 309.4 Adjustment disorder with mixed disturbance of emotions and conduct
  - 309.8 Other specified adjustment reactions
  - 309.9 Unspecified adjustment reaction

OR

**At least one ICD-10 in:**

- F32 Depressive episode
  - F32.0 Mild depressive episode
  - F32.1 Moderate depressive episode
  - F32.2 Severe depressive episode without psychotic symptoms
  - F32.3 Severe depressive episode with psychotic symptoms
  - F32.8 Other depressive episodes
  - F32.9 Depressive episode, unspecified
- F33 Recurrent depressive disorder
  - F33.0 Recurrent depressive disorder, current episode mild
  - F33.1 Recurrent depressive disorder, current episode moderate
  - F33.2 Recurrent depressive disorder, current episode severe without psychotic symptoms
  - F33.3 Recurrent depressive disorder, current episode severe with psychotic symptoms
  - F33.4 Recurrent depressive disorder, currently in remission
  - F33.8 Other recurrent depressive disorders
  - F33.9 Recurrent depressive disorder, unspecified
- F41.2 Mixed anxiety and depressive disorder

OR

**At least one READ code in:†:**

|         |                         |         |                                                              |
|---------|-------------------------|---------|--------------------------------------------------------------|
| E2B..00 | Depressive disorder NEC | Eu32311 | [X]Single episode of major depression and psychotic symptoms |
| Eu32z11 | [X]Depression NOS       | E113400 | Recurrent major depressive episodes, severe, with            |

|    |         |                                                 |         |                                                                 |
|----|---------|-------------------------------------------------|---------|-----------------------------------------------------------------|
| 1  | E112.14 | Endogenous depression                           | E113z00 | psychosis<br>Recurrent major depressive episode NOS             |
| 2  | E200300 | Anxiety with depression                         | E113300 | Recurrent major depressive episodes, severe, no<br>psychosis    |
| 3  |         |                                                 |         |                                                                 |
| 4  | E135.00 | Agitated depression                             | E11y200 | Atypical depressive disorder                                    |
| 5  | E204.00 | Neurotic depression reactive type               | E001300 | Presenile dementia with depression                              |
| 6  | E290.00 | Brief depressive reaction                       | Eu02z16 | [X] Senile dementia, depressed or paranoid type                 |
| 7  | 2257.00 | O/E - depressed                                 | Eu32z13 | [X]Prolonged single episode of reactive depression              |
| 8  | 1B17.00 | Depressed                                       | Eu33.14 | [X]Seasonal depressive disorder                                 |
| 9  | E11..12 | Depressive psychoses                            | Eu32314 | [X]Single episode of reactive depressive psychosis              |
| 10 | E204.11 | Postnatal depression                            | E113100 | Recurrent major depressive episodes, mild                       |
| 11 | 1465.00 | H/O: depression                                 | Eu33100 | [X]Recurrent depressive disorder, current episode<br>moderate   |
| 12 |         |                                                 |         |                                                                 |
| 13 |         |                                                 |         |                                                                 |
| 14 | 62T1.00 | Puerperal depression                            | R007z13 | [D]Postoperative depression                                     |
| 15 | Eu32z00 | [X]Depressive episode, unspecified              | Eu33000 | [X]Recurrent depressive disorder, current episode<br>mild       |
| 16 |         |                                                 |         |                                                                 |
| 17 | E2B0.00 | Postviral depression                            | Eu33314 | [X]Recurr severe episodes/psychogenic depressive<br>psychosis   |
| 18 |         |                                                 |         |                                                                 |
| 19 | Eu32z12 | [X]Depressive disorder NOS                      | E112400 | Single major depressive episode, severe, with<br>psychosis      |
| 20 |         |                                                 |         |                                                                 |
| 21 | Eu33.00 | [X]Recurrent depressive disorder                | Eu92000 | [X]Depressive conduct disorder                                  |
| 22 | E2B1.00 | Chronic depression                              | Eu33313 | [X]Recurr severe episodes/major<br>depression+psychotic symptom |
| 23 |         |                                                 |         |                                                                 |
| 24 | Eu32.00 | [X]Depressive episode                           | Eu33200 | [X]Recurr depress disorder cur epi severe without<br>psyc sympt |
| 25 |         |                                                 |         |                                                                 |
| 26 | 1B17.11 | C/O - feeling depressed                         | E112000 | Single major depressive episode, unspecified                    |
| 27 | Eu53012 | [X]Postpartum depression NOS                    | E113000 | Recurrent major depressive episodes, unspecified                |
| 28 | E112.11 | Agitated depression                             | E290z00 | Brief depressive reaction NOS                                   |
| 29 | Eu32z14 | [X] Reactive depression NOS                     | Eu33z11 | [X]Monopolar depression NOS                                     |
| 30 | E113700 | Recurrent depression                            | Eu33316 | [X]Recurrent severe episodes/reactive depressive<br>psychosis   |
| 31 |         |                                                 |         |                                                                 |
| 32 | E112.12 | Endogenous depression first episode             | E002z00 | Senile dementia with depressive or paranoid<br>features NOS     |
| 33 |         |                                                 |         |                                                                 |
| 34 | Eu32y00 | [X]Other depressive episodes                    | Eu32211 | [X]Single episode agitated depressn w/out<br>psychotic symptoms |
| 35 |         |                                                 |         |                                                                 |
| 36 | E113.11 | Endogenous depression - recurrent               | E004300 | Arteriosclerotic dementia with depression                       |
| 37 | E112.13 | Endogenous depression first episode             | E112500 | Single major depressive episode, partial or unspec<br>remission |
| 38 |         |                                                 |         |                                                                 |
| 39 | E112z00 | Single major depressive episode NOS             | Eu33z00 | [X]Recurrent depressive disorder, unspecified                   |
| 40 | Eu32.13 | [X]Single episode of reactive depression        | E002.00 | Senile dementia with depressive or paranoid<br>features         |
| 41 |         |                                                 |         |                                                                 |
| 42 | Eu34113 | [X]Neurotic depression                          | E02y300 | Drug-induced depressive state                                   |
| 43 | Eu41211 | [X]Mild anxiety depression                      | Eu33300 | [X]Recurrent depress disorder cur epi severe with<br>psyc symp  |
| 44 |         |                                                 |         |                                                                 |
| 45 | Eu34100 | [X]Dysthymia                                    | Eu33y00 | [X]Other recurrent depressive disorders                         |
| 46 | Eu34111 | [X]Depressive neurosis                          | Eu32312 | [X]Single episode of psychogenic depressive<br>psychosis        |
| 47 |         |                                                 |         |                                                                 |
| 48 | Eu33.15 | [X]SAD - Seasonal affective disorder            | E113600 | Recurrent major depressive episodes, in full<br>remission       |
| 49 |         |                                                 |         |                                                                 |
| 50 | Eu33.11 | [X]Recurrent episodes of depressive<br>reaction | E113500 | Recurrent major depressive<br>episodes,partial/unspec remission |
| 51 |         |                                                 |         |                                                                 |
| 52 | Eu33.13 | [X]Recurrent episodes of reactive<br>depression | Eu32y12 | [X]Single episode of masked depression NOS                      |
| 53 |         |                                                 |         |                                                                 |
| 54 |         |                                                 |         |                                                                 |
| 55 |         |                                                 |         |                                                                 |
| 56 |         |                                                 |         |                                                                 |
| 57 |         |                                                 |         |                                                                 |
| 58 |         |                                                 |         |                                                                 |
| 59 |         |                                                 |         |                                                                 |
| 60 |         |                                                 |         |                                                                 |

|    |                                                                    |                                                                     |
|----|--------------------------------------------------------------------|---------------------------------------------------------------------|
| 1  | Eu32.11 [X]Single episode of depressive reaction                   | E112600 Single major depressive episode, in full remission          |
| 2  | E11z200 Masked depression                                          | Eu32213 [X]Single episode vital depression w/out psychotic symptoms |
| 3  |                                                                    |                                                                     |
| 4  | Eu32100 [X]Moderate depressive episode                             | Eu33214 [X]Vital depression, recurrent without psychotic symptoms   |
| 5  |                                                                    |                                                                     |
| 6  | Eu32200 [X]Severe depressive episode without psychotic symptoms    | Eu32600 [X]Major depression, moderately severe                      |
| 7  |                                                                    |                                                                     |
| 8  | 1B1U.00 Symptoms of depression                                     | Eu32500 [X]Major depression, mild                                   |
| 9  | 1BT..00 Depressed mood                                             | Eu32700 [X]Major depression, severe without psychotic symptoms      |
| 10 |                                                                    |                                                                     |
| 11 | 1B1U.11 Depressive symptoms                                        | Eu32800 [X]Major depression, severe with psychotic symptoms         |
| 12 |                                                                    |                                                                     |
| 13 | E112.00 Single major depressive episode                            | Eu32900 [X]Single major depr ep, severe with psych, psych in remiss |
| 14 |                                                                    |                                                                     |
| 15 | Eu32400 [X]Mild depression                                         | Eu32A00 [X]Recurr major depr ep, severe with psych, psych in remiss |
| 16 |                                                                    |                                                                     |
| 17 |                                                                    |                                                                     |
| 18 | Eu32y11 [X]Atypical depression                                     | Eu32B00 [X]Antenatal depression                                     |
| 19 | E118.00 Seasonal affective disorder                                | Eu34114 [X]Persistant anxiety depression                            |
| 20 | Eu33212 [X]Major depression, recurrent without psychotic symptoms  | E112100 Single major depressive episode, mild                       |
| 21 |                                                                    |                                                                     |
| 22 | Eu33211 [X]Endogenous depression without psychotic symptoms        | E291.00 Prolonged depressive reaction                               |
| 23 |                                                                    |                                                                     |
| 24 | Eu32000 [X]Mild depressive episode                                 | Eu33315 [X]Recurrent severe episodes of psychotic depression        |
| 25 |                                                                    |                                                                     |
| 26 |                                                                    |                                                                     |
| 27 | Eu41200 [X]Mixed anxiety and depressive disorder                   | Eu32.12 [X]Single episode of psychogenic depression                 |
| 28 |                                                                    |                                                                     |
| 29 | Eu32300 [X]Severe depressive episode with psychotic symptoms       | Eu3y111 [X]Recurrent brief depressive episodes                      |
| 30 |                                                                    |                                                                     |
| 31 | Eu53011 [X]Postnatal depression NOS                                | Eu33.12 [X]Recurrent episodes of psychogenic depression             |
| 32 | E113200 Recurrent major depressive episodes, moderate              | Eu20400 [X]Post-schizophrenic depression                            |
| 33 |                                                                    |                                                                     |
| 34 | E113.00 Recurrent major depressive episode                         | E002100 Senile dementia with depression                             |
| 35 | E112200 Single major depressive episode, moderate                  | Eu33400 [X]Recurrent depressive disorder, currently in remission    |
| 36 |                                                                    |                                                                     |
| 37 | E112300 Single major depressive episode, severe, without psychosis | Eu32212 [X]Single episode major depression w/out psychotic symptoms |
| 38 |                                                                    |                                                                     |
| 39 | Eu32313 [X]Single episode of psychotic depression                  | Eu33311 [X]Endogenous depression with psychotic symptoms            |
| 40 |                                                                    |                                                                     |
| 41 |                                                                    |                                                                     |
| 42 |                                                                    |                                                                     |
| 43 |                                                                    |                                                                     |
| 44 |                                                                    |                                                                     |
| 45 |                                                                    |                                                                     |
| 46 |                                                                    |                                                                     |
| 47 |                                                                    |                                                                     |
| 48 |                                                                    |                                                                     |
| 49 |                                                                    |                                                                     |
| 50 |                                                                    |                                                                     |
| 51 |                                                                    |                                                                     |
| 52 |                                                                    |                                                                     |
| 53 |                                                                    |                                                                     |
| 54 |                                                                    |                                                                     |
| 55 |                                                                    |                                                                     |
| 56 |                                                                    |                                                                     |
| 57 |                                                                    |                                                                     |
| 58 |                                                                    |                                                                     |
| 59 |                                                                    |                                                                     |
| 60 |                                                                    |                                                                     |

**ANXIETY****At least one ICD-9 in:**

300 Anxiety, dissociative and somatoform disorders

OR

**At least one ICD-10 in:**

F40 Phobic anxiety disorders  
 F41 Other anxiety disorders (except F41.2)  
 F42 Obsessive-compulsive disorder  
 F43 Reaction to severe stress, and adjustment disorders  
 F44 Dissociative and conversion disorders  
 F45 Somatoform disorders  
 F48 Other nonpsychotic mental disorders

OR

**At least one READ code in:**

|         |                                 |         |                                              |
|---------|---------------------------------|---------|----------------------------------------------|
| 1B13.00 | Anxiousness                     | Eu42.11 | [X]Anankastic neurosis                       |
| E28..00 | Acute reaction to stress        | Eu45213 | [X]Hypochondriacal neurosis                  |
| E200111 | Panic attack                    | Eu93100 | [X]Phobic anxiety disorder of childhood      |
| E200.00 | Anxiety states                  | Eu45000 | [X]Somatization disorder                     |
| E200300 | Anxiety with depression         | E201C00 | Phantom pregnancy                            |
| E20z.11 | Nervous breakdown               | E201z12 | Ataxia - hysterical                          |
| Eu41111 | [X]Anxiety neurosis             | E283100 | Acute posttrauma stress state                |
| E202B00 | Cancer phobia                   | Eu41z11 | [X]Anxiety NOS                               |
| E205.11 | Nervous exhaustion              | E28z.00 | Acute stress reaction NOS                    |
| E202800 | Claustrophobia                  | Z4I7211 | Reducing anxiety                             |
| E200400 | Chronic anxiety                 | E29y400 | Adjustment reaction due to hospitalisation   |
| E202.00 | Phobic disorders                | Eu44.13 | [X]Hysteria                                  |
| E203100 | Obsessional neurosis            | Eu44600 | [X]Dissociative anaesthesia and sensory loss |
| E201.00 | Hysteria                        | Eu40y00 | [X]Other phobic anxiety disorders            |
| E202000 | Phobia unspecified              | E28z.13 | Stage fright                                 |
| E202C00 | Dental phobia                   | Eu46.00 | [X]Other neurotic disorders                  |
| Eu40000 | [X]Agoraphobia                  | E202600 | Acrophobia                                   |
| E29..00 | Adjustment reaction             | E28z.11 | Examination fear                             |
| E264200 | Cyclical vomiting - psychogenic | Eu41y11 | [X]Anxiety hysteria                          |
| E202100 | Agoraphobia with panic attacks  | E292312 | Specific work inhibition                     |
| E203.00 | Obsessive-compulsive disorders  | Z4I7200 | Alleviating anxiety                          |
| E205.00 | Neurasthenia - nervous debility | E202700 | Animal phobia                                |
| 1466.00 | H/O: anxiety state              | E201B00 | Compensation neurosis                        |
| E201100 | Hysterical blindness            | Eu45413 | [X]Psychogenic headache                      |
| E20y100 | Writer's cramp neurosis         | E262.00 | Psychogenic cardiovascular symptoms          |
| E264400 | Psychogenic dyspepsia           | E263.00 | Psychogenic skin symptoms                    |
| E200100 | Panic disorder                  | E283z00 | Other acute stress reaction NOS              |
| Eu41012 | [X]Panic state                  | Eu93200 | [X]Social anxiety disorder of childhood      |

|    |         |                                                        |         |                                                              |
|----|---------|--------------------------------------------------------|---------|--------------------------------------------------------------|
| 1  | E201z11 | Aphonia - hysterical                                   | Eu45400 | [X]Persistent somatoform pain disorder                       |
| 2  | E201612 | Globus hystericus                                      | Eu45212 | [X]Dysmorphophobia nondelusional                             |
| 3  | E202A0  | Fear of flying                                         | E262300 | Psychogenic cardiovascular disorder                          |
| 4  | 0       |                                                        |         |                                                              |
| 5  | Eu43100 | [X]Post - traumatic stress disorder                    | E264.00 | Psychogenic gastrointestinal tract symptoms                  |
| 6  | E26..00 | Physiological malfunction arising from mental factors  | Eu43z00 | [X]Reaction to severe stress, unspecified                    |
| 7  |         |                                                        |         |                                                              |
| 8  | E201700 | Hysterical amnesia                                     | E2D0.00 | Disturbance of anxiety and fearfulness childhood/adolescent  |
| 9  |         |                                                        |         |                                                              |
| 10 | E200z00 | Anxiety state NOS                                      | E202900 | Fear of crowds                                               |
| 11 | E200500 | Recurrent anxiety                                      | E202400 | Social phobia, fear of public speaking                       |
| 12 | E200200 | Generalised anxiety disorder                           | E261000 | Psychogenic air hunger                                       |
| 13 | E201800 | Hysterical fugue                                       | Eu43111 | [X]Traumatic neurosis                                        |
| 14 | E264000 | Psychogenic aerophagy                                  | E29y100 | Other post-traumatic stress disorder                         |
| 15 | E26z.00 | Psychosomatic disorder NOS                             | Eu45312 | [X]Da Costa's syndrome                                       |
| 16 | E20..00 | Neurotic disorders                                     | E201511 | Fit - hysterical                                             |
| 17 | Eu42.00 | [X]Obsessive - compulsive disorder                     | Eu40z00 | [X]Phobic anxiety disorder, unspecified                      |
| 18 | E206.00 | Depersonalisation syndrome                             | E261z00 | Psychogenic respiratory symptom NOS                          |
| 19 | Eu41.00 | [X]Other anxiety disorders                             | E201400 | Hysterical paralysis                                         |
| 20 | E203000 | Compulsive neurosis                                    | Eu45111 | [X]Undifferentiated psychosomatic disorder                   |
| 21 | 1B13.11 | Anxiousness - symptom                                  | Eu44400 | [X]Dissociative motor disorders                              |
| 22 | E202E00 | Fear of pregnancy                                      | Eu44.11 | [X]Conversion hysteria                                       |
| 23 | E293000 | Adjustment reaction with aggression                    | E2D0z00 | Disturbance anxiety and fearfulness childhood/adolescent NOS |
| 24 |         |                                                        |         |                                                              |
| 25 | E292000 | Separation anxiety disorder                            | E2D0000 | Childhood and adolescent overanxiousness disturbance         |
| 26 |         |                                                        |         |                                                              |
| 27 |         |                                                        |         |                                                              |
| 28 | Eu41011 | [X]Panic attack                                        | E29y200 | Adjustment reaction with physical symptoms                   |
| 29 | E200000 | Anxiety state unspecified                              | Eu41112 | [X]Anxiety reaction                                          |
| 30 | Eu40z11 | [X]Phobia NOS                                          | E293100 | Adjustment reaction with antisocial behaviour                |
| 31 | Eu45200 | [X]Hypochondriacal disorder                            | Eu45y14 | [X]Psychogenic torticollis                                   |
| 32 | E29y300 | Elective mutism due to an adjustment reaction          | Eu45414 | [X]Somatoform pain disorder                                  |
| 33 |         |                                                        |         |                                                              |
| 34 |         |                                                        |         |                                                              |
| 35 | Eu41211 | [X]Mild anxiety depression                             | Eu43211 | [X]Culture shock                                             |
| 36 | Eu43015 | [X]Psychic shock                                       | Eu43011 | [X]Acute crisis reaction                                     |
| 37 | Eu41000 | [X]Panic disorder [episodic paroxysmal anxiety]        | E29z.00 | Adjustment reaction NOS                                      |
| 38 |         |                                                        |         |                                                              |
| 39 | Eu46100 | [X]Depersonalization - derealization syndrome          | E264.11 | Globus abdominalis                                           |
| 40 |         |                                                        |         |                                                              |
| 41 | Eu40.00 | [X]Phobic anxiety disorders                            | E261.00 | Psychogenic respiratory symptoms                             |
| 42 | Eu46011 | [X]Fatigue syndrome                                    | Eu45412 | [X]Psychogenic backache                                      |
| 43 | Eu40200 | [X]Specific (isolated) phobias                         | E283.00 | Other acute stress reactions                                 |
| 44 | E202.12 | Phobic anxiety                                         | Eu42y00 | [X]Other obsessive-compulsive disorders                      |
| 45 | Eu41100 | [X]Generalized anxiety disorder                        | E20y200 | Other occupational neurosis                                  |
| 46 | E202D0  | Fear of death                                          | Eu44300 | [X]Trance and possession disorders                           |
| 47 | 0       |                                                        |         |                                                              |
| 48 |         |                                                        |         |                                                              |
| 49 | Eu43012 | [X]Acute reaction to stress                            | Eu44100 | [X]Dissociative fugue                                        |
| 50 | Eu43.00 | [X]Reaction to severe stress, and adjustment disorders | Eu44y12 | [X]Multiple personality                                      |
| 51 |         |                                                        |         |                                                              |
| 52 | Eu40213 | [X]Claustrophobia                                      | E201z13 | Ganser's syndrome - hysterical                               |
| 53 | Eu43200 | [X]Adjustment disorders                                | E278.00 | Psychalgia                                                   |
| 54 | Eu46y13 | [X]Occupational neurosis, including writer's cramp     | Eu44000 | [X]Dissociative amnesia                                      |
| 55 |         |                                                        |         |                                                              |
| 56 |         |                                                        |         |                                                              |
| 57 | Eu44511 | [X]Pseudoseizures                                      | Eu45300 | [X]Somatoform autonomic dysfunction                          |
| 58 | Eu40100 | [X]Social phobias                                      | Eu43213 | [X]Hospitalism in children                                   |
| 59 |         |                                                        |         |                                                              |
| 60 |         |                                                        |         |                                                              |

|    |         |                                                             |         |                                                          |
|----|---------|-------------------------------------------------------------|---------|----------------------------------------------------------|
| 1  | Eu43000 | [X]Acute stress reaction                                    | E29y.00 | Other adjustment reactions                               |
| 2  | 146G.00 | H/O: agoraphobia                                            | E201000 | Hysteria unspecified                                     |
| 3  | 1B1V.00 | C/O - panic attack                                          | E261500 | Psychogenic aphonia                                      |
| 4  | Eu41200 | [X]Mixed anxiety and depressive disorder                    | E20y.00 | Other neurotic disorders                                 |
| 5  | E280.00 | Acute panic state due to acute stress reaction              | E2z..00 | Neuroses or other mental disorder NOS                    |
| 6  |         |                                                             |         |                                                          |
| 7  | Eu44411 | [X]Psychogenic aphonia                                      | E281.00 | Acute fugue state due to acute stress reaction           |
| 8  | Eu45500 | [X]Globus pharyngeus                                        | Eu40112 | [X]Social neurosis                                       |
| 9  | Eu40300 | [X]Needle phobia                                            | E20yz00 | Other neurotic disorder NOS                              |
| 10 | Eu40214 | [X]Simple phobia                                            | E201900 | Multiple personality                                     |
| 11 | Eu45316 | [X]Psychogenic cough                                        | Eu45317 | [X]Psychogenic diarrhoea                                 |
| 12 | Eu45322 | [X]Psychogenic hyperventilat                                | E28..11 | Combat fatigue                                           |
| 13 | E202200 | Agoraphobia without mention of panic attacks                | E260.00 | Psychogenic musculoskeletal symptoms                     |
| 14 |         |                                                             |         |                                                          |
| 15 | 2258.00 | O/E - anxious                                               | Eu45311 | [X]Cardiac neurosis                                      |
| 16 | E202z00 | Phobic disorder NOS                                         | Eu41300 | [X]Other mixed anxiety disorders                         |
| 17 | E20z.00 | Neurotic disorder NOS                                       | Eu46y00 | [X]Other specified neurotic disorders                    |
| 18 | Eu40012 | [X]Panic disorder with agoraphobia                          | E265200 | Psychogenic dysmenorrhea                                 |
| 19 | E262z00 | Psychogenic cardiovascular symptom NOS                      | Eu46y16 | [X]Psychogenic syncope                                   |
| 20 | E260z00 | Psychogenic musculoskeletal symptoms NOS                    | E201200 | Hysterical deafness                                      |
| 21 | Eu34114 | [X]Persistant anxiety depression                            | E278200 | Psychogenic backache                                     |
| 22 | E263z00 | Psychogenic skin symptoms NOS                               | E294.00 | Adjustment reaction with disturbance emotion and conduct |
| 23 |         |                                                             |         |                                                          |
| 24 | E262200 | Neurocirculatory asthenia                                   | E201611 | Astasia - abasia, hysterical                             |
| 25 | E262000 | Cardiac neurosis                                            | Eu44y11 | [X]Ganser's syndrome                                     |
| 26 | E20y000 | Somatization disorder                                       | Eu45y11 | [X]Psychogenic dysmenorrhoea                             |
| 27 | E264300 | Psychogenic diarrhoea                                       | E203.11 | Anancastic neurosis                                      |
| 28 | E201600 | Other conversion disorder                                   | Eu46y12 | [X]Dhat syndrome                                         |
| 29 | E261100 | Psychogenic cough                                           | Eu45320 | [X]Psychogenic flatulence                                |
| 30 | E282.00 | Acute stupor state due to acute stress reaction             | E261200 | Psychogenic hiccough                                     |
| 31 |         |                                                             |         |                                                          |
| 32 | E203z00 | Obsessive-compulsive disorder NOS                           | E260000 | Psychogenic paralysis                                    |
| 33 | E292z00 | Adjustment reaction with disturbance of other emotion NOS   | E292y00 | Adjustment reaction with mixed disturbance of emotion    |
| 34 |         |                                                             |         |                                                          |
| 35 | E264500 | Psychogenic constipation                                    | Eu45z00 | [X]Somatoform disorder, unspecified                      |
| 36 | E263000 | Psychogenic pruritus                                        | Eu44z00 | [X]Dissociative [conversion] disorder, unspecified       |
| 37 |         |                                                             |         |                                                          |
| 38 | E202300 | Social phobia, fear of eating in public                     | Eu46z00 | [X]Neurotic disorder, unspecified                        |
| 39 | E293.00 | Adjustment reaction with predominant disturbance of conduct | E2y..00 | Other specified neuroses or other mental disorders       |
| 40 |         |                                                             |         |                                                          |
| 41 | E201500 | Hysterical seizures                                         | Eu44611 | [X]Psychogenic deafness                                  |
| 42 | Eu45324 | [X]Psychogenic IBS                                          | Eu41113 | [X]Anxiety state                                         |
| 43 | Eu46000 | [X]Neurasthenia                                             | Eu45314 | [X]Neurocirculatory asthenia                             |
| 44 | E202.11 | Social phobic disorders                                     | Eu44.12 | [X]Conversion reaction                                   |
| 45 | Eu45y13 | [X]Psychogenic pruritis                                     | Eu45319 | [X]Psychogenic dysuria                                   |
| 46 | Eu45318 | [X]Psychogenic dyspepsia                                    | E29y000 | Concentration camp syndrome                              |
| 47 | Eu40011 | [X]Agoraphobia without history of panic disorder            | Eu45321 | [X]Psychogenic hiccough                                  |
| 48 |         |                                                             |         |                                                          |
| 49 | Eu44y13 | [X]Psychogenic confusion                                    | E278000 | Psychogenic pain unspecified                             |
| 50 | Eu45323 | [X]Psychogenic freq micturit                                | E278z00 | Psychalgia NOS                                           |
| 51 | Eu51511 | [X]Dream anxiety disorder                                   | Eu45411 | [X]Psychalgia                                            |
| 52 | Eu93000 | [X]Separation anxiety disorder of childhood                 | E292200 | Early adult emancipation disorder                        |
| 53 | Eu45.00 | [X]Somatoform disorders                                     | E265300 | Psychogenic dysuria                                      |
| 54 | Eu40212 | [X]Animal phobias                                           | Eu44200 | [X]Dissociative stupor                                   |
| 55 |         |                                                             |         |                                                          |
| 56 |         |                                                             |         |                                                          |
| 57 |         |                                                             |         |                                                          |
| 58 |         |                                                             |         |                                                          |
| 59 |         |                                                             |         |                                                          |
| 60 |         |                                                             |         |                                                          |

|    |         |                                                              |         |                                                              |
|----|---------|--------------------------------------------------------------|---------|--------------------------------------------------------------|
| 1  | Eu42200 | [X]Mixed obsessional thoughts and acts                       | E260100 | Psychogenic torticollis                                      |
| 2  | E202500 | Social phobia, fear of public washing                        | E292400 | Adjustment reaction with anxious mood                        |
| 3  | Eu44412 | [X]Psychogenic dysphonia                                     | E20y011 | Briquet's disorder                                           |
| 4  | 225J.00 | O/E - panic attack                                           | Eu44500 | [X]Dissociative convulsions                                  |
| 5  | Eu45z11 | [X]Psychosomatic disorder NOS                                | Eu45100 | [X]Undifferentiated somatoform disorder                      |
| 6  | E29y500 | Other adjustment reaction with withdrawal                    | E292500 | Culture shock                                                |
| 7  | E261300 | Psychogenic hyperventilation                                 | Eu45012 | [X]Briquet's syndrome                                        |
| 8  | E265100 | Psychogenic vaginismus                                       | Eu93y12 | [X]Childhood overanxious disorder                            |
| 9  | E283000 | Acute situational disturbance                                | Eu46y14 | [X]Psychasthenia                                             |
| 10 | Eu42000 | [X]Predominantly obsessional thoughts or ruminations         | Eu45y00 | [X]Other somatoform disorders                                |
| 11 |         |                                                              |         |                                                              |
| 12 | Eu05400 | [X]Organic anxiety disorder                                  | E292300 | Specific academic or work inhibition                         |
| 13 | E28z.12 | Flying phobia                                                | E26y.00 | Other psychogenic malfunction                                |
| 14 | Eu45y12 | [X]Globus hystericus                                         | Z4I7100 | Recognising anxiety                                          |
| 15 | Eu46z11 | [X]Neurosis NOS                                              | Eu45313 | [X]Gastric neurosis                                          |
| 16 | Eu43014 | [X]Crisis state                                              | Eu44y00 | [X]Other dissociative [conversion] disorders                 |
| 17 | Eu43y00 | [X]Other reactions to severe stress                          | E293200 | Adjustment reaction with destructiveness                     |
| 18 | Eu42.12 | [X]Obsessive-compulsive neurosis                             | Eu45215 | [X]Nosophobia                                                |
| 19 | Eu42100 | [X]Predominantly compulsive acts [obsessional rituals]       | E292311 | Specific academic or work inhibition                         |
| 20 |         |                                                              |         |                                                              |
| 21 | Eu44.00 | [X]Dissociative [conversion] disorders                       | Eu40z12 | [X]Phobic state NOS                                          |
| 22 | Z4I7.00 | Acknowledging anxiety                                        | Eu40211 | [X]Acrophobia                                                |
| 23 | Eu42z00 | [X]Obsessive-compulsive disorder, unspecified                | Eu44y14 | [X]Psychogenic twilight state                                |
| 24 |         |                                                              |         |                                                              |
| 25 | E292100 | Adolescent emancipation disorder                             | E265.00 | Psychogenic genitourinary tract symptoms                     |
| 26 | E201z00 | Hysteria NOS                                                 | Eu43013 | [X]Combat fatigue                                            |
| 27 | E261400 | Psychogenic yawning                                          | E264z00 | Psychogenic gastrointestinal tract symptom NOS               |
| 28 |         |                                                              |         |                                                              |
| 29 | E29yz00 | Other adjustment reactions NOS                               | E20y300 | Psychasthenic neurosis                                       |
| 30 | E201A0  | Dissociative reaction unspecified                            | E265z00 | Psychogenic genitourinary tract symptom NOS                  |
| 31 | 0       |                                                              |         |                                                              |
| 32 | E201300 | Hysterical tremor                                            | Eu44700 | [X]Mixed dissociative [conversion] disorders                 |
| 33 | Eu45011 | [X]Multiple psychosomatic disorder                           | E267.00 | Psychogenic symptom of special sense organ                   |
| 34 | Eu4..00 | [X]Neurotic, stress - related and somoform disorders         | Eu46y15 | [X]Psychasthenia neurosis                                    |
| 35 |         |                                                              |         |                                                              |
| 36 | Eu41z00 | [X]Anxiety disorder, unspecified                             | Eu45325 | [X]Psychogenic pylorospasm                                   |
| 37 | E284.00 | Stress reaction causing mixed disturbance of emotion/conduct | 1B13.12 | Anxious                                                      |
| 38 |         |                                                              |         |                                                              |
| 39 | Eu41y00 | [X]Other specified anxiety disorders                         | E26yz00 | Other psychogenic malfunction NOS                            |
| 40 | E292.00 | Adjustment reaction, predominant disturbance other emotions  | Eu45511 | [X]Globus hystericus                                         |
| 41 |         |                                                              |         |                                                              |
| 42 | E293z00 | Adjustment reaction with predominant disturbance conduct NOS | Eu46y11 | [X]Briquet's disorder                                        |
| 43 | Eu45013 | [X]Briquet's disorder                                        | Eu43400 | [X]Chron post-traumatic stress disorder follow military comb |
| 44 |         |                                                              | Eu43300 | [X]Acute post-traumatic stress disorder follow military comb |
| 45 |         |                                                              |         |                                                              |
| 46 |         |                                                              |         |                                                              |
| 47 |         |                                                              |         |                                                              |
| 48 |         |                                                              |         |                                                              |
| 49 |         |                                                              |         |                                                              |
| 50 |         |                                                              |         |                                                              |
| 51 |         |                                                              |         |                                                              |
| 52 |         |                                                              |         |                                                              |
| 53 |         |                                                              |         |                                                              |
| 54 |         |                                                              |         |                                                              |
| 55 |         |                                                              |         |                                                              |
| 56 |         |                                                              |         |                                                              |
| 57 |         |                                                              |         |                                                              |
| 58 |         |                                                              |         |                                                              |
| 59 |         |                                                              |         |                                                              |
| 60 |         |                                                              |         |                                                              |



**MENTAL DISORDERS****At least one ICD-9 in:**

|     |                                                |
|-----|------------------------------------------------|
| 295 | Schizophrenic disorders                        |
| 296 | Episodic mood disorders (except 296.2 & 296.3) |
| 297 | Delusional disorders                           |
| 298 | Other nonorganic psychoses                     |
| 299 | Pervasive developmental disorders              |
| 301 | Personality disorders                          |

OR

**At least one ICD-10 in:**

|     |                                                                                  |
|-----|----------------------------------------------------------------------------------|
| F20 | Schizophrenia                                                                    |
| F21 | Schizotypal disorder                                                             |
| F22 | Delusional disorders                                                             |
| F23 | Brief psychotic disorder                                                         |
| F24 | Shared psychotic disorder                                                        |
| F25 | Schizoaffective disorders                                                        |
| F28 | Other psychotic disorder not due to a substance or known physiological condition |
| F29 | Unspecified psychosis not due to a substance or known physiological condition    |
| F30 | Manic episode                                                                    |
| F31 | Bipolar disorder                                                                 |
| F34 | Persistent mood [affective] disorders                                            |
| F39 | Unspecified mood [affective] disorder                                            |

OR

**At least one READ code in:**

|         |                                               |         |                                                              |
|---------|-----------------------------------------------|---------|--------------------------------------------------------------|
| E104.00 | Acute schizophrenic episode                   | Eu6y100 | [X]Intent product/feign of symptom/disab eith physical/psych |
| Eu2z.11 | [X]Psychosis NOS                              | Eu50400 | [X]Overeating associated with other psychological disturbncs |
| E21z.11 | Psychopathic personality                      | Eu60711 | [X]Asthenic personality disorder                             |
| E10..00 | Schizophrenic disorders                       | E04z.00 | Chronic organic psychosis NOS                                |
| E2F3z00 | Speech or language developmental disorder NOS | Eu34z00 | [X]Persistent mood affective disorder, unspecified           |
| E214100 | Obsessional personality                       | Eu6z.00 | [X]Unspecified disorder of adult personality and behaviour   |
| E21y500 | Immature personality disorder                 | Eu10600 | [X]Mental and behav dis due to use alcohol: amnesic syndrome |
| E103.00 | Paranoid schizophrenia                        | E214.11 | Anancastic personality                                       |
| Eu31.11 | [X]Manic-depressive illness                   | Eu60800 | [X]Addictive personality                                     |
| E2A1200 | Change in personality                         | Eu53000 | [X]Mild mental/behav disorder assoc with the puerperium NEC  |
| 1B1E.00 | Hallucinations                                | Eu21.15 | [X]Prodromal schizophrenia                                   |
| 1BH..00 | Delusions                                     | Eu53100 | [X]Severe mental and behav disorder assoc wth puerperium NEC |
| ZV40.13 | [V]Psychological problems                     | Eu22y11 | [X]Delusional dysmorphophobia                                |

|    |         |                                                                 |         |                                                                 |
|----|---------|-----------------------------------------------------------------|---------|-----------------------------------------------------------------|
| 1  | E21..00 | Personality disorders                                           | Eu25112 | [X]Schizophreniform psychosis, depressive type                  |
| 2  | Eu22011 | [X]Paranoid psychosis                                           | E141100 | Residual disintegrative psychoses                               |
| 3  | E03y300 | Unspecified puerperal psychosis                                 | Eu13.00 | [X]Mental and behavioural dis due use<br>sedatives/hypnotics    |
| 4  | E107.00 | Schizo-affective schizophrenia                                  | Eu05y00 | [X]Oth sp mental disord brain<br>damag/dysfunction/physcal disd |
| 5  |         |                                                                 | E11z.00 | Other and unspecified affective psychoses                       |
| 6  | R001.00 | [D]Hallucinations                                               | 1S04.00 | C/O - illusions seen                                            |
| 7  | E11..12 | Depressive psychoses                                            | E2z..00 | Neuroses or other mental disorder NOS                           |
| 8  | E21y711 | Neurotic personality                                            | Eu11000 | [X]Mental & behav dis due to use opioids: acute<br>intoxication |
| 9  | Eu30000 | [X]Hypomania                                                    | Eu60z00 | [X]Personality disorder, unspecified                            |
| 10 |         |                                                                 | Eu34.00 | [X]Persistent mood affective disorders                          |
| 11 | E00z.00 | Senile or presenile psychoses NOS                               | E110300 | Single manic episode, severe without mention of<br>psychosis    |
| 12 | Eu63300 | [X]Trichotillomania                                             | Eu15.00 | [X]Mental & behav disorder due other stimulants inc<br>caffein  |
| 13 | E212.00 | Schizoid personality disorder                                   | E14..00 | Psychoses with origin in childhood                              |
| 14 |         |                                                                 | Eu20100 | [X]Hebephrenic schizophrenia                                    |
| 15 | E11z100 | Rebound mood swings                                             | 1BH0.00 | Delusion of persecution                                         |
| 16 | E2F3.00 | Speech or language developmental disorder                       | Eu60400 | [X]Histrionic personality disorder                              |
| 17 | E...00  | Mental disorders                                                | E107200 | Chronic schizo-affective schizophrenia                          |
| 18 | E13z.11 | Psychotic episode NOS                                           | E215000 | Unspecified histrionic personality disorder                     |
| 19 | E114.00 | Bipolar affective disorder, currently manic                     | Eu10000 | [X]Mental & behav dis due to use alcohol: acute<br>intoxication |
| 20 | E215200 | Emotionally unstable personality                                | Eu23300 | [X]Other acute predominantly delusional psychotic<br>disorders  |
| 21 | E121.00 | Chronic paranoid psychosis                                      | Eu84z00 | [X]Pervasive developmental disorder, unspecified                |
| 22 | E100200 | Chronic schizophrenic                                           | Eu13200 | [X]Mental and behav dis due to seds/hypntcs:<br>dependence synd |
| 23 |         |                                                                 | Eu81y00 | [X]Other developmental disorders of scholastic skills           |
| 24 |         |                                                                 | E100400 | Acute exacerbation of chronic schizophrenia                     |
| 25 | E12..00 | Paranoid states                                                 | Eu23y00 | [X]Other acute and transient psychotic disorders                |
| 26 |         |                                                                 | Eu30z00 | [X]Manic episode, unspecified                                   |
| 27 | 285..11 | Psychotic condition, insight present                            | Eu8y.00 | [X]Other disorders of psychological development                 |
| 28 | E011000 | Korsakov's alcoholic psychosis                                  | Eu31600 | [X]Bipolar affective disorder, current episode mixed            |
| 29 |         |                                                                 | Eu60215 | [X]Sociopathic personality disorder                             |
| 30 | E216.00 | Inadequate personality disorder                                 | Eu19200 | [X]Mental and behav dis mlti/oth psych sbs:<br>dependence syndr |
| 31 | E115.00 | Bipolar affective disorder, currently depressed                 | ZV40z00 | [V]Unspecified mental or behavioural problem                    |
| 32 | Eu30z11 | [X]Mania NOS                                                    | Eu0z.00 | [X]Unspecified organic or symptomatic mental<br>disorder        |
| 33 | Eu31500 | [X]Bipolar affect dis cur epi severe depres with<br>psyc symp   | Eu80y00 | [X]Other developmental disorders of speech and<br>language      |
| 34 |         |                                                                 | E111z00 | Recurrent manic episode NOS                                     |
| 35 | E215.11 | Hysterical personality disorders                                | E111100 | Recurrent manic episodes, mild                                  |
| 36 | Eu22015 | [X]Paranoia                                                     | E114200 | Bipolar affective disorder, currently manic, moderate           |
| 37 | Eu10.00 | [X]Mental and behavioural disorders due to<br>use of alcohol    | Eu6y200 | [X]Munchausen's by proxy                                        |
| 38 | E210.00 | Paranoid personality disorder                                   |         |                                                                 |
| 39 |         |                                                                 | L184.00 | Mental disorders in pregnancy, childbirth and the<br>puerperium |
| 40 | Eu3..00 | [X]Mood - affective disorders                                   | Eu33300 | [X]Recurrent depress disorder cur epi severe with psyc<br>symp  |
| 41 | 146..00 | H/O: psychiatric disorder                                       | Eu24.12 | [X] Induced paranoid disorder                                   |
| 42 |         |                                                                 | Eu11.00 | [X]Mental and behavioural disorders due to use of<br>opioids    |
| 43 | Eu80.00 | [X]Specific developmental disorders of speech<br>and language   | Eu02z12 | [X] Presenile psychosis NOS                                     |
| 44 | 1464.00 | H/O: schizophrenia                                              | Eu14100 | [X]Mental and behav dis due to use of cocaine:                  |
| 45 | E213.11 | Aggressive personality                                          |         |                                                                 |
| 46 | Eu83.00 | [X]Mixed specific developmental disorders                       |         |                                                                 |
| 47 | Eu80z00 | [X]Developmental disorder of speech and<br>language unspecified |         |                                                                 |
| 48 | Eu81z00 | [X]Developmental disorder of scholastic skills,<br>unspecified  |         |                                                                 |
| 49 | Eu05y11 | [X]Epileptic psychosis NOS                                      |         |                                                                 |
| 50 |         |                                                                 |         |                                                                 |
| 51 | Eu31.12 | [X]Manic-depressive psychosis                                   |         |                                                                 |
| 52 | Eu31.00 | [X]Bipolar affective disorder                                   |         |                                                                 |
| 53 |         |                                                                 |         |                                                                 |
| 54 | Eu84.00 | [X]Pervasive developmental disorders                            |         |                                                                 |
| 55 | Eu0..00 | Organic psychotic conditions                                    |         |                                                                 |

|    |         |                                                              |         |                                                              |
|----|---------|--------------------------------------------------------------|---------|--------------------------------------------------------------|
| 1  | Eu82.00 | [X]Specific developmental disorder of motor function         | Eu22013 | harmful use<br>[X]Paraphrenia - late                         |
| 2  |         |                                                              |         |                                                              |
| 3  | E132.00 | Reactive confusion                                           | Eu84y00 | [X]Other pervasive developmental disorders                   |
| 4  | Eu60300 | [X]Emotionally unstable personality disorder                 | E101z00 | Hebephrenic schizophrenia NOS                                |
| 5  | E10z.00 | Schizophrenia NOS                                            | Eu62000 | [X]Enduring personality change after catastrophic experience |
| 6  |         |                                                              |         |                                                              |
| 7  | Eu60600 | [X]Anxious [avoidant] personality disorder                   | 1S40.00 | Dysphoric mood                                               |
| 8  | E130.00 | Reactive depressive psychosis                                | Eu06013 | [X]Limbic epilepsy personality                               |
| 9  | E11..11 | Bipolar psychoses                                            | Eu30212 | [X]Mania with mood-incongruent psychotic symptoms            |
| 10 | Eu0z.12 | [X]Symptomatic psychosis NOS                                 | Eu60014 | [X]Sensitive paranoid personality disorder                   |
| 11 | E103z00 | Paranoid schizophrenia NOS                                   | E216.11 | Asthenic personality                                         |
| 12 | Eu25.00 | [X]Schizoaffective disorders                                 | Eu66z00 | [X]Psychosexual development disorder, unspecified            |
| 13 | Eu30.11 | [X]Bipolar disorder, single manic episode                    | Eu22z00 | [X]Persistent delusional disorder, unspecified               |
| 14 | E2...00 | Neurotic, personality and other nonpsychotic disorders       | Eu20y00 | [X]Other schizophrenia                                       |
| 15 |         |                                                              |         |                                                              |
| 16 | Eu...00 | [X]Mental and behavioural disorders                          | E2A..00 | Nonpsychotic mental disorders following organic brain damage |
| 17 |         |                                                              |         |                                                              |
| 18 | Eu34112 | [X]Depressive personality disorder                           | Eu14500 | [X]Mental & behav dis due to use cocaine: psychotic disorder |
| 19 |         |                                                              |         |                                                              |
| 20 | E211200 | Depressive personality disorder                              | Eu14000 | [X]Mental & behav dis due to use cocaine: acute intoxication |
| 21 |         |                                                              |         |                                                              |
| 22 | E03y000 | Organic delusional syndrome                                  | Eu60y00 | [X]Other specific personality disorders                      |
| 23 | E107z00 | Schizo-affective schizophrenia NOS                           | Eu60z12 | [X]Pathological personality NOS                              |
| 24 | Eu12.00 | [X]Mental and behavioural disorders due to use cannabinoids  | E10yz00 | Other schizophrenia NOS                                      |
| 25 |         |                                                              |         |                                                              |
| 26 | Eu19.00 | [X]Men & behav disorder multiple drug use/psychoactive subst | E117000 | Unspecified bipolar affective disorder, unspecified          |
| 27 |         |                                                              |         |                                                              |
| 28 | Ez...00 | Mental disorders NOS                                         | Eu60y13 | [X]Immature personality disorder                             |
| 29 | Eu25100 | [X]Schizoaffective disorder, depressive type                 | Eu21.16 | [X]Pseudoneurotic schizophrenia                              |
| 30 | E011100 | Korsakov's alcoholic psychosis with peripheral neuritis      | Eu15500 | [X]Mental/behav dis oth stims inc caffeine: psychotic dis    |
| 31 |         |                                                              |         |                                                              |
| 32 | Eu22012 | [X]Paranoid state                                            | Eu23011 | [X]Bouffee delirante                                         |
| 33 | Eu2z.00 | [X]Unspecified nonorganic psychosis                          | Eu20011 | [X]Paraphrenic schizophrenia                                 |
| 34 | 146D.00 | H/O: manic depressive disorder                               | Eu05z00 | [X]Unspec mental disorder brain damag/dysfunction/physcal dr |
| 35 |         |                                                              |         |                                                              |
| 36 | E11y000 | Unspecified manic-depressive psychoses                       | E2y..00 | Other specified neuroses or other mental disorders           |
| 37 | Eu10611 | [X]Korsakov's psychosis, alcohol induced                     | Eu18000 | [X]Mental & behav dis due vol solvents: acute intoxication   |
| 38 |         |                                                              |         |                                                              |
| 39 | Eu23200 | [X]Acute schizophrenia-like psychotic disorder               | Eu60.00 | [X]Specific personality disorders                            |
| 40 | Eu24.13 | [X]Induced psychotic disorder                                | E110400 | Single manic episode, severe, with psychosis                 |
| 41 | R001400 | [D]Visual hallucinations                                     | Eu34y00 | [X]Other persistent mood affective disorders                 |
| 42 | Eu32300 | [X]Severe depressive episode with psychotic symptoms         | Eu22y12 | [X]Involutional paranoid state                               |
| 43 |         |                                                              |         |                                                              |
| 44 | R001000 | [D]Hallucinations, auditory                                  | Eu16.00 | [X]Mental and behavioural disorders due to use hallucinogens |
| 45 |         |                                                              |         |                                                              |
| 46 | Eu30.00 | [X]Manic episode                                             | Eu14200 | [X]Mental and behav dis due to use cocaine: dependence syndr |
| 47 |         |                                                              |         |                                                              |
| 48 | E211100 | Hypomanic personality disorder                               | Eu52800 | [X]Erotomania                                                |
| 49 | Eu10500 | [X]Mental & behav dis due to use alcohol: psychotic disorder | Eu12100 | [X]Mental and behav dis due to use cannabinoids: harmful use |
| 50 |         |                                                              |         |                                                              |
| 51 | 225E.00 | O/E - paranoid delusions                                     | Eu60y16 | [X]Psychoneurotic personality disorder                       |
| 52 | Eu45211 | [X]Body dysmorphic disorder                                  | E123.11 | Folie a deux                                                 |
| 53 | E211300 | Cyclothymic personality disorder                             | Eu11500 | [X]Mental & behav dis due to use opioids: psychotic disorder |
| 54 |         |                                                              |         |                                                              |
| 55 | E12z.00 | Paranoid psychosis NOS                                       | Eu3y000 | [X]Other single mood affective disorders                     |
| 56 | 146H.00 | H/O: psychosis                                               | Eu31y12 | [X]Recurrent manic episodes                                  |
| 57 | E115.11 | Manic-depressive - now depressed                             | E02y.00 | Other drug psychoses                                         |
| 58 | Eu30100 | [X]Mania without psychotic symptoms                          | Eu19300 | [X]Mental and behav dis mlti/oth psychoa sbs:                |
| 59 |         |                                                              |         |                                                              |

|    |         |                                                              |  |         |                                                              |
|----|---------|--------------------------------------------------------------|--|---------|--------------------------------------------------------------|
| 1  | E11..00 | Affective psychoses                                          |  |         | withdrwl state                                               |
| 2  | E110100 | Single manic episode, mild                                   |  | Eu24.00 | [X]Induced delusional disorder                               |
| 3  |         |                                                              |  | E103300 | Acute exacerbation of subchronic paranoid schizophrenia      |
| 4  | E120.00 | Simple paranoid state                                        |  | Eu84511 | [X]Autistic psychopathy                                      |
| 5  | E212z00 | Schizoid personality disorder NOS                            |  | E00y.11 | Presbyophrenic psychosis                                     |
| 6  | E117.00 | Unspecified bipolar affective disorder                       |  | E211z00 | Affective personality disorder NOS                           |
| 7  | E13z.00 | Nonorganic psychosis NOS                                     |  | Eu25012 | [X]Schizophreniform psychosis, manic type                    |
| 8  | E122.00 | Paraphrenia                                                  |  | Eu60500 | [X]Anankastic personality disorder                           |
| 9  | E211.00 | Affective personality disorder                               |  | 225F.00 | O/E - delusion of persecution                                |
| 10 | E133.00 | Acute paranoid reaction                                      |  | Eu32312 | [X]Single episode of psychogenic depressive psychosis        |
| 11 | F481K00 | Visual hallucinations                                        |  | Eu18200 | [X]Mental and behav dis due to vol solvents: dependence synd |
| 12 |         |                                                              |  | E14z.00 | Child psychosis NOS                                          |
| 13 | E21z.00 | Personality disorder NOS                                     |  | Eu06y00 | [X]Oth organ personality behav disorders brain dis dam dysf  |
| 14 | E00y.00 | Other senile and presenile organic psychoses                 |  | E22y500 | Nymphomania                                                  |
| 15 |         |                                                              |  | E103400 | Acute exacerbation of chronic paranoid schizophrenia         |
| 16 | E100000 | Unspecified schizophrenia                                    |  | Eu60y14 | [X]Narcissistic personality disorder                         |
| 17 | E115000 | Bipolar affective disorder, currently depressed, unspecified |  | Eu62013 | [X]Personality change aft prolong captiv+possib/being killed |
| 18 | E1...00 | Non-organic psychoses                                        |  | E100z00 | Simple schizophrenia NOS                                     |
| 19 | E21yz00 | Other personality disorder NOS                               |  | Ryu5300 | [X]Other hallucinations                                      |
| 20 |         |                                                              |  | Eu31y00 | [X]Other bipolar affective disorders                         |
| 21 | E211000 | Unspecified affective personality disorder                   |  | Eu84314 | [X]Symbiotic psychosis                                       |
| 22 | E01..00 | Alcoholic psychoses                                          |  | Eu20111 | [X]Disorganised schizophrenia                                |
| 23 | E02..00 | Drug psychoses                                               |  | R001100 | [D]Hallucinations, gustatory                                 |
| 24 | E13y.00 | Other reactive psychoses                                     |  | E116400 | Mixed bipolar affective disorder, severe, with psychosis     |
| 25 | E13y.00 | Other reactive psychoses                                     |  | Eu21.12 | [X]Borderline schizophrenia                                  |
| 26 | E114300 | Bipolar affect disord, currently manic, severe, no psychosis |  | E11z000 | Unspecified affective psychoses NOS                          |
| 27 | E1y..00 | Other specified non-organic psychoses                        |  | Eu34012 | [X]Cycloid personality                                       |
| 28 |         |                                                              |  | Eu16500 | [X]Mental & behav dis due to hallucinogens: psychotic disord |
| 29 | Eu31300 | [X]Bipolar affect disorder cur epi mild or moderate depressn |  | E116600 | Mixed bipolar affective disorder, in full remission          |
| 30 | Eu20000 | [X]Paranoid schizophrenia                                    |  | E03..00 | Transient organic psychoses                                  |
| 31 | Eu31000 | [X]Bipolar affective disorder, current episode hypomanic     |  | Eu22111 | [X]Capgras syndrome                                          |
| 32 | Eu33315 | [X]Recurrent severe episodes of psychotic depression         |  | Eu22y13 | [X]Paranoia querulans                                        |
| 33 | Eu25011 | [X]Schizoaffective psychosis, manic type                     |  | 1BH2.00 | Ideas of reference                                           |
| 34 | Eu2..00 | [X]Schizophrenia, schizotypal and delusional disorders       |  | ZV40y00 | [V]Other specified mental or behavioural problem             |
| 35 | E114.11 | Manic-depressive - now manic                                 |  | E114400 | Bipolar affect disord, currently manic,severe with psychosis |
| 36 | Eu60513 | [X]Obsessive-compulsive personality disorder                 |  | Eu60y11 | [X]Eccentric personality disorder                            |
| 37 | Eu10514 | [X]Alcoholic psychosis NOS                                   |  | E141.00 | Disintegrative psychosis                                     |
| 38 | Eu53111 | [X]Puerperal psychosis NOS                                   |  | Eu17100 | [X]Mental and behav dis due to use of tobacco: harmful use   |
| 39 | E130.11 | Psychotic reactive depression                                |  | Eu16300 | [X]Mental and behav dis due hallucinogens: withdrawal state  |
| 40 | 1BH..11 | Delusion                                                     |  | Eu62.00 | [X]Enduring personality change not attrib to brain damag/dis |
| 41 | Eu20y13 | [X]Schizophrenifrm psychos NOS                               |  | E107500 | Schizo-affective schizophrenia in remission                  |
| 42 | E21y200 | Borderline personality disorder                              |  | Eu60213 | [X]Asocial personality disorder                              |
| 43 |         |                                                              |  | Eu12200 | [X]Mental and behav dis due to cannabinoids: dependence synd |
| 44 | E110.11 | Hypomanic psychoses                                          |  |         |                                                              |
| 45 | 212T.00 | Psychosis, schizophrenia + bipolar affective disord resolved |  |         |                                                              |
| 46 | 1B1b.00 | Transient hallucinations                                     |  |         |                                                              |
| 47 | R001z00 | [D]Hallucinations NOS                                        |  |         |                                                              |
| 48 | E215100 | Munchausen's syndrome                                        |  |         |                                                              |

|    |         |                                                              |         |                                                              |
|----|---------|--------------------------------------------------------------|---------|--------------------------------------------------------------|
| 1  | E216.13 | Labile personality                                           | Eu19700 | [X]Men/beh dis mlt drg use/oth subs: resid/late psychot dis  |
| 2  | E111000 | Recurrent manic episodes, unspecified                        | Eu8z.00 | [X]Unspecified disorder of psychological development         |
| 3  | E2C3200 | Kleptomania                                                  | Z57C611 | Schizophrenic language                                       |
| 4  | E21yz11 | Manipulative personality                                     | Eu62011 | [X]Personality change after concentration camp experiences   |
| 5  |         |                                                              | E115600 | Bipolar affective disorder, now depressed, in full remission |
| 6  | E110000 | Single manic episode, unspecified                            | Eu12700 | [X]Mnt/bh dis due cannabinds: resid & late-onset psychot dis |
| 7  | E13..11 | Reactive psychoses                                           | E114z00 | Bipolar affective disorder, currently manic, NOS             |
| 8  |         |                                                              | E03z.00 | Transient organic psychoses NOS                              |
| 9  | E2C3300 | Pyromania                                                    | E100300 | Acute exacerbation of subchronic schizophrenia               |
| 10 | Eu10300 | [X]Mental and behav dis due to use alcohol: withdrawal state | Eu03.11 | [X]Korsakov's psychosis, nonalcoholic                        |
| 11 | Eu20211 | [X]Catatonic stupor                                          | Eu25y00 | [X]Other schizoaffective disorders                           |
| 12 | Eu20400 | [X]Post-schizophrenic depression                             | E100500 | Schizophrenia in remission                                   |
| 13 | Eu60311 | [X]Aggressive personality disorder                           | Eu60313 | [X]Explosive personality disorder                            |
| 14 | E214.00 | Compulsive personality disorders                             | E102000 | Unspecified catatonic schizophrenia                          |
| 15 | Eu6..00 | [X]Disorders of adult personality and behaviour              | E107000 | Unspecified schizo-affective schizophrenia                   |
| 16 | Eu30200 | [X]Mania with psychotic symptoms                             | E111500 | Recurrent manic episodes, partial or unspecified remission   |
| 17 | E21y700 | Psychoneurotic personality disorder                          | E107300 | Acute exacerbation subchronic schizo-affective schizophrenia |
| 18 | Eu81.00 | [X]Specific developmental disorders of scholastic skills     | Eu60714 | [X]Self defeating personality disorder                       |
| 19 | Eu60000 | [X]Paranoid personality disorder                             | Eu18100 | [X]Mental and behav dis due volatile solvents: harmful use   |
| 20 | Eu23012 | [X]Cycloid psychosis                                         | E114500 | Bipolar affect disord,currently manic, part/unspec remission |
| 21 | Eu34000 | [X]Cyclothymia                                               | Eu23211 | [X]Brief schizophreniform disorder                           |
| 22 | Eu23100 | [X]Acute polymorphic psychot disord with symp of schizophren | Eu15700 | [X]Mnt/bh dis oth stm inc caffne resid/late-onset psycht dis |
| 23 | E216.12 | Dependent personality                                        | E03yz00 | Other transient organic psychoses NOS                        |
| 24 | Eu60214 | [X]Psychopathic personality disorder                         | Eu84512 | [X]Schizoid disorder of childhood                            |
| 25 | Eu10100 | [X]Mental and behav dis due to use of alcohol: harmful use   | Eu06000 | [X]Organic personality disorder                              |
| 26 | Eu0z.11 | [X]Organic psychosis NOS                                     | Eu20300 | [X]Undifferentiated schizophrenia                            |
| 27 | Eu05200 | [X]Organic delusional [schizophrenia-like] disorder          | E11y.00 | Other and unspecified manic-depressive psychoses             |
| 28 | Eu04.15 | [X]Acute / subacute psycho-organic reaction                  | E2Az.00 | Nonpsychotic mental disorder post-organic brain damage NOS   |
| 29 | ZV11112 | [V]Personal history of manic-depressive psychosis            | E215z00 | Histrionic personality disorder NOS                          |
| 30 | E02y400 | Drug-induced personality disorder                            | Eu19000 | [X]Mental/behav dis multi drg use/psychoac subs: acute intox |
| 31 | ZV11000 | [V]Personal history of schizophrenia                         | E107100 | Subchronic schizo-affective schizophrenia                    |
| 32 | E13y000 | Psychogenic stupor                                           | Eu84013 | [X]Infantile psychosis                                       |
| 33 | E1z..00 | Non-organic psychosis NOS                                    | Eu13300 | [X]Mental and behav dis due sed/s/hypntcs: withdrawal state  |
| 34 | Eu60512 | [X]Obsessional personality disorder                          | Eu20200 | [X]Catatonic schizophrenia                                   |
| 35 | Euz..11 | [X]Mental illness NOS                                        | Eu17.00 | [X]Mental and behavioural disorder due to use of tobacco     |
| 36 | 1BH3.00 | Paranoid ideation                                            | E212200 | Schizotypal personality                                      |
| 37 | 286..11 | Poor insight into psychotic condition                        | Eu10700 | [X]Men & behav dis due alcoh: resid & late-onset psychot dis |
| 38 | 1S42.00 | Manic mood                                                   | E04..00 | Other chronic organic psychoses                              |
| 39 | Eu0..00 | [X]Organic, including symptomatic, mental disorders          | Eu84312 | [X]Disintegrative psychosis                                  |
| 40 | E13y100 | Brief reactive psychosis                                     | Eu22100 | [X]Delusional misidentification syndrome                     |
| 41 | E213.00 | Explosive personality disorder                               | Eu21.14 | [X]Prepsychotic schizophrenia                                |
| 42 | E100100 | Subchronic schizophrenia                                     |         |                                                              |
| 43 | Eu53z00 | [X]Puerperal mental disorder, unspecified                    |         |                                                              |

|         |                                                                 |         |                                                                 |
|---------|-----------------------------------------------------------------|---------|-----------------------------------------------------------------|
| E04y.00 | Other specified chronic organic psychoses                       | E123.00 | Shared paranoid disorder                                        |
| Eu06.00 | [X]Personality and behav disorder brain dis<br>dam and dysfunct | E2Ay.00 | Other specific mental disorder post-organic brain<br>damage     |
| Eu31400 | [X]Bipol aff disord, curr epis sev depress, no<br>psychot symp  | Eu19100 | [X]Mental and behav dis mlti drg/oth psychoa sbs:<br>harmfl use |
| Eu33311 | [X]Endogenous depression with psychotic<br>symptoms             | E116200 | Mixed bipolar affective disorder, moderate                      |
| E040.11 | Korsakoff's non-alcoholic psychosis                             | E116300 | Mixed bipolar affective disorder, severe, without<br>psychosis  |
| Eu34013 | [X]Cyclothymic personality                                      | E107400 | Acute exacerbation of chronic schizo-affective<br>schizophrenia |
| ZV11111 | [V]Personal history of manic-depressive<br>psychosis            | E116z00 | Mixed bipolar affective disorder, NOS                           |
| E217.00 | Antisocial or sociopathic personality disorder                  | E116500 | Mixed bipolar affective disorder, partial/unspec<br>remission   |
| Eu05300 | [X]Organic mood [affective] disorders                           | E117100 | Unspecified bipolar affective disorder, mild                    |
| Eu84111 | [X]Atypical childhood psychosis                                 | E115400 | Bipolar affect disord, now depressed, severe with<br>psychosis  |
| Eu20511 | [X]Chronic undifferentiated schizophrenia                       | E114600 | Bipolar affective disorder, currently manic, full<br>remission  |
| Eu32313 | [X]Single episode of psychotic depression                       | ZV40200 | [V]Other mental problems                                        |
| Eu32311 | [X]Single episode of major depression and<br>psychotic symptoms | E2A1z00 | Organic personality syndrome NOS                                |
| E113400 | Recurrent major depressive episodes, severe,<br>with psychosis  | E102z00 | Catatonic schizophrenia NOS                                     |
| E117600 | Unspecified bipolar affective disorder, in full<br>remission    | Eu06z00 | [X]Unspec organ personality behav disorder brain dam<br>dysfunc |
| E14y000 | Atypical childhood psychoses                                    | R001300 | [D]Hallucinations, tactile                                      |
| E134.00 | Psychogenic paranoid psychosis                                  | Eu13000 | [X]Mental & behav dis due seds/hypntcs: acute<br>intoxication   |
| Eu04.13 | [X]Acute / subacute infective psychosis                         | Eu20500 | [X]Residual schizophrenia                                       |
| 146Z.00 | H/O: psychiatric disorder NOS                                   | Eu20212 | [X]Schizophrenic catalepsy                                      |
| Eu19500 | [X]Ment/behav dis mlti drug use/oth psyc sbs:<br>psychotc dis   | Eu6y.00 | [X]Other disorders of adult personality and behaviour           |
| E110200 | Single manic episode, moderate                                  | Eu21.13 | [X]Latent schizophrenia                                         |
| E116100 | Mixed bipolar affective disorder, mild                          | Eu22014 | [X]Sensitiver Beziehungswahn                                    |
| Eu53.00 | [X]Mental and behav disorders assoc with the<br>puerperium NEC  | Eu12300 | [X]Mental and behav dis due cannabinoids:<br>withdrawal state   |
| Eu23.00 | [X]Acute and transient psychotic disorders                      | Eu62012 | [X]Personality change after disasters                           |
| Eu04.00 | [X]Delirium, not induced by alcohol+other<br>psychoactive subs  | E111300 | Recurrent manic episodes, severe without mention<br>psychosis   |
| E2A1.00 | Organic personality syndrome                                    | Eu16200 | [X]Mental and behav dis due to hallucinogens:<br>dependence syn |
| ZV40.00 | [V]Mental and behavioural problems                              | Eu22y00 | [X]Other persistent delusional disorders                        |
| E21y.00 | Other personality disorders                                     | Eu31.13 | [X]Manic-depressive reaction                                    |
| Eu8..00 | [X]Disorders of psychological development                       | Eu16000 | [X]Mental & behav dis due hallucinogens: acute<br>intoxicatn    |
| R001200 | [D]Hallucinations, olfactory                                    | E105.00 | Latent schizophrenia                                            |
| E102.00 | Catatonic schizophrenia                                         | E101000 | Unspecified hebephrenic schizophrenia                           |
| Eu54.00 | [X]Psychological/behav factor assoc with<br>disorder or dis EC  | E0y..00 | Other specified organic psychoses                               |
| E02z.00 | Drug psychosis NOS                                              | E14yz00 | Other childhood psychoses NOS                                   |
| E13yz00 | Other reactive psychoses NOS                                    | E12y000 | Paranoia querulans                                              |
| Eu23112 | [X]Cycloid psychosis with symptoms of<br>schizophrenia          | E212000 | Unspecified schizoid personality disorder                       |
| E11..13 | Manic psychoses                                                 | Eu16100 | [X]Mental and behav dis due to use hallucinogens:<br>harmfl use |
| E111.00 | Recurrent manic episodes                                        | Eu14300 | [X]Mental and behav dis due to use cocaine:<br>withdrawal state |

|    |         |                                                              |         |                                                              |
|----|---------|--------------------------------------------------------------|---------|--------------------------------------------------------------|
| 1  | Eu31100 | [X]Bipolar affect disorder cur epi manic wout psychotic symp | E215300 | Psychoinfantile personality                                  |
| 2  | Eu34011 | [X]Affective personality disorder                            | E01z.00 | Alcoholic psychosis NOS                                      |
| 3  | Eu21.18 | [X]Schizotypal personality disorder                          | E101500 | Hebephrenic schizophrenia in remission                       |
| 4  | E215.00 | Histrionic personality disorders                             | E217.11 | Amoral personality                                           |
| 5  | Eu31700 | [X]Bipolar affective disorder, currently in remission        | E133.11 | Bouffe delirante                                             |
| 6  |         |                                                              |         |                                                              |
| 7  | Eu11700 | [X]Men & beh dis due opioids: resid & late-onset psychot dis | E01yz00 | Other alcoholic psychosis NOS                                |
| 8  |         |                                                              |         |                                                              |
| 9  | Eu66.00 | [X]Psychol and behav disorder assoc with sex dev and orienta | E03y.00 | Other transient organic psychoses                            |
| 10 |         |                                                              |         |                                                              |
| 11 | Ey...00 | Other specified mental disorders                             | E117400 | Unspecified bipolar affective disorder,severe with psychosis |
| 12 |         |                                                              |         |                                                              |
| 13 | E111200 | Recurrent manic episodes, moderate                           | E117200 | Unspecified bipolar affective disorder, moderate             |
| 14 | Eu02z16 | [X] Senile dementia, depressed or paranoid type              | Eu60013 | [X]Querulant personality disorder                            |
| 15 |         |                                                              |         |                                                              |
| 16 | Eu23312 | [X]Psychogenic paranoid psychosis                            | Eu13500 | [X]Mental & behav dis due to seds/hypntcs: psychotic disordr |
| 17 |         |                                                              |         |                                                              |
| 18 | E21y400 | Eccentric personality disorder                               | E14y100 | Borderline psychosis of childhood                            |
| 19 | E115200 | Bipolar affective disorder, currently depressed, moderate    | Eu60412 | [X]Psychoinfantile personality disorder                      |
| 20 |         |                                                              |         |                                                              |
| 21 | Eu02z15 | [X] Senile psychosis NOS                                     | E110600 | Single manic episode in full remission                       |
| 22 | Eu60411 | [X]Hysterical personality disorder                           | E11y300 | Other mixed manic-depressive psychoses                       |
| 23 | Eu05.00 | [X]Oth mental disorder brain damag/dysfunction/physical disr | E117500 | Unspecified bipolar affect disord, partial/unspec remission  |
| 24 |         |                                                              |         |                                                              |
| 25 | E117z00 | Unspecified bipolar affective disorder, NOS                  | Eu23212 | [X]Brief schizophrenifrm psych                               |
| 26 | Eu3y.00 | [X]Other mood affective disorders                            | E21y600 | Masochistic personality disorder                             |
| 27 | Eu44.14 | [X]Hysterical psychosis                                      | E11y100 | Atypical manic disorder                                      |
| 28 | E21..11 | Neurotic personality disorder                                | Eu21.17 | [X]Pseudopsychopathic schizophrenia                          |
| 29 | Eu31200 | [X]Bipolar affect disorder cur epi manic with psychotic symp | Eu60y12 | [X]Haltlose type personality disorder                        |
| 30 |         |                                                              |         |                                                              |
| 31 | Eu22.00 | [X]Persistent delusional disorders                           | E14y.00 | Other childhood psychoses                                    |
| 32 | Eu33312 | [X]Manic-depress psychosis,depressed type+psychotic symptoms | E115500 | Bipolar affect disord, now depressed, part/unspec remission  |
| 33 |         |                                                              |         |                                                              |
| 34 | E02yz00 | Other drug psychoses NOS                                     | E100.11 | Schizophrenia simplex                                        |
| 35 | Eu32314 | [X]Single episode of reactive depressive psychosis           | E117300 | Unspecified bipolar affective disorder, severe, no psychosis |
| 36 |         |                                                              |         |                                                              |
| 37 | Eu33213 | [X]Manic-depress psychosis,depressd,no psychotic symptoms    | ZVu6K00 | [X]Personal history/other mental and behavioural disorders   |
| 38 |         |                                                              |         |                                                              |
| 39 | Eu3yy00 | [X]Other specified mood affective disorders                  | Eu31y11 | [X]Bipolar II disorder                                       |
| 40 | Eu23z12 | [X]Reactive psychosis                                        | ZV11z00 | [V]Personal history of unspecified mental disorder           |
| 41 | Eu3y100 | [X]Other recurrent mood affective disorders                  | 212V.00 | Bipolar affective disorder resolved                          |
| 42 | E131.00 | Acute hysterical psychosis                                   | 1B1e.00 | Hypnopompic hallucination                                    |
| 43 | Eu1..00 | [X]Mental and behavioural disorders due to psychoactive subs | 212X.00 | Psychosis resolved                                           |
| 44 |         |                                                              |         |                                                              |
| 45 | ZV11.00 | [V]Personal history of mental disorder                       | Eu1A100 | [X]Mental behav disorders due use crack cocaine: harmful use |
| 46 |         |                                                              |         |                                                              |
| 47 | ZRby100 | Profile of mood states, bipolar                              | 1B1d.00 | Hypnagogic hallucination                                     |
| 48 | E214000 | Anankastic personality                                       | Eu62z00 | [X]Enduring personality change, unspecified                  |
| 49 | Eu66y00 | [X]Other psychosexual development disorders                  | 212W.00 | Schizophrenia resolved                                       |
| 50 | Eu61.00 | [X]Mixed and other personality disorders                     | Eu21.11 | [X]Latent schizophrenic reaction                             |
| 51 | E101.00 | Hebephrenic schizophrenia                                    | Eu20311 | [X]Atypical schizophrenia                                    |
| 52 | Eu3y011 | [X]Mixed affective episode                                   | E10y.11 | Cenesthopathic schizophrenia                                 |
| 53 | Eu2y.00 | [X]Other nonorganic psychotic disorders                      | Eu13100 | [X]Mental and behav dis due to use seds/hypntcs: harmful use |
| 54 |         |                                                              |         |                                                              |
| 55 | ZV71000 | [V]Observation for mental disorder                           | ZV11y00 | [V]Personal history of other specified mental disorder       |
| 56 | Eu6y111 | [X] Munchausens syndrome                                     | Eu06011 | [X]Organic pseudopsychopathic personality                    |
| 57 | E116.00 | Mixed bipolar affective disorder                             | Eu20y12 | [X]Schizophreniform disord NOS                               |
| 58 |         |                                                              |         |                                                              |
| 59 |         |                                                              |         |                                                              |
| 60 |         |                                                              |         |                                                              |

|    |         |                                                              |         |                                                              |
|----|---------|--------------------------------------------------------------|---------|--------------------------------------------------------------|
| 1  | E103200 | Chronic paranoid schizophrenia                               | E105200 | Chronic latent schizophrenia                                 |
| 2  | E12yz00 | Other paranoid states NOS                                    | Eu23214 | [X]Schizophrenic reaction                                    |
| 3  | Eu20214 | [X]Schizophrenic flexibilatis cerea                          | E105500 | Latent schizophrenia in remission                            |
| 4  | E116000 | Mixed bipolar affective disorder, unspecified                | Eu12600 | [X]Mental and behav dis due to use cannabinoids: amnesic syn |
| 5  | E12y.00 | Other paranoid states                                        | Eu05z12 | [X]Organic mental disorder NOS                               |
| 6  | Eu60200 | [X]Dissocial personality disorder                            | E101400 | Acute exacerbation of chronic hebephrenic schizophrenia      |
| 7  |         |                                                              | Eu32800 | [X]Major depression, severe with psychotic symptoms          |
| 8  | Eu3z.11 | [X]Affective psychosis NOS                                   | Eu18500 | [X]Mental & behav dis due to vol solvents: psychotic disordr |
| 9  | ZV40.12 | [V]Mental problems                                           | Eu22200 | [X]Cotard syndrome                                           |
| 10 |         |                                                              | E107.11 | Cyclic schizophrenia                                         |
| 11 | Eu23z11 | [X]Brief reactive psychosis NOS                              | E10y100 | Coenesthopathic schizophrenia                                |
| 12 | Eu18.00 | [X]Mental & behav disorders due to use of volatile solvents  | E102100 | Subchronic catatonic schizophrenia                           |
| 13 |         |                                                              | Eu94211 | [X]Affectionless psychopathy                                 |
| 14 | Eu2y.11 | [X]Chronic hallucinatory psychosis                           | Eu3y200 | [X]Premenstrual dysphoric disorder                           |
| 15 | Eu33314 | [X]Recurr severe episodes/psychogenic depressive psychosis   | 14g..00 | History of developmental disorder                            |
| 16 |         |                                                              | L184400 | Mental disorder in puerperium - baby previously delivered    |
| 17 | Eu60312 | [X]Borderline personality disorder                           | Eu32900 | [X]Single major depr ep, severe with psych, psych in remiss  |
| 18 | Eu62015 | [X]Personality change after torture                          | Eu32A00 | [X]Recurr major depr ep, severe with psych, psych in remiss  |
| 19 | Eu60700 | [X]Dependent personality disorder                            | Eu17300 | [X]Mental and behav dis due to use tobacco: withdrawal state |
| 20 | Eu05212 | [X]Schizophrenia-like psychosis in epilepsy                  | Eu22300 | [X]Paranoid state in remission                               |
| 21 |         |                                                              | Eu1A300 | [X]Mental behav disord due crack cocaine: withdrawal state   |
| 22 | E13..00 | Other nonorganic psychoses                                   | Eu26.00 | [X]Nonorganic psychosis in remission                         |
| 23 |         |                                                              | E105000 | Unspecified latent schizophrenia                             |
| 24 | Eu14.00 | [X]Mental and behavioural disorders due to use of cocaine    | E102500 | Catatonic schizophrenia in remission                         |
| 25 |         |                                                              | E105z00 | Latent schizophrenia NOS                                     |
| 26 | Eu30y00 | [X]Other manic episodes                                      | Eu1A500 | [X]Mental behav disord due crack cocaine: psychotic disorder |
| 27 |         |                                                              | Eu1A200 | [X]Mental behav disorders due use crack cocaine: depend synd |
| 28 | E112400 | Single major depressive episode, severe, with psychosis      | Eu14700 | [X]Men & beh dis due cocaine: resid & late-onset psychot dis |
| 29 | E100.00 | Simple schizophrenia                                         | L184200 | Mental disorder in the puerperium - baby delivered           |
| 30 |         |                                                              | Eu31900 | [X]Bipolar affective disorder type II                        |
| 31 | E111400 | Recurrent manic episodes, severe, with psychosis             | Eu11600 | [X]Mental and behav dis due to use opioids: amnesic syndrome |
| 32 | Eu1A.00 | [X]Mental and behavioural disorders due use of crack cocaine | Eu31911 | [X]Bipolar II disorder                                       |
| 33 |         |                                                              | Eu31800 | [X]Bipolar affective disorder type I                         |
| 34 | Eu60212 | [X]Antisocial personality disorder                           | E103100 | Subchronic paranoid schizophrenia                            |
| 35 | 1BH1.00 | Grandiose delusions                                          | Eu25211 | [X]Cyclic schizophrenia                                      |
| 36 | Eu33313 | [X]Recurr severe episodes/major depression+psychotic symptom | Eu60211 | [X]Amoral personality disorder                               |
| 37 | E10y000 | Atypical schizophrenia                                       | Eu16700 | [X]Mnt/bh dis due hallucngns: resid & late-onset psychot dis |
| 38 |         |                                                              | Eu24.11 | [X]Folie a deux                                              |
| 39 | E103000 | Unspecified paranoid schizophrenia                           | Eu19600 | [X]Mental/behav dis multi drg use/oth psy sbs:               |
| 40 |         |                                                              |         |                                                              |
| 41 | Eu25z11 | [X]Schizoaffective psychosis NOS                             |         |                                                              |
| 42 | E11zz00 | Other affective psychosis NOS                                |         |                                                              |
| 43 | E11yz00 | Other and unspecified manic-depressive psychoses NOS         |         |                                                              |
| 44 | Eu15200 | [X]Mental and behav dis oth stim inc caffein: dependnce synd |         |                                                              |
| 45 | E01y.00 | Other alcoholic psychosis                                    |         |                                                              |
| 46 | Eu25200 | [X]Schizoaffective disorder, mixed type                      |         |                                                              |
| 47 | E00..00 | Senile and presenile organic psychotic conditions            |         |                                                              |
| 48 | Eu60713 | [X]Passive personality disorder                              |         |                                                              |
| 49 | Eu31z00 | [X]Bipolar affective disorder, unspecified                   |         |                                                              |
| 50 |         |                                                              |         |                                                              |
| 51 | E2Fz.00 | Developmental disorder NOS                                   |         |                                                              |
| 52 | Eu25000 | [X]Schizoaffective disorder, manic type                      |         |                                                              |
| 53 |         |                                                              |         |                                                              |
| 54 |         |                                                              |         |                                                              |
| 55 |         |                                                              |         |                                                              |
| 56 |         |                                                              |         |                                                              |
| 57 |         |                                                              |         |                                                              |
| 58 |         |                                                              |         |                                                              |
| 59 |         |                                                              |         |                                                              |



|    |         |                                                              |               |                                                              |                                                       |
|----|---------|--------------------------------------------------------------|---------------|--------------------------------------------------------------|-------------------------------------------------------|
| 1  | Eu23z00 | [X]Acute and transient psychotic disorder, unspecified       | amnesic syndr | E102400                                                      | Acute exacerbation of chronic catatonic schizophrenia |
| 2  |         |                                                              |               |                                                              |                                                       |
| 3  | Eu20.00 | [X]Schizophrenia                                             | Eu8z.11       | [X]Psychological developmental disorder NOS                  |                                                       |
| 4  | Eu11200 | [X]Mental and behav dis due to use opioids: dependence syndr | Eu17200       | [X]Mental and behav dis due to use tobacco: dependence syndr |                                                       |
| 5  |         |                                                              |               |                                                              |                                                       |
| 6  | Eu22000 | [X]Delusional disorder                                       | E21y000       | Narcissistic personality disorder                            |                                                       |
| 7  | E214z00 | Compulsive personality disorder NOS                          | E115z00       | Bipolar affective disorder, currently depressed, NOS         |                                                       |
| 8  | Eu62y11 | [X]Chronic pain personality syndrome                         | Eu12000       | [X]Mental & behav dis due cannabinoids: acute intoxication   |                                                       |
| 9  |         |                                                              |               |                                                              |                                                       |
| 10 | Eu6yy00 | [X]Other specified disorders of adult personality/behaviour  | E14z.11       | Childhood schizophrenia NOS                                  |                                                       |
| 11 |         |                                                              |               |                                                              |                                                       |
| 12 | Eu20z00 | [X]Schizophrenia, unspecified                                | Eu62100       | [X]Enduring personality change after psychiatric illness     |                                                       |
| 13 | Eu2..00 | [X]Mental disorder, not otherwise specified                  | Eu11100       | [X]Mental and behav dis due to use of opioids: harmful use   |                                                       |
| 14 |         |                                                              |               |                                                              |                                                       |
| 15 | Eu62y00 | [X]Other enduring personality changes                        | Eu25212       | [X]Mixed schizophrenic and affective psychosis               |                                                       |
| 16 | Eu25111 | [X]Schizoaffective psychosis, depressive type                | Eu6y000       | [X]Elaboration of physical symptoms for psychological reason |                                                       |
| 17 |         |                                                              |               |                                                              |                                                       |
| 18 | E115300 | Bipolar affect disord, now depressed, severe, no psychosis   | Eu25z00       | [X]Schizoaffective disorder, unspecified                     |                                                       |
| 19 |         |                                                              |               |                                                              |                                                       |
| 20 | E21y100 | Avoidant personality disorder                                | Eu33316       | [X]Recurrent severe episodes/reactive depressive psychosis   |                                                       |
| 21 |         |                                                              |               |                                                              |                                                       |
| 22 | E115100 | Bipolar affective disorder, currently depressed, mild        | Eu60712       | [X]Inadequate personality disorder                           |                                                       |
| 23 |         |                                                              |               |                                                              |                                                       |
| 24 | E114000 | Bipolar affective disorder, currently manic, unspecified     | E106.00       | Residual schizophrenia                                       |                                                       |
| 25 |         |                                                              |               |                                                              |                                                       |
| 26 | E21y300 | Passive-aggressive personality disorder                      | Eu60511       | [X]Compulsive personality disorder                           |                                                       |
| 27 | Eu20600 | [X]Simple schizophrenia                                      | Eu60100       | [X]Schizoid personality disorder                             |                                                       |
| 28 | Eu20213 | [X]Schizophrenic catatonia                                   | Eu12500       | [X]Mental & behav dis due to cannabinoids: psychotic disordr |                                                       |
| 29 |         |                                                              |               |                                                              |                                                       |
| 30 | E213.12 | Quarrelsome personality                                      | E212100       | Introverted personality                                      |                                                       |
| 31 |         |                                                              |               |                                                              |                                                       |
| 32 | E114100 | Bipolar affective disorder, currently manic, mild            | E10y.00       | Other schizophrenia                                          |                                                       |
| 33 |         |                                                              |               |                                                              |                                                       |
| 34 | E103500 | Paranoid schizophrenia in remission                          | ZS34.00       | Developmental disorder of scholastic skill                   |                                                       |
| 35 | Eu11300 | [X]Mental and behav dis due to use opioids: withdrawal state | Eu21.00       | [X]Schizotypal disorder                                      |                                                       |
| 36 |         |                                                              |               |                                                              |                                                       |
| 37 | E110z00 | Manic disorder, single episode NOS                           | Eu10200       | [X]Mental and behav dis due to use alcohol: dependence syndr |                                                       |
| 38 |         |                                                              |               |                                                              |                                                       |
| 39 | Eu23000 | [X]Acute polymorphic psychot disord without symp of schizop  | Eu3z.00       | [X]Unspecified mood affective disorder                       |                                                       |
| 40 |         |                                                              |               |                                                              |                                                       |
| 41 | E0z..00 | Organic psychoses NOS                                        | Eu30211       | [X]Mania with mood-congruent psychotic symptoms              |                                                       |
| 42 | E110.00 | Manic disorder, single episode                               | E111600       | Recurrent manic episodes, in full remission                  |                                                       |
| 43 |         |                                                              |               |                                                              |                                                       |
| 44 |         |                                                              |               |                                                              |                                                       |
| 45 |         |                                                              |               |                                                              |                                                       |
| 46 |         |                                                              |               |                                                              |                                                       |
| 47 |         |                                                              |               |                                                              |                                                       |
| 48 |         |                                                              |               |                                                              |                                                       |
| 49 |         |                                                              |               |                                                              |                                                       |
| 50 |         |                                                              |               |                                                              |                                                       |
| 51 |         |                                                              |               |                                                              |                                                       |
| 52 |         |                                                              |               |                                                              |                                                       |
| 53 |         |                                                              |               |                                                              |                                                       |
| 54 |         |                                                              |               |                                                              |                                                       |
| 55 |         |                                                              |               |                                                              |                                                       |
| 56 |         |                                                              |               |                                                              |                                                       |
| 57 |         |                                                              |               |                                                              |                                                       |
| 58 |         |                                                              |               |                                                              |                                                       |
| 59 |         |                                                              |               |                                                              |                                                       |
| 60 |         |                                                              |               |                                                              |                                                       |

**ALCOHOL AND DRUG DEPENDENCE****At least one ICD-9 in:**

- 303 Alcohol dependance syndrome
- 305.00 Non dependent alcohol abuse
- 305.00 Alcohol abuse, unspecified
- 305.01 Alcohol abuse, continuous
- 305.03** Alcohol abuse, episodic
- 305.03 Alcohol abuse, in remission
- 304 Drug dependence
- 304.0 Opioid type dependence
- 304.1 Sedative, hypnotic or anxiolytic dependence
- 304.2 Cocaine dependence
- 304.3 Cannabis dependence
- 304.4 Amphetamine and other psychostimulant dependence
- 304.5 Hallucinogen dependence
- 304.6 Other specified drug dependence
- 304.7 Combinations of opioid type drug with any other drug dependence
- 304.8 Combinations of drug dependence excluding opioid type drug
- 304.9 Unspecified drug dependence

OR

**At least one ICD-10 in:**

- F10 Alcohol related disorders
- F10.0 acute intoxication
- F10.1 harmful use
- F10.2 dependence syndrome
- F10.3 withdrawal state
- F10.4 withdrawal state with delirium
- F10.5 psychotic disorder
- F10.6 amnesic syndrome
- F10.7 Residual and late-onset psychotic disorder
- F10.8 other mental and behavioural disorder
- F10.9 unspecified mental and behavioural disorder
- F11 Opioids related disorders
- F12 Cannabis related disorders
- F13 Sedative, hypnotic, or anxiolytic related disorders
- F14 Cocaine related disorders
- F15 Other stimulant related disorders
- F16 Hallucinogen related disorders
- F17 Nicotine dependence
- F18 Inhalant related disorders
- F19 Other psychoactive substance related disorders

OR

## At least one READ code in:

|         |                                                  |         |                                                          |
|---------|--------------------------------------------------|---------|----------------------------------------------------------|
| 136..00 | Alcohol consumption                              | E245z00 | Hallucinogen dependence NOS                              |
| 136K.00 | Alcohol intake above recommended sensible limits | E246.00 | Glue sniffing dependence                                 |
| 136S.00 | Hazardous alcohol use                            | E246000 | Glue sniffing dependence, unspecified                    |
| 136T.00 | Harmful alcohol use                              | E246100 | Glue sniffing dependence, continuous                     |
| 136W.00 | Alcohol misuse                                   | E246200 | Glue sniffing dependence, episodic                       |
| 136Z.00 | Alcohol consumption NOS                          | E246300 | Glue sniffing dependence in remission                    |
| 13c..00 | Drug user                                        | E246z00 | Glue sniffing dependence NOS                             |
| 13c0.00 | Injecting drug user                              | E247.00 | Other specified drug dependence                          |
| 13c1.00 | Intravenous drug user                            | E247.11 | Absinthe addiction                                       |
| 13c2.00 | Never injecting drug user                        | E247000 | Other specified drug dependence, unspecified             |
| 13c3.00 | Intramuscular drug user                          | E247100 | Other specified drug dependence, continuous              |
| 13c4.00 | Intranasal drug user                             | E247200 | Other specified drug dependence, episodic                |
| 13c7.00 | Current drug user                                | E247300 | Other specified drug dependence in remission             |
| 13c9.00 | Subcutaneous drug user                           | E247z00 | Other specified drug dependence NOS                      |
| 13cA.00 | Smokes drugs                                     | E248.00 | Combined opioid with other drug dependence               |
| 13cB.00 | Misuses drugs orally                             | E248000 | Combined opioid with other drug dependence, unspecified  |
| 13cC.00 | Continuous use of drugs                          | E248100 | Combined opioid with other drug dependence, continuous   |
| 13cD.00 | Episodic use of drugs                            | E248200 | Combined opioid with other drug dependence, episodic     |
| 13cE.00 | Prolonged high dose use of cannabis              | E248300 | Combined opioid with other drug dependence in remission  |
| 13cH.00 | Persistent substance misuse                      | E248z00 | Combined opioid with other drug dependence NOS           |
| 13cJ.00 | Previously injecting drug user                   | E249.00 | Combined drug dependence, excluding opioids              |
| 13cK.00 | Current non recreational drug user               | E249000 | Combined drug dependence, excluding opioid, unspecified  |
| 1462.00 | H/O: alcoholism                                  | E249100 | Combined drug dependence, excluding opioid, continuous   |
| 1463.00 | H/O: drug dependency                             | E249200 | Combined drug dependence, excluding opioid, episodic     |
| 146E.00 | H/O: recreational drug use                       | E249300 | Combined drug dependence, excluding opioid, in remission |
| 146F.00 | H/O: drug abuse                                  | E249z00 | Combined drug dependence, excluding opioid, NOS          |
| 1B1c.00 | Alcohol induced hallucinations                   | E24A.00 | Ecstasy type drug dependence                             |
| 1P30.00 | Compulsive uncontrollable drug taking            | E24z.00 | Drug dependence NOS                                      |
| 1P31.00 | Compulsive drug taking                           | E250.11 | Drunkenness NOS                                          |
| 1P6..00 | Craving for drugs                                | E250.12 | Hangover (alcohol)                                       |
| 1P62.00 | Abnormal craving for drugs                       | E250.13 | Inebriety NOS                                            |
| 1T...00 | History of substance misuse                      | E250.14 | Intoxication - alcohol                                   |
| 1T0..00 | H/O heroin misuse                                | E254.11 | Barbiturate abuse                                        |
| 1T00.00 | H/O daily heroin misuse                          | E254.12 | Hypnotic or anxiolytic abuse                             |
| 1T01.00 | H/O weekly heroin misuse                         | E254.13 | Sedative abuse                                           |
| 1T02.00 | Previous history of heroin misuse                | E254.14 | Tranquilliser abuse                                      |
| 1T03.00 | H/O infrequent heroin misuse                     | E257.11 | Psychostimulant abuse                                    |
| 1T1..00 | H/O methadone misuse                             | E257.12 | Stimulant abuse                                          |
| 1T10.00 | H/O daily methadone misuse                       | E259400 | Misuse of prescription only drugs                        |
| 1T11.00 | H/O weekly methadone misuse                      | E25y.11 | Analgesic abuse                                          |
| 1T12.00 | H/O infrequent methadone misuse                  | E25y.12 | Laxative abuse                                           |
| 1T13.00 | Previous history of methadone misuse             | E25y.13 | Steroid abuse                                            |

|         |                                           |         |                                                                |
|---------|-------------------------------------------|---------|----------------------------------------------------------------|
| 1T2..00 | H/O ecstasy misuse                        | E25z.00 | Misuse of drugs NOS                                            |
| 1T20.00 | H/O daily ecstasy misuse                  | Eu1..00 | [X]Mental and behavioural disorders due to psychoactive subs   |
| 1T21.00 | H/O weekly ecstasy misuse                 | Eu10.00 | [X]Mental and behavioural disorders due to use of alcohol      |
| 1T22.00 | H/O infrequent ecstasy misuse             | Eu10000 | [X]Mental & behav dis due to use alcohol: acute intoxication   |
| 1T23.00 | Previous history of ecstasy misuse        | Eu10011 | [X]Acute alcoholic drunkenness                                 |
| 1T3..00 | H/O benzodiazepine misuse                 | Eu10100 | [X]Mental and behav dis due to use of alcohol: harmful use     |
| 1T30.00 | H/O daily benzodiazepine misuse           | Eu10200 | [X]Mental and behav dis due to use alcohol: dependence syndr   |
| 1T31.00 | H/O weekly benzodiazepine misuse          | Eu10211 | [X]Alcohol addiction                                           |
| 1T32.00 | H/O infrequent benzodiazepine misuse      | Eu10212 | [X]Chronic alcoholism                                          |
| 1T33.00 | Previous history of benzodiazepine misuse | Eu10213 | [X]Dipsomania                                                  |
| 1T4..00 | H/O amphetamine misuse                    | Eu10300 | [X]Mental and behav dis due to use alcohol: withdrawal state   |
| 1T40.00 | H/O daily amphetamine misuse              | Eu10400 | [X]Men & behav dis due alcohol: withdrawal state with delirium |
| 1T41.00 | H/O weekly amphetamine misuse             | Eu10411 | [X]Delirium tremens, alcohol induced                           |
| 1T42.00 | H/O infrequent amphetamine misuse         | Eu10500 | [X]Mental & behav dis due to use alcohol: psychotic disorder   |
| 1T43.00 | Previous history of amphetamine misuse    | Eu10511 | [X]Alcoholic hallucinosis                                      |
| 1T5..00 | H/O cocaine misuse                        | Eu10512 | [X]Alcoholic jealousy                                          |
| 1T50.00 | H/O daily cocaine misuse                  | Eu10513 | [X]Alcoholic paranoia                                          |
| 1T51.00 | H/O weekly cocaine misuse                 | Eu10514 | [X]Alcoholic psychosis NOS                                     |
| 1T52.00 | H/O infrequent cocaine misuse             | Eu10600 | [X]Mental and behav dis due to use alcohol: amnesic syndrome   |
| 1T53.00 | Previous history of cocaine misuse        | Eu10611 | [X]Korsakov's psychosis, alcohol induced                       |
| 1T6..00 | H/O crack cocaine misuse                  | Eu10700 | [X]Men & behav dis due alcohol: resid & late-onset psychot dis |
| 1T60.00 | H/O daily crack cocaine misuse            | Eu10711 | [X]Alcoholic dementia NOS                                      |
| 1T61.00 | H/O weekly crack cocaine misuse           | Eu10712 | [X]Chronic alcoholic brain syndrome                            |
| 1T62.00 | H/O infrequent crack cocaine misuse       | Eu10800 | [X]Alcohol withdrawal-induced seizure                          |
| 1T63.00 | Previous history of crack cocaine misuse  | Eu10y00 | [X]Men & behav dis due to use alcohol: oth men & behav dis     |
| 1T7..00 | H/O hallucinogen misuse                   | Eu10z00 | [X]Ment & behav dis due use alcohol: unsp ment & behav dis     |
| 1T73.00 | Previous history of hallucinogen misuse   | Eu11.00 | [X]Mental and behavioural disorders due to use of opioids      |
| 1T8..00 | H/O cannabis misuse                       | Eu11000 | [X]Mental & behav dis due to use opioids: acute intoxication   |
| 1T80.00 | H/O daily cannabis misuse                 | Eu11100 | [X]Mental and behav dis due to use of opioids: harmful use     |
| 1T81.00 | H/O weekly cannabis misuse                | Eu11200 | [X]Mental and behav dis due to use opioids: dependence syndr   |
| 1T82.00 | H/O infrequent cannabis misuse            | Eu11211 | [X]Drug addiction - opioids                                    |
| 1T83.00 | Previous history of cannabis misuse       | Eu11212 | [X]Heroin addiction                                            |
| 1T9..00 | H/O solvent misuse                        | Eu11300 | [X]Mental and behav dis due to use opioids: withdrawal state   |
| 1T90.00 | H/O daily solvent misuse                  | Eu11311 | [X]Cold turkey, opiate withdrawal                              |
| 1T91.00 | H/O weekly solvent misuse                 | Eu11400 | [X]Men & behav dis due opioid: withdrawal state with delirium  |
| 1T93.00 | Previous history of solvent misuse        | Eu11500 | [X]Mental & behav dis due to use opioids: psychotic disorder   |
| 1TA..00 | H/O barbiturate misuse                    | Eu11600 | [X]Mental and behav dis due to use opioids: amnesic syndrome   |
| 1TB..00 | H/O major tranquilliser misuse            | Eu11700 | [X]Men & beh dis due opioids: resid & late-onset psychot dis   |

|    |         |                                            |         |                                                              |
|----|---------|--------------------------------------------|---------|--------------------------------------------------------------|
| 1  | 1TB0.00 | H/O daily major tranquilliser misuse       | Eu11y00 | [X]Men & behav dis due to use opioids: oth men & behav dis   |
| 2  | 1TC..00 | H/O anti-depressant misuse                 | Eu11z00 | [X]Ment & behav dis due use opioids: unsp ment & behav dis   |
| 3  |         |                                            |         |                                                              |
| 4  | 1TC0.00 | H/O daily anti-depressant misuse           | Eu12.00 | [X]Mental and behavioural disorders due to use cannabinoids  |
| 5  |         |                                            |         |                                                              |
| 6  | 1TC3.00 | Previous history of anti-depressant misuse | Eu12000 | [X]Mental & behav dis due cannabinoids: acute intoxication   |
| 7  |         |                                            |         |                                                              |
| 8  | 1TD..00 | H/O opiate misuse                          | Eu12100 | [X]Mental and behav dis due to use cannabinoids: harmful use |
| 9  |         |                                            |         |                                                              |
| 10 | 1TD0.00 | H/O daily opiate misuse                    | Eu12200 | [X]Mental and behav dis due to cannabinoids: dependence synd |
| 11 |         |                                            |         |                                                              |
| 12 | 1TD1.00 | H/O weekly opiate misuse                   | Eu12211 | [X]Drug addiction - cannabis                                 |
| 13 | 1TD2.00 | H/O infrequent opiate misuse               | Eu12300 | [X]Mental and behav dis due cannabinoids: withdrawal state   |
| 14 |         |                                            |         |                                                              |
| 15 | 1TD3.00 | Previous history of opiate misuse          | Eu12500 | [X]Mental & behav dis due to cannabinoids: psychotic disordr |
| 16 |         |                                            |         |                                                              |
| 17 | 1TE..00 | Uses heroin on top of substitution therapy | Eu12600 | [X]Mental and behav dis due to use cannabinoids: amnesic syn |
| 18 |         |                                            |         |                                                              |
| 19 | 1V...00 | Drug misuse behaviour                      | Eu12700 | [X]Mnt/bh dis due cannabinds: resid & late-onset psychot dis |
| 20 |         |                                            |         |                                                              |
| 21 | 1V0..00 | Misuses drugs                              | Eu12y00 | [X]Men/behav dis due to use cannabinoids: oth men/behav disd |
| 22 |         |                                            |         |                                                              |
| 23 | 1V01.00 | Long-term drug misuser                     | Eu12z00 | [X]Ment/behav dis due use cannabinoids: unsp ment/behav disd |
| 24 |         |                                            |         |                                                              |
| 25 | 1V02.00 | Poly-drug misuser                          | Eu13.00 | [X]Mental and behavioural dis due use sedatives/hypnotics    |
| 26 |         |                                            |         |                                                              |
| 27 | 1V08.00 | Smokes drugs in cigarette form             | Eu13000 | [X]Mental & behav dis due seds/hypntcs: acute intoxication   |
| 28 |         |                                            |         |                                                              |
| 29 | 1V09.00 | Smokes drugs through a pipe                | Eu13100 | [X]Mental and behav dis due to use seds/hypntcs: harmful use |
| 30 |         |                                            |         |                                                              |
| 31 | 1V0A.00 | Chases the dragon                          | Eu13200 | [X]Mental and behav dis due to seds/hypntcs: dependence synd |
| 32 |         |                                            |         |                                                              |
| 33 | 1V0B.00 | Sniffs drugs                               | Eu13211 | [X]Drug addiction- sedative / hypnotics                      |
| 34 | 1V0C.00 | Drug addict                                | Eu13300 | [X]Mental and behav dis due seds/hypntcs: withdrawal state   |
| 35 |         |                                            |         |                                                              |
| 36 | 1V0E.00 | Health problem secondary to drug misuse    | Eu13400 | [X]Men & beh dis due seds/hypns: withdrwl state wth delirium |
| 37 |         |                                            |         |                                                              |
| 38 | 1V26.00 | Misused drugs in past                      | Eu13500 | [X]Mental & behav dis due to seds/hypntcs: psychotic disordr |
| 39 |         |                                            |         |                                                              |
| 40 | 1V3..00 | Drug injection behaviour                   | Eu14.00 | [X]Mental and behavioural disorders due to use of cocaine    |
| 41 |         |                                            |         |                                                              |
| 42 | 1V4..00 | Priority of drug-related activities        | Eu14000 | [X]Mental & behav dis due to use cocaine: acute intoxication |
| 43 |         |                                            |         |                                                              |
| 44 | 1V5..00 | Routine of drug-related activities         | Eu14100 | [X]Mental and behav dis due to use of cocaine: harmful use   |
| 45 |         |                                            |         |                                                              |
| 46 | 1V6..00 | Drug-related offending behaviour           | Eu14200 | [X]Mental and behav dis due to use cocaine: dependence syndr |
| 47 |         |                                            |         |                                                              |
| 48 | 1V64.00 | Illicit drug use                           | Eu14211 | [X]Drug addiction - cocaine                                  |
| 49 | 1V65.00 | Heroin misuse                              | Eu14300 | [X]Mental and behav dis due to use cocaine: withdrawal state |
| 50 |         |                                            |         |                                                              |
| 51 | 1V66.00 | Ecstasy misuse                             | Eu14500 | [X]Mental & behav dis due to use cocaine: psychotic disorder |
| 52 |         |                                            |         |                                                              |
| 53 | 222N.00 | O/E - signs of drug withdrawal             | Eu14700 | [X]Men & beh dis due cocaine: resid & late-onset psychot dis |
| 54 |         |                                            |         |                                                              |
| 55 | C150500 | Alcohol-induced pseudo-Cushing's syndrome  | Eu15.00 | [X]Mental & behav disorder due other stimulants inc caffein  |
| 56 |         |                                            |         |                                                              |
| 57 | E01..00 | Alcoholic psychoses                        | Eu15000 | [X]Mnt/beh dis due oth stim inc caffein: acute intoxication  |
| 58 |         |                                            |         |                                                              |
| 59 | E010.00 | Alcohol withdrawal delirium                | Eu15100 | [X]Ment/behav dis due to use oth stims inc caff: harmful use |

|    |         |                                                         |         |                                                              |
|----|---------|---------------------------------------------------------|---------|--------------------------------------------------------------|
| 1  | E010.11 | DTs - delirium tremens                                  | Eu15200 | [X]Mental and behav dis oth stim inc caffein: dependnce synd |
| 2  | E010.12 | Delirium tremens                                        | Eu15211 | [X]Drug addiction-other stimul                               |
| 3  | E011.00 | Alcohol amnestic syndrome                               | Eu15300 | [X]Mnt/behav dis other stimInts inc caffeine: withdrwl state |
| 4  |         |                                                         |         |                                                              |
| 5  | E011000 | Korsakov's alcoholic psychosis                          | Eu15500 | [X]Mental/behav dis oth stims inc caffeine: psychotic dis    |
| 6  |         |                                                         |         |                                                              |
| 7  | E011100 | Korsakov's alcoholic psychosis with peripheral neuritis | Eu15700 | [X]Mnt/bh dis oth stm inc caffne resid/late-onset psycht dis |
| 8  |         |                                                         |         |                                                              |
| 9  | E011z00 | Alcohol amnestic syndrome NOS                           | Eu15z00 | [X]Ment/beh dis oth stims inc caffeine: unsp ment/behav disd |
| 10 |         |                                                         |         |                                                              |
| 11 | E012.00 | Other alcoholic dementia                                | Eu16.00 | [X]Mental and behavioural disorders due to use hallucinogens |
| 12 |         |                                                         |         |                                                              |
| 13 | E012.11 | Alcoholic dementia NOS                                  | Eu16000 | [X]Mental & behav dis due hallucinogens: acute intoxicatn    |
| 14 |         |                                                         |         |                                                              |
| 15 | E012000 | Chronic alcoholic brain syndrome                        | Eu16100 | [X]Mental and behav dis due to use hallucinogens: harmfl use |
| 16 |         |                                                         |         |                                                              |
| 17 | E013.00 | Alcohol withdrawal hallucinosis                         | Eu16200 | [X]Mental and behav dis due to hallucinogens: dependence syn |
| 18 |         |                                                         |         |                                                              |
| 19 | E014.00 | Pathological alcohol intoxication                       | Eu16211 | [X]Drug addiction - hallucinogen                             |
| 20 | E015.00 | Alcoholic paranoia                                      | Eu16300 | [X]Mental and behav dis due hallucinogens: withdrawal state  |
| 21 |         |                                                         |         |                                                              |
| 22 | E01y.00 | Other alcoholic psychosis                               | Eu16500 | [X]Mental & behav dis due to hallucinogens: psychotic disord |
| 23 |         |                                                         |         |                                                              |
| 24 | E01y000 | Alcohol withdrawal syndrome                             | Eu16700 | [X]Mnt/bh dis due hallucngns: resid & late-onset psychot dis |
| 25 |         |                                                         |         |                                                              |
| 26 | E01yz00 | Other alcoholic psychosis NOS                           | Eu16711 | [X]Post hallucinogen perception disorder                     |
| 27 | E01z.00 | Alcoholic psychosis NOS                                 | Eu16z00 | [X]Ment/behav dis due use hallucinogens: unsp ment/behav dis |
| 28 |         |                                                         |         |                                                              |
| 29 | E02..00 | Drug psychoses                                          | Eu18.00 | [X]Mental & behav disorders due to use of volatile solvents  |
| 30 |         |                                                         |         |                                                              |
| 31 | E020.00 | Drug withdrawal syndrome                                | Eu18000 | [X]Mental & behav dis due vol solvents: acute intoxication   |
| 32 |         |                                                         |         |                                                              |
| 33 | E021.00 | Drug-induced paranoia or hallucinatory states           | Eu18100 | [X]Mental and behav dis due volatile solvents: harmful use   |
| 34 |         |                                                         |         |                                                              |
| 35 | E021000 | Drug-induced paranoid state                             | Eu18200 | [X]Mental and behav dis due to vol solvents: dependence synd |
| 36 |         |                                                         |         |                                                              |
| 37 | E021100 | Drug-induced hallucinosis                               | Eu18211 | [X]Drug addiction - solvent                                  |
| 38 | E021z00 | Drug-induced paranoia or hallucinatory state NOS        | Eu18400 | [X]Men & beh dis vol solvents: withdrawal state wth delirium |
| 39 |         |                                                         |         |                                                              |
| 40 | E022.00 | Pathological drug intoxication                          | Eu18500 | [X]Mental & behav dis due to vol solvents: psychotic disordr |
| 41 |         |                                                         |         |                                                              |
| 42 | E023.00 | Nicotine withdrawal                                     | Eu18z00 | [X]Ment/behav dis due use vol solvents: unsp ment/behav dis  |
| 43 |         |                                                         |         |                                                              |
| 44 | E02y.00 | Other drug psychoses                                    | Eu19.00 | [X]Men & behav disorder multiple drug use/psychoactive subst |
| 45 |         |                                                         |         |                                                              |
| 46 | E02y000 | Drug-induced delirium                                   | Eu19000 | [X]Mental/behav dis multi drg use/psychoac subs: acute intox |
| 47 |         |                                                         |         |                                                              |
| 48 | E02y100 | Drug-induced dementia                                   | Eu19100 | [X]Mental and behav dis mlti drg/oth psychoa sbs: harmfl use |
| 49 |         |                                                         |         |                                                              |
| 50 | E02y300 | Drug-induced depressive state                           | Eu19200 | [X]Mental and behav dis mlti/oth psych sbs: dependence syndr |
| 51 |         |                                                         |         |                                                              |
| 52 | E02y400 | Drug-induced personality disorder                       | Eu19211 | [X]Drug addiction NOS                                        |
| 53 | E02yz00 | Other drug psychoses NOS                                | Eu19300 | [X]Mental and behav dis mlti/oth psychoa sbs: withdrwl state |
| 54 |         |                                                         |         |                                                              |
| 55 | E02z.00 | Drug psychosis NOS                                      | Eu19400 | [X]Mnt/bh dis mlti drg use/oth psy sbs: wthdr state + dlrium |
| 56 |         |                                                         |         |                                                              |
| 57 | E040.11 | Korsakoff's non-alcoholic psychosis                     | Eu19500 | [X]Ment/behav dis mlti drug use/oth psyc sbs: psychotc dis   |
| 58 |         |                                                         |         |                                                              |
| 59 | E23..00 | Alcohol dependence syndrome                             | Eu19600 | [X]Mental/behav dis multi drg use/oth psy sbs:               |

|    |         |                                                             |         |                                                                                 |
|----|---------|-------------------------------------------------------------|---------|---------------------------------------------------------------------------------|
| 1  | E23..11 | Alcoholism                                                  | Eu19700 | amnesic syndr<br>[X]Men/beh dis mlt drg use/oth subs: resid/late<br>psychot dis |
| 2  |         |                                                             |         |                                                                                 |
| 3  | E23..12 | Alcohol problem drinking                                    | Eu19y00 | [X]Men/beh dis mlt drg use/oth psy sbs: oth men<br>& behav dis                  |
| 4  |         |                                                             |         |                                                                                 |
| 5  | E230.00 | Acute alcoholic intoxication in alcoholism                  | Eu19z00 | [X]Ment/beh dis multi drug use/oth psy sbs unsp<br>mnt/beh dis                  |
| 6  |         |                                                             |         |                                                                                 |
| 7  | E230.11 | Alcohol dependence with acute alcoholic<br>intoxication     | Eu1A.00 | [X]Mental and behavioural disorders due use of<br>crack cocaine                 |
| 8  |         |                                                             |         |                                                                                 |
| 9  | E230000 | Acute alcoholic intoxication, unspecified, in<br>alcoholism | Eu1A000 | [X]Ment behav dis due use crack cocaine: acute<br>intoxication                  |
| 10 |         |                                                             |         |                                                                                 |
| 11 | E230100 | Continuous acute alcoholic intoxication in<br>alcoholism    | Eu1A100 | [X]Mental behav disorders due use crack cocaine:<br>harmful use                 |
| 12 |         |                                                             |         |                                                                                 |
| 13 | E230200 | Episodic acute alcoholic intoxication in<br>alcoholism      | Eu1A200 | [X]Mental behav disorders due use crack cocaine:<br>depend synd                 |
| 14 |         |                                                             |         |                                                                                 |
| 15 | E230300 | Acute alcoholic intoxication in remission, in<br>alcoholism | Eu1A300 | [X]Mental behav disord due crack cocaine:<br>withdrawal state                   |
| 16 |         |                                                             |         |                                                                                 |
| 17 | E230z00 | Acute alcoholic intoxication in alcoholism<br>NOS           | Eu1A500 | [X]Mental behav disord due crack cocaine:<br>psychotic disorder                 |
| 18 |         |                                                             |         |                                                                                 |
| 19 | E231.00 | Chronic alcoholism                                          | Eu1Az00 | [X]Ment behav dis due crack cocaine: unsp ment<br>and behav dis                 |
| 20 |         |                                                             |         |                                                                                 |
| 21 |         |                                                             |         |                                                                                 |
| 22 | E231.11 | Dipsomania                                                  | F11x000 | Cerebral degeneration due to alcoholism                                         |
| 23 | E231000 | Unspecified chronic alcoholism                              | F11x011 | Alcoholic encephalopathy                                                        |
| 24 | E231100 | Continuous chronic alcoholism                               | F144000 | Cerebellar ataxia due to alcoholism                                             |
| 25 | E231200 | Episodic chronic alcoholism                                 | F25B.00 | Alcohol-induced epilepsy                                                        |
| 26 | E231300 | Chronic alcoholism in remission                             | F375.00 | Alcoholic polyneuropathy                                                        |
| 27 | E231z00 | Chronic alcoholism NOS                                      | F394000 | Drug-induced myopathy                                                           |
| 28 |         |                                                             |         |                                                                                 |
| 29 | E23z.00 | Alcohol dependence syndrome NOS                             | F394100 | Alcoholic myopathy                                                              |
| 30 | E24..00 | Drug dependence                                             | G555.00 | Alcoholic cardiomyopathy                                                        |
| 31 | E24..11 | Drug addiction                                              | G852300 | Oesophageal varices in alcoholic cirrhosis of the<br>liver                      |
| 32 |         |                                                             |         |                                                                                 |
| 33 | E240.00 | Opioid type drug dependence                                 | J153.00 | Alcoholic gastritis                                                             |
| 34 | E240.11 | Heroin dependence                                           | J610.00 | Alcoholic fatty liver                                                           |
| 35 | E240.12 | Methadone dependence                                        | J611.00 | Acute alcoholic hepatitis                                                       |
| 36 | E240.13 | Morphine dependence                                         | J612.00 | Alcoholic cirrhosis of liver                                                    |
| 37 | E240.14 | Opium dependence                                            | J612000 | Alcoholic fibrosis and sclerosis of liver                                       |
| 38 | E240000 | Unspecified opioid dependence                               | J613.00 | Alcoholic liver damage unspecified                                              |
| 39 | E240100 | Continuous opioid dependence                                | J613000 | Alcoholic hepatic failure                                                       |
| 40 | E240200 | Episodic opioid dependence                                  | J617.00 | Alcoholic hepatitis                                                             |
| 41 | E240300 | Opioid dependence in remission                              | J617000 | Chronic alcoholic hepatitis                                                     |
| 42 | E240z00 | Opioid drug dependence NOS                                  | J61y.00 | Other non-alcoholic chronic liver disease                                       |
| 43 | E241.00 | Hypnotic or anxiolytic dependence                           | J670800 | Alcohol-induced acute pancreatitis                                              |
| 44 | E241.11 | Anxiolytic dependence                                       | J671000 | Alcohol-induced chronic pancreatitis                                            |
| 45 | E241.12 | Barbiturate dependence                                      | L183.00 | Drug dependence in pregnancy, childbirth and the<br>puerperium                  |
| 46 |         |                                                             |         |                                                                                 |
| 47 |         |                                                             |         |                                                                                 |
| 48 | E241.13 | Benzodiazepine dependence                                   | L183.11 | Pregnancy and drug dependence                                                   |
| 49 | E241.14 | Diazepam dependence                                         | L183100 | Drug dependence during pregnancy - baby<br>delivered                            |
| 50 |         |                                                             |         |                                                                                 |
| 51 | E241.15 | Librium dependence                                          | L183300 | Drug dependence during pregnancy - baby not yet<br>delivered                    |
| 52 |         |                                                             |         |                                                                                 |
| 53 | E241.16 | Sedative dependence                                         | L183z00 | Drug dependence during<br>pregnancy/childbirth/puerperium NOS                   |
| 54 |         |                                                             |         |                                                                                 |
| 55 | E241.17 | Valium dependence                                           | L255300 | Maternal care for (suspected) damage to fetus<br>from alcohol                   |
| 56 |         |                                                             |         |                                                                                 |
| 57 | E241000 | Hypnotic or anxiolytic dependence,<br>unspecified           | SM0..00 | Alcohol causing toxic effect                                                    |
| 58 |         |                                                             |         |                                                                                 |
| 59 |         |                                                             |         |                                                                                 |

|    |                                                                |                                                             |
|----|----------------------------------------------------------------|-------------------------------------------------------------|
| 1  | E241100 Hypnotic or anxiolytic dependence, continuous          | SM00.00 Ethyl alcohol causing toxic effect                  |
| 2  | E241200 Hypnotic or anxiolytic dependence, episodic            | SM00000 Ethanol causing toxic effect                        |
| 3  |                                                                |                                                             |
| 4  | E241300 Hypnotic or anxiolytic dependence in remission         | SM00100 Denatured alcohol causing toxic effect              |
| 5  |                                                                |                                                             |
| 6  | E241z00 Hypnotic or anxiolytic dependence NOS                  | SM00z00 Ethyl alcohol causing toxic effect NOS              |
| 7  | E242.00 Cocaine type drug dependence                           | SM01.00 Methyl alcohol causing toxic effect                 |
| 8  | E242000 Cocaine dependence, unspecified                        | SM01000 Methanol causing toxic effect                       |
| 9  | E242100 Cocaine dependence, continuous                         | SM01100 Wood alcohol causing toxic effect                   |
| 10 | E242200 Cocaine dependence, episodic                           | SM02.00 Isopropyl alcohol causing toxic effect              |
| 11 | E242300 Cocaine dependence in remission                        | SM03000 Amyl alcohol causing toxic effect                   |
| 12 | E242z00 Cocaine drug dependence NOS                            | SM03100 Butyl alcohol causing toxic effect                  |
| 13 | E243.00 Cannabis type drug dependence                          | SM0y.00 Other alcohol causing toxic effect                  |
| 14 | E243.11 Hashish dependence                                     | SM0z.00 Alcohol causing toxic effect NOS                    |
| 15 | E243.12 Hemp dependence                                        | SyuG000 [X]Toxic effect of other alcohols                   |
| 16 | E243.13 Marihuana dependence                                   | Z1Q6200 Methadone maintenance                               |
| 17 | E243000 Cannabis dependence, unspecified                       | Z1Q6214 Heroin maintenance                                  |
| 18 | E243100 Cannabis dependence, continuous                        | ZV11300 [V]Personal history of alcoholism                   |
| 19 | E243200 Cannabis dependence, episodic                          | ZV11311 [V]Problems related to lifestyle alcohol use        |
| 20 | E243300 Cannabis dependence in remission                       | ZV11400 [V]Personal history of psychoactive substance abuse |
| 21 |                                                                |                                                             |
| 22 | E243z00 Cannabis drug dependence NOS                           | ZV11500 [V]Personal history of drug abuse by injection      |
| 23 | E244.00 Amphetamine or other psychostimulant dependence        | ZV4K100 [V]Drug use                                         |
| 24 |                                                                |                                                             |
| 25 | E244.11 Psychostimulant dependence                             | ZV4KC00 [V] Alcohol use                                     |
| 26 | E244.12 Stimulant dependence                                   | E245.11 LSD dependence                                      |
| 27 | E244000 Amphetamine or psychostimulant dependence, unspecified | E245.12 Lysergic acid diethylamide dependence               |
| 28 | E244100 Amphetamine or psychostimulant dependence, continuous  | E245000 Hallucinogen dependence, unspecified                |
| 29 | E244200 Amphetamine or psychostimulant dependence, episodic    | E245100 Hallucinogen dependence, continuous                 |
| 30 | E244300 Amphetamine or psychostimulant dependence in remission | E245200 Hallucinogen dependence, episodic                   |
| 31 | E244z00 Amphetamine or psychostimulant dependence NOS          | E245300 Hallucinogen dependence in remission                |
| 32 | E244z11 Amphetamine or psychostimulant dependence NOS          | E245.00 Hallucinogen dependence                             |
| 33 |                                                                |                                                             |
| 34 |                                                                |                                                             |
| 35 |                                                                |                                                             |
| 36 |                                                                |                                                             |
| 37 |                                                                |                                                             |
| 38 |                                                                |                                                             |
| 39 |                                                                |                                                             |
| 40 |                                                                |                                                             |
| 41 |                                                                |                                                             |
| 42 |                                                                |                                                             |
| 43 |                                                                |                                                             |
| 44 |                                                                |                                                             |
| 45 |                                                                |                                                             |
| 46 |                                                                |                                                             |
| 47 |                                                                |                                                             |
| 48 |                                                                |                                                             |
| 49 |                                                                |                                                             |
| 50 |                                                                |                                                             |
| 51 |                                                                |                                                             |
| 52 |                                                                |                                                             |
| 53 |                                                                |                                                             |
| 54 |                                                                |                                                             |
| 55 |                                                                |                                                             |
| 56 |                                                                |                                                             |
| 57 |                                                                |                                                             |
| 58 |                                                                |                                                             |
| 59 |                                                                |                                                             |
| 60 |                                                                |                                                             |



**ATTEMPTED SUICIDE****At least one ICD-9 in:**

- E950 Self-inflicted poisoning
- E950.0 Self-inflicted poisoning by analgesics antipyretics and antirheumatics
  - E950.1 Self-inflicted poisoning by barbiturates
  - E950.2 Self-inflicted poisoning by other sedatives and hypnotics
  - E950.3 Self-inflicted poisoning by tranquilizers and other psychotropic agents
  - E950.4 Self-inflicted poisoning by other specified drugs and medicinal substances
  - E950.5 Self-inflicted poisoning by unspecified drug or medicinal substance
  - E950.6 Self-inflicted poisoning by agricultural and horticultural chemical and pharmaceutical preparations other than plant foods and fertilizers
  - E950.7 Self-inflicted poisoning by corrosive and caustic substances
  - E950.8 Self-inflicted poisoning by arsenic and its compounds
  - E950.9 Self-inflicted poisoning by other and unspecified solid and liquid substances
- E951 Self-inflicted poisoning
- E951.0 Self-inflicted poisoning by gas distributed by pipeline
  - E951.1 Self-inflicted poisoning by liquefied petroleum gas distributed in mobile containers
  - E951.8 Self-inflicted poisoning by other utility gas
- E952 Self-inflicted poisoning
- E952.0 Self-inflicted poisoning by motor vehicle exhaust gas
  - E952.1 Self-inflicted poisoning by other carbon monoxide
  - E952.8 Self-inflicted poisoning by other specified gases and vapors
  - E952.9 Self-inflicted poisoning by un specified gases and vapors
- E953 Self-inflicted injury by hanging, strangulation and suffocation
- E953.0 Self-inflicted injury by hanging
  - E953.1 Self-inflicted injury by suffocation by plastic bag
  - E953.8 Self-inflicted injury by other specified means
  - E953.9 Self-inflicted injury by other unspecified means
- E954 Self-inflicted injury by drowning
- E955 Self-inflicted injury by firearms and explosives
- E955.0 Self-inflicted injury by handgun
  - E955.1 Self-inflicted injury by shotgun
  - E955.2 Self-inflicted injury by hunting rifle
  - E955.3 Self-inflicted injury by military firearms
  - E955.4 Self-inflicted injury by other and unspecified firearm
  - E955.5 Self-inflicted injury by explosives
  - E955.6 Self-inflicted injury by air gun
  - E955.7 Self-inflicted injury by paintball gun
  - E955.9 Self-inflicted injury by firearms and explosives unspecified
- E956 Self-inflicted injury by cutting and piercing instrument
- E957 Self-inflicted injury by jumping from high places
- E957.0 Self-inflicted injury by jumping from residential premises
  - E957.1 Self-inflicted injuries by jumping from other man-made structures
  - E957.2 Self-inflicted injuries by jumping from natural sites
  - E957.9 Self-inflicted injuries by jumping from unspecified site
- E958 Self-inflicted injury
- E958.0 Self-inflicted injury by jumping or lying before a moving object
  - E958.1-E958.2 Self-inflicted injury by smoke, fire, flames, steam, hot vapours and

hot objects

E958.3, E958.4, E958.6-E958.9 Self-inflicted injury by other and unspecified means

E958.5 Self-inflicted injury by crashing of motor vehicle

E959 Late effects of self-inflicted injury

OR

**At least one ICD-10 in:**

X60-84 Intentional self-harm

X60 Intentional self-poisoning by and exposure to nonopioid analgesics, antipyretics and antirheumatics

X61 Intentional self-poisoning by and exposure to antiepileptic, sedative-hypnotic, antiparkinsonism and psychotropic drugs, not elsewhere classified

X62 Intentional self-poisoning by and exposure to narcotics and psychodysleptics [hallucinogens], not elsewhere classified

X63 Intentional self-poisoning by and exposure to other drugs acting on the autonomic nervous system

X64 Intentional self-poisoning by and exposure to other and unspecified drugs, medicaments and biological substances

X65 Intentional self-poisoning by and exposure to alcohol

X66 Intentional self-poisoning by and exposure to organic solvents and halogenated hydrocarbons and their vapours

X67 Intentional self-poisoning by and exposure to other gases and vapours

X68 Intentional self-poisoning by and exposure to pesticides

X69 Intentional self-poisoning by and exposure to other and unspecified chemicals and noxious substances

X70 Intentional self-harm by hanging, strangulation and suffocation

X71 Intentional self-harm by drowning and submersion

X72 Intentional self-harm by handgun discharge

X73 Intentional self-harm by rifle, shotgun and larger firearm discharge

X74 Intentional self-harm by other and unspecified firearm discharge

X75 Intentional self-harm by explosive material

X76 Intentional self-harm by smoke, fire and flames

X77 Intentional self-harm by steam, hot vapours and hot objects

X78 Intentional self-harm by sharp object

X79 Intentional self-harm by blunt object

X80 Intentional self-harm by jumping from a high place

X81 Intentional self-harm by jumping or lying before moving object

X82 Intentional self-harm by crashing of motor vehicle

X83 Intentional self-harm by other specified means

X84 Intentional self-harm by unspecified means

Y87.0 Late effects of intentional self-harm

OR

## At least one READ code in:

|          |                                                              |         |                                                              |
|----------|--------------------------------------------------------------|---------|--------------------------------------------------------------|
| SL...15  | Overdose of drug                                             | U1A4.11 | [X]Accidental poisoning with antidepressant                  |
| T8...00  | Accidental poisoning by drugs, medicines and biologicals     | T952.00 | Accidental poisoning from other fish                         |
| T91z.00  | Accidental poisoning by household agents NOS                 | ZX1C.00 | Nipping self                                                 |
| U20...11 | [X]Deliberate drug overdose / other poisoning                | ZX17.00 | Head-banging                                                 |
| T8...11  | Cause of overdose - accidental                               | T938000 | Accidental poisoning by cyanides                             |
| 1BD1.00  | Suicidal ideation                                            | U20A000 | [X]Intent self pois organ solvent,halogen hydrocarb, home    |
| T803000  | Accidental poisoning by aspirin                              | TK7z.00 | Suicide+selfinflicted injury-jump from high place NOS        |
| TK05.00  | Suicide + selfinflicted poisoning by drug or medicine NOS    | T964200 | Accidental poisoning by cadmium and its compounds            |
| T921300  | Accidental poisoning by kerosene                             | ZX1B200 | Jumping from bridge                                          |
| TK...15  | Attempted suicide                                            | T953z00 | Accidental poisoning from berries or seeds NOS               |
| T930.00  | Accidental poisoning by organochlorine insecticides          | T80y.00 | Accidental poisoning by oth analgesics,antipyretic,antirheum |
| U1A..12  | [X]Accidental drug overdose / other poisoning                | TKx0000 | Suicide + selfinflicted injury-jumping before moving object  |
| TK...17  | Para-suicide                                                 | U209z00 | [X]Intent self poison alcohol unspecif place                 |
| TK...12  | Injury - self-inflicted                                      | T930500 | Accidental poisoning by toxaphene                            |
| U2...13  | [X]Suicide                                                   | ZX11400 | Biting own arm                                               |
| 1BD3.00  | Suicidal plans                                               | T954.00 | Accidental poisoning from other plants                       |
| T924z00  | Accidental poisoning by other solvents NOS                   | T820.00 | Accidental poisoning by chloral hydrate                      |
| T81..00  | Accidental poisoning by barbiturates                         | U221.00 | [X]Intent self harm by drowning/submersn occ resid instit'n  |
| T804100  | Accidental poisoning by paracetamol                          | T935200 | Accidental poisoning by chlorates                            |
| U2E..00  | [X]Self mutilation                                           | T930100 | Accidental poisoning by chlordane                            |
| 1BD4.00  | Suicide risk                                                 | U1A0z00 | [X]Accid poison/expos to nonopioid analgesic unspecif place  |
| TK3y.00  | Suicide + selfinflicted inj oth mean hang/strangle/suffocate | U204.13 | [X]Overdose - SSRI                                           |
| TK...11  | Cause of overdose - deliberate                               | T951.00 | Accidental poisoning from shellfish                          |
| 146B.00  | H/O: deliberate self harm                                    | U2A1.00 | [X]Intent self harm by blunt object occ resident instit'n    |
| U2...15  | [X]Para-suicide                                              | T903300 | Accidental poisoning by secondary propyl alcohol             |
| 1B19.11  | Suicidal - symptom                                           | TK3z.00 | Suicide + selfinflicted inj by hang/strangle/suffocate NOS   |
| TK60111  | Slashed wrists self inflicted                                | T854.00 | Accidental poisoning by anticholinergics                     |
| ZX1..13  | Deliberate self-harm                                         | TK72.00 | Suicide+selfinflicted injury-jump from natural sites         |
| U209.00  | [X]Intent self poison/exposure to alcohol                    | U2zz.00 | [X]Intent self harm by unspecif means occ at unspecif place  |
| ZX...00  | Self-harm                                                    | U1A9z00 | [X]Accid poison/expos to alcohol unspecif place              |
| T99y000  | Accidental poisoning by chlorine                             | U409z00 | [X]Pois/expos ?intent to alcohol unspecif place              |
| TK...13  | Poisoning - self-inflicted                                   | T83yz00 | Accidental poisoning by other tranquillisers NOS             |
| U2...11  | [X]Self inflicted injury                                     | T842100 | Accidental poisoning by caffeine                             |
| 146A.00  | H/O: attempted suicide                                       | T806300 | Accidental poisoning by ibuprofen                            |
| TK60100  | Self inflicted lacerations to wrist                          | U408z00 | [X]Pois/expos ?intent to oth/unsp drug/medic unspecif place  |

|         |                                                              |         |                                                              |
|---------|--------------------------------------------------------------|---------|--------------------------------------------------------------|
| ZX17100 | Banging own head against object                              | U20y200 | [X]Int self poison unspecif chemical school/pub admin area   |
| SL...14 | Overdose of biological substance                             | U1A2.00 | [X]Accident poisoning/exposure to sedative hypnotic          |
| 1BDC.00 | Intent of deliberate self harm with detailed plans           | TK70.00 | Suicide+selfinflicted injury-jump from residential premises  |
| ZX16211 | Poking own eyes                                              | TK2..00 | Suicide + selfinflicted poisoning by other gases and vapours |
| ZX13.00 | Cutting self                                                 | T840200 | Accidental poisoning by monoamine oxidase inhibitors         |
| 1BDA.00 | Thoughts of deliberate self harm                             | T93z.00 | Accidental poisoning agricultural chemical preparations NOS  |
| ZX14200 | Pulling out sutures                                          | T832z00 | Accidental poisoning- benzodiazepine-based tranquilliser NOS |
| TK30.00 | Suicide and selfinflicted injury by hanging                  | T932.00 | Accidental poisoning by carbamates                           |
| 14K0.00 | H/O: repeated overdose                                       | TN04.00 | Injury ?accidental, poisoning by other spec drug/medicament  |
| T967.00 | Accidental poisoning by cosmetics                            | ZX1K.00 | Self-incineration                                            |
| TK00.00 | Suicide + selfinflicted poisoning by analgesic/antipyretic   | U40y400 | [X]Pois/expos ?intent unspecif chemical in street/highway    |
| TK60.00 | Suicide and selfinflicted injury by cutting                  | U40B400 | [X]Pois/expos ?intent other gas/vapour in street/highway     |
| 1B19.00 | Suicidal                                                     | T993000 | Accidental poisoning by bromobenzyl cyanide                  |
| T901.00 | Accidental poisoning by other ethyl alcohol and its products | T832100 | Accidental poisoning by diazepam                             |
| T9...00 | Accidental poisoning by other non-drug substances            | U405.00 | [X]Poisoning/exposure, ? intent, to narcotic drug            |
| TK01.00 | Suicide + selfinflicted poisoning by barbiturates            | U208000 | [X]Int self poison/exposure to oth/unsp drug/medicam home    |
| 14K..00 | H/O: poisoning                                               | T840.00 | Accidental poisoning by antidepressants                      |
| U30..11 | [X]Deliberate drug poisoning                                 | U1Ayy00 | [X]Accid pois/expos to unspecif chemical other spec place    |
| U2...00 | [X]Intentional self-harm                                     | T971.00 | Accidental poisoning by coal gas NOS                         |
| U2...14 | [X]Attempted suicide                                         | T99yz00 | Accidental poisoning by other gases and vapours NOS          |
| T955.00 | Accidental poisoning from mushrooms and other fungi          | U2A..00 | [X]Intentional self harm by blunt object                     |
| T80..00 | Accidental poisoning by analgesics,antipyretic,antirheumatic | T840000 | Accidental poisoning by amitriptyline                        |
| T88..00 | Accidental poisoning by other drugs                          | T805.00 | Accidental poisoning by pyrazole derivatives                 |
| T8z..00 | Accidental poisoning by drugs NOS                            | U2C4.00 | [X]Int self harm jump/lying befr mov obje occ street/highway |
| T840z00 | Accidental poisoning by antidepressants NOS                  | U274.00 | [X]Intent self harm by smoke fire/flame occ street/highway   |
| U1AB.11 | [X]Accidental carbon monoxide poisoning                      | U400.00 | [X]Poisoning/exposure, ? intent, to nonopioid analgesic      |
| T90..00 | Accidental poisoning by alcohol, NEC                         | U1ADz00 | [X]Acc poison by and exposure to amphetamine - unspec places |
| U200.11 | [X]Overdose - paracetamol                                    | T825.00 | Accidental poisoning by mixed sedatives NEC                  |
| 1BD8.00 | At risk of DSH - deliberate self harm                        | U1A9000 | [X]Accident poison/exposure to alcohol at home               |
| ZX13100 | Cutting own wrists                                           | T832500 | Accidental poisoning by nitrazepam                           |
| ZX1P.00 | Swallowing substances                                        | U1A2.13 | [X]Accidental poisoning with temazepam                       |
| ZX1I.00 | Self-scalding                                                | T83y.00 | Accidental poisoning by other tranquillisers                 |
| T91..00 | Accidental poisoning by household agents                     | U4A5.00 | [X]Contct wth blunt obj undet intent occ trade/service area  |

|    |         |                                                              |         |                                                              |
|----|---------|--------------------------------------------------------------|---------|--------------------------------------------------------------|
| 1  | T921200 | Accidental poisoning by petrol                               | TN0..00 | Injury ?accidental, poisoning by solid/liquid substances     |
| 2  | U2...12 | [X]Injury - self-inflicted                                   | T912.00 | Accidental poisoning by polishes                             |
| 3  | U200z00 | [X]Intent self poison nonopioid analgesic unspecif place     | T916z00 | Accidental poisoning by paint or varnish NOS                 |
| 4  |         |                                                              |         |                                                              |
| 5  | U1A..11 | [X]Accidental drug / other poisoning                         | U1A9400 | [X]Accid poison/expos alcohol in street/highway              |
| 6  |         |                                                              |         |                                                              |
| 7  | TK...14 | Suicide and self harm                                        | TN07.00 | Injury ?accidental, poisoning by agricultural chemicals      |
| 8  |         |                                                              |         |                                                              |
| 9  | TK...00 | Suicide and selfinflicted injury                             | T980100 | Accidental poisoning by butane                               |
| 10 | U200.00 | [X]Intent self poison/exposure to nonopioid analgesic        | ZX1L600 | Self-mutilation of ears                                      |
| 11 |         |                                                              |         |                                                              |
| 12 | T910.00 | Accidental poisoning by synthetic detergents and shampoos    | ZX1L500 | Enucleation of own eyes                                      |
| 13 |         |                                                              |         |                                                              |
| 14 | ZV1B200 | [V]Personal history of self-harm                             | ZX1K.11 | Setting fire to self                                         |
| 15 | TK04.00 | Suicide + selfinflicted poisoning by other drugs/medicines   | T964000 | Accidental poisoning by beryllium and its compounds          |
| 16 |         |                                                              |         |                                                              |
| 17 | ZX11.00 | Biting self                                                  | ZX1E.00 | Pinching self                                                |
| 18 | U1Ay.00 | [X]Accident poisoning/exposure to unspecif chemical          | U20Bz00 | [X]Intent self poison other gas/vapour unspecif place        |
| 19 |         |                                                              |         |                                                              |
| 20 | TK3..00 | Suicide + selfinflicted injury by hang/strangulate/suffocate | T920z00 | Accidental poisoning by petrol solvents NOS                  |
| 21 |         |                                                              |         |                                                              |
| 22 | T935.00 | Accidental poisoning by herbicides                           | U211.00 | [X]Intent self harm by hangng strangult/suffoct resid instit |
| 23 |         |                                                              |         |                                                              |
| 24 | T913z00 | Accidental poisoning by other cleaning agents NOS            | T965100 | Accidental poisoning by fertilisers                          |
| 25 |         |                                                              |         |                                                              |
| 26 | T884.00 | Accidental poisoning by gastrointestinal system drugs        | U1A3.00 | [X]Accident poisoning/exposure to antiparkinson drug         |
| 27 |         |                                                              |         |                                                              |
| 28 | T96y.00 | Accidental poisoning by other solid and liquid substances OS | T983z00 | Accidental poisoning by carbon monoxide - domestic fuel NOS  |
| 29 |         |                                                              |         |                                                              |
| 30 | TK7..00 | Suicide and selfinflicted injury by jumping from high place  | TKx5.00 | Suicide and selfinflicted injury by crashing motor vehicle   |
| 31 |         |                                                              |         |                                                              |
| 32 | U40..00 | [X]Poisoning/expos to noxious substance,undetermined intent  | T822000 | Accidental poisoning by bromides                             |
| 33 |         |                                                              |         |                                                              |
| 34 | U20A.11 | [X]Self poisoning from glue solvent                          | T930300 | Accidental poisoning by dieldrin                             |
| 35 | T970.00 | Accidental poisoning by carbon monoxide from piped gas       | T938.00 | Accidental poisoning by fumigants                            |
| 36 |         |                                                              |         |                                                              |
| 37 | U27..00 | [X]Intentional self harm by smoke, fire and flames           | U1A6.00 | [X]Accident poisoning/exposure to hallucinogen               |
| 38 |         |                                                              |         |                                                              |
| 39 | U20B.11 | [X]Self carbon monoxide poisoning                            | U40A300 | [X]Pois/exp ?intent org solvent,halogen hydrocarb,sport area |
| 40 |         |                                                              |         |                                                              |
| 41 | T95..00 | Accidental poisoning from foodstuffs and poisonous plants    | ZX1L811 | Snapping own bones                                           |
| 42 |         |                                                              |         |                                                              |
| 43 | U1A..00 | [X]Accidental poisoning by + exposure to noxious substances  | TK54.00 | Suicide and selfinflicted injury by other firearm            |
| 44 |         |                                                              |         |                                                              |
| 45 | ZX11200 | Biting own fingers                                           | T961000 | Accidental poisoning by mercury, unspecified                 |
| 46 | ZX11500 | Biting own tongue                                            | TK6z.00 | Suicide and selfinflicted injury by cutting and stabbing NOS |
| 47 |         |                                                              |         |                                                              |
| 48 | TN...11 | Poisoning undetermined - accidentally or purposely inflicted | U4C..00 | [X]Falling lying running befor/into moving obj undet intent  |
| 49 |         |                                                              |         |                                                              |
| 50 | ZX19.00 | Hitting self                                                 | T843100 | Accidental poisoning by opiate antagonists                   |
| 51 | ZX1G.00 | Scratches self                                               | TN21.00 | Injury ?accidental, poisoning by other carbon monoxide       |
| 52 |         |                                                              |         |                                                              |
| 53 | 1BD7.00 | Low suicide risk                                             | T921z00 | Accidental poisoning by petrol fuel or cleaner NOS           |
| 54 |         |                                                              |         |                                                              |
| 55 | T911.00 | Accidental poisoning by soap products                        | U1AD000 | [X]Accident poisoning by and exposure to                     |
| 56 |         |                                                              |         |                                                              |
| 57 |         |                                                              |         |                                                              |
| 58 |         |                                                              |         |                                                              |
| 59 |         |                                                              |         |                                                              |
| 60 |         |                                                              |         |                                                              |

|    |         |                                                              |         |                                                                            |
|----|---------|--------------------------------------------------------------|---------|----------------------------------------------------------------------------|
| 1  | U29..00 | [X]Intentional self harm by sharp object                     | U1A5000 | amphetamine - home<br>[X]Accident poison/exposure to narcotic drug at home |
| 2  |         |                                                              |         |                                                                            |
| 3  | TK61.00 | Suicide and selfinflicted injury by stabbing                 | U201.00 | [X]Intent self poison/exposure to antiepileptic                            |
| 4  | TK03.00 | Suicide + selfinflicted poisoning                            | TKxy.00 | Suicide and selfinflicted injury by other                                  |
| 5  |         | tranquilliser/psychotropic                                   |         | specified means                                                            |
| 6  | T842000 | Accidental poisoning by amphetamine                          | TK01000 | Suicide and self inflicted injury by                                       |
| 7  |         |                                                              |         | Amylobarbitone                                                             |
| 8  | U20..00 | [X]Intentional self poisoning/exposure to noxious substances | U201z00 | [X]Intent self poison antiepileptic unspecif place                         |
| 9  |         |                                                              |         |                                                                            |
| 10 | U40y.00 | [X]Poisoning/exposure, ? intent, to unspecif chemical        | U204z00 | [X]Intent self poison psychotropic drug unspecif place                     |
| 11 |         |                                                              |         |                                                                            |
| 12 | T953000 | Accidental poisoning from berries                            | T936000 | Accidental poisoning by organic mercurials                                 |
| 13 | TK07.00 | Suicide + selfinflicted poisoning by corrosive/caustic subst | U1A7z00 | [X]Accid poison/expos to oth autonomic drug unspecif place                 |
| 14 |         |                                                              |         |                                                                            |
| 15 | T913.00 | Accidental poisoning by other cleaning agents                | TK0z.00 | Suicide + selfinflicted poisoning by solid/liquid subst NOS                |
| 16 |         |                                                              |         |                                                                            |
| 17 | TK51.00 | Suicide and selfinflicted injury by shotgun                  | U207z00 | [X]Intent self poison oth autonomic drug unspecif place                    |
| 18 |         |                                                              |         |                                                                            |
| 19 | U45..00 | [X]Other+unspecified firearm discharge undetermined intent   | T83z.00 | Accidental poisoning by tranquilisers NOS                                  |
| 20 |         |                                                              |         |                                                                            |
| 21 | ZX1LD00 | [X]Self mutilation                                           | U402.00 | [X]Poisoning/exposure, ? intent, to sedative hypnotic                      |
| 22 |         |                                                              |         |                                                                            |
| 23 | ZX1..14 | Self-abusive behaviour                                       | T84z.00 | Accidental poisoning by psychotropic agents NOS                            |
| 24 |         |                                                              |         |                                                                            |
| 25 | ZX18.00 | Hanging self                                                 | T96..00 | Accidental poisoning by other solid and liquid substances                  |
| 26 |         |                                                              |         |                                                                            |
| 27 | U205.11 | [X]Overdose - heroin                                         | U1AA000 | [X]Accid poison/expos organ solvent,halogen hydrocarb, home                |
| 28 |         |                                                              |         |                                                                            |
| 29 | T938200 | Accidental poisoning by phosphine                            | U40B.00 | [X]Poisoning/exposure, ? intent, to other gas/vapour                       |
| 30 |         |                                                              |         |                                                                            |
| 31 | U200.13 | [X]Overdose - aspirin                                        | U1AC.12 | [X]Accidental poisoning with paraquat                                      |
| 32 | U409.00 | [X]Poisoning/exposure, ? intent, to alcohol                  | U1Ay600 | [X]Acc pois/expos unspecif chemical indust/construct area                  |
| 33 |         |                                                              |         |                                                                            |
| 34 | T955000 | Accidental poisoning from mushrooms                          | TK5..00 | Suicide and selfinflicted injury by firearms and explosives                |
| 35 |         |                                                              |         |                                                                            |
| 36 | U290.00 | [X]Intentional self harm by sharp object occurrence at home  | TN20.00 | Injury ?accidental, poisoning by motor vehicle exhaust gas                 |
| 37 |         |                                                              |         |                                                                            |
| 38 | TK0..00 | Suicide + selfinflicted poisoning by solid/liquid substances | T921.00 | Accidental poisoning by petrol fuels and cleaners                          |
| 39 |         |                                                              |         |                                                                            |
| 40 | U21..00 | [X]Intent self harm by hanging strangulation / suffocation   | U4A3.00 | [X]Contct wth blunt obj undet intent occ sport/athletic area               |
| 41 |         |                                                              |         |                                                                            |
| 42 | ZX1H100 | Self-strangulation                                           | T831000 | Accidental poisoning by haloperidol                                        |
| 43 | T916200 | Accidental poisoning by non-lead paints                      | U280.00 | [X]Intent self harm by steam hot vapour/hot obj occ at home                |
| 44 |         |                                                              |         |                                                                            |
| 45 | U1A9.00 | [X]Accident poisoning/exposure to alcohol                    | U2y0.00 | [X]Intentionl self harm by oth specif means occurrn at home                |
| 46 |         |                                                              |         |                                                                            |
| 47 | T935500 | Accidental poisoning by paraquat                             | T935z00 | Accidental poisoning by herbicides NOS                                     |
| 48 | TN1..00 | Injury ?accidental, poisoning by gases in domestic use       | T80yz00 | Accidental poisoning-oth analgesic,antipyretic,antirheum NOS               |
| 49 |         |                                                              |         |                                                                            |
| 50 | TK4..00 | Suicide and selfinflicted injury by drowning                 | U241.00 | [X]Int self harm rifl s'gun/lrg frarm disch occ resid instit               |
| 51 |         |                                                              |         |                                                                            |
| 52 | ZX1L.00 | Self-mutilation                                              | T955z00 | Accidental poisoning from mushrooms and fungi NOS                          |
| 53 |         |                                                              |         |                                                                            |
| 54 | ZX19300 | Head-hitting                                                 | U406y00 | [X]Pois/exp ?intent to hallucinogen other spec place                       |
| 55 |         |                                                              |         |                                                                            |
| 56 |         |                                                              |         |                                                                            |
| 57 |         |                                                              |         |                                                                            |
| 58 |         |                                                              |         |                                                                            |
| 59 |         |                                                              |         |                                                                            |
| 60 |         |                                                              |         |                                                                            |

|    |         |                                                              |         |                                                              |
|----|---------|--------------------------------------------------------------|---------|--------------------------------------------------------------|
| 1  | ZX1..11 | Self-destructive behaviour                                   | T935400 | Accidental poisoning by mixtures herbicides+plant food etc   |
| 2  | T92..00 | Accidental poisoning by petrol products                      | U4D3.00 | [X]Crash of motor vehicle undeterm intent sport/athlet area  |
| 3  |         |                                                              |         |                                                              |
| 4  | TK02.00 | Suicide + selfinflicted poisoning by oth sedatives/hypnotics | T82y.00 | Accidental poisoning by other sedatives and hypnotics OS     |
| 5  |         |                                                              |         |                                                              |
| 6  | T914.00 | Accidental poisoning by disinfectants                        | U20C.12 | [X]Self poisoning with paraquat                              |
| 7  | T88yz00 | Accidental poisoning by other drugs NOS                      | T940.00 | Accidental poisoning by corrosive aromatics                  |
| 8  | T961.00 | Accidental poisoning by mercury and its compounds and fumes  | TN05.00 | Injury ?accidental, poisoning by drug or medicament NOS      |
| 9  |         |                                                              |         |                                                              |
| 10 |         |                                                              |         |                                                              |
| 11 | T9z..00 | Accidental poisoning NOS                                     | T802.00 | Accidental poisoning by other opiates                        |
| 12 | T85..00 | Accidental poisoning by other drugs acting on nervous system | T841.00 | Accidental poisoning by hallucinogens                        |
| 13 |         |                                                              |         |                                                              |
| 14 | T883.00 | Accidental poisoning by cardiovascular system drugs          | U1A2.12 | [X]Accidental poisoning with diazepam                        |
| 15 |         |                                                              |         |                                                              |
| 16 | U2z..00 | [X]Intentional self harm by unspecified means                | U2A0.00 | [X]Intentional self harm by blunt object occurrence at home  |
| 17 |         |                                                              |         |                                                              |
| 18 | U1AA.11 | [X]Accidental poisoning from glue solvent                    | U208z00 | [X]Intent self poison oth/unsp drug/medic unspecif place     |
| 19 |         |                                                              |         |                                                              |
| 20 | T886.00 | Accidental poisoning by muscle + respiratory system drugs    | T991.00 | Accidental poisoning by sulphur dioxide                      |
| 21 |         |                                                              |         |                                                              |
| 22 | U204.12 | [X]Overdose - amitriptyline                                  | U409000 | [X]Poison/exposure ?intent, to alcohol at home               |
| 23 |         |                                                              |         |                                                              |
| 24 | T923000 | Accidental poisoning by paraffin wax                         | T99..00 | Accidental poisoning by other gases and vapours              |
| 25 |         |                                                              |         |                                                              |
| 26 | T902000 | Accidental poisoning by methanol                             | T850.00 | Accidental poisoning by anticonvulsant + anti-parkinson drug |
| 27 |         |                                                              |         |                                                              |
| 28 | ZX10.00 | Swallowing objects                                           | T850.11 | Accidental poisoning by anticonvulsant                       |
| 29 | ZX1L100 | Self-mutilation of hands                                     | U205z00 | [X]Intent self poison narcotic drug unspecif place           |
| 30 |         |                                                              |         |                                                              |
| 31 | ZX1..00 | Self-injurious behaviour                                     | U202z00 | [X]Intent self poison sedative hypnotic unspecif place       |
| 32 |         |                                                              |         |                                                              |
| 33 |         |                                                              |         |                                                              |
| 34 | 1BD5.00 | High suicide risk                                            | U207.00 | [X]Intent self poison/exposure to oth autonomic drug         |
| 35 |         |                                                              |         |                                                              |
| 36 | ZX1LA00 | Removing own nails                                           | U20C.00 | [X]Intent self poison/exposure to pesticide                  |
| 37 | ZX11100 | Biting own hand                                              | T964700 | Accidental poisoning by thallium compounds                   |
| 38 | ZX11300 | Biting own toes                                              | U40y600 | [X]Poison/expos ?intent unspec chemic indust/construct area  |
| 39 |         |                                                              |         |                                                              |
| 40 | U4D0.00 | [X]Crashng of motor vehicle undetermined intent occ at home  | T95y.00 | Accidental poisoning by other foods                          |
| 41 |         |                                                              |         |                                                              |
| 42 | T800.11 | Accidental poisoning by diamorphine                          | T88y000 | Accidental poisoning by central appetite depressants         |
| 43 |         |                                                              |         |                                                              |
| 44 | U2D4.00 | [X]Intent self harm by crash motor vehicl occ street/highway | T961z00 | Accidental poisoning by mercury, NOS                         |
| 45 |         |                                                              |         |                                                              |
| 46 | U208.00 | [X]Int self poison/exposure to other/unspec drug/medicament  | U1A8y00 | [X]Accid pois/expos to oth/unsp drug/medic other spec place  |
| 47 |         |                                                              |         |                                                              |
| 48 | T887000 | Accidental poisoning by skin drugs                           | ZX1K.12 | Setting self alight                                          |
| 49 | TKx2.00 | Suicide and selfinflicted injury by scald                    | U720.00 | [X]Sequelae of intentional self-harm                         |
| 50 | U4B..00 | [X]Falling jumping/pushed from high place undeterm intent    | U2yz.00 | [X]Intent self harm by oth specif means occ unspecif place   |
| 51 |         |                                                              |         |                                                              |
| 52 | TK6..00 | Suicide and selfinflicted injury by cutting and stabbing     | U202y00 | [X]Int self poison sedative hypnotic other spec place        |
| 53 |         |                                                              |         |                                                              |
| 54 | T86..00 | Accidental poisoning by antibiotics                          | U404300 | [X]Pois/exp ?intent psychotropic drug in sport/athletic area |
| 55 |         |                                                              |         |                                                              |
| 56 |         |                                                              |         |                                                              |
| 57 | T98..00 | Accidental poisoning by other utility gas + carbon monoxide  | T802z00 | Accidental poisoning by other opiates NOS                    |
| 58 |         |                                                              |         |                                                              |
| 59 |         |                                                              |         |                                                              |

|    |         |                                                             |         |                                                              |
|----|---------|-------------------------------------------------------------|---------|--------------------------------------------------------------|
| 1  | U204.00 | [X]Intent self poison/exposure to psychotropic drug         | U409200 | [X]Pois/exp ?intent alcohol school/pub admin area            |
| 2  | ZX13.11 | Cuts self                                                   | U1Ayz00 | [X]Accid poison/expos to unspecif chemical unspecif place    |
| 3  |         |                                                             | T950.00 | Accidental poisoning from meat                               |
| 4  | T966000 | Accidental poisoning by glues                               | U1A1.00 | [X]Accident poisoning/exposure to antiepileptic              |
| 5  | ZX14100 | Reopening scars                                             | T913000 | Accidental poisoning by scouring agents                      |
| 6  |         |                                                             | TK10.00 | Suicide + selfinflicted poisoning by gas via pipeline        |
| 7  | T901100 | Accidental poisoning by methylated spirit                   | TN08.00 | Injury ?accidental, poisoning by arsenic or its compounds    |
| 8  | T935300 | Accidental poisoning by diquat                              | T966y00 | Accidental poisoning by other adhesives                      |
| 9  |         |                                                             | U205y00 | [X]Int self poison narcotic drug other spec place            |
| 10 | T902.00 | Accidental poisoning by methyl alcohol                      | TK1..00 | Suicide + selfinflicted poisoning by gases in domestic use   |
| 11 |         |                                                             | U20A400 | [X]Int self poison org solvent,halogen hydrocarb,in highway  |
| 12 | 1BD6.00 | Moderate suicide risk                                       | T803z00 | Accidental poisoning by salicylates NOS                      |
| 13 | T83..00 | Accidental poisoning by tranquilisers                       | U1A2000 | [X]Accident poison/exposure to sedative hypnotic at home     |
| 14 |         |                                                             | T931300 | Accidental poisoning by malathion                            |
| 15 | U1AB.00 | [X]Accident poisoning/exposure to other gas/vapour          | TKx0.00 | Suicide + selfinflicted injury-jump/lie before moving object |
| 16 | T942z00 | Accidental poisoning by caustic alkalis NOS                 | TN1z.00 | Injury ?accidental, poisoning by gas in domestic use NOS     |
| 17 |         |                                                             | T85z.00 | Accidental poisoning by drugs acting on nervous system NOS   |
| 18 | T841000 | Accidental poisoning by cannabis derivatives                | TKx4.00 | Suicide and selfinflicted injury by electrocution            |
| 19 | ZX12.00 | Burning self                                                | T807.00 | Accidental poisoning by other non-narcotic analgesics        |
| 20 |         |                                                             | TK11.00 | Suicide + selfinflicted poisoning by liquified petrol gas    |
| 21 | U27z.00 | [X]Intent self harm by smoke fire/flames occ unspecif place | TN0z.00 | Injury ?accidental, poisoning by solid or liquid subst NOS   |
| 22 | T901300 | Accidental poisoning by ethanol, NOS                        | ZX...11 | Self-damage                                                  |
| 23 |         |                                                             | TKxz.00 | Suicide and selfinflicted injury by other means NOS          |
| 24 | T88z.00 | Accidental poisoning by unspecified drugs                   | T806.00 | Accidental poisoning by antirheumatics                       |
| 25 | ZX11600 | Biting sides of own cheeks                                  | T964600 | Accidental poisoning by nickel compounds                     |
| 26 |         |                                                             | T813.00 | Accidental poisoning by pentobarbitone                       |
| 27 | T88y.00 | Accidental poisoning by other drugs OS                      | T806z00 | Accidental poisoning by antirheumatics NOS                   |
| 28 | T937300 | Accidental poisoning by warfarin                            | ZX19100 | Punching self                                                |
| 29 |         |                                                             | U2B0.00 | [X]Intent self harm by jumping from high place occ at home   |
| 30 | U20B200 | [X]Int self poison other gas/vapour school/pub admin area   | U270.00 | [X]Intention self harm by smoke fire/flames occurrn at home  |
| 31 | U2y..00 | [X]Intentional self harm by other specified means           | U206400 | [X]Intent self pois hallucinogen in street/highway           |
| 32 |         |                                                             | C110100 | Self-induced hyperinsulinism                                 |
| 33 | T973.00 | Accidental poisoning by piped natural gas                   | T916000 | Accidental poisoning by lacquers                             |
| 34 | T93..00 | Accidental poisoning by agricultural chemical preparations  | T850z00 | Accidental poisoning by anticonvulsant/anti-                 |
| 35 | ZX13200 | Cutting own throat                                          |         |                                                              |
| 36 | T806100 | Accidental poisoning by indomethacin                        |         |                                                              |
| 37 | ZX1A.00 | Inserting foreign bodies into own orifices                  |         |                                                              |
| 38 | T924.00 | Accidental poisoning by other solvents                      |         |                                                              |
| 39 | T97..00 | Accidental poisoning by gas distributed by pipeline         |         |                                                              |
| 40 | ZX14300 | Poking fingers into wound                                   |         |                                                              |
| 41 |         |                                                             |         |                                                              |
| 42 | ZX11111 | Hand biting                                                 |         |                                                              |
| 43 |         |                                                             |         |                                                              |
| 44 | T802200 | Accidental poisoning by morphine                            |         |                                                              |
| 45 |         |                                                             |         |                                                              |
| 46 | T881.00 | Accidental poisoning by primarily systemic agents           |         |                                                              |
| 47 | U41..00 | [X]Hanging strangulation + suffocation undetermined intent  |         |                                                              |
| 48 |         |                                                             |         |                                                              |
| 49 | T900.00 | Accidental poisoning by alcoholic beverages                 |         |                                                              |
| 50 |         |                                                             |         |                                                              |
| 51 |         |                                                             |         |                                                              |
| 52 |         |                                                             |         |                                                              |
| 53 |         |                                                             |         |                                                              |
| 54 |         |                                                             |         |                                                              |
| 55 |         |                                                             |         |                                                              |
| 56 |         |                                                             |         |                                                              |
| 57 |         |                                                             |         |                                                              |
| 58 |         |                                                             |         |                                                              |
| 59 |         |                                                             |         |                                                              |



|    |         |                                                              |         |                                                               |
|----|---------|--------------------------------------------------------------|---------|---------------------------------------------------------------|
| 1  | ZV15600 | [V]Personal history of poisoning                             | T854000 | parkin drug NOS                                               |
| 2  | T98z.00 | Accidental poisoning by carbon monoxide NOS                  | T830200 | Accidental poisoning by atropine                              |
| 3  | TKz..00 | Suicide and selfinflicted injury NOS                         | T931z00 | Accidental poisoning by prochlorperazine                      |
| 4  |         |                                                              |         | Accidental poisoning by organophosphorus insecticides NOS     |
| 5  | ZX1B.00 | Jumping from height                                          | T964.00 | Accidental poisoning by other metals + compounds and fumes    |
| 6  |         |                                                              | U29y.00 | [X]Intention self harm by sharp object occ oth specif place   |
| 7  | U22..00 | [X]Intentional self harm by drowning and submersion          | T81z.00 | Accidental poisoning by barbiturates NOS                      |
| 8  | U209000 | [X]Int self poison/exposure to alcohol at home               | U28z.00 | [X]Intent self harm by steam hot vapour/obj occ unspec place  |
| 9  | U1AB600 | [X]Acc pois/expos other gas/vapour indust/construct area     | TK2z.00 | Suicide + selfinflicted poisoning by gases and vapours NOS    |
| 10 | U1ABz00 | [X]Accid poison/expos to other gas/vapour unspecif place     | U26..00 | [X]Intentional self harm by explosive material                |
| 11 | T916.00 | Accidental poisoning by other paints and varnishes           | U1A8100 | [X]Accid poison/expos to oth/unsp drug/medicam res institut   |
| 12 | U20yz00 | [X]Intent self poison unspecif chemical unspecif place       | T95z.00 | Accidental poisoning by foodstuffs and poisonous plants NOS   |
| 13 | U2C..00 | [X]Intent self harm by jumping / lying before moving object  | U207000 | [X]Int self poison/exposure to oth autonomic drug at home     |
| 14 | U2z0.00 | [X]Intentional self harm by unspecif means occurrn at home   | T936.00 | Accidental poisoning by fungicides                            |
| 15 | T981z00 | Accidental poisoning by utility gas NOS                      | U1A8z00 | [X]Accid poison/expos to oth/unsp drug/medic unspecif place   |
| 16 | U20A.00 | [X]Intentional self poison organ solvent,halogen hydrocarb   | U2Cy.00 | [X]Int self harm jump/lying bef mov obje occ oth specif plice |
| 17 | TKy..00 | Late effects of selfinflicted injury                         | T963100 | Accidental poisoning by arsenic compounds                     |
| 18 | U21z.00 | [X]Intent self harm by hangng strangul/suffoct unspecif plce | T903100 | Accidental poisoning by isopropanol                           |
| 19 | U1AD.00 | [X]Accidental poisoning by and exposure to amfetamine        | T855100 | Accidental poisoning by noradrenalin                          |
| 20 | T931.00 | Accidental poisoning by organophosphorus insecticides        | T932200 | Accidental poisoning by propoxur                              |
| 21 | U1A0000 | [X]Accident poison/exposure to nonopioid analgesic at home   | T932100 | Accidental poisoning by carbaryl                              |
| 22 | T98yz00 | Accidental poisoning by carbon monoxide from oth source NOS  | T963.00 | Accidental poisoning by arsenic and its compounds and fumes   |
| 23 | T92z.00 | Accidental poisoning by solvent NOS                          | T853.00 | Accidental poisoning by cholinergics                          |
| 24 | TK71.00 | Suicide+selfinflicted injury-jump from oth manmade structure | U2y1.00 | [X]Intent self harm by oth specif means occ resid instit'n    |
| 25 | T84..00 | Accidental poisoning by other psychotropic agents            | T98y200 | Accidental poisoning by CO - fuels in industrial use          |
| 26 | U40C.00 | [X]Poisoning/exposure, ? intent, to pesticide                | ZX1Q.11 | Jumping under train                                           |
| 27 | T915.00 | Accidental poisoning by lead paints                          | U20C.11 | [X]Self poisoning with weedkiller                             |
| 28 | U1AC.11 | [X]Accidental poisoning with weedkiller                      | T961200 | Accidental poisoning by mercury fumes                         |
| 29 | U4A..00 | [X]Contact with blunt object, undetermined intent            | ZX1H200 | Self-suffocation                                              |
| 30 | T937z00 | Accidental poisoning by rodenticides NOS                     | T916300 | Accidental poisoning by white washes                          |
| 31 | U204000 | [X]Int self poison/exposure to psychotropic drug at home     | ZX1L900 | Pulling own teeth out                                         |
| 32 | U202000 | [X]Int self poison/exposure to sedative hypnotic at home     | U294.00 | [X]Intention self harm by sharp object occ street/highway     |
| 33 | T96z.00 | Accidental poisoning by solid and liquid substances NOS      |         |                                                               |

|         |                                                                 |         |                                                                  |
|---------|-----------------------------------------------------------------|---------|------------------------------------------------------------------|
| T934.00 | Accidental poisoning by other insecticides                      | ZX1L300 | Self-mutilation of penis                                         |
| T953100 | Accidental poisoning from seeds                                 | U21y.00 | [X]Intent self harm by hangng strangul/suffocat<br>oth spec plce |
| U47..00 | [X]Exposure to smoke, fire and flames,<br>undetermined intent   | T815.00 | Accidental poisoning by quinalbarbitone                          |
| T832.00 | Accidental poisoning by benzodiazepine-based<br>tranquillisers  | U4D7.00 | [X]Crashng of motor vehicle undetermined<br>intent occ on farm   |
| T82..00 | Accidental poisoning by other sedatives and<br>hypnotics        | ZX1R.00 | Throwing self in front of vehicle                                |
| U200.12 | [X]Overdose - ibuprofen                                         | U1Ay200 | [X]Acc poison/expos unspecif chemical<br>school/pub admin area   |
| T920.00 | Accidental poisoning by petroleum solvents                      | U1A3500 | [X]Accid poison/expos antiparkinson drug<br>trade/service area   |
| ZX1B100 | Jumping from building                                           | U1A9500 | [X]Accid poison/expos alcohol trade/service<br>area              |
| U2D0.00 | [X]Intent self harm by crash of motor vehicl<br>occurrn at home | T832400 | Accidental poisoning by medazepam                                |
| ZX1F.00 | Rubbing own skin                                                | TN2..00 | Injury ?accidental, poisoning by other gases                     |
| T887300 | Accidental poisoning by otorhinolaryngological<br>drugs         | U410.00 | [X]Hanging strangulat+suffocat undet intent<br>occurrn at home   |
| T880.00 | Accidental poisoning by hormones and synthetic<br>substitutes   | T920200 | Accidental poisoning by petroleum naphtha                        |
| U1Ay000 | [X]Accident poison/exposure to unspecif<br>chemical at home     | T887z00 | Accidental poisoning by skin, eye, ENT and<br>dental drug NOS    |
| T885.00 | Accidental poisoning by water,mineral,uric acid<br>metab drugs  | U2C1.00 | [X]Int self harm jump/lying befr mov obje occ<br>resid instit'n  |
| U25..00 | [X]Intent self harm by other/unspecified firearm<br>discharge   | T921.12 | Accidental poisoning by petroleum fuels                          |
| U205.00 | [X]Intent self poison/exposure to narcotic drug                 | T940011 | Accidental poisoning by phenol                                   |
| U202.12 | [X]Overdose - diazepam                                          | U1AC000 | [X]Accident poison/exposure to pesticide at<br>home              |
| U72..00 | [X]Sequel intentn self-harm assault+event of<br>undeterm intent | TN11.00 | Injury ?accidental, poisoning by liquid petrol<br>gas            |
| ZX1LB00 | Eating own flesh                                                | U2Bz.00 | [X]Int self harm by jump from high place occ<br>unspecif place   |
| ZX17200 | Banging own head against own body parts                         | TK1z.00 | Suicide + selfinflicted poisoning by domestic<br>gases NOS       |
| T983100 | Accidental poisoning by CO- coke in domestic<br>stove/fireplace | T98y000 | Accidental poisoning by CO - blast furnace gas                   |
| U49..00 | [X]Contact with sharp object, undetermined<br>intent            | TK01400 | Suicide and self inflicted injury by<br>Phenobarbitone           |
| ZX15.00 | Drowning self                                                   | T85y.00 | Accid. poisoning by other drugs acting on<br>nervous system OS   |
| U204.11 | [X]Overdose - antidepressant                                    | U22y.00 | [X]Intent self harm by drown/submersn occ<br>oth specif place    |
| T814.00 | Accidental poisoning by phenobarbitone                          | U20Cy00 | [X]Int self poison pesticide other spec place                    |
| U1A2.11 | [X]Accidental poisoning with sleeping tablets                   | U206.00 | [X]Intent self poison/exposure to hallucinogen                   |
| TKx1.00 | Suicide and selfinflicted injury by burns or fire               | U202.18 | [X]Overdose - amobarbital                                        |
| U2B..00 | [X]Intentional self harm by jumping from a high<br>place        | T830000 | Accidental poisoning by chlorpromazine                           |
| T470.00 | Accidental poisoning by gases or fumes on ship                  | ZX16.00 | Gouging own body parts                                           |
| ZX1LC00 | Stripping own skin                                              | T807z00 | Accidental poisoning by non-narcotic<br>analgesics NOS           |
| ZRLfC12 | HoNOS item 2 - non-accidental self injury                       | T887400 | Accidental poisoning by dental drugs                             |
| ZX1L911 | Extracting own teeth                                            | U1Ay500 | [X]Accid poison/expos unspecif chemical<br>trade/service area    |

|    |         |                                                                 |         |                                                                |
|----|---------|-----------------------------------------------------------------|---------|----------------------------------------------------------------|
| 1  | 1BDB.00 | Plans for deliberate self harm without intent                   | T966.00 | Accidental poisoning by glues and adhesives                    |
| 2  | ZX11.11 | Bites self                                                      | ZX1B300 | Jumping from cliff                                             |
| 3  | U1A2.15 | [X]Accidental poisoning with nitrazepam                         | U2B6.00 | [X]Int self harm by jump from high place<br>indust/constr area |
| 4  | TKx..00 | Suicide and selfinflicted injury by other means                 | U250.00 | [X]Intent self harm oth/unspecif firearm disch<br>occ at home  |
| 5  | TH02.00 | Late effects of accidental poisoning                            | ZX1L700 | Self-inducing a prolapse                                       |
| 6  | ZX1..12 | SIB - Self-injurious behaviour                                  | T852100 | Accidental poisoning by lignocaine                             |
| 7  | T937200 | Accidental poisoning by thallium                                | U1A5z00 | [X]Accid poison/expos to narcotic drug<br>unspecif place       |
| 8  | T981400 | Accidental poisoning by cooking gas NOS                         | U409400 | [X]Pois/expos ?intent alcohol in<br>street/highway             |
| 9  | T921100 | Accidental poisoning by gas oils                                | U2zy.00 | [X]Intent self harm by unspecif means occ oth<br>specif place  |
| 10 | T965000 | Accidental poisoning by plant food                              | ZX1L800 | Breaking own bones                                             |
| 11 | U202.16 | [X]Overdose - benzodiazepine                                    | TKx7.00 | Suicide and selfinflicted injury caustic subst,<br>excl poison |
| 12 | ZX1N.00 | Stabbing self                                                   | U200y00 | [X]Int self poison nonopioid analgesic other<br>spec place     |
| 13 | T803.00 | Accidental poisoning by salicylates                             | U204y00 | [X]Int self poison psychotropic drug other spec<br>place       |
| 14 | TK20.00 | Suicide + selfinflicted poisoning by motor veh<br>exhaust gas   | T852.00 | Accidental poisoning by local anaesthetic                      |
| 15 | T99y.00 | Accidental poisoning by other gases and vapours<br>OS           | U408000 | [X]Poison/exposure ?intent, to oth/unsp<br>drug/medicam home   |
| 16 | U200000 | [X]Int self poison/exposure to nonopioid<br>analgesic at home   | U202400 | [X]Intent self pois sedative hypnotic in<br>street/highway     |
| 17 | U1A5.00 | [X]Accident poisoning/exposure to narcotic drug                 | U1ABy00 | [X]Accid pois/expos to other gas/vapour other<br>spec place    |
| 18 | TK1y.00 | Suicide and selfinflicted poisoning by other utility<br>gas     | U200500 | [X]Intent self pois nonopioid analgesic<br>trade/service area  |
| 19 | T953.00 | Accidental poisoning from berries and seeds                     | U208400 | [X]Intent self pois oth/unsp drug/medic in<br>street/highway   |
| 20 | U202.17 | [X]Overdose - barbiturate                                       | U200100 | [X]Intent self poison nonopioid analgesic at res<br>institut   |
| 21 | U1A0.11 | [X]Accidental poisoning with paracetamol                        | U20C000 | [X]Int self poison/exposure to pesticide at<br>home            |
| 22 | T955y00 | Accidental poisoning from other fungi                           | U402z00 | [X]Pois/expos ?intent to sedative hypnotic<br>unspecif place   |
| 23 | T852000 | Accidental poisoning by cocaine                                 | U208y00 | [X]Int self poison oth/unsp drug/medic other<br>spec place     |
| 24 | T942000 | Accidental poisoning by sodium hydroxide                        | U209y00 | [X]Int self poison alcohol other spec place                    |
| 25 | U1A0.00 | [X]Accident poisoning/exposure to nonopioid<br>analgesic        | U2z2.00 | [X]Intent self harm by unsp mean occ<br>sch/ins/pub adm area   |
| 26 | T941000 | Accidental poisoning by hydrochloric acid                       | ZX16100 | Gouging own flesh                                              |
| 27 | ZX1J.00 | Self-electrocution                                              | T841z00 | Accidental poisoning by hallucinogen NOS                       |
| 28 | T854200 | Accidental poisoning by hyoscine                                | T982z00 | Accidental poisoning by exhaust gas from<br>motor vehicle NOS  |
| 29 | TN00.00 | Injury ?accidental, poisoning by analgesic or anti-<br>pyretic  | T964500 | Accidental poisoning by manganese and its<br>compounds         |
| 30 | T80z.00 | Accidental poisoning by<br>analgesics,antipyretic,antirheum NOS | U404.00 | [X]Poisoning/exposure, ? intent, to<br>psychotropic drug       |
| 31 | ZX19200 | Slapping self                                                   | U22z.00 | [X]Intent self harm by drown/submersn occ<br>unspecified place |
| 32 | U1A7.00 | [X]Accident poisoning/exposure to oth autonomic<br>drug         | T94y.00 | Accidental poisoning by other corrosives and<br>caustics       |

|    |         |                                                              |         |                                                              |
|----|---------|--------------------------------------------------------------|---------|--------------------------------------------------------------|
| 1  | U1A0.12 | [X]Accidental poisoning with ibuprofen                       | U20Az00 | [X]Int self pois org solv,halogen hydrocarb, unspec place    |
| 2  | U408.00 | [X]Poison/exposure, ?intent, to other/unspec drug/medicament | ZV71600 | [V]Observation following other inflicted injury              |
| 3  | U48..00 | [X]Contact with steam hot vapours+objects undetermn intent   | T830z00 | Accidental poisoning- phenothiazine-based tranquilisers NOS  |
| 4  | T982100 | Accidental poisoning by exhaust gas from gas engine          | T924000 | Accidental poisoning by benzene                              |
| 5  | ZX15.00 | Throwing self onto floor                                     | ZVu0600 | [X]Examination & observat following other inflicted injury   |
| 6  | U24..00 | [X]Intent self harm by rifle shotgun/larger firearm disch    | TKx3.00 | Suicide and selfinflicted injury by extremes of cold         |
| 7  | T942.00 | Accidental poisoning by caustic alkalis                      | T964100 | Accidental poisoning by brass fumes                          |
| 8  | U202.00 | [X]Intent self poison/exposure to sedative hypnotic          | T960000 | Accidental poisoning by lead, unspecified                    |
| 9  | U20B.00 | [X]Intent self poison/exposure to other gas/vapour           | U40yz00 | [X]Pois/expos ?intent to unspecif chemical unspecif place    |
| 10 | TK21.00 | Suicide and selfinflicted poisoning by other carbon monoxide | T980200 | Accidental poisoning by propane                              |
| 11 | U1A5.11 | [X]Accidental poisoning with heroin                          | T983.00 | Accidental poisoning by carbon monoxide- other domestic fuel |
| 12 | U20y000 | [X]Int self poison/exposure to unspecif chemical at home     | U204100 | [X]Intent self poison psychotropic drug at res institut      |
| 13 | ZC15100 | Repeated self-induced vomiting                               | T964z00 | Accidental poisoning by metals + compounds and fumes NOS     |
| 14 | U202.13 | [X]Overdose - temazepam                                      | U1AA100 | [X]Acc poison/expos org solvent,halogen hydrocarb,res instit |
| 15 | T802000 | Accidental poisoning by codeine                              | ZX1Q.00 | Throwing self in front of train                              |
| 16 | T82z.00 | Accidental poisoning by sedatives and hypnotics NOS          | T851.00 | Accidental poisoning by oth central nervous syst depressants |
| 17 | T94..00 | Accidental poisoning by corrosives and caustics NEC          | T806200 | Accidental poisoning by naproxen                             |
| 18 | TK31.00 | Suicide + selfinflicted injury by suffocation by plastic bag | TK01100 | Suicide and self inflicted injury by Barbitone               |
| 19 | U1A4.13 | [X]Accidental poisoning with SSRI                            | T990.00 | Accidental poisoning by nitrogen oxides                      |
| 20 | T960.00 | Accidental poisoning by lead and its compounds and fumes     | T963000 | Accidental poisoning by arsenic, unspecified                 |
| 21 | U1AB700 | [X]Accident poison/exposure to other gas/vapour on farm      | 14K1.00 | Intentional overdose of prescription only medication         |
| 22 | T941.00 | Accidental poisoning by acids                                | U212.00 | [X]Inten slf harm hang strang/suffc sch oth ins/pub adm area |
| 23 | TN06.00 | Injury ?accidental, poisoning by corrosive/caustic substance | T802300 | Accidental poisoning by opium                                |
| 24 | U470.00 | [X]Exposure to smoke fire+flame undeterm intent occ at home  | U1AD200 | [X]Acc pois/expo to amphet - sch, other inst+pub admin area  |
| 25 | T981.00 | Accidental poisoning by other utility gas                    | T98y.00 | Accidental poisoning by carbon monoxide from other sources   |
| 26 | U4D..00 | [X]Crashing of motor vehicle, undetermined intent            | T802100 | Accidental poisoning by pethidine                            |
| 27 | U49z.00 | [X]Contact with sharp obj undeterm intent occ unspecif place | T983300 | Accidental poisoning by CO- kerosene in domestic stove/fire  |
| 28 | U42..00 | [X]Drowning and submersion, undetermined intent              | U4Bz.00 | [X]Fall jump/push frm high plce undt intnt occ unspecif plce |
| 29 | TK06.00 | Suicide + selfinflicted poisoning by agricultural chemical   | T850.12 | Accidental poisoning by anti-parkinsonism drug               |
| 30 | U40A.00 | [X]Pois/exposure,?intent,to organ                            | T98y100 | Accidental poisoning by CO - kiln vapour                     |

|    |         |                                                                                   |         |                                                              |
|----|---------|-----------------------------------------------------------------------------------|---------|--------------------------------------------------------------|
| 1  | U205000 | solvent,halogen hydrocarb<br>[X]Int self poison/exposure to narcotic drug at home | T830.00 | Accidental poisoning by phenothiazine-based tranquillisers   |
| 2  |         |                                                                                   |         |                                                              |
| 3  | U1AB000 | [X]Accident poison/exposure to other gas/vapour at home                           | U2By.00 | [X]Int self harm by jump from high place oth specif plce     |
| 4  |         |                                                                                   |         |                                                              |
| 5  | U29z.00 | [X]Intentional self harm by sharp object occ unspecif place                       | T941z00 | Accidental poisoning by acids NOS                            |
| 6  |         |                                                                                   |         |                                                              |
| 7  | U1A4100 | [X]Accid poison/expos to psychotropic drug at res institut                        | U1A2.16 | [X]Accidental poisoning with benzodiazepine                  |
| 8  |         |                                                                                   |         |                                                              |
| 9  | T832000 | Accidental poisoning by chlordiazepoxide                                          | T936z00 | Accidental poisoning by fungicides NOS                       |
| 10 | U291.00 | [X]Intent self harm by sharp object occ resident instit'n                         | TK5z.00 | Suicide and selfinflicted injury by firearms/explosives NOS  |
| 11 |         |                                                                                   |         |                                                              |
| 12 | U202.15 | [X]Overdose - nitrazepam                                                          | T930200 | Accidental poisoning by DDT                                  |
| 13 | U1A8000 | [X]Accident poison/exposure to oth/unsp drug/medicam home                         | U1A1000 | [X]Accident poison/exposure to antiepileptic at home         |
| 14 |         |                                                                                   |         |                                                              |
| 15 | U20B000 | [X]Int self poison/exposure to other gas/vapour at home                           | T811.00 | Accidental poisoning by barbitone                            |
| 16 |         |                                                                                   |         |                                                              |
| 17 | U1AC.00 | [X]Accident poisoning/exposure to pesticide                                       | T901z00 | Accidental poisoning by ethyl alcohol NOS                    |
| 18 | T882.00 | Accidental poisoning by drugs affecting blood constituents                        | U200400 | [X]Intent self pois nonopioid analgesic in street/highway    |
| 19 |         |                                                                                   |         |                                                              |
| 20 | T90y.00 | Accidental poisoning by other alcohols                                            | T923.00 | Accidental poisoning by petroleum solids                     |
| 21 | U201000 | [X]Int self poison/exposure to antiepileptic at home                              | TKx6.00 | Suicide and selfinflicted injury by crashing of aircraft     |
| 22 |         |                                                                                   |         |                                                              |
| 23 | ZX14.00 | Damaging own wounds                                                               | U2D6.00 | [X]Intent self harm crash motor vehic occ indust/constr area |
| 24 |         |                                                                                   |         |                                                              |
| 25 | U2A3.00 | [X]Intent self harm by blunt object occ sports/athlet area                        | U4Az.00 | [X]Contact with blunt obj undeterm intent occ unspecif place |
| 26 |         |                                                                                   |         |                                                              |
| 27 | T941200 | Accidental poisoning by sulphuric acid                                            | U40C000 | [X]Poison/exposure ?intent, to pesticide at home             |
| 28 |         |                                                                                   |         |                                                              |
| 29 | T937400 | Accidental poisoning by zinc phosphide                                            | T923z00 | Accidental poisoning by petrol solids NOS                    |
| 30 | U1A0.13 | [X]Accidental poisoning with aspirin                                              | U4B6.00 | [X]Fall jump/push frm high plce undt intr indust/constr area |
| 31 |         |                                                                                   |         |                                                              |
| 32 | U1AA.00 | [X]Accid poison/exposure to organ solvent,halogen hydrocarb                       | U206000 | [X]Int self poison/exposure to hallucinogen at home          |
| 33 |         |                                                                                   |         |                                                              |
| 34 | T960z00 | Accidental poisoning by lead, NOS                                                 | U40y000 | [X]Poison/exposure ?intent, to unspecif chemical at home     |
| 35 |         |                                                                                   |         |                                                              |
| 36 | U210.00 | [X]Intent self harm by hanging strangulat/suffocat occ home                       | U220.00 | [X]Intent self harm by drowning/submersion occurrn at home   |
| 37 |         |                                                                                   |         |                                                              |
| 38 | T800.00 | Accidental poisoning by heroin                                                    | U1Ay700 | [X]Accident poison/exposure to unspecif chemical on farm     |
| 39 |         |                                                                                   |         |                                                              |
| 40 | T94z.00 | Accidental poisoning by corrosives and caustics NOS                               | U40yy00 | [X]Pois/exp ?intent to unspecif chemical other spec place    |
| 41 |         |                                                                                   |         |                                                              |
| 42 | U1A8.00 | [X]Accident poison/exposure to other/unspec drug/medicament                       | T941100 | Accidental poisoning by nitric acid                          |
| 43 |         |                                                                                   |         |                                                              |
| 44 | U20By00 | [X]Int self poison other gas/vapour other spec place                              | U1A9200 | [X]Acc poison/expos alcohol school/pub admin area            |
| 45 |         |                                                                                   |         |                                                              |
| 46 | T938100 | Accidental poisoning by methyl bromide                                            | ZX16300 | Gouging own rectum                                           |
| 47 | U1A4.12 | [X]Accidental poisoning with amitriptyline                                        | T830300 | Accidental poisoning by promazine                            |
| 48 | ZX1M.00 | Shooting self                                                                     | U216.00 | [X]Intent self harm by hang strangl/suffc indust/constr area |
| 49 |         |                                                                                   |         |                                                              |
| 50 | U44..00 | [X]Rifle shotgun+larger firearm discharge undeterm intent                         | T887200 | Accidental poisoning by ophthalmological drugs               |
| 51 |         |                                                                                   |         |                                                              |
| 52 | T922.00 | Accidental poisoning by lubricating oils                                          | 1BDE.00 | Suicide risk increased from previous level                   |
| 53 | T964400 | Accidental poisoning by iron compounds                                            | ZX1R.11 | Jumping in front of vehicle                                  |
| 54 | T964300 | Accidental poisoning by copper salts                                              | U1A9300 | [X]Accid pois/expos alcohol in sport/athletic area           |
| 55 |         |                                                                                   |         |                                                              |
| 56 |         |                                                                                   |         |                                                              |
| 57 |         |                                                                                   |         |                                                              |
| 58 |         |                                                                                   |         |                                                              |
| 59 |         |                                                                                   |         |                                                              |

|    |         |                                                     |         |                                                   |
|----|---------|-----------------------------------------------------|---------|---------------------------------------------------|
| 1  | T887100 | Accidental poisoning by mucous membrane drugs       | U1A9y00 | [X]Accid pois/expos to alcohol other spec place   |
| 2  | U202.11 | [X]Overdose - sleeping tabs                         | TN02.00 | Injury ?accidental, poisoning by other            |
| 3  |         |                                                     |         | sedative/hypnotic                                 |
| 4  | T90z.00 | Accidental poisoning by alcohol NOS                 | T806000 | Accidental poisoning by gold salts                |
| 5  | T981300 | Accidental poisoning by heating gas NOS             | T937100 | Accidental poisoning by squill and derivatives    |
| 6  | T801.00 | Accidental poisoning by methadone                   | T965z00 | Accidental poisoning by plant foods and           |
| 7  |         |                                                     |         | fertilisers NOS                                   |
| 8  | T841100 | Accidental poisoning by lysergide, LSD              | T823.00 | Accidental poisoning by methaqualone              |
| 9  |         |                                                     |         | compounds                                         |
| 10 | T840100 | Accidental poisoning by imipramine                  | U1A8600 | [X]Acc pois/expos oth/unsp drug/medic             |
| 11 |         |                                                     |         | indust/construct area                             |
| 12 | U2B4.00 | [X]Intent self harm by jump from high place occ     | T966z00 | Accidental poisoning by glues and adhesives       |
| 13 |         | street/h'way                                        |         | NOS                                               |
| 14 | TN2y.00 | Injury ?accidental, poisoning by other spec gas or  | TK2y.00 | Suicide + selfinflicted poisoning by other gases  |
| 15 |         | vapour                                              |         | and vapours                                       |
| 16 | U4A0.00 | [X]Contact wth blunt object undetermined intent     | T832300 | Accidental poisoning by lorazepam                 |
| 17 |         | occ at home                                         |         |                                                   |
| 18 | TK52.00 | Suicide and selfinflicted injury by hunting rifle   | T822.00 | Accidental poisoning by bromine compounds         |
| 19 | U242.00 | [X]Int slf hrm rifl s'gun/lrg frarm dis sch/ins/pub | T804.00 | Accidental poisoning by aromatic analgesics       |
| 20 |         | adm area                                            |         | NEC                                               |
| 21 | U28..00 | [X]Intentional self harm by steam hot vapours /     | T80y000 | Accidental poisoning by pentazocine               |
| 22 |         | hot objects                                         |         |                                                   |
| 23 | U2D..00 | [X]Intentional self harm by crashing of motor       | U4A6.00 | [X]Contct wth blunt obj undet intent occ          |
| 24 |         | vehicle                                             |         | industr/constr area                               |
| 25 | ZX1H.00 | Self-asphyxiation                                   | U2y6.00 | [X]Intent self harm oth specif means occ          |
| 26 |         |                                                     |         | industr/constr area                               |
| 27 | T983000 | Accidental poisoning by CO- coal in domestic        | U200600 | [X]Int self pois nonopioid analgesic              |
| 28 |         | stove/fireplace                                     |         | indust/construct area                             |
| 29 | T87..00 | Accidental poisoning by anti-infectives             | TN01300 | Injury ?accidental poisoning by Pentobarbitone    |
| 30 | T77z.00 | Accident/poisoning occurred in residential          | U1A2z00 | [X]Accid poison/expos to sedative hypnotic        |
| 31 |         | institution NOS                                     |         | unspecif place                                    |
| 32 | U20y.00 | [X]Intent self poison/exposure to unspecif          | TK01z00 | Suicide and self inflicted injury by barbiturates |
| 33 |         | chemical                                            |         |                                                   |
| 34 | T937.00 | Accidental poisoning by rodenticides                | TKx0z00 | Suicide + selfinflicted inj-jump/lie before       |
| 35 |         |                                                     |         | moving obj NOS                                    |
| 36 | T934z00 | Accidental poisoning by insecticides NOS            | T805100 | Accidental poisoning by phenylbutazone            |
| 37 | U1A4.00 | [X]Accident poisoning/exposure to psychotropic      | U1A4200 | [X]Acc poison/expos psychotropic drug             |
| 38 |         | drug                                                |         | school/pub admin area                             |
| 39 | U1A4000 | [X]Accident poison/exposure to psychotropic         | U2Dz.00 | [X]Intent self harm by crash motor vehic occ      |
| 40 |         | drug at home                                        |         | unspecif place                                    |
| 41 | ZX1L200 | Self-mutilation of genitalia                        | T804200 | Accidental poisoning by phenacetin                |
| 42 | T855000 | Accidental poisoning by adrenalin                   | 1BDF.00 | Suicide risk unchanged from previous level        |
| 43 | T99z.00 | Accidental poisoning by gases and vapours NOS       | U40By00 | [X]Pois/exp ?intent to other gas/vapour other     |
| 44 |         |                                                     |         | spec place                                        |
| 45 | T982.00 | Accidental poisoning by motor vehicle exhaust       | T993.00 | Accidental poisoning by tear gas                  |
| 46 |         | gas                                                 |         |                                                   |
| 47 | ZX16200 | Gouging own eyes                                    | U1Ay100 | [X]Accid poison/expos to unspecif chemical at     |
| 48 |         |                                                     |         | res institut                                      |
| 49 | T940000 | Accidental poisoning by carbolic acid               | U2yy.00 | [X]Intent self harm oth specif means occ oth      |
| 50 |         |                                                     |         | specif place                                      |

**PAIN****At least one ICD-9 in:**

|                                                                   |                                                                                                                                                                                                                                                                                                                                                                                                                             |
|-------------------------------------------------------------------|-----------------------------------------------------------------------------------------------------------------------------------------------------------------------------------------------------------------------------------------------------------------------------------------------------------------------------------------------------------------------------------------------------------------------------|
| Lumbar pain                                                       | 724                                                                                                                                                                                                                                                                                                                                                                                                                         |
| Back disorders                                                    | 721, 722, 723, 723, 737                                                                                                                                                                                                                                                                                                                                                                                                     |
| Neck and back problems                                            | 721.0, 721.1, 721.2, 721.3, 721.4, 721.5, 721.6, 721.7, 721.8, 721.9, 722.0, 722.1, 722.2, 722.3, 722.4, 722.5, 722.6, 722.7, 722.8, 722.9, 723.0, 723.1, 723.2, 723.3, 723.4, 723.5, 723.7, 723.8, 723.9, 724.0, 724.1, 724.2, 724.3, 724.4, 724.5, 724.6, 724.8, 724.9, 737.1, 737.2, 738.2, 738.4, 738.5, 739.1, 739.2, 739.3, 739.4, 756.1, 846.0, 846.1, 846.2, 846.3, 846.8, 846.9, 847.0, 847.1, 847.2, 847.3, 847.9 |
| Complex regional pain syndrome                                    | 337.2, 354.4, 355.7, 355.9                                                                                                                                                                                                                                                                                                                                                                                                  |
| Fibromyalgia                                                      | 729.1                                                                                                                                                                                                                                                                                                                                                                                                                       |
| Painful neuropathic disorders                                     | 250.6, 357.2, 053.1, 722.1, 722.2, 722.7, 724.0, 724.3, 724.4, 721.1, 722.0, 723.0, 723.4, 337.2, 353.2, 353.3, 353.4, 354.4, 355.7, 355.9, 729.2, 353.6, 350.1, 350.2, 352.1, 353.0, 353.1, 353.8, 353.9, 354.0, 354.1, 354.2, 354.3, 354.5, 354.8, 354.9, 355.0, 355.1, 355.2, 355.3, 355.4, 355.5, 355.6, 355.8,                                                                                                         |
| Pain                                                              | 338                                                                                                                                                                                                                                                                                                                                                                                                                         |
| Chronic pain                                                      | 338.2                                                                                                                                                                                                                                                                                                                                                                                                                       |
| Chronic pain associated with significant psychosocial dysfunction | 338.4                                                                                                                                                                                                                                                                                                                                                                                                                       |
| Pain disorders related to psychological factors                   | 307.8                                                                                                                                                                                                                                                                                                                                                                                                                       |
| Migraine and headache                                             | 346, 784, 339                                                                                                                                                                                                                                                                                                                                                                                                               |
| Osteoarthritis/Rheumatoid Arthritis                               | 714, 715                                                                                                                                                                                                                                                                                                                                                                                                                    |
| Irritable bowel syndrome                                          | 564.1                                                                                                                                                                                                                                                                                                                                                                                                                       |
| Lupus                                                             | 710.0                                                                                                                                                                                                                                                                                                                                                                                                                       |

OR

**At least one READ code in:**

|         |                                            |         |                                                 |
|---------|--------------------------------------------|---------|-------------------------------------------------|
| N131.00 | cervicalgia - pain in neck                 | N05..00 | osteoarthritis and allied disorders             |
| 1B1G.00 | headache                                   | N217700 | calcaneal spur                                  |
| 1BA5.00 | frontal headache                           | N23y400 | spasm of muscle                                 |
| F26..00 | migraine                                   | F260.00 | classical migraine                              |
| E278100 | tension headache                           | N224.00 | ganglion and cyst of synovium, tendon and bursa |
| N143.00 | sciatica                                   | N081000 | loose body in joint, unspecified joint          |
| N216500 | prepatellar bursitis                       | PG17.00 | spina bifida occulta                            |
| J521.11 | irritable bowel syndrome                   | 1BA8.00 | temporal headache                               |
| N090.00 | effusion of joint                          | N140.11 | spinal stenosis                                 |
| N213300 | olecranon bursitis                         | N235.00 | hypermobility syndrome                          |
| N145.00 | backache, unspecified                      | N37..00 | curvature of spine                              |
| N12..00 | intervertebral disc disorders              | N225100 | rupture of popliteal space synovial cyst        |
| N217900 | plantar fasciitis                          | F26y000 | hemiplegic migraine                             |
| F340.00 | carpal tunnel syndrome                     | 1B1G000 | sinus headache                                  |
| N040.00 | rheumatoid arthritis                       | N066.00 | unspecified monoarthritis                       |
| J521.00 | irritable colon - irritable bowel syndrome | 7H48211 | release of trigger finger                       |
| N224A00 | synovial cyst of popliteal space           | N01w.00 | reactive arthropathy, unspecified               |
| N371.00 | acquired kyphosis                          | F330.00 | brachial plexus lesions                         |
| N21z300 | exostosis of unspecified site              | N224000 | synovial cyst unspecified                       |
| N221.00 | bunion                                     | N043.00 | juvenile rheumatoid arthritis - still's         |

|    |         |                                      |         |                                                |
|----|---------|--------------------------------------|---------|------------------------------------------------|
| 1  | R040.00 | [d]headache                          | SC20z12 | disease                                        |
| 2  | N220.00 | synovitis and tenosynovitis          | F355.00 | headache - post traumatic                      |
| 3  | N20..00 | polymyalgia rheumatica               | N224200 | tarsal tunnel syndrome                         |
| 4  | F301.00 | other specified trigeminal neuralgia | N083.00 | ganglion of tendon sheath                      |
| 5  | N142.14 | lumbago                              | N245.00 | recurrent dislocation of joint                 |
| 6  | 1BA6.00 | occipital headache                   | N21..00 | pain in limb                                   |
| 7  |         |                                      |         | peripheral enthesopathies and allied syndromes |
| 8  | N372.00 | acquired lordosis                    | PG16.00 | klippel-feil syndrome                          |
| 9  | PG12.00 | congenital spondylolisthesis         | N213200 | lateral epicondylitis of the elbow             |
| 10 | N11..00 | spondylosis and allied disorders     | N221000 | infected bunion                                |
| 11 | N244.00 | fasciitis unspecified                | N141.00 | pain in thoracic spine                         |
| 12 | N220300 | trigger finger - acquired            | 1BB4.00 | morning headache                               |
| 13 | F261.00 | common migraine                      | F262200 | abdominal migraine                             |
| 14 | F262000 | cluster headache                     | N110.00 | cervical spondylosis without myelopathy        |
| 15 | N370.00 | adolescent postural kyphosis         | N384.00 | acquired spondylolisthesis                     |
| 16 | N07..00 | internal derangement of knee         | 7K51111 | unionectomy                                    |
| 17 | N234.00 | laxity of ligament                   |         |                                                |



## STROBE Statement—checklist of items that should be included in reports of observational studies

|                              | Item No | Recommendation                                                                                                                                                                                                                                                                                                                                                                                                                                                         | Page No |
|------------------------------|---------|------------------------------------------------------------------------------------------------------------------------------------------------------------------------------------------------------------------------------------------------------------------------------------------------------------------------------------------------------------------------------------------------------------------------------------------------------------------------|---------|
| <b>Title and abstract</b>    | 1       | (a) Indicate the study's design with a commonly used term in the title or the abstract                                                                                                                                                                                                                                                                                                                                                                                 | 2       |
|                              |         | (b) Provide in the abstract an informative and balanced summary of what was done and what was found                                                                                                                                                                                                                                                                                                                                                                    | 2       |
| <b>Introduction</b>          |         |                                                                                                                                                                                                                                                                                                                                                                                                                                                                        |         |
| Background/rationale         | 2       | Explain the scientific background and rationale for the investigation being reported                                                                                                                                                                                                                                                                                                                                                                                   | 4-5     |
| Objectives                   | 3       | State specific objectives, including any prespecified hypotheses                                                                                                                                                                                                                                                                                                                                                                                                       | 4-5     |
| <b>Methods</b>               |         |                                                                                                                                                                                                                                                                                                                                                                                                                                                                        |         |
| Study design                 | 4       | Present key elements of study design early in the paper                                                                                                                                                                                                                                                                                                                                                                                                                | 5-7     |
| Setting                      | 5       | Describe the setting, locations, and relevant dates, including periods of recruitment, exposure, follow-up, and data collection                                                                                                                                                                                                                                                                                                                                        | 5-6     |
| Participants                 | 6       | (a) <i>Cohort study</i> —Give the eligibility criteria, and the sources and methods of selection of participants. Describe methods of follow-up<br><i>Case-control study</i> —Give the eligibility criteria, and the sources and methods of case ascertainment and control selection. Give the rationale for the choice of cases and controls<br><i>Cross-sectional study</i> —Give the eligibility criteria, and the sources and methods of selection of participants | 5-6     |
|                              |         | (b) <i>Cohort study</i> —For matched studies, give matching criteria and number of exposed and unexposed<br><i>Case-control study</i> —For matched studies, give matching criteria and the number of controls per case                                                                                                                                                                                                                                                 |         |
| Variables                    | 7       | Clearly define all outcomes, exposures, predictors, potential confounders, and effect modifiers. Give diagnostic criteria, if applicable                                                                                                                                                                                                                                                                                                                               | 7       |
| Data sources/<br>measurement | 8*      | For each variable of interest, give sources of data and details of methods of assessment (measurement). Describe comparability of assessment methods if there is more than one group                                                                                                                                                                                                                                                                                   | 5-7     |
| Bias                         | 9       | Describe any efforts to address potential sources of bias                                                                                                                                                                                                                                                                                                                                                                                                              | 8       |
| Study size                   | 10      | Explain how the study size was arrived at                                                                                                                                                                                                                                                                                                                                                                                                                              | N/A     |
| Quantitative variables       | 11      | Explain how quantitative variables were handled in the analyses. If applicable, describe which groupings were chosen and why                                                                                                                                                                                                                                                                                                                                           | 7-8     |
| Statistical methods          | 12      | (a) Describe all statistical methods, including those used to control for confounding                                                                                                                                                                                                                                                                                                                                                                                  | 8       |
|                              |         | (b) Describe any methods used to examine subgroups and interactions                                                                                                                                                                                                                                                                                                                                                                                                    | N/A     |
|                              |         | (c) Explain how missing data were addressed                                                                                                                                                                                                                                                                                                                                                                                                                            | N/A     |
|                              |         | (d) <i>Cohort study</i> —If applicable, explain how loss to follow-up was addressed<br><i>Case-control study</i> —If applicable, explain how matching of cases and controls was addressed                                                                                                                                                                                                                                                                              | N/A     |
|                              |         | (e) <i>Cross-sectional study</i> —If applicable, describe analytical methods taking account of sampling strategy<br>(e) Describe any sensitivity analyses                                                                                                                                                                                                                                                                                                              | N/A     |

| <b>Results</b>           |     |                                                                                                                                                                                                              | <b>Page No</b> |
|--------------------------|-----|--------------------------------------------------------------------------------------------------------------------------------------------------------------------------------------------------------------|----------------|
| Participants             | 13* | (a) Report numbers of individuals at each stage of study—eg numbers potentially eligible, examined for eligibility, confirmed eligible, included in the study, completing follow-up, and analysed            | N/A            |
|                          |     | (b) Give reasons for non-participation at each stage                                                                                                                                                         | N/A            |
|                          |     | (c) Consider use of a flow diagram                                                                                                                                                                           | N/A            |
| Descriptive data         | 14* | (a) Give characteristics of study participants (eg demographic, clinical, social) and information on exposures and potential confounders                                                                     | 8              |
|                          |     | (b) Indicate number of participants with missing data for each variable of interest                                                                                                                          | N/A            |
|                          |     | (c) <i>Cohort study</i> —Summarise follow-up time (eg, average and total amount)                                                                                                                             | N/A            |
| Outcome data             | 15* | <i>Cohort study</i> —Report numbers of outcome events or summary measures over time                                                                                                                          | 8-9            |
|                          |     | <i>Case-control study</i> —Report numbers in each exposure category, or summary measures of exposure                                                                                                         |                |
|                          |     | <i>Cross-sectional study</i> —Report numbers of outcome events or summary measures                                                                                                                           |                |
| Main results             | 16  | (a) Give unadjusted estimates and, if applicable, confounder-adjusted estimates and their precision (eg, 95% confidence interval). Make clear which confounders were adjusted for and why they were included | N/A            |
|                          |     | (b) Report category boundaries when continuous variables were categorized                                                                                                                                    | N/A            |
|                          |     | (c) If relevant, consider translating estimates of relative risk into absolute risk for a meaningful time period                                                                                             | N/A            |
| Other analyses           | 17  | Report other analyses done—eg analyses of subgroups and interactions, and sensitivity analyses                                                                                                               | N/A            |
| <b>Discussion</b>        |     |                                                                                                                                                                                                              |                |
| Key results              | 18  | Summarise key results with reference to study objectives                                                                                                                                                     | 9-10           |
| Limitations              | 19  | Discuss limitations of the study, taking into account sources of potential bias or imprecision. Discuss both direction and magnitude of any potential bias                                                   | 11             |
| Interpretation           | 20  | Give a cautious overall interpretation of results considering objectives, limitations, multiplicity of analyses, results from similar studies, and other relevant evidence                                   | 10-11          |
| Generalisability         | 21  | Discuss the generalisability (external validity) of the study results                                                                                                                                        | N/A            |
| <b>Other information</b> |     |                                                                                                                                                                                                              |                |
| Funding                  | 22  | Give the source of funding and the role of the funders for the present study and, if applicable, for the original study on which the present article is based                                                | 12             |

\*Give information separately for cases and controls in case-control studies and, if applicable, for exposed and unexposed groups in cohort and cross-sectional studies.

**Note:** An Explanation and Elaboration article discusses each checklist item and gives methodological background and published examples of transparent reporting. The STROBE checklist is best used in conjunction with this article (freely available on the Web sites of PLoS Medicine at <http://www.plosmedicine.org/>, Annals of Internal Medicine at <http://www.annals.org/>, and Epidemiology at <http://www.epidem.com/>). Information on the STROBE Initiative is available at [www.strobe-statement.org](http://www.strobe-statement.org).

# BMJ Open

## Multinational Comparison of New Antidepressant Use in Older Adults: A Cohort Study

|                                 |                                                                                                                                                                                                                                                                                                                                                                                                                                                                                                                                                                                                                                                                                                                                                                                                                                                                                                                                                                                                                                            |
|---------------------------------|--------------------------------------------------------------------------------------------------------------------------------------------------------------------------------------------------------------------------------------------------------------------------------------------------------------------------------------------------------------------------------------------------------------------------------------------------------------------------------------------------------------------------------------------------------------------------------------------------------------------------------------------------------------------------------------------------------------------------------------------------------------------------------------------------------------------------------------------------------------------------------------------------------------------------------------------------------------------------------------------------------------------------------------------|
| Journal:                        | <i>BMJ Open</i>                                                                                                                                                                                                                                                                                                                                                                                                                                                                                                                                                                                                                                                                                                                                                                                                                                                                                                                                                                                                                            |
| Manuscript ID                   | bmjopen-2018-027663.R1                                                                                                                                                                                                                                                                                                                                                                                                                                                                                                                                                                                                                                                                                                                                                                                                                                                                                                                                                                                                                     |
| Article Type:                   | Research                                                                                                                                                                                                                                                                                                                                                                                                                                                                                                                                                                                                                                                                                                                                                                                                                                                                                                                                                                                                                                   |
| Date Submitted by the Author:   | 13-Mar-2019                                                                                                                                                                                                                                                                                                                                                                                                                                                                                                                                                                                                                                                                                                                                                                                                                                                                                                                                                                                                                                |
| Complete List of Authors:       | Tamblyn, Robyn; McGill University, Department of Medicine and Department of Epidemiology and Biostatistics<br>Bates, David ; Brigham and Women's Hospital, Medicine<br>Buckeridge, David; McGill University, Epidemiology, Biostatistics, and Occupational Health; Agence de la Santé et des services Sociaux de Montréal, Direction de santé publique<br>Dixon, Will; University of Manchester, Arthritis Research UK Centre for Epidemiology<br>Forster, Alan; The Ottawa Hospital , Internal Medicine ; The Ottawa Hospital Research Institute, Clinical Epidemiology Program<br>Girard, Nadyne; McGill University, Clinical and Health Informatics Research Group<br>Haas, Jennifer; Brigham and Women's Hospital<br>Habib, Bettina; McGill University, Clinical and Health Informatics Research Group<br>Kurteva, Siyana; McGill University, Epidemiology, Biostatistics, and Occupational Health<br>Li, Jack; Taipei Medical University, Graduate Institute of Biomedical Informatics<br>Sheppard, Therese; University of Manchester |
| <b>Primary Subject Heading</b>: | Epidemiology                                                                                                                                                                                                                                                                                                                                                                                                                                                                                                                                                                                                                                                                                                                                                                                                                                                                                                                                                                                                                               |
| Secondary Subject Heading:      | Mental health                                                                                                                                                                                                                                                                                                                                                                                                                                                                                                                                                                                                                                                                                                                                                                                                                                                                                                                                                                                                                              |
| Keywords:                       | Antidepressants, Multinational comparison, Older adults, EPIDEMIOLOGY, pharmacosurveillance                                                                                                                                                                                                                                                                                                                                                                                                                                                                                                                                                                                                                                                                                                                                                                                                                                                                                                                                                |
|                                 |                                                                                                                                                                                                                                                                                                                                                                                                                                                                                                                                                                                                                                                                                                                                                                                                                                                                                                                                                                                                                                            |

SCHOLARONE™  
Manuscripts

## Multinational Comparison of New Antidepressant Use in Older Adults: A Cohort Study

Robyn Tamblyn<sup>1,2,3</sup>, David W. Bates<sup>4</sup>, David L. Buckeridge<sup>1,3</sup>, William G. Dixon<sup>5</sup>, Alan J. Forster<sup>6</sup>, Nadyne Girard<sup>3</sup>, Jennifer S. Haas<sup>4</sup>, Bettina Habib<sup>3</sup>, Siyana Kurteva<sup>1</sup>, Jack Li<sup>7,8</sup>, Therese Sheppard<sup>5</sup>

<sup>1</sup>Department of Epidemiology, Biostatistics and Occupational Health, McGill University, 1020 Pine Avenue West, Montreal, QC H3A 1A2, Canada

<sup>2</sup>Department of Medicine, McGill University Health Center, 1001 Decarie Boulevard, Montreal, QC H4A 3J1, Canada

<sup>3</sup>Clinical and Health Informatics Research Group, McGill University, 1140 Pine Avenue West, Montreal, QC H3A 1A3, Canada.

<sup>4</sup>Brigham and Women's Hospital, 75 Francis Street, Boston, MA 02115, USA.

<sup>5</sup>Arthritis Research UK Centre for Epidemiology, Centre for Musculoskeletal Research, Manchester Academic Health Science Centre, The University of Manchester, 2nd Floor, Stopford Building, Oxford Road, Manchester M13 9PT, UK.

<sup>6</sup>The Ottawa Hospital, 501 Smyth Road, Ottawa, Ontario K1H 8L6, Canada.

<sup>7</sup>International Center for Health Information Technology (ICHIT), Taipei Medical University, Taipei, Taiwan

<sup>8</sup>Graduate Institute of Biomedical Informatics, College of Medical Science and Technology, Taipei Medical University, Taipei, Taiwan

### Corresponding Author

Robyn Tamblyn, BScN, MSc, PhD, FCAHS, CM

McGill University

1140 Pine Avenue West

Montreal, QC H3A 1A3

Tel. 514-934-1934 ext 32999

[robyn.tamblyn@mcgill.ca](mailto:robyn.tamblyn@mcgill.ca)

Word count: 3,934

## ABSTRACT

**Objectives:** We used an international pharmacosurveillance network to estimate the rate and characteristics of antidepressant use in older adults in countries with more conservative (UK) and liberal depression guidelines (Canada, USA).

**Setting:** Electronic health records and population-based administrative data from six jurisdictions in four countries (UK, Taiwan, USA, and Canada).

**Participants:** A historical cohort of older adults ( $\geq 65$ ) who had a new episode of antidepressant use between 2009-2014.

**Outcome Measures:** The age and sex-standardized cumulative incidence of new episodes of antidepressant use in older adults was measured. Descriptive statistics were used to compare the proportion of new users by the antidepressant prescribed, therapeutic class, potential treatment indication, and country, as well as the characteristics of the first treatment episode (standardized daily doses, duration and changes).

**Results:** The incidence of antidepressant use between 2009-2014 varied from 0.7%(UK), to 18.6% (Taiwan). Tricyclic antidepressants (TCAs) were the most commonly used class in the UK (48.8%) and Taiwan (52.4%) compared to selective serotonin reuptake inhibitors (SSRIs) in North American jurisdictions (42.3%-53.3%). Chronic pain was the most common potential treatment indication (41.2%-68.2%). Among users with chronic pain, TCAs were used most frequently in the UK and Taiwan (55.2%-60.4%) whereas SSRIs were used most frequently in North America (33.5%-46.4%). Treatment was longer (252-525 vs 169-437 days), standardized doses were higher (0.7-1.3 vs 0.5-1.0), and treatment was more likely to be changed (31%-46% vs 21%-34%) among patients with depression (9.1%-43%) than those with chronic pain.

**Conclusion:** Antidepressant use in older adults varied 24-fold by country, being lowest in the UK, which has the most conservative treatment guidelines. Chronic pain was the most common potential treatment indication. Evaluation of real-world risks of TCAs is a priority for future research, given high rates of use, and the potential for increased toxicity in older adults because of potent anti-cholinergic effects.

## Article Summary

### Strengths and Limitations of this Study

- Uses an international pharmacosurveillance network to characterize antidepressant use across multiple jurisdictions
- Despite data harmonization efforts, measurement and reporting issues may lead to arbitrary differences between regions and countries.
- Treatment indication is unknown for all but one study cohort. Documentation of health problems in medical services billing data and EMRs was used as a proxy for treatment indication for remaining cohorts, which could have resulted in misclassification bias.
- While some cohorts represented total populations or representative samples, others were assembled from practices supported by specific information technology systems.

## **INTRODUCTION**

Depression affects an estimated 300 million people worldwide[1]. In the past decade, many countries have reported a two to three fold increase in the use of antidepressant medications[2]. The primary increase has been in newer antidepressants such as selective serotonin reuptake inhibitors (SSRIs), which are considered to have better efficacy than older drugs, with fewer side effects[3]. Increasing prevalence of use of antidepressants has also been associated with both an increase in the number of people started on therapy as well as its duration, with 40% of antidepressants being prescribed for more than 180 days [4]. Antidepressants now represent one of the most commonly prescribed medications[5 6], especially among older adults, where the increase in use has been the greatest in the US population[5 7].

The increasing use of antidepressants in older adults may be due to a number of factors. There has been long-standing advocacy for better recognition and treatment of depression in older adults[8 9]. In addition, individuals with multiple chronic conditions are more likely to experience depression. In Canada, 12% of persons 65 years and older have two or more major chronic conditions compared to only 3.6% in younger adults; and 4% of adults with at least one major chronic disease have mood or anxiety disorders, which are other approved indications for antidepressant use[10]. While increasing prevalence of depression, anxiety and other mood disorders in older adults may account for increasing use of antidepressants, there is also evidence that antidepressants are prescribed for unapproved indications that may not be supported by scientific evidence of efficacy[11-14]. One recent study found that nearly 50% of antidepressants were prescribed for unapproved indications including chronic pain, tiredness, and sleep disturbance[11], which are also more common in older adults[15].

Taken together, these factors have led to increasing concern about overuse of antidepressants, particularly in older adults[16]. This concern is heightened because of the reported association between antidepressant use and fall-related injuries, motor vehicle accidents, functional decline, and mortality in older adults[17-19]. Clinical practice guidelines for the management of depression vary considerably in their recommendations for first line treatment[20-24], although most acknowledge the need to consider patient preferences (Table 1). The United Kingdom NICE guidelines are the most conservative, recommending first line treatment with psychotherapy such as cognitive behavioral therapy with pharmacotherapy added only if non-pharmacological therapy is unsuccessful[24]. At the other end of the spectrum, the Canadian 2009 guidelines list pharmacotherapy as a first-line treatment for major depressive disorder, including selective serotonin re-uptake inhibitors (SSRIs), serotonin-norepinephrine reuptake inhibitors (SNRIs), mirtazapine, or bupropion[25-27]. Of note, Canada ranks as the 3<sup>rd</sup> highest user of anti-depressants among 23 OECD countries, surpassed only by Australia and Iceland[2].

However, few data are available regarding how national guidelines may contribute to differences in how antidepressants are used for older adults. We took advantage of an international pharmacosurveillance network[28] that uses electronic medical record (EMR) and population-based health administrative data to estimate the rate of antidepressant use in older adults in countries that had more conservative (UK) and lenient guidelines (Canada, USA, Taiwan). We evaluated differences in the choice of antidepressant, dose and duration of treatment, the prevalence of dose changes and switches in treatment of older adults

with new episodes of antidepressant use, as well as differences in treatment approach for patients with a recorded diagnosis of depression, other mental health co-morbidities, and chronic pain.

## **METHODS**

### **Study Design and Population**

To characterize antidepressant use in older adults, a cohort of individuals who were 65 years of age or older and had a new episode of antidepressant use between January 1, 2009 and December 31, 2014 following two years during which they had no prescription or dispensation of an antidepressant was assembled. Eligible patients were identified from electronic medical record (EMR) or population-based registries in a total of six jurisdictions in four countries (Canada, United States, UK, and Taiwan).

### **Data Sources**

#### *CANADA*

Quebec EMR cohort: Data were extracted from the Medical Office of the 21<sup>st</sup> Century (MOXXI) EMR, which includes a real-time linkage to the Quebec insurance agency, the Régie de l'assurance maladie du Québec (RAMQ) databases. This linkage provides historical and daily updates of patients' received medical services (diagnosis, procedure, date, location, provider), prescriptions dispensed from community pharmacies for persons who are publicly insured (prescriber, pharmacy, drug, dose, dispensing date, duration, refills), and mortality. Approximately 110 primary care physicians in Quebec use MOXXI for approximately 90,000 of their patients, representing approximately 25% of the patients in the practice, and approximately 5% of the Quebec population in primary care practices.

Quebec Administrative Data cohort: Data were retrieved from the Montreal Population Health Record, a population-based 25% random sample of the 4.1 million residents of Montreal, Canada's second largest city, which is dynamically updated each year to account for in and out-migration. Beneficiary characteristics were measured by linking the RAMQ beneficiary database (age, sex, postal code) with Statistics Canada's census file (postal code level measures of socio-economic status), and the Institute of Statistics birth and death registry (date of birth and death). From this population-based dataset, we identified all non-institutionalized persons 65 years of age or older between 2009-2014. All medical services (date, diagnosis, procedure), hospitalizations (admission and discharge date, primary and secondary diagnoses, in-hospital procedures), and medications (prescriber, pharmacy, drug, dose, dispensing date, duration, refills) received by members of the cohort were retrieved from the RAMQ database and those of the Quebec Ministry of Health.

Ontario Administrative Data Cohort: Data were extracted from the Institute for Clinical Evaluative Sciences population-based repository of health records for the 13.6 million Ontario residents. The data is provided by the Ontario Ministry of Health and Long-Term Care, which pays for all essential health services. For the 2,053,588 Ontario non-institutionalized residents who were 65 year or older between 2007 and 2014, we randomly sampled 20% and extracted age, sex and date of death from the beneficiary registrants database, all billing claims for medical services provided by Ontario physicians (date of service, diagnosis, procedure code, physician provider), all claims for medications dispensed in the community by Ontario



1  
2  
3 pharmacies (drug, date dispensed, prescriber, quantity, duration, number of refills), and data from  
4 discharge summaries of emergency department visits and hospital stays (date of admission and discharge,  
5 primary and secondary diagnoses and procedures).  
6

#### 8 *UNITED STATES*

9  
10 *Boston, Massachusetts EMR cohort:* Data were extracted from the Partners HealthCare Research Patient  
11 Data Registry (RPDR), which provides care for approximately 3 million of 5 million residents in Boston and  
12 surrounding areas. RPDR includes data from the Longitudinal Medical Record (LMR), an internally  
13 developed, web-based, fully functional EMR that was in use during this period for the participating  
14 primary care clinics from Brigham and Women's Hospital (BWH) and Massachusetts General Hospital  
15 (MGH), the two founding members of Partners Healthcare in Boston, Massachusetts. Data were retrieved  
16 from the structured clinical encounter information from RPDR for all outpatient primary care visits. To  
17 ensure complete follow-up, patients were eligible if they were seen in one of 37 BWH- or MGH- affiliated  
18 primary care or diabetes clinics.  
19  
20  
21

#### 22 *UNITED KINGDOM*

23  
24 *EMR cohort:* Data were extracted from the Clinical Practice Research Datalink (CPRD), an anonymised  
25 longitudinal medical records database for primary care. The primary care EHR includes information on all  
26 primary care interactions, including documented health problems, visit notes, prescriptions, and records  
27 of specialty referrals, as well as information on lab results, hospitalizations, and death. The CPRD includes  
28 more than 4 million active patients, 76% of whom are in England, representing 6.9% of the 64 million  
29 primary care population in the UK, and around 600 primary care practices[29]. Patients were included if  
30 their records met minimum quality standards and there were no gaps in registration. A 10% random  
31 sample of the 2,436,180 elderly patients in the database were extracted.  
32  
33  
34

#### 35 *TAIWAN*

36  
37 *Administrative Data Cohort:* Data were extracted from the Taiwanese National Health Insurance (NHI)  
38 system databases. The NHI provides health coverage to around 99% of Taiwan's population of 23 million,  
39 providing comprehensive coverage for all health services, including dental, preventive, Western medicine,  
40 and traditional Chinese medicine services. A random sample of 103,400 of the 3.6 million residents that  
41 were 65 years or older in Taiwan between 2007 and 2014 was extracted for this study. The NHI's research  
42 databases include a registry for beneficiaries (e.g. registrant's age, sex, residence), an outpatient visit  
43 database (date and time of visit, ICD-9-CM codes of existing health problems, service provided), an  
44 inpatient visit database (date of hospitalization and discharge, ICD-9-CM codes of existing health  
45 problems, procedure codes and dates), and a pharmacy database (drug prescribed, date, duration,  
46 dosage, prescribing physician, dispensing pharmacy).  
47  
48  
49  
50  
51  
52  
53  
54  
55  
56  
57  
58  
59  
60

## Measurement

### Patient Characteristics

*Age & Sex:* Date of birth and sex were retrieved from the administrative data in Canada and Taiwan as these data are verified at the time of enrollment in the health plan. For the US and United Kingdom, these data were retrieved from the EMR.

### Depression, Other Mental Health Comorbidities, and Chronic Pain

We measured the existence of potential indications for antidepressant use<sup>[11 12]</sup> including depression, other mental health conditions, and chronic pain. Depression included mild, moderate, major single or recurrent depressive disorder with or without psychotic symptoms, adjustment reaction, and mixed anxiety and depression. Other mental health conditions included anxiety, alcohol abuse, illicit drug use, attempted suicide, psychosis, schizophrenia, and bipolar disorder. Anxiety included dissociative and somatoform disorders. We used standard diagnostic codes (ICD 9, ICD 10, and Read codes) retrieved from the EMR, and/or medical services claims, and hospitalizations in the two-years prior to the first antidepressant prescription to measure these conditions (Appendix).

To measure chronic pain, we used a previously validated ICD9 and ICD10 code set for non-cancer pain<sup>[30]</sup>. The concepts and definitions used in the development and validation of this code set were used to map to Read codes (Appendix available upon request). Chronic non-cancer pain conditions included lumbar pain, back disorders that are often associated with pain (e.g. degenerative disc disease), neck and back problems (e.g. spondylosis), fibromyalgia, complex regional pain syndromes (e.g. mononeuritis), painful neuropathic disorders (e.g. post herpetic neuralgia), pain disorders with psychosocial dysfunction, and unclassified chronic pain problems.

### Characterizing Antidepressant Use

The characteristics of antidepressant use were compared in the population of seniors with a new episode of antidepressant use in each country, overall, and then within subgroups that had a diagnosis of a) depression, b) chronic pain, or c) other mental health problems.

*Classification of Starting Therapy:* The Anatomic Therapeutic Classification (ATC) system<sup>[31]</sup> was used to map national drug names and identification numbers to a common nomenclature based on the antidepressants that were prescribed during the study time period. Therapeutic classes included tri-cyclic antidepressants (TCAs), selective serotonin reuptake inhibitors (SSRIs), serotonin-norepinephrine reuptake inhibitors (SNRIs), serotonin antagonist and reuptake inhibitors (SARIs), norepinephrine-dopamine reuptake inhibitors (NDRIs), noradrenergic and specific serotonergic antidepressants (NaSSAs), tetracyclic antidepressants (TeCAs), melatonergic agonists (MAs), and norepinephrine reuptake inhibitors (NRIs). Monoamine oxidase inhibitors were excluded as they are rarely used and only for bipolar disorder. Starting therapy was classified by therapeutic class and drug, and by the number of antidepressants prescribed at treatment initiation.

1  
2  
3 *Starting Antidepressant Dose:* To enable comparisons in the dose prescribed among antidepressants, we  
4 created a standardized dose for each drug by dividing the prescribed dose by the WHO recommended  
5 daily dose for adults. The resulting indicator represents the proportion of the recommended daily adult  
6 dose that was prescribed. When more than one antidepressant was prescribed concurrently, we summed  
7 the standardized dose for each drug.  
8  
9

## 10 11 12 **Analysis**

13 The cumulative incidence of older adults with new episodes of antidepressant use in the period 2009 to  
14 2014 was measured by dividing the number of new users by the total population that was 65 years or  
15 older during this time period. Rates were standardized for age and sex using the direct method and the  
16 United Kingdom as the reference population. New episodes of use were defined as those who had no  
17 prior prescription of an antidepressant in the two years preceding their first prescription. Descriptive  
18 statistics were used to compare the proportion of new antidepressant users by the antidepressant  
19 prescribed, therapeutic class, country and potential treatment indication, as well as the characteristics of  
20 the first treatment episode. As the co-existence of other mental health conditions may modify treatment  
21 choices, we used the prevalence ratio to estimate the concurrence of other mental health problems,  
22 chronic pain and depression. The prevalence ratio allowed us to compare between countries even if the  
23 prevalence of these conditions is different[32] It was calculated as the prevalence of the health problem  
24 of interest among individuals with depression, divided by the prevalence of the health problem among  
25 individuals without depression.  
26  
27  
28  
29

## 30 31 **Patient and Public Involvement**

32 Patients and members of the public were not involved in the development of research questions or  
33 outcome measures, design, or implementation of this study. There are no plans to involve patients in  
34 dissemination of research results.  
35  
36

## 37 **RESULTS**

38 The age-standardized cumulative incidence of antidepressant use in persons aged 65 and older in the  
39 period 2009-2014 was highest in Taiwan (18.6%) and Ontario, Canada (15.3%), and lowest in Quebec-  
40 Montreal (4.7%) and England (6.6%) (Table 2). Similarly, the overall prevalence of antidepressant use in  
41 the same time period was lowest in England (10.3%), and highest in Ontario, Canada (26.8%) and Taiwan  
42 (23.4%). The distribution of age was similar in all jurisdictions.  
43  
44  
45  
46

### 47 *Frequency Distribution of the First Antidepressant Prescription by Therapeutic Class*

48 Overall, there were substantial differences between jurisdictions in the choice of starting therapy for new  
49 users (Table 3). Tricyclic antidepressants were the most commonly used class of antidepressants in  
50 England (48.8%) and Taiwan (52.4%) compared to selective serotonin reuptake inhibitors in North  
51 American jurisdictions (42.3%-53.3%). Notably, in the United Kingdom, approximately one-quarter of  
52 antidepressant prescriptions were for newer classes of antidepressants: serotonin antagonist & reuptake  
53 inhibitors (trazodone), norepinephrine-dopamine reuptake inhibitors (bupropion), and noradrenergic  
54 serotonin specific antidepressants (mirtazapine).  
55  
56  
57

### *Co-Existence of Depression, Other Mental Health Problems and Chronic Pain*

The prevalence of a depression diagnosis among new antidepressant users was relatively low, varying from 9.1% (Taiwan) to 21.7% (USA). The exception was the EMR cohort in Quebec where the prevalence was 43.0% (Table 4). Among new antidepressant users with a diagnosis of depression, there was a 30% (UK Prevalence Ratio: 1.3) to 7-fold (USA Prevalence Ratio: 7.3) increase in the likelihood of also having an alcohol or other substance abuse problem. Anxiety, which varied from being present in 12.1% of new antidepressant users in the UK to 47.8% of new users in Taiwan, was the most common mental health problem, and was also more likely to be present among persons with depression (Prevalence Ratio: 1.3 (Ontario, Quebec) to 3.6 (USA) ). Although less common in all jurisdictions, both major mental illness and suicide attempt were more likely to be present among antidepressant users with depression compared to those without depression. In contrast, chronic pain was the most prevalent problem among new antidepressant users (41.2% (UK) to 68.2% (Taiwan) ), and was as likely to be present among those with or without depression (Prevalence Ratio: 0.9-1.3) (Table 4). For almost one-third of new antidepressant users, there was no documented diagnosis of depression, other mental health problems or chronic pain.

### *Choice of Anti-depressant by Potential Treatment Indication*

Among new antidepressant users with a diagnosis of depression, selective serotonin reuptake inhibitors were selected as the starting therapy for 55.2% (Ontario) to 71.4% (UK), followed by SNRIs in Canadian jurisdictions, and newer antidepressants in Boston, the UK, and Taiwan (Table 5). For antidepressant users with a diagnosis of chronic pain, starting therapy was predominantly with SSRIs in North American jurisdictions (33.5%-46.1%), and with TCAs in the UK and Taiwan (55.2%-60.4%). Selection of therapy for other mental health problems was a mixture of choices made for persons with a diagnosis of depression and chronic pain.

### *Characteristics of the First Treatment Episode by Potential Treatment Indication*

Among patients with a diagnosis of depression who were started on antidepressants, 54% (Ontario) to 68% (Taiwan) remained on their initial course of antidepressant treatment (Table 6A). For this group, the mean duration of treatment varied from 104.7 (Taiwan) to 340.9 (Quebec) days, and the mean dose varied from 0.6 of the recommended adult dose (Taiwan), to the recommended adult dose in the United States site (mean dose: 1.0). Among the 32% (Taiwan) to 46% (Ontario) with a change in treatment, the most common change in all jurisdictions was an increase in dose occurring in 20% (Taiwan) to 33% (Ontario) of patients, followed by a decrease in dose (13% (Taiwan) to 21% (Ontario)), and the addition of a drug from a different therapeutic class (6% (UK) to 18% (Ontario)). Among patients with a change in therapy in their initial treatment episode, the mean duration of treatment was almost double (mean duration 312.6 to 616.9 days) than for patients with no change, and the mean dose during treatment was substantially higher (mean standardized proportion of the adult dose: 0.8 to 1.4).

The first treatment episode for new antidepressant users with a diagnosis of chronic pain was substantially different than patients with a diagnosis of depression (Table 6B). Overall, 66% (Ontario) to 79% (Taiwan) were kept on the initial treatment regimen, for a much shorter duration than for new users with a diagnosis of depression (mean duration: 83.6 days (Taiwan) to 300.9 days (Quebec)), and at lower mean

1  
2  
3 doses (mean standardized proportion of the adult dose: 0.4 (Taiwan, UK, Montreal) to 0.8 (U.S.)). For the  
4 21% to 34% of patients who had a change in treatment, the most common changes in all jurisdictions  
5 were an increase in dose (13% to 25%), a decrease in dose (9% to 14%) and the addition of another drug  
6 from a different therapeutic class (3% to 11%). For those with a change in treatment, the duration of the  
7 treatment episode was considerably longer in all jurisdictions (264.4 to 590.0 days), and the mean dose  
8 during the treatment episode was higher (0.5 to 1.1).  
9  
10

## 11 **INTERPRETATION**

12  
13  
14 This multi-national study is the first to compare the use of antidepressants among comparable cohorts of  
15 new users in different countries. We found wide variation in the incidence and prevalence of  
16 antidepressant use; the lowest rate was in the UK where guidelines for pharmacotherapy use for  
17 depression were the most conservative. Choice of starting therapy also varied widely by country and  
18 condition, with the UK and Taiwan more likely to use tricyclic antidepressants for persons with a diagnosis  
19 of chronic pain whereas selective serotonin reuptake inhibitors were the most common choice for both  
20 depression and pain in North American settings. Overall treatment duration was longer for patients with  
21 depression than chronic pain, mean treatment doses were higher, and there were more likely to be  
22 changes in therapy.  
23  
24  
25  
26  
27

28  
29 Differences in the incidence of antidepressant use in different countries as well as the choice of  
30 antidepressant therapy may also be influenced by a variety of system-related factors. For example, direct  
31 to consumer advertising of prescription drugs is permitted in the USA but banned in Canada, Europe, and  
32 the UK because these ads drive demand for specific treatments[33]. Also, drugs available and covered by  
33 public insurance plans in the UK, Taiwan and Canada are influenced by rigorous reviews and guidelines  
34 for the use of new drugs and technologies by national agencies such as the National Institute for Health  
35 and Care Excellence in the United Kingdom[34-36].  
36  
37  
38

39 A surprisingly large percentage of older adults were prescribed antidepressants for conditions other than  
40 depression. We found that chronic pain was the most common problem documented and it appeared to  
41 be the most likely reason for antidepressant use. Chronic pain has an estimated prevalence of 11.8%[37]  
42 to 43.5%[38] in adults, and increases with age, with an estimated 62% of those 75 years of age or older  
43 experiencing this problem[38]. While use of antidepressants for chronic pain has been shown to be  
44 effective, particularly tricyclic antidepressants (amitriptyline) and serotonin noradrenalin reuptake  
45 inhibitors (duloxetine) for neurogenic pain[39 40], tricyclic antidepressants have been on the lists of  
46 potentially contraindicated medications for the elderly for over a decade because of their potent anti-  
47 cholinergic effects that can lead to cognitive impairment, and other avoidable morbidity[41 42].  
48 Moreover, only one antidepressant, duloxetine has been approved for treatment of chronic pain in North  
49 America and Europe[11]. Although the anticholinergic effects of tricyclic antidepressants have been well  
50 documented[43-45], the actual “real-world” evidence of harm is limited[46], and should be addressed in  
51 future studies given the high rates of use.  
52  
53  
54  
55  
56  
57  
58  
59  
60

1  
2  
3 Notably, in this study of older adults, depression was documented in only two in ten users; the exception  
4 being in Quebec City/Montreal where four out of ten patients were prescribed antidepressants for  
5 depression. There are known problems in under-reporting, diagnosis and documentation of  
6 depression[47-49], which may account for some or all of these differences between sites. The MOXXI  
7 system used in the Quebec cohort likely provides an approximate estimate of the extent to which  
8 depression is undocumented. In this cohort, physicians are required to document the treatment indication  
9 for each drug prescribed[50], data that has been validated in prior studies[51]. Results from this setting  
10 suggest that twice as many patients receive antidepressants for depression, whereas a similar proportion  
11 of new antidepressant users had a diagnosis of chronic pain as in other sites.  
12  
13  
14  
15

16 Also, of interest, among patients with documented depression, antidepressant use in all countries  
17 followed current guidelines for depression management[21 24 52 53]. Choice of first-line therapy was  
18 predominantly selective serotonin reuptake inhibitors and serotonin-norepinephrine reuptake inhibitors.  
19 Starting doses were lower than the recommended adult doses, mean duration of treatment was 251-525  
20 days, and the main changes in treatment were increases in doses and the addition of an antidepressant  
21 from a different therapeutic class. Not surprisingly, among patients where there was a change in  
22 treatment, both the average antidepressant dose was higher and treatment duration was longer,  
23 suggesting a lack of treatment effectiveness. The cohort in Taiwan was different in a number of respects  
24 including lower antidepressant doses, shorter treatment duration, and fewer changes in therapy once  
25 started. The reason for these differences in approach is not clear. They may represent an innate  
26 conservatism in the use of antidepressants in the Taiwanese population where there is an acknowledged  
27 absence of evidence to support clinical guidelines[53], or known differences in genetic determinants of  
28 drug metabolism that have been established in population-based genomic studies of drug  
29 metabolism[54].  
30  
31  
32  
33  
34

35 This study has several limitations to consider in the interpretation of results. Efforts were made to  
36 harmonize data from different sources and countries, however both measurement and reporting issues  
37 may lead to arbitrary differences between regions and countries. With the exception of the Quebec  
38 cohort, treatment indication is unknown. Documentation of health problems in medical services billing  
39 data and EMRs was used as a proxy for treatment indication, which based on past studies has a predictive  
40 value of 7.8 – 80.3%[55]. The resulting misclassification will attenuate differences observed in treatment  
41 approach between conditions. Moreover, diagnoses of health problems tend to be under-reported in  
42 administrative data. Prescription data was used in the three jurisdictions and may overestimate the  
43 incidence and prevalence of anti-depressant use as approximately 37% of antidepressant prescriptions  
44 are not filled[56]. The Ontario, Montreal, and Taiwan cohorts represented total populations or  
45 representative samples, the UK, Quebec, and USA cohorts were assembled on the basis of practices  
46 supported by specific information technology systems. The trends observed in these more selected  
47 populations however are similar to those reported for antidepressant use in older adults in these  
48 countries[6 57-62].  
49  
50  
51  
52  
53

54 In conclusion, antidepressant use in older adults varies up to 24-fold by country (cumulative incidence  
55 from 0.7% to 17.0%), and chronic pain appears to be the most common treatment indication in all  
56  
57

1  
2  
3 jurisdictions, even more so than depression. Evaluation of real-world risks and benefits of antidepressants  
4 by treatment indication should be a priority for future research. The relative contraindication of tricyclic  
5 antidepressants in older adults because of their potent anticholinergic effects needs to be assessed given  
6 their high rate of use, and proven efficacy in pain management[39-42].  
7  
8

9  
10 **Funding:** This project was funded by the Canadian Institutes of Health Research (CIHR) operating grant #  
11 MOP-111166.  
12

13 **Ethical Approval:** This study received ethics approval from the McGill University Institutional Review  
14 Board (IRB # A01-B02-02A), the Institute for Clinical Evaluative Sciences, the Partners Human Research  
15 Committee IRB (Protocol # 2011P000773/PH), and the Independent Scientific Advisory Committee (ISAC)  
16 of CPRD (Protocol # 14\_081R).  
17  
18

19 **Transparency Declaration:** The lead author, Dr. Robyn Tamblyn, affirms that this manuscript is an honest,  
20 accurate, and transparent account of the study being reported; that no important aspects of the study  
21 have been omitted and that any discrepancies from the study as planned have been explained.  
22  
23

24 **Competing interests:** None to disclose  
25  
26

27 **Data sharing:** No additional data available  
28

29 **Contributors:** RT, DWB, DLB, WGD, AJF, JSH, and JL contributed to the study concept and design. NG, TS,  
30 and BH contributed to the statistical analysis. RT drafted the manuscript. DWB, DLB, WGD, AJF, NG, JSH,  
31 BH, SK, JL, and TS critically reviewed the manuscript for intellectual content. All authors read and approved  
32 the final manuscript.  
33  
34  
35  
36  
37  
38  
39  
40  
41  
42  
43  
44  
45  
46  
47  
48  
49  
50  
51  
52  
53  
54  
55  
56  
57  
58  
59  
60

## Reference List

1. WHO. Depression. In: Organization WH, ed., 2017.
2. OECD. Health at a Glance 2015: OECD indicators. OECD Indicators, OECD Publishing, Paris. DOI: [https://doi.org/10.1787/health\\_glance-2015-en](https://doi.org/10.1787/health_glance-2015-en). Accessed February, 2015:217.
3. Chee KY, Tripathi A, Avasthi A, et al. International study on antidepressant prescription pattern at 40 major psychiatric institutions and hospitals in Asia: A 10-year comparison study. *Asia Pac Psychiatry* 2015;**7**(4):366-74 doi: 10.1111/appy.12176[published Online First: Epub Date]].
4. Burton C, Anderson N, Wilde K, Simpson CR. Factors associated with duration of new antidepressant treatment: analysis of a large primary care database. *Br J Gen Pract* 2012;**62**(595):e104-12 doi: 10.3399/bjgp12X625166[published Online First: Epub Date]].
5. Rotermann M, Sanmartin C, Hennessy D, Arthur M. Prescription medication use by Canadians aged 6 to 79. *Health Rep* 2014;**25**(6):3-9
6. Pratt LA, Brody DJ, Gu Q. Antidepressant use in persons aged 12 and over: United States, 2005-2008. *NCHS Data Brief* 2011(76):1-8
7. Zhong W, Kremers HM, Yawn BP, et al. Time trends of antidepressant drug prescriptions in men versus women in a geographically defined US population. *Arch Womens Ment Health* 2014;**17**(6):485-92 doi: 10.1007/s00737-014-0450-7[published Online First: Epub Date]].
8. Ivanova JI, Bienfait-Beuzon C, Birnbaum HG, Connolly C, Emani S, Sheehy M. Physicians' decisions to prescribe antidepressant therapy in older patients with depression in a US managed care plan. *Drugs Aging* 2011;**28**(1):51-62 doi: 10.2165/11539900-000000000-00000[published Online First: Epub Date]].
9. Singh R, Mazi-Kotwal N, Thalitaya MD. Recognising and Treating Depression in the Elderly. *Psychiatr Danub* 2015;**27** **Suppl 1**:S231-4
10. PHSA. Chronic disease multi-morbidity. How healthy are Canadians? A Trend analysis of the health of Canadians from a healthy living and chronic disease perspective.: Public Health Agency of Canada, 2014:23-24.
11. Wong J, Motulsky A, Abrahamowicz M, Egale T, Buckeridge DL, Tamblyn R. Off-label indications for antidepressants in primary care: descriptive study of prescriptions from an indication based electronic prescribing system. *BMJ* 2017;**356**:j603 doi: 10.1136/bmj.j603[published Online First: Epub Date]].
12. Wong J, Motulsky A, Egale T, Buckeridge DL, Abrahamowicz M, Tamblyn R. Treatment indications for antidepressants prescribed in primary care in quebec, canada, 2006-2015. *JAMA* 2016;**315**(20):2230-32 doi: 10.1001/jama.2016.3445[published Online First: Epub Date]].
13. Egale T, Buckeridge DL, Winslade NE, Benedetti A, Hanley JA, Tamblyn R. Drug, patient, and physician characteristics associated with off-label prescribing in primary care. *Archives of internal medicine* 2012;**172**(10):781-8 doi: 10.1001/archinternmed.2012.340[published Online First: Epub Date]].
14. Chen H, Reeves JH, Fincham JE, Kennedy WK, Dorfman JH, Martin BC. Off-label use of antidepressant, anticonvulsant, and antipsychotic medications among Georgia medicaid enrollees in 2001. *The Journal of clinical psychiatry* 2006;**67**(6):972-82
15. Mojtabai R, Olfson M. Proportion of antidepressants prescribed without a psychiatric diagnosis is growing. *Health Aff (Millwood)* 2011;**30**(8):1434-42 doi: 10.1377/hlthaff.2010.1024[published Online First: Epub Date]].
16. Mojtabai R. Diagnosing depression in older adults in primary care. *N Engl J Med* 2014;**370**(13):1180-2 doi: 10.1056/NEJMp1311047[published Online First: Epub Date]].
17. Wang CY, Fu SH, Wang CL, Chen PJ, Wu FL, Hsiao FY. Serotonergic antidepressant use and the risk of fracture: a population-based nested case-control study. *Osteoporos Int* 2016;**27**(1):57-63 doi: 10.1007/s00198-015-3213-z[published Online First: Epub Date]].
18. Moura C, Bernatsky S, Abrahamowicz M, et al. Antidepressant use and 10-year incident fracture risk: the population-based Canadian Multicentre Osteoporosis Study (CaMoS). *Osteoporos Int* 2014;**25**(5):1473-81 doi: 10.1007/s00198-014-2649-x[published Online First: Epub Date]].



19. Orriols L, Wilchesky M, Lagarde E, Suissa S. Prescription of antidepressants and the risk of road traffic crash in the elderly: a case-crossover study. *Br J Clin Pharmacol* 2013;**76**(5):810-5 doi: 10.1111/bcp.12090[published Online First: Epub Date]].
20. McIntyre RS, Suppes T, Tandon R, Ostacher M. Florida Best Practice Psychotherapeutic Medication Guidelines for Adults With Major Depressive Disorder. *The Journal of clinical psychiatry* 2017;**78**(6):703-13 doi: 10.4088/JCP.16cs10885[published Online First: Epub Date]].
21. Kennedy SH, Lam RW, McIntyre RS, et al. Canadian Network for Mood and Anxiety Treatments (CANMAT) 2016 Clinical Guidelines for the Management of Adults with Major Depressive Disorder: Section 3. Pharmacological Treatments. *Can J Psychiatry* 2016;**61**(9):540-60 doi: 10.1177/0706743716659417[published Online First: Epub Date]].
22. APA. The American Psychiatric Association Practice Guidelines for the Psychiatric Evaluation of Adults. Third ed: American Psychiatric Association, 2016:170.
23. Mulsant BH, Blumberger DM, Ismail Z, Rabheru K, Rapoport MJ. A systematic approach to pharmacotherapy for geriatric major depression. *Clin Geriatr Med* 2014;**30**(3):517-34 doi: 10.1016/j.cger.2014.05.002[published Online First: Epub Date]].
24. NICE. Depression in adults: recognition and management. UK: National Institute for Health and Care Excellence, 2009.
25. Kennedy SH, Lam RW, Parikh SV, Patten SB, Ravindran AV. Canadian Network for Mood and Anxiety Treatments (CANMAT) clinical guidelines for the management of major depressive disorder in adults. Introduction. *Journal of affective disorders* 2009;**117** Suppl 1:S1-2 doi: 10.1016/j.jad.2009.06.043[published Online First: Epub Date]].
26. Parikh SV, Segal ZV, Grigoriadis S, et al. Canadian Network for Mood and Anxiety Treatments (CANMAT) clinical guidelines for the management of major depressive disorder in adults. II. Psychotherapy alone or in combination with antidepressant medication. *Journal of affective disorders* 2009;**117** Suppl 1:S15-25 doi: 10.1016/j.jad.2009.06.042[published Online First: Epub Date]].
27. Lam RW, Kennedy SH, Grigoriadis S, et al. Canadian Network for Mood and Anxiety Treatments (CANMAT) clinical guidelines for the management of major depressive disorder in adults. III. Pharmacotherapy. *Journal of affective disorders* 2009;**117** Suppl 1:S26-43 doi: 10.1016/j.jad.2009.06.041[published Online First: Epub Date]].
28. Tamblyn R, Girard N, Dixon WG, et al. Pharmacosurveillance without borders: electronic health records in different countries can be used to address important methodological issues in estimating the risk of adverse events. *Journal of clinical epidemiology* 2016;**77**:101-11 doi: 10.1016/j.jclinepi.2016.03.033[published Online First: Epub Date]].
29. Herrett E, Gallagher AM, Bhaskaran K, et al. Data Resource Profile: Clinical Practice Research Datalink (CPRD). *International Journal of Epidemiology* 2015;**44**(3):827-36 doi: 10.1093/ije/dyv098[published Online First: Epub Date]].
30. Lacasse A, Ware MA, Dorais M, Lanctot H, Choiniere M. Is the Quebec provincial administrative database a valid source for research on chronic non-cancer pain? *Pharmacoepidemiology and drug safety* 2015;**24**(9):980-90 doi: 10.1002/pds.3820[published Online First: Epub Date]].
31. ATC: Structure and Principles. Secondary ATC: Structure and Principles 2018-02-05. [https://www.whocc.no/atc/structure\\_and\\_principles/](https://www.whocc.no/atc/structure_and_principles/).
32. Thompson ML, Myers JE, Kriebel D. Prevalence odds ratio or prevalence ratio in the analysis of cross sectional data: what is to be done? *Occupational and environmental medicine* 1998;**55**(4):272-7
33. Magrini N, Font M. Direct to consumer advertising of drugs in Europe. *BMJ* 2007;**335**(7619):526-26 doi: 10.1136/bmj.39310.506308.AD[published Online First: Epub Date]].
34. The development and updating of local formularies, NICE good practice guidance: National Institute for Health and Clinical Excellence (NICE), 2012.
35. Technology appraisal guidance. Secondary Technology appraisal guidance. <https://www.nice.org.uk/about/what-we-do/our-programmes/nice-guidance/nice-technology-appraisal-guidance>.
36. CADTH Common Drug Review (CDR). Secondary CADTH Common Drug Review (CDR). <https://www.cadth.ca/about-cadth/what-we-do/products-services/cdr>.
37. Mansfield KE, Sim J, Jordan JL, Jordan KP. A systematic review and meta-analysis of the prevalence of chronic widespread pain in the general population. *Pain* 2016;**157**(1):55-64 doi: 10.1097/j.pain.0000000000000314[published Online First: Epub Date]].

- 1
- 2 38. Fayaz A, Croft P, Langford RM, Donaldson LJ, Jones GT. Prevalence of chronic pain in the UK: a systematic review and  
3 meta-analysis of population studies. *BMJ Open* 2016;**6**(6) doi: 10.1136/bmjopen-2015-010364[published Online  
4 First: Epub Date]].
- 5 39. Fennema J, Petrykiv S, de Jonge L, Arts M. Efficacy and safety of antidepressants as analgesics in chronic pain: A  
6 review. *European Psychiatry* 2017;**41**:S234 doi: <https://doi.org/10.1016/j.eurpsy.2017.01.2248>[published  
7 Online  
8 First: Epub Date]].
- 9 40. Finnerup NB, Attal N, Haroutounian S, et al. Pharmacotherapy for neuropathic pain in adults: a systematic review and  
10 meta-analysis. *The Lancet Neurology* 2015;**14**(2):162-73 doi: 10.1016/S1474-4422(14)70251-0[published Online  
11 First: Epub Date]].
- 12 41. O'Mahony D, O'Sullivan D, Byrne S, O'Connor MN, Ryan C, Gallagher P. STOPP/START criteria for potentially  
13 inappropriate prescribing in older people: version 2. *Age and ageing* 2015;**44**(2):213-8 doi:  
14 10.1093/ageing/afu145[published Online First: Epub Date]].
- 15 42. American Geriatrics Society 2015 Updated Beers Criteria for Potentially Inappropriate Medication Use in Older Adults.  
16 *J Am Geriatr Soc* 2015;**63**(11):2227-46 doi: 10.1111/jgs.13702[published Online First: Epub Date]].
- 17 43. Chew ML, Mulsant BH, Pollock BG, et al. Anticholinergic activity of 107 medications commonly used by older adults. *J*  
18 *Am Geriatr Soc* 2008;**56**(7):1333-41 doi: 10.1111/j.1532-5415.2008.01737.x[published Online First: Epub Date]].
- 19 44. Pollock BG, Mulsant BH, Nebes R, et al. Serum anticholinergic activity in elderly depressed patients treated with paroxetine  
20 or nortriptyline. *The American journal of psychiatry* 1998;**155**(8):1110-2 doi: 10.1176/ajp.155.8.1110[published  
21 Online First: Epub Date]].
- 22 45. Duran CE, Azermai M, Vander Stichele RH. Systematic review of anticholinergic risk scales in older adults. *European*  
23 *journal of clinical pharmacology* 2013;**69**(7):1485-96 doi: 10.1007/s00228-013-1499-3[published Online First: Epub  
24 Date]].
- 25 46. Collamati A, Martone AM, Poscia A, et al. Anticholinergic drugs and negative outcomes in the older population: from  
26 biological plausibility to clinical evidence. *Aging clinical and experimental research* 2016;**28**(1):25-35 doi:  
27 10.1007/s40520-015-0359-7[published Online First: Epub Date]].
- 28 47. Bharadwaj P, Pai MM, Suziedelyte A. Mental health stigma. *Economics Letters* 2017;**159**:57-60 doi:  
29 <https://doi.org/10.1016/j.econlet.2017.06.028>[published  
30 Online First: Epub Date]].
- 31 48. Hunt M, Auriemma J, Cashaw ACA. Self-Report Bias and Underreporting of Depression on the BDI-II. *Journal of*  
32 *Personality Assessment* 2003;**80**(1):26-30 doi: 10.1207/S15327752JPA8001\_10[published Online First: Epub  
33 Date]].
- 34 49. Cepoiu M, McCusker J, Cole MG, Sewitch M, Belzile E, Ciampi A. Recognition of Depression by Non-psychiatric  
35 Physicians—A Systematic Literature Review and Meta-analysis. *Journal of General Internal Medicine*  
36 2008;**23**(1):25-36 doi: 10.1007/s11606-007-0428-5[published Online First: Epub Date]].
- 37 50. Tamblyn R, Huang A, Kawasumi Y, et al. The Development and Evaluation of an Integrated Electronic Prescribing and  
38 Drug Management System for Primary Care. *Journal of the American Medical Informatics Association*  
39 2006;**13**(2):148-59 doi: 10.1197/jamia.M1887[published Online First: Epub Date]].
- 40 51. Eguale T, Winslade N, Hanley JA, Buckeridge DL, Tamblyn R. Enhancing Pharmacosurveillance with Systematic  
41 Collection of Treatment Indication in Electronic Prescribing. *Drug Safety* 2010;**33**(7):559-67 doi:  
42 10.2165/11534580-000000000-00000[published Online First: Epub Date]].
- 43 52. Gelenberg AJF, M. P.; Markowitz, J. C.; Rosenbaum, J. F.; Thase, M. E.; Trivedi, M. H.; Van Rhoads, R. S. Practice  
44 Guideline for the Treatment of Patients with Major Depressive Disorder: American Psychiatric Association, 2010.
- 45 53. Treuer T, Liu CY, Salazar G, et al. Use of antidepressants in the treatment of depression in Asia: guidelines, clinical  
46 evidence, and experience revisited. *Asia Pac Psychiatry* 2013;**5**(4):219-30 doi: 10.1111/appy.12090[published  
47 Online First: Epub Date]].
- 48 54. Kirchheiner J, Nickchen K, Bauer M, et al. Pharmacogenetics of antidepressants and antipsychotics: the contribution of  
49 allelic variations to the phenotype of drug response. *Molecular Psychiatry* 2004;**9**:442 doi:  
50 10.1038/sj.mp.4001494[published Online First: Epub Date]].
- 51 55. Jenna W, Michal A, L. BD, Robyn T. Assessing the accuracy of using diagnostic codes from administrative data to infer  
52 antidepressant treatment indications: a validation study. *Pharmacoepidemiology and drug safety*; **0**(0) doi:  
53 doi:10.1002/pds.4436[published Online First: Epub Date]].
- 54
- 55
- 56
- 57
- 58
- 59
- 60

- 1  
2 56. Tamblyn R, Egualé T, Huang A, Winslade N, Doran P. The Incidence and Determinants of Primary Nonadherence With  
3 Prescribed Medication in Primary Care: A Cohort Study Primary Nonadherence With Prescribed Medication in  
4 Primary Care. *Annals of Internal Medicine* 2014;**160**(7):441-50 doi: 10.7326/M13-1705 %J *Annals of Internal*  
5 *Medicine*[published Online First: Epub Date]].
- 6 57. Gobert M, D'hoore W. Prevalence of psychotropic drug use in nursing homes for the aged in Quebec and in the  
7 French-speaking area of Switzerland. *International Journal of Geriatric Psychiatry* 2005;**20**(8):712-21 doi:  
8 doi:10.1002/gps.1349[published Online First: Epub Date]].
- 9 58. Beck CA, Williams JV, Wang JL, et al. Psychotropic Medication Use in Canada. *The Canadian Journal of Psychiatry*  
10 2005;**50**(10):605-13 doi: 10.1177/070674370505001006[published Online First: Epub Date]].
- 11 59. Beck CA, Patten SB, Williams JVA, et al. Antidepressant utilization in Canada. *Social Psychiatry and Psychiatric*  
12 *Epidemiology* 2005;**40**(10):799 doi: 10.1007/s00127-005-0968-0[published Online First: Epub Date]].
- 13 60. Lewer D, O'Reilly C, Mojtabai R, Evans-Lacko S. Antidepressant use in 27 European countries: Associations with  
14 sociodemographic, cultural and economic factors. *British Journal of Psychiatry* 2018;**207**(3):221-26 doi:  
15 10.1192/bjp.bp.114.156786[published Online First: Epub Date]].
- 16 61. Petty DR, House A, Knapp P, Raynor T, Zermansky A. Prevalence, duration and indications for prescribing of  
17 antidepressants in primary care. *Age and ageing* 2006;**35**(5):523-26 doi: 10.1093/ageing/af023[published Online  
18 First: Epub Date]].
- 19 62. Mark TL, Joish VN, Hay JW, Sheehan DV, Johnston SS, Cao Z. Antidepressant Use in Geriatric Populations: The Burden  
20 of Side Effects and Interactions and Their Impact on Adherence and Costs. *The American Journal of Geriatric*  
21 *Psychiatry* 2011;**19**(3):211-21 doi: <https://doi.org/10.1097/JGP.0b013e3181f1803d>[published  
22 Online First: Epub  
23 Date]].
- 24  
25  
26  
27  
28  
29  
30  
31  
32  
33  
34  
35  
36  
37  
38  
39  
40  
41  
42  
43  
44  
45  
46  
47  
48  
49  
50  
51  
52  
53  
54  
55  
56  
57  
58  
59  
60

Table 1. Summary of Depression Guidelines

|                                                                                                                               | US – APA guidelines (2010)                                                                                                                                                                                                                                                                                                                                                                                                                                                                                                                                                                                                                                                                                                                                                                                                                                        | UK – NICE guidelines (2009)                                                                                                                                                                                                                                                                                                                                                                                                                                                                                                                                                                                                                                                                                                                                                                                                                                                                                                                      | Canada – CANMAT (2009)                                                                                                                                                                                                                                                                                                                                                                                                                                                                                                                         | Taiwan - Taiwan Association Against Depression (2012)                                   |
|-------------------------------------------------------------------------------------------------------------------------------|-------------------------------------------------------------------------------------------------------------------------------------------------------------------------------------------------------------------------------------------------------------------------------------------------------------------------------------------------------------------------------------------------------------------------------------------------------------------------------------------------------------------------------------------------------------------------------------------------------------------------------------------------------------------------------------------------------------------------------------------------------------------------------------------------------------------------------------------------------------------|--------------------------------------------------------------------------------------------------------------------------------------------------------------------------------------------------------------------------------------------------------------------------------------------------------------------------------------------------------------------------------------------------------------------------------------------------------------------------------------------------------------------------------------------------------------------------------------------------------------------------------------------------------------------------------------------------------------------------------------------------------------------------------------------------------------------------------------------------------------------------------------------------------------------------------------------------|------------------------------------------------------------------------------------------------------------------------------------------------------------------------------------------------------------------------------------------------------------------------------------------------------------------------------------------------------------------------------------------------------------------------------------------------------------------------------------------------------------------------------------------------|-----------------------------------------------------------------------------------------|
| 1<br>2<br>3<br>4<br>5<br>6<br>7<br>8<br>9<br>10<br>11<br>12<br>13<br>14<br>15<br>16<br>17<br>18<br>19<br>20<br>21<br>22<br>23 | <p><b>First line treatment</b></p> <p>Antidepressant medications for patients with <b>mild, moderate, or severe MDD</b>, especially patients with a history of prior positive response, moderate to severe symptoms, significant sleep or appetite disturbances, agitation, patient preference, etc.</p> <p><u>Psychotherapy</u> for patients with <b>mild/moderate MDD</b>, especially in the presence of significant psychosocial stressors, intrapsychic conflict, interpersonal difficulties, a co-occurring Axis II disorder, treatment availability, or patient preference.</p> <p>The <u>combination of psychotherapy and antidepressant medication</u> for patients with <b>moderate to severe MDD</b>, as well as in milder cases for patients with psychosocial or interpersonal problems, intrapsychic conflict, or co-occurring Axis II disorder.</p> | <p>For patients with <b>persistent subthreshold depressive symptoms or mild to moderate depression</b>, first-line treatment is <u>low-intensity psychosocial interventions</u>. Antidepressants should only be considered for patients with a past history of moderate or severe depression, initial presentation of symptoms that have been present for a long period (at least 2 years), or subthreshold depressive symptoms or mild depression that persists after other interventions.</p> <p>For patients with <b>persistent subthreshold depressive symptoms or mild to moderate depression with inadequate response to initial interventions</b>, an <u>antidepressant or a high-intensity psychological intervention</u> should be considered.</p> <p>For patients with <b>moderate or severe depression</b>, a <u>combination of antidepressant medication and a high-intensity psychological intervention</u> should be provided.</p> | <p>Second-generation antidepressants are first line treatments for patients with a <b>major depressive episode of moderate or greater severity</b>.</p> <p>First line treatments for individuals with <b>depression of mild severity</b> include <u>cognitive behavioral therapy (CBT) and interpersonal therapy (IPT)</u>.</p> <p><u>Psychotherapy</u> should be considered for <b>patients with treatment-resistant depression</b>.</p>                                                                                                      | <p><u>Pharmacotherapy (preferred) or psychotherapy</u></p>                              |
| 24<br>25<br>26<br>27<br>28<br>29<br>30<br>31<br>32<br>33<br>34<br>35<br>36<br>37<br>38                                        | <p><b>Pharmacotherapy first-line treatment</b></p> <p>Antidepressant selection should be based on the tolerability, safety, and cost of the medication, as well as patient preference and history of prior medication treatment.</p> <p><b>SSRIs, SNRIs, mirtazapine, and bupropion</b> are optimal for most patients.</p> <p>MAOIs are limited to patients who do not respond to other treatments.</p>                                                                                                                                                                                                                                                                                                                                                                                                                                                           | <p>Prescribed antidepressant should normally be an <b>SSRI in a generic form</b>.</p> <p>When prescribing drugs other than SSRIs, the following should be considered:</p> <ul style="list-style-type: none"> <li>• The increased likelihood of the person stopping treatment because of side effects (and the consequent need to increase the dose gradually) with venlafaxine, duloxetine and TCAs.</li> <li>• The specific cautions, contraindications, and monitoring requirements for some drugs</li> <li>• Non-reversible MAOIs, such as phenelzine, should normally be prescribed only by specialist mental health professionals.</li> <li>• Dosulepin should not be prescribed</li> </ul>                                                                                                                                                                                                                                                 | <p>Choice of antidepressant should be based on patient factors (clinical features, patient preference, etc.) and medication factors (drug-drug interactions, cost, availability, efficacy and tolerability, etc.)</p> <p>First-line treatments include <b>SSRIs, SNRIs, agomelatine, bupropion, mirtazapine, mianserin and vortioxetine</b>.</p> <p>Second-line treatments include TCAs, quetiapine and trazodone, moclobemide and selegiline, levomilnacipran, and vilazodone.</p> <p>Third-line treatments include MAOIs and reboxetine.</p> | <p><b>SSRIs, SNRIs, or any one of the newer antidepressive agents except MAOIs.</b></p> |

Table 2 Comparisons in the Cumulative Incidence and Prevalence of Episodes of Antidepressant Use in Adults 65 Years of Age or Older Between Regions and Countries

| Elderly Population                                    | Canada                                         |                                                 |                                              | United States                     | United Kingdom                           | Taiwan                               |
|-------------------------------------------------------|------------------------------------------------|-------------------------------------------------|----------------------------------------------|-----------------------------------|------------------------------------------|--------------------------------------|
|                                                       | Ontario Sample<br>(Admin. Data) <sup>1,3</sup> | Montreal Sample<br>(Admin. Data) <sup>1,3</sup> | Quebec City & Mtl<br>(EMR Data) <sup>2</sup> | Boston<br>(EMR Data) <sup>2</sup> | CPRD Sample<br>(EMR Data) <sup>2,3</sup> | NHIRDB<br>(Admin. Data) <sup>1</sup> |
| <b>Total Population Elderly</b>                       | <b>405,141</b>                                 | <b>120,777</b>                                  | <b>28,273</b>                                | <b>83,394</b>                     | <b>241,339</b>                           | <b>103,400</b>                       |
| <b>All Users of Antidepressants<sup>5</sup></b>       |                                                |                                                 |                                              |                                   |                                          |                                      |
| Number of Users                                       | 108,577                                        | 23,422                                          | 4,450                                        | 17,359                            | 24,858                                   | 24,239                               |
| Prevalence in Elderly (%)                             | 26.8%                                          | 19.4%                                           | 15.7%                                        | 20.8%                             | 10.3%                                    | 23.4%                                |
| <b>New Episodes of Antidepressant Use<sup>4</sup></b> |                                                |                                                 |                                              |                                   |                                          |                                      |
| Number of New Users                                   | 60,366                                         | 13,303                                          | 1,308                                        | 10,131                            | 15,868                                   | 17,580                               |
| Incidence in Elderly (%)                              | 14.9%                                          | 11.0%                                           | 4.6%                                         | 12.2%                             | 6.6%                                     | 17.0%                                |
| Age Standardized Incidence (%)                        | 15.3%                                          | 12.1%                                           | 4.7%                                         | 12.3%                             | 6.6% (reference)                         | 18.6%                                |
| Sex Standardized Incidence (%)                        | 14.9%                                          | 11.0%                                           | 4.6%                                         | 12.1%                             | 6.6% (reference)                         | 17.0%                                |
| <b>Demographics</b>                                   |                                                |                                                 |                                              |                                   |                                          |                                      |
| Between 65 – 74 years old                             | 32,115 (53.2%)                                 | 5,713 (42.9%)                                   | 699 (53.4%)                                  | 5,826 (57.5%)                     | 7,129 (44.9%)                            | 8,811 (50.1%)                        |
| 75 years or older                                     | 28,251 (46.8%)                                 | 7,590 (57.1%)                                   | 609 (46.6%)                                  | 4,305 (42.5%)                     | 8,739 (55.1%)                            | 8,769 (49.9%)                        |
| % Female                                              | 36,884 (61.1%)                                 | 8,986 (67.5%)                                   | 853 (65.2%)                                  | 6,136 (60.6%)                     | 10,045 (63.3%)                           | 9,539 (54.3%)                        |

<sup>1</sup>Administrative data is retrieved from population-based health insurance claims for medical visits, and prescriptions.

<sup>2</sup>EMR data are extracted from primary care clinic electronic health records in the USA (Partners Inc.), Quebec (MOXXI), and the United Kingdom (Clinical Practice Research Database)

<sup>3</sup>Ontario represents a 20% random sample of elderly, Montreal represents a 25% annual random sample of Montreal residents, and the United Kingdom is a 10% random sample of elderly in the CPRD

<sup>4</sup>New Episodes of Use of Antidepressants were defined as no prescription or dispensing of an antidepressant in the two years prior to the first antidepressant in the period 2009-2014

<sup>5</sup>All users include persons with an active prescription or dispensed supply of antidepressants between 2007-2008 as well as all new users between the period 2009-2014

Table 3 Frequency Distribution of the First Antidepressant Prescribed for New Antidepressant Users by Therapeutic Class by Country and Jurisdiction

| Antidepressant                                          | Canada                             |                                    |                                  | United States                      | United Kingdom                     | Taiwan                             |
|---------------------------------------------------------|------------------------------------|------------------------------------|----------------------------------|------------------------------------|------------------------------------|------------------------------------|
|                                                         | Ontario Sample                     | Montreal Sample                    | Quebec City & Mtl                | Boston                             | CPRD                               | NHIRDB                             |
|                                                         | (N=60,366 patients<br>N=61,696 Rx) | (N=13,303 patients<br>N=14,217 Rx) | (N=1,308 patients<br>N=1,324 Rx) | (N=10,131 patients<br>N=10,586 Rx) | (N=15,868 patients<br>N=15,970 Rx) | (N=17,580 patients<br>N=17,790 Rx) |
|                                                         | N Rx (%)                           | N Rx (%)                           | N Rx (%)                         | N Rx (%)                           | N Rx (%)                           | N Rx (%)                           |
| <b>Selective Serotonin Reuptake Inhibitors</b>          |                                    |                                    |                                  |                                    |                                    |                                    |
| Citalopram                                              | 8,760 (14.2%)                      | 4,708 (33.1%)                      | 410 (30.9%)                      | 2,117 (19.9%)                      | 4,232 (26.4%)                      | 335 (1.8%)                         |
| Escitalopram                                            | 9,000 (14.6%)                      | 1 (0.0%)                           | 73 (5.5%)                        | 438 (4.1%)                         | 145 (0.9%)                         | 825 (4.6%)                         |
| Fluoxetine                                              | 697 (1.1%)                         | 114 (0.8%)                         | 8 (0.6%)                         | 1,156 (10.9%)                      | 876 (5.4%)                         | 773 (4.3%)                         |
| Fluvoxamine                                             | 172 (0.3%)                         | 44 (0.3%)                          | 6 (0.4%)                         | 29 (0.2%)                          | 1 (0.0%)                           | 101 (0.5%)                         |
| Paroxetine                                              | 1,924 (3.1%)                       | 515 (3.6%)                         | 23 (1.7%)                        | 432 (4.0%)                         | 92 (0.5%)                          | 435 (2.4%)                         |
| Sertraline                                              | 2,561 (4.2%)                       | 640 (4.5%)                         | 132 (20.2%)                      | 1,481 (13.9%)                      | 990 (6.1%)                         | 1,174 (32.2%)                      |
| <b>Subtotal</b>                                         | <b>23,114 (37.4%)</b>              | <b>6,022 (42.3%)</b>               | <b>652 (49.2%)</b>               | <b>5,653 (53.3%)</b>               | <b>6,336 (39.6%)</b>               | <b>3,643 (20.4%)</b>               |
| <b>Selective Noradrenaline Reuptake Inhibitors</b>      |                                    |                                    |                                  |                                    |                                    |                                    |
| Desvenlafaxine                                          | 0 (0.0%)                           | 1 (0.0%)                           | 4 (0.3%)                         | 28 (0.2%)                          | -                                  | -                                  |
| Duloxetine                                              | 3,190 (5.2%)                       | 161 (1.1%)                         | 57 (4.3%)                        | 267 (2.5%)                         | 156 (0.9%)                         | 241 (1.3%)                         |
| Milnacipran                                             | 0 (0.0%)                           | -                                  | -                                | 2 (0.0%)                           | -                                  | 18 (0.1%)                          |
| Venlafaxine                                             | 3,323 (5.4%)                       | 1,514 (10.6%)                      | 105 (7.9%)                       | 434 (4.0%)                         | 144 (0.8%)                         | 206 (1.1%)                         |
| <b>Subtotal</b>                                         | <b>6,513 (10.5%)</b>               | <b>1,676 (11.7%)</b>               | <b>166 (12.5%)</b>               | <b>731 (6.9%)</b>                  | <b>290 (1.8%)</b>                  | <b>465 (2.6%)</b>                  |
| <b>Tricyclic Antidepressants</b>                        |                                    |                                    |                                  |                                    |                                    |                                    |
| Amitriptyline                                           | 10,448 (16.9%)                     | 2,629 (18.4%)                      | 120 (9.0%)                       | 796 (7.5%)                         | 7,255 (45.4%)                      | 1,181 (6.6%)                       |
| Dosulepin                                               | -                                  | -                                  | -                                | -                                  | 177 (1.1%)                         | 25 (0.2%)                          |
| Imipramine                                              | -                                  | -                                  | -                                | 32 (0.3%)                          | 54 (0.3%)                          | 7,340 (41.2%)                      |
| Nortriptyline                                           | 3,158 (5.1%)                       | 95 (0.6%)                          | 18 (1.3%)                        | 566 (5.3%)                         | 208 (1.3%)                         | -                                  |
| Other TCAs                                              | 1,860 (12.0%)                      | 263 (1.8%)                         | 24 (1.8%)                        | 117 (1.1%)                         | 113 (0.7%)                         | 778 (4.4%)                         |
| <b>Subtotal</b>                                         | <b>15,466 (25.0%)</b>              | <b>2,987 (21.0%)</b>               | <b>162 (12.2%)</b>               | <b>1,511 (14.2%)</b>               | <b>7,807 (48.8%)</b>               | <b>9,324 (52.4%)</b>               |
| <b>Serotonin Antagonist &amp; Reuptake Inhibitors</b>   |                                    |                                    |                                  |                                    |                                    |                                    |
| Trazodone                                               | 12,373 (20.1%)                     | 2,362 (16.6%)                      | 192 (14.5%)                      | 1,279 (12.0%)                      | 360 (2.2%)                         | 3,574 (20.0%)                      |
| <b>Norepinephrine-Dopamine Reuptake Inhibitors</b>      |                                    |                                    |                                  |                                    |                                    |                                    |
| Bupropion                                               | 1,406 (2.3%)                       | 278 (1.9%)                         | 49 (3.7%)                        | 1,056 (9.9%)                       | 34 (0.2%)                          | 215 (1.2%)                         |
| <b>Noradrenergic Serotonin Specific Antidepressants</b> |                                    |                                    |                                  |                                    |                                    |                                    |
| Mirtazapine                                             | 2,819 (4.6%)                       | 892 (6.2%)                         | 103 (7.7%)                       | 354 (3.3%)                         | 1,141 (7.1%)                       | 535 (3.0%)                         |
| <b>Subtotal</b>                                         | <b>16,598 (26.9%)</b>              | <b>3,532 (24.8%)</b>               | <b>344 (26.0%)</b>               | <b>2,689 (25.4%)</b>               | <b>1,535 (9.6%)</b>                | <b>4,324 (24.3%)</b>               |
| <b>Other Antidepressants</b>                            | <b>5 (0.0%)</b>                    | <b>0 (0.0%)</b>                    | <b>0 (0.0%)</b>                  | <b>2 (0.0%)</b>                    | <b>2 (0.0%)</b>                    | <b>34 (0.2%)</b>                   |

1. Other tricyclic antidepressants include Amoxapine, Clomipramine, Desipramine, Doxepin, Lofepramine, and Trimipramine

2. Other antidepressants include Nefazodone, Maprotiline, Agomelatine, and Roboxetine

**Table 4 The Prevalence of Potential Therapeutic Indications; Depression, Other Mental Health Problems, and Chronic Pain Among New Antidepressant Users, and the Proportion of Persons with Depression who had Other Concurrent Mental Health Problems or Pain by Jurisdiction**

|                                  | Canada                                |                                        |                                         | USA                           | United Kingdom              | Taiwan                        |
|----------------------------------|---------------------------------------|----------------------------------------|-----------------------------------------|-------------------------------|-----------------------------|-------------------------------|
|                                  | Ontario Sample<br>(N=60,366 patients) | Montreal Sample<br>(N=13,303 patients) | Quebec City & Mtl<br>(N=1,308 patients) | Boston<br>(N=10,131 patients) | CPRD<br>(N=15,868 patients) | NHIRDB<br>(N=17,580 patients) |
| <b>Depression</b>                |                                       |                                        |                                         |                               |                             |                               |
| Prevalence, N (%)                | 7,484 (12.4%)                         | 2333 (17.5%)                           | 563 (43.0%)                             | 2203 (21.7%)                  | 2478 (15.6%)                | 1603 (9.1%)                   |
| <b>Alcohol/Drug Abuse</b>        |                                       |                                        |                                         |                               |                             |                               |
| Prevalence, N (%)                | 1989 (3.3%)                           | 326 (2.5%)                             | 23 (1.8%)                               | 290 (2.9%)                    | 4188 (26.4%)                | 224 (1.3%)                    |
| Abuse in Depressed, N (%)        | 450 (6.0%)                            | 97 (4.2%)                              | 12 (2.1%)                               | 194 (8.8%)                    | 795 (32.1%)                 | 25 (1.6%)                     |
| Prevalence Ratio                 | 2.1                                   | 2.0                                    | 1.4                                     | 7.3                           | 1.3                         | 1.3                           |
| <b>Anxiety</b>                   |                                       |                                        |                                         |                               |                             |                               |
| Prevalence, N (%)                | 23374 (38.7%)                         | 3641 (27.4%)                           | 465 (35.6%)                             | 1798 (17.7%)                  | 1914 (12.1%)                | 6277 (35.7%)                  |
| Anxiety in Depressed, N (%)      | 3684 (49.2%)                          | 807 (34.6%)                            | 218 (38.7%)                             | 905 (41.1%)                   | 588 (23.7%)                 | 767 (47.8%)                   |
| Prevalence Ratio                 | 1.3                                   | 1.3                                    | 1.2                                     | 3.6                           | 2.4                         | 1.4                           |
| <b>Major Mental Illness</b>      |                                       |                                        |                                         |                               |                             |                               |
| Prevalence, N (%)                | 2627 (4.4%)                           | 692 (5.2%)                             | 50 (3.8%)                               | 502 (5.0%)                    | 253 (1.6%)                  | 570 (3.2%)                    |
| Mental Ill. In Depressed, N (%)  | 1473 (19.7%)                          | 225 (9.6%)                             | 23 (4.1%)                               | 323 (14.7%)                   | 79 (3.2%)                   | 95 (5.9%)                     |
| Prevalence Ratio                 | 9.0                                   | 2.3                                    | 1.1                                     | 6.5                           | 2.5                         | 2.0                           |
| <b>Suicide Attempt</b>           |                                       |                                        |                                         |                               |                             |                               |
| Prevalence, N (%)                | 101 (0.2%)                            | 30 (0.2%)                              | -                                       | 72 (0.7%)                     | 129 (0.8%)                  | 6 (0.0%)                      |
| Suicide Att. in Depressed, N (%) | 80 (1.1%)                             | 8 (0.3%)                               | -                                       | 67 (3.0%)                     | 67 (2.7%)                   | 2 (0.1%)                      |
| Prevalence Ratio                 | 26.9                                  | 1.7                                    | -                                       | 48.2                          | 5.8                         | 5.0                           |
| <b>Chronic Pain</b>              |                                       |                                        |                                         |                               |                             |                               |
| Prevalence, N (%)                | 28687 (47.5%)                         | 6379 (48.0%)                           | 571 (43.7%)                             | 5200 (51.3%)                  | 6539 (41.2%)                | 11994 (68.2%)                 |
| Pain in Depressed, N (%)         | 3591 (48.0%)                          | 1105 (47.4%)                           | 235 (41.7%)                             | 1365 (62.0%)                  | 1021 (41.2%)                | 994 (62.0%)                   |
| Prevalence Ratio                 | 1.0                                   | 1.0                                    | 0.9                                     | 1.3                           | 1.0                         | 0.9                           |

Table 5 Starting Therapy for New Users of Antidepressants by Potential Therapeutic Indication by Therapeutic Class and Country

| Therapeutic Class                                                                    | Canada                                |                                        |                                         | United States                 | United Kingdom              | Taiwan                        |
|--------------------------------------------------------------------------------------|---------------------------------------|----------------------------------------|-----------------------------------------|-------------------------------|-----------------------------|-------------------------------|
|                                                                                      | Ontario Sample<br>(N=60,366 patients) | Montreal Sample<br>(N=13,303 patients) | Quebec City & Mtl<br>(N=1,308 patients) | Boston<br>(N=10,131 patients) | CPRD<br>(N=15,868 patients) | NHIRDB<br>(N=17,580 patients) |
|                                                                                      | N Rx (%)                              | N Rx (%)                               | N Rx (%)                                | N Rx (%)                      | N Rx (%)                    | N Rx (%)                      |
| <b>Starting Therapy for Persons with a Diagnosis of Depression</b>                   |                                       |                                        |                                         |                               |                             |                               |
| Selective Serotonin Re. Inh.                                                         | 4,357 (55.2%)                         | 1,548 (59.5%)                          | 386 (67.5%)                             | 1,388 (59.0%)                 | 1,797 (71.4%)               | 930 (55.8%)                   |
| Selective Noradrenaline Re. Inh.                                                     | 1,039 (13.2%)                         | 408 (15.7%)                            | 72 (12.6%)                              | 162 (6.9%)                    | 67 (2.7%)                   | 104 (6.2%)                    |
| Tricyclic Antidepressants                                                            | 647 (8.2%)                            | 129 (5.0%)                             | 20 (3.5%)                               | 179 (7.6%)                    | 319 (12.7%)                 | 138 (8.3%)                    |
| Serotonin Antagonist & Re. Inh.                                                      | 940 (11.9%)                           | 212 (8.2%)                             | 32 (5.6%)                               | 269 (11.4%)                   | 56 (2.2%)                   | 263 (15.8%)                   |
| Norepinephrine-Dopam Re. Inh.                                                        | 321 (4.1%)                            | 81 (3.1%)                              | 30 (5.2%)                               | 233 (9.9%)                    | 1 (0.0%)                    | 43 (2.6%)                     |
| Noradrenergic serotonin specific                                                     | 590 (7.5%)                            | 224 (8.6%)                             | 32 (5.6%)                               | 120 (5.1%)                    | 277 (11.0%)                 | 184 (11.0%)                   |
| Other                                                                                | 1 (0.0%)                              | -                                      | -                                       | 1 (0.0%)                      | -                           | 4 (0.2%)                      |
| <b>Starting Therapy for Persons with a Diagnosis of Chronic Pain</b>                 |                                       |                                        |                                         |                               |                             |                               |
| Selective Serotonin Re. Inh.                                                         | 9,823 (33.5%)                         | 2,643 (39.0%)                          | 268 (46.4%)                             | 2,481 (46.1%)                 | 2,085 (31.8%)               | 2,291 (18.9%)                 |
| Selective Noradrenaline Re. Inh.                                                     | 3,516 (12.0%)                         | 762 (11.2%)                            | 83 (14.4%)                              | 395 (7.3%)                    | 95 (1.5%)                   | 315 (2.6%)                    |
| Tricyclic Antidepressants                                                            | 8,771 (29.9%)                         | 1,863 (27.5%)                          | 100 (17.3%)                             | 1,176 (21.8%)                 | 3,963 (60.4%)               | 6,703 (55.2%)                 |
| Serotonin Antagonist & Re. Inh.                                                      | 5,410 (18.5%)                         | 1,020 (15.0%)                          | 65 (11.3%)                              | 703 (13.0%)                   | 89 (1.4%)                   | 2,353 (19.4%)                 |
| Norepinephrine-Dopam Re. Inh.                                                        | 551 (1.9%)                            | 108 (1.6%)                             | 24 (4.2%)                               | 424 (7.9%)                    | 17 (0.3%)                   | 126 (1.0%)                    |
| Noradrenergic serotonin specific                                                     | 1,221 (4.2%)                          | 386 (5.7%)                             | 38 (6.6%)                               | 211 (3.9%)                    | 315 (4.8%)                  | 330 (2.7%)                    |
| Other                                                                                | 3 (0.0%)                              | -                                      | -                                       | 2 (0.0%)                      | 1 (0.02%)                   | 27 (0.2%)                     |
| <b>Starting Therapy for Persons with a Diagnosis of Other Mental Health Problems</b> |                                       |                                        |                                         |                               |                             |                               |
| Selective Serotonin Re. Inh.                                                         | 13,018 (49.5%)                        | 2,459 (53.3%)                          | 309 (61.1%)                             | 1,384 (61.4%)                 | 2,565 (45.1%)               | 2,212 (32.3%)                 |
| Selective Noradrenaline Re. Inh.                                                     | 3,099 (11.8%)                         | 550 (11.9%)                            | 61 (12.1%)                              | 147 (6.5%)                    | 105 (1.9%)                  | 254 (3.7%)                    |
| Tricyclic Antidepressants                                                            | 3,823 (14.5%)                         | 563 (12.2%)                            | 28 (5.5%)                               | 186 (8.2%)                    | 2,518 (44.3%)               | 2,250 (32.8%)                 |
| Serotonin Antagonist & Re. Inh.                                                      | 4,107 (15.6%)                         | 591 (12.8%)                            | 53 (10.5%)                              | 280 (12.4%)                   | 102 (1.8%)                  | 1,684 (24.6%)                 |
| Norepinephrine-Dopam Re. Inh.                                                        | 773 (2.9%)                            | 98 (2.1%)                              | 18 (3.6%)                               | 163 (7.2%)                    | 20 (0.4%)                   | 126 (1.8%)                    |
| Noradrenergic serotonin specific                                                     | 1,480 (5.6%)                          | 357 (7.7%)                             | 37 (7.3%)                               | 94 (4.2%)                     | 374 (6.6%)                  | 318 (4.6%)                    |
| Other                                                                                | 3 (0.0%)                              | -                                      | -                                       | 2 (0.1%)                      | 1 (0.0%)                    | 15 (0.2%)                     |



**Table 6A Characteristics of the First Antidepressant Treatment Episode Among Persons with a Diagnosis of Depression**

| Characteristics                    | Canada      |           |                 |           | United States     |           | United Kingdom |           | Taiwan      |           |             |           |
|------------------------------------|-------------|-----------|-----------------|-----------|-------------------|-----------|----------------|-----------|-------------|-----------|-------------|-----------|
|                                    | Ontario     |           | Montreal Sample |           | Quebec City & Mtl |           | Boston         |           | CPRD        |           | NHIRDB      |           |
|                                    | N           | %         | N               | %         | N                 | %         | N              | %         | N           | %         | N           | %         |
| <b>All patients</b>                | 4,407       | 100%      | 1,221           | 100%      | 324               | 100%      | 1,259          | 100%      | 2,152       | 100%      | 835         | 100%      |
| <b>No treatment change</b>         | 2,383       | 54%       | 680             | 56%       | 220               | 68%       | 757            | 60%       | 1,317       | 61%       | 566         | 68%       |
| <b>Treatment change</b>            | 2,024       | 46%       | 541             | 44%       | 104               | 32%       | 502            | 40%       | 835         | 39%       | 269         | 32%       |
|                                    | <b>Mean</b> | <b>SD</b> | <b>Mean</b>     | <b>SD</b> | <b>Mean</b>       | <b>SD</b> | <b>Mean</b>    | <b>SD</b> | <b>Mean</b> | <b>SD</b> | <b>Mean</b> | <b>SD</b> |
| <b>All patients</b>                |             |           |                 |           |                   |           |                |           |             |           |             |           |
| Dose*                              | 1.3         | 1.0       | 0.9             | 0.6       | 0.9               | 0.5       | 1.3            | 0.8       | 1.0         | 0.5       | 0.7         | 0.4       |
| Duration (days)                    | 519.5       | 285.1     | 462.5           | 298.9     | 467.7             | 255.0     | 395.6          | 266.2     | 356.2       | 278.7     | 217.0       | 248.0     |
| <b>No treatment change**</b>       |             |           |                 |           |                   |           |                |           |             |           |             |           |
| Dose                               | 0.9         | 0.7       | 0.7             | 0.4       | 0.8               | 0.4       | 1.0            | 0.9       | 0.8         | 0.4       | 0.6         | 0.4       |
| Duration (days)                    | 289.1       | 309.6     | 246.3           | 290.4     | 340.9             | 243.2     | 225.7          | 212.3     | 192.8       | 239.9     | 104.7       | 179.7     |
| <b>Treatment change**</b>          |             |           |                 |           |                   |           |                |           |             |           |             |           |
| Dose                               | 1.5         | 1.0       | 1.0             | 0.6       | 1.1               | 0.6       | 1.4            | 0.8       | 1.2         | 0.6       | 0.8         | 0.4       |
| Duration (days)                    | 616.9       | 209.8     | 569.0           | 240.8     | 574.7             | 213.9     | 507.7          | 239.4     | 469.5       | 247.6     | 312.6       | 260.2     |
|                                    | <b>N</b>    | <b>%</b>  | <b>N</b>        | <b>%</b>  | <b>N</b>          | <b>%</b>  | <b>N</b>       | <b>%</b>  | <b>N</b>    | <b>%</b>  | <b>N</b>    | <b>%</b>  |
| <b>Type of changes***</b>          |             |           |                 |           |                   |           |                |           |             |           |             |           |
| Added molecule (different class)   | 796         | 18%       | 139             | 11%       | 31                | 10%       | 125            | 10%       | 125         | 6%        | 72          | 9%        |
| Added molecule (same class)        | 174         | 4%        | 22              | 2%        | 6                 | 2%        | 42             | 3%        | 54          | 3%        | 26          | 3%        |
| Dose decrease                      | 921         | 21%       | 246             | 20%       | 38                | 12%       | 151            | 12%       | 407         | 19%       | 105         | 13%       |
| Dose increase                      | 1,464       | 33%       | 387             | 32%       | 64                | 20%       | 348            | 28%       | 611         | 28%       | 171         | 20%       |
| Removed molecule (different class) | 710         | 16%       | 132             | 11%       | 26                | 8%        | 34             | 3%        | 19          | 1%        | 75          | 9%        |
| Removed molecule (same class)      | 178         | 4%        | 23              | 2%        | 5                 | 2%        | 6              | 0%        | 6           | 0%        | 28          | 3%        |
| Switch class                       | 10          | 0%        | 48              | 4%        | -                 | -         | 56             | 4%        | 70          | 3%        | 1           | 0%        |
| Switch molecule (same class)       | 5           | 0%        | 11              | 1%        | -                 | -         | 19             | 2%        | 24          | 1%        | -           | -         |

\*Dose is the proportion of the WHO recommended daily dose (dose prescribed/recommended daily dose)

\*\*Treatment change in the first antidepressant episode, defined as continuous therapy with gaps of no greater than 90 days

\*\*\*Patients can have >1 type of change in the episode of antidepressant use.

**Table 6B. Characteristics of the First Antidepressant Treatment Episode Among Persons with a Diagnosis of Chronic Pain**

| Characteristics                    | Canada      |           |                 |           | United States     |           |             |           | United Kingdom |           | Taiwan      |           |
|------------------------------------|-------------|-----------|-----------------|-----------|-------------------|-----------|-------------|-----------|----------------|-----------|-------------|-----------|
|                                    | Ontario     |           | Montreal Sample |           | Quebec City & Mtl |           | Boston      |           | CPRD           |           | NHIRDB      |           |
|                                    | N           | %         | N               | %         | N                 | %         | N           | %         | N              | %         | N           | %         |
| <b>All patients, all changes</b>   | 16045       | 100%      | 3276            | 100%      | 349               | 100%      | 2657        | 100%      | 5360           | 100%      | 6029        | 100%      |
| <b>No treatment change</b>         | 10650       | 66%       | 2220            | 68%       | 261               | 75%       | 1793        | 67%       | 4017           | 75%       | 4761        | 79%       |
| <b>Treatment change</b>            | 5395        | 34%       | 1056            | 32%       | 88                | 25%       | 864         | 33%       | 1343           | 25%       | 1268        | 21%       |
|                                    | <b>Mean</b> | <b>SD</b> | <b>Mean</b>     | <b>SD</b> | <b>Mean</b>       | <b>SD</b> | <b>Mean</b> | <b>SD</b> | <b>Mean</b>    | <b>SD</b> | <b>Mean</b> | <b>SD</b> |
| <b>All patients, all changes</b>   |             |           |                 |           |                   |           |             |           |                |           |             |           |
| Dose*                              | 0.9         | 0.7       | 0.7             | 0.5       | 0.8               | 0.6       | 1.0         | 0.8       | 0.6            | 0.5       | 0.5         | 0.4       |
| Duration (days)                    | 416.3       | 312.8     | 407.8           | 313.7     | 437.0             | 263.6     | 384.6       | 261.7     | 257.6          | 270.8     | 168.9       | 227.3     |
| <b>No treatment change**</b>       |             |           |                 |           |                   |           |             |           |                |           |             |           |
| Dose                               | 0.6         | 0.5       | 0.4             | 0.3       | 0.6               | 0.5       | 0.8         | 0.7       | 0.40           | 0.4       | 0.4         | 0.3       |
| Duration (days)                    | 198.7       | 271.4     | 202.1           | 270.2     | 300.9             | 238.6     | 247.4       | 223.3     | 122.3          | 192       | 83.6        | 154.6     |
| <b>Treatment change**</b>          |             |           |                 |           |                   |           |             |           |                |           |             |           |
| Dose                               | 1           | 0.7       | 0.8             | 0.5       | 1.0               | 0.6       | 1.1         | 0.7       | 0.7            | 0.5       | 0.5         | 0.4       |
| Duration (days)                    | 534.6       | 260.5     | 534.7           | 265.1     | 590.0             | 201.5     | 482.2       | 239.6     | 398.0          | 266.9     | 264.4       | 252.8     |
|                                    | <b>N</b>    | <b>%</b>  | <b>N</b>        | <b>%</b>  | <b>N</b>          | <b>%</b>  | <b>N</b>    | <b>%</b>  | <b>N</b>       | <b>%</b>  | <b>N</b>    | <b>%</b>  |
| <b>Type of changes***</b>          |             |           |                 |           |                   |           |             |           |                |           |             |           |
| Added molecule (different class)   | 1776        | 11%       | 267             | 8%        | 30                | 9%        | 189         | 7%        | 159            | 3%        | 245         | 4%        |
| Added molecule (same class)        | 375         | 2%        | 31              | 1%        | 5                 | 1%        | 69          | 3%        | 68             | 1%        | 90          | 1%        |
| Dose decrease                      | 2291        | 14%       | 455             | 14%       | 32                | 9%        | 243         | 9%        | 629            | 12%       | 569         | 9%        |
| Dose increase                      | 3980        | 25%       | 818             | 25%       | 58                | 17%       | 611         | 23%       | 1032           | 19%       | 809         | 13%       |
| Removed molecule (different class) | 1547        | 10%       | 245             | 7%        | 26                | 7%        | 47          | 2%        | 14             | 0%        | 262         | 4%        |
| Removed molecule (same class)      | 372         | 2%        | 32              | 1%        | 4                 | 1%        | 6           | 0%        | 7              | 0%        | 95          | 2%        |
| Switch class                       | 30          | 0%        | 120             | 4%        | -                 | -         | 92          | 3%        | 77             | 1%        | 15          | 0%        |
| Switch molecule (same class)       | 22          | 0%        | 30              | 1%        | -                 | -         | 27          | 1%        | 29             | 1%        | 4           | 0%        |

\*Dose is the proportion of the WHO recommended daily dose (dose prescribed/recommended daily dose)

\*\*Treatment change in the first antidepressant episode, defined as continuous therapy with gaps of no greater than 90 days

\*\*\*Patients can have >1 type of change in the episode of antidepressant use.

**APPENDIX****DEPRESSION****At least one ICD-9 in:**

- 311 Depressive disorder, not elsewhere classified
- 296.2 Major depressive disorder, single episode
- 296.3 Major depressive disorder, recurrent episode
- 309 Adjustment reaction
  - 309.0 Adjustment disorder with depressed mood
  - 309.1 Prolonged depressive reaction
  - 309.2 With predominant disturbance of other emotions
  - 309.3 Adjustment disorder with disturbance of conduct
  - 309.4 Adjustment disorder with mixed disturbance of emotions and conduct
  - 309.8 Other specified adjustment reactions
  - 309.9 Unspecified adjustment reaction

OR

**At least one ICD-10 in:**

- F32 Depressive episode
  - F32.0 Mild depressive episode
  - F32.1 Moderate depressive episode
  - F32.2 Severe depressive episode without psychotic symptoms
  - F32.3 Severe depressive episode with psychotic symptoms
  - F32.8 Other depressive episodes
  - F32.9 Depressive episode, unspecified
- F33 Recurrent depressive disorder
  - F33.0 Recurrent depressive disorder, current episode mild
  - F33.1 Recurrent depressive disorder, current episode moderate
  - F33.2 Recurrent depressive disorder, current episode severe without psychotic symptoms
  - F33.3 Recurrent depressive disorder, current episode severe with psychotic symptoms
  - F33.4 Recurrent depressive disorder, currently in remission
  - F33.8 Other recurrent depressive disorders
  - F33.9 Recurrent depressive disorder, unspecified
- F41.2 Mixed anxiety and depressive disorder

OR

**At least one READ code in:†:**

|         |                         |         |                                                              |
|---------|-------------------------|---------|--------------------------------------------------------------|
| E2B..00 | Depressive disorder NEC | Eu32311 | [X]Single episode of major depression and psychotic symptoms |
| Eu32z11 | [X]Depression NOS       | E113400 | Recurrent major depressive episodes, severe, with            |

|    |         |                                              |         |                                                               |
|----|---------|----------------------------------------------|---------|---------------------------------------------------------------|
| 1  | E112.14 | Endogenous depression                        | E113z00 | psychosis                                                     |
| 2  | E200300 | Anxiety with depression                      | E113300 | Recurrent major depressive episode NOS                        |
| 3  |         |                                              |         |                                                               |
| 4  | E135.00 | Agitated depression                          | E11y200 | Recurrent major depressive episodes, severe, no psychosis     |
| 5  | E204.00 | Neurotic depression reactive type            | E11y200 | Atypical depressive disorder                                  |
| 6  | E290.00 | Brief depressive reaction                    | E001300 | Presenile dementia with depression                            |
| 7  | 2257.00 | O/E - depressed                              | Eu02z16 | [X] Senile dementia, depressed or paranoid type               |
| 8  | 1B17.00 | Depressed                                    | Eu32z13 | [X]Prolonged single episode of reactive depression            |
| 9  | E11..12 | Depressive psychoses                         | Eu33.14 | [X]Seasonal depressive disorder                               |
| 10 | E204.11 | Postnatal depression                         | Eu32314 | [X]Single episode of reactive depressive psychosis            |
| 11 | 1465.00 | H/O: depression                              | E113100 | Recurrent major depressive episodes, mild                     |
| 12 |         |                                              | Eu33100 | [X]Recurrent depressive disorder, current episode moderate    |
| 13 |         |                                              |         |                                                               |
| 14 | 62T1.00 | Puerperal depression                         | R007z13 | [D]Postoperative depression                                   |
| 15 | Eu32z00 | [X]Depressive episode, unspecified           | Eu33000 | [X]Recurrent depressive disorder, current episode mild        |
| 16 |         |                                              |         |                                                               |
| 17 | E2B0.00 | Postviral depression                         | Eu33314 | [X]Recurr severe episodes/psychogenic depressive psychosis    |
| 18 |         |                                              |         |                                                               |
| 19 | Eu32z12 | [X]Depressive disorder NOS                   | E112400 | Single major depressive episode, severe, with psychosis       |
| 20 |         |                                              |         |                                                               |
| 21 | Eu33.00 | [X]Recurrent depressive disorder             | Eu92000 | [X]Depressive conduct disorder                                |
| 22 | E2B1.00 | Chronic depression                           | Eu33313 | [X]Recurr severe episodes/major depression+psychotic symptom  |
| 23 |         |                                              |         |                                                               |
| 24 | Eu32.00 | [X]Depressive episode                        | Eu33200 | [X]Recurr depress disorder cur epi severe without psych sympt |
| 25 |         |                                              |         |                                                               |
| 26 | 1B17.11 | C/O - feeling depressed                      | E112000 | Single major depressive episode, unspecified                  |
| 27 | Eu53012 | [X]Postpartum depression NOS                 | E113000 | Recurrent major depressive episodes, unspecified              |
| 28 | E112.11 | Agitated depression                          | E290z00 | Brief depressive reaction NOS                                 |
| 29 | Eu32z14 | [X] Reactive depression NOS                  | Eu33z11 | [X]Monopolar depression NOS                                   |
| 30 | E113700 | Recurrent depression                         | Eu33316 | [X]Recurrent severe episodes/reactive depressive psychosis    |
| 31 |         |                                              |         |                                                               |
| 32 | E112.12 | Endogenous depression first episode          | E002z00 | Senile dementia with depressive or paranoid features NOS      |
| 33 |         |                                              |         |                                                               |
| 34 | Eu32y00 | [X]Other depressive episodes                 | Eu32211 | [X]Single episode agitated depressn w/out psychotic symptoms  |
| 35 |         |                                              |         |                                                               |
| 36 | E113.11 | Endogenous depression - recurrent            | E004300 | Arteriosclerotic dementia with depression                     |
| 37 | E112.13 | Endogenous depression first episode          | E112500 | Single major depressive episode, partial or unspec remission  |
| 38 |         |                                              |         |                                                               |
| 39 | E112z00 | Single major depressive episode NOS          | Eu33z00 | [X]Recurrent depressive disorder, unspecified                 |
| 40 | Eu32.13 | [X]Single episode of reactive depression     | E002.00 | Senile dementia with depressive or paranoid features          |
| 41 |         |                                              |         |                                                               |
| 42 | Eu34113 | [X]Neurotic depression                       | E02y300 | Drug-induced depressive state                                 |
| 43 | Eu41211 | [X]Mild anxiety depression                   | Eu33300 | [X]Recurrent depress disorder cur epi severe with psych symp  |
| 44 |         |                                              |         |                                                               |
| 45 | Eu34100 | [X]Dysthymia                                 | Eu33y00 | [X]Other recurrent depressive disorders                       |
| 46 | Eu34111 | [X]Depressive neurosis                       | Eu32312 | [X]Single episode of psychogenic depressive psychosis         |
| 47 |         |                                              |         |                                                               |
| 48 | Eu33.15 | [X]SAD - Seasonal affective disorder         | E113600 | Recurrent major depressive episodes, in full remission        |
| 49 |         |                                              |         |                                                               |
| 50 | Eu33.11 | [X]Recurrent episodes of depressive reaction | E113500 | Recurrent major depressive episodes,partial/unspec remission  |
| 51 |         |                                              |         |                                                               |
| 52 | Eu33.13 | [X]Recurrent episodes of reactive depression | Eu32y12 | [X]Single episode of masked depression NOS                    |
| 53 |         |                                              |         |                                                               |
| 54 |         |                                              |         |                                                               |
| 55 |         |                                              |         |                                                               |
| 56 |         |                                              |         |                                                               |
| 57 |         |                                              |         |                                                               |
| 58 |         |                                              |         |                                                               |
| 59 |         |                                              |         |                                                               |
| 60 |         |                                              |         |                                                               |

|    |                                                                    |                                                                     |
|----|--------------------------------------------------------------------|---------------------------------------------------------------------|
| 1  | Eu32.11 [X]Single episode of depressive reaction                   | E112600 Single major depressive episode, in full remission          |
| 2  | E11z200 Masked depression                                          | Eu32213 [X]Single episode vital depression w/out psychotic symptoms |
| 3  |                                                                    |                                                                     |
| 4  | Eu32100 [X]Moderate depressive episode                             | Eu33214 [X]Vital depression, recurrent without psychotic symptoms   |
| 5  |                                                                    |                                                                     |
| 6  | Eu32200 [X]Severe depressive episode without psychotic symptoms    | Eu32600 [X]Major depression, moderately severe                      |
| 7  |                                                                    |                                                                     |
| 8  | 1B1U.00 Symptoms of depression                                     | Eu32500 [X]Major depression, mild                                   |
| 9  | 1BT..00 Depressed mood                                             | Eu32700 [X]Major depression, severe without psychotic symptoms      |
| 10 |                                                                    |                                                                     |
| 11 | 1B1U.11 Depressive symptoms                                        | Eu32800 [X]Major depression, severe with psychotic symptoms         |
| 12 |                                                                    |                                                                     |
| 13 | E112.00 Single major depressive episode                            | Eu32900 [X]Single major depr ep, severe with psych, psych in remiss |
| 14 |                                                                    |                                                                     |
| 15 | Eu32400 [X]Mild depression                                         | Eu32A00 [X]Recurr major depr ep, severe with psych, psych in remiss |
| 16 |                                                                    |                                                                     |
| 17 |                                                                    |                                                                     |
| 18 | Eu32y11 [X]Atypical depression                                     | Eu32B00 [X]Antenatal depression                                     |
| 19 | E118.00 Seasonal affective disorder                                | Eu34114 [X]Persistant anxiety depression                            |
| 20 | Eu33212 [X]Major depression, recurrent without psychotic symptoms  | E112100 Single major depressive episode, mild                       |
| 21 |                                                                    |                                                                     |
| 22 | Eu33211 [X]Endogenous depression without psychotic symptoms        | E291.00 Prolonged depressive reaction                               |
| 23 |                                                                    |                                                                     |
| 24 | Eu32000 [X]Mild depressive episode                                 | Eu33315 [X]Recurrent severe episodes of psychotic depression        |
| 25 |                                                                    |                                                                     |
| 26 |                                                                    |                                                                     |
| 27 | Eu41200 [X]Mixed anxiety and depressive disorder                   | Eu32.12 [X]Single episode of psychogenic depression                 |
| 28 |                                                                    |                                                                     |
| 29 | Eu32300 [X]Severe depressive episode with psychotic symptoms       | Eu3y111 [X]Recurrent brief depressive episodes                      |
| 30 |                                                                    |                                                                     |
| 31 | Eu53011 [X]Postnatal depression NOS                                | Eu33.12 [X]Recurrent episodes of psychogenic depression             |
| 32 | E113200 Recurrent major depressive episodes, moderate              | Eu20400 [X]Post-schizophrenic depression                            |
| 33 |                                                                    |                                                                     |
| 34 | E113.00 Recurrent major depressive episode                         | E002100 Senile dementia with depression                             |
| 35 | E112200 Single major depressive episode, moderate                  | Eu33400 [X]Recurrent depressive disorder, currently in remission    |
| 36 |                                                                    |                                                                     |
| 37 | E112300 Single major depressive episode, severe, without psychosis | Eu32212 [X]Single episode major depression w/out psychotic symptoms |
| 38 |                                                                    |                                                                     |
| 39 | Eu32313 [X]Single episode of psychotic depression                  | Eu33311 [X]Endogenous depression with psychotic symptoms            |
| 40 |                                                                    |                                                                     |
| 41 |                                                                    |                                                                     |
| 42 |                                                                    |                                                                     |
| 43 |                                                                    |                                                                     |
| 44 |                                                                    |                                                                     |
| 45 |                                                                    |                                                                     |
| 46 |                                                                    |                                                                     |
| 47 |                                                                    |                                                                     |
| 48 |                                                                    |                                                                     |
| 49 |                                                                    |                                                                     |
| 50 |                                                                    |                                                                     |
| 51 |                                                                    |                                                                     |
| 52 |                                                                    |                                                                     |
| 53 |                                                                    |                                                                     |
| 54 |                                                                    |                                                                     |
| 55 |                                                                    |                                                                     |
| 56 |                                                                    |                                                                     |
| 57 |                                                                    |                                                                     |
| 58 |                                                                    |                                                                     |
| 59 |                                                                    |                                                                     |
| 60 |                                                                    |                                                                     |

**ANXIETY****At least one ICD-9 in:**

300 Anxiety, dissociative and somatoform disorders

OR

**At least one ICD-10 in:**

F40 Phobic anxiety disorders  
 F41 Other anxiety disorders (except F41.2)  
 F42 Obsessive-compulsive disorder  
 F43 Reaction to severe stress, and adjustment disorders  
 F44 Dissociative and conversion disorders  
 F45 Somatoform disorders  
 F48 Other nonpsychotic mental disorders

OR

**At least one READ code in:**

|         |                                 |         |                                              |
|---------|---------------------------------|---------|----------------------------------------------|
| 1B13.00 | Anxiousness                     | Eu42.11 | [X]Anankastic neurosis                       |
| E28..00 | Acute reaction to stress        | Eu45213 | [X]Hypochondriacal neurosis                  |
| E200111 | Panic attack                    | Eu93100 | [X]Phobic anxiety disorder of childhood      |
| E200.00 | Anxiety states                  | Eu45000 | [X]Somatization disorder                     |
| E200300 | Anxiety with depression         | E201C00 | Phantom pregnancy                            |
| E20z.11 | Nervous breakdown               | E201z12 | Ataxia - hysterical                          |
| Eu41111 | [X]Anxiety neurosis             | E283100 | Acute posttrauma stress state                |
| E202B00 | Cancer phobia                   | Eu41z11 | [X]Anxiety NOS                               |
| E205.11 | Nervous exhaustion              | E28z.00 | Acute stress reaction NOS                    |
| E202800 | Claustrophobia                  | Z4I7211 | Reducing anxiety                             |
| E200400 | Chronic anxiety                 | E29y400 | Adjustment reaction due to hospitalisation   |
| E202.00 | Phobic disorders                | Eu44.13 | [X]Hysteria                                  |
| E203100 | Obsessional neurosis            | Eu44600 | [X]Dissociative anaesthesia and sensory loss |
| E201.00 | Hysteria                        | Eu40y00 | [X]Other phobic anxiety disorders            |
| E202000 | Phobia unspecified              | E28z.13 | Stage fright                                 |
| E202C00 | Dental phobia                   | Eu46.00 | [X]Other neurotic disorders                  |
| Eu40000 | [X]Agoraphobia                  | E202600 | Acrophobia                                   |
| E29..00 | Adjustment reaction             | E28z.11 | Examination fear                             |
| E264200 | Cyclical vomiting - psychogenic | Eu41y11 | [X]Anxiety hysteria                          |
| E202100 | Agoraphobia with panic attacks  | E292312 | Specific work inhibition                     |
| E203.00 | Obsessive-compulsive disorders  | Z4I7200 | Alleviating anxiety                          |
| E205.00 | Neurasthenia - nervous debility | E202700 | Animal phobia                                |
| 1466.00 | H/O: anxiety state              | E201B00 | Compensation neurosis                        |
| E201100 | Hysterical blindness            | Eu45413 | [X]Psychogenic headache                      |
| E20y100 | Writer's cramp neurosis         | E262.00 | Psychogenic cardiovascular symptoms          |
| E264400 | Psychogenic dyspepsia           | E263.00 | Psychogenic skin symptoms                    |
| E200100 | Panic disorder                  | E283z00 | Other acute stress reaction NOS              |
| Eu41012 | [X]Panic state                  | Eu93200 | [X]Social anxiety disorder of childhood      |

|    |         |                                                        |         |                                                              |
|----|---------|--------------------------------------------------------|---------|--------------------------------------------------------------|
| 1  | E201z11 | Aphonia - hysterical                                   | Eu45400 | [X]Persistent somatoform pain disorder                       |
| 2  | E201612 | Globus hystericus                                      | Eu45212 | [X]Dysmorphophobia nondelusional                             |
| 3  | E202A0  | Fear of flying                                         | E262300 | Psychogenic cardiovascular disorder                          |
| 4  | 0       |                                                        |         |                                                              |
| 5  | Eu43100 | [X]Post - traumatic stress disorder                    | E264.00 | Psychogenic gastrointestinal tract symptoms                  |
| 6  | E26..00 | Physiological malfunction arising from mental factors  | Eu43z00 | [X]Reaction to severe stress, unspecified                    |
| 7  |         |                                                        |         |                                                              |
| 8  | E201700 | Hysterical amnesia                                     | E2D0.00 | Disturbance of anxiety and fearfulness childhood/adolescent  |
| 9  |         |                                                        |         |                                                              |
| 10 | E200z00 | Anxiety state NOS                                      | E202900 | Fear of crowds                                               |
| 11 | E200500 | Recurrent anxiety                                      | E202400 | Social phobia, fear of public speaking                       |
| 12 | E200200 | Generalised anxiety disorder                           | E261000 | Psychogenic air hunger                                       |
| 13 | E201800 | Hysterical fugue                                       | Eu43111 | [X]Traumatic neurosis                                        |
| 14 | E264000 | Psychogenic aerophagy                                  | E29y100 | Other post-traumatic stress disorder                         |
| 15 | E26z.00 | Psychosomatic disorder NOS                             | Eu45312 | [X]Da Costa's syndrome                                       |
| 16 | E20..00 | Neurotic disorders                                     | E201511 | Fit - hysterical                                             |
| 17 | Eu42.00 | [X]Obsessive - compulsive disorder                     | Eu40z00 | [X]Phobic anxiety disorder, unspecified                      |
| 18 | E206.00 | Depersonalisation syndrome                             | E261z00 | Psychogenic respiratory symptom NOS                          |
| 19 | Eu41.00 | [X]Other anxiety disorders                             | E201400 | Hysterical paralysis                                         |
| 20 | E203000 | Compulsive neurosis                                    | Eu45111 | [X]Undifferentiated psychosomatic disorder                   |
| 21 | 1B13.11 | Anxiousness - symptom                                  | Eu44400 | [X]Dissociative motor disorders                              |
| 22 | E202E00 | Fear of pregnancy                                      | Eu44.11 | [X]Conversion hysteria                                       |
| 23 | E293000 | Adjustment reaction with aggression                    | E2D0z00 | Disturbance anxiety and fearfulness childhood/adolescent NOS |
| 24 |         |                                                        |         |                                                              |
| 25 | E292000 | Separation anxiety disorder                            | E2D0000 | Childhood and adolescent overanxiousness disturbance         |
| 26 |         |                                                        |         |                                                              |
| 27 | Eu41011 | [X]Panic attack                                        | E29y200 | Adjustment reaction with physical symptoms                   |
| 28 | E200000 | Anxiety state unspecified                              | Eu41112 | [X]Anxiety reaction                                          |
| 29 | Eu40z11 | [X]Phobia NOS                                          | E293100 | Adjustment reaction with antisocial behaviour                |
| 30 | Eu45200 | [X]Hypochondriacal disorder                            | Eu45y14 | [X]Psychogenic torticollis                                   |
| 31 | E29y300 | Elective mutism due to an adjustment reaction          | Eu45414 | [X]Somatoform pain disorder                                  |
| 32 |         |                                                        |         |                                                              |
| 33 | Eu41211 | [X]Mild anxiety depression                             | Eu43211 | [X]Culture shock                                             |
| 34 | Eu43015 | [X]Psychic shock                                       | Eu43011 | [X]Acute crisis reaction                                     |
| 35 | Eu41000 | [X]Panic disorder [episodic paroxysmal anxiety]        | E29z.00 | Adjustment reaction NOS                                      |
| 36 |         |                                                        |         |                                                              |
| 37 | Eu46100 | [X]Depersonalization - derealization syndrome          | E264.11 | Globus abdominalis                                           |
| 38 |         |                                                        |         |                                                              |
| 39 | Eu40.00 | [X]Phobic anxiety disorders                            | E261.00 | Psychogenic respiratory symptoms                             |
| 40 | Eu46011 | [X]Fatigue syndrome                                    | Eu45412 | [X]Psychogenic backache                                      |
| 41 | Eu40200 | [X]Specific (isolated) phobias                         | E283.00 | Other acute stress reactions                                 |
| 42 | E202.12 | Phobic anxiety                                         | Eu42y00 | [X]Other obsessive-compulsive disorders                      |
| 43 | Eu41100 | [X]Generalized anxiety disorder                        | E20y200 | Other occupational neurosis                                  |
| 44 | E202D0  | Fear of death                                          | Eu44300 | [X]Trance and possession disorders                           |
| 45 | 0       |                                                        |         |                                                              |
| 46 | Eu43012 | [X]Acute reaction to stress                            | Eu44100 | [X]Dissociative fugue                                        |
| 47 | Eu43.00 | [X]Reaction to severe stress, and adjustment disorders | Eu44y12 | [X]Multiple personality                                      |
| 48 |         |                                                        |         |                                                              |
| 49 | Eu40213 | [X]Claustrophobia                                      | E201z13 | Ganser's syndrome - hysterical                               |
| 50 | Eu43200 | [X]Adjustment disorders                                | E278.00 | Psychalgia                                                   |
| 51 | Eu46y13 | [X]Occupational neurosis, including writer's cramp     | Eu44000 | [X]Dissociative amnesia                                      |
| 52 |         |                                                        |         |                                                              |
| 53 | Eu44511 | [X]Pseudoseizures                                      | Eu45300 | [X]Somatoform autonomic dysfunction                          |
| 54 | Eu40100 | [X]Social phobias                                      | Eu43213 | [X]Hospitalism in children                                   |
| 55 |         |                                                        |         |                                                              |
| 56 |         |                                                        |         |                                                              |
| 57 |         |                                                        |         |                                                              |
| 58 |         |                                                        |         |                                                              |
| 59 |         |                                                        |         |                                                              |
| 60 |         |                                                        |         |                                                              |

|    |         |                                                             |         |                                                          |
|----|---------|-------------------------------------------------------------|---------|----------------------------------------------------------|
| 1  | Eu43000 | [X]Acute stress reaction                                    | E29y.00 | Other adjustment reactions                               |
| 2  | 146G.00 | H/O: agoraphobia                                            | E201000 | Hysteria unspecified                                     |
| 3  | 1B1V.00 | C/O - panic attack                                          | E261500 | Psychogenic aphonia                                      |
| 4  | Eu41200 | [X]Mixed anxiety and depressive disorder                    | E20y.00 | Other neurotic disorders                                 |
| 5  | E280.00 | Acute panic state due to acute stress reaction              | E2z..00 | Neuroses or other mental disorder NOS                    |
| 6  |         |                                                             |         |                                                          |
| 7  | Eu44411 | [X]Psychogenic aphonia                                      | E281.00 | Acute fugue state due to acute stress reaction           |
| 8  | Eu45500 | [X]Globus pharyngeus                                        | Eu40112 | [X]Social neurosis                                       |
| 9  | Eu40300 | [X]Needle phobia                                            | E20yz00 | Other neurotic disorder NOS                              |
| 10 | Eu40214 | [X]Simple phobia                                            | E201900 | Multiple personality                                     |
| 11 | Eu45316 | [X]Psychogenic cough                                        | Eu45317 | [X]Psychogenic diarrhoea                                 |
| 12 | Eu45322 | [X]Psychogenic hyperventilat                                | E28..11 | Combat fatigue                                           |
| 13 | E202200 | Agoraphobia without mention of panic attacks                | E260.00 | Psychogenic musculoskeletal symptoms                     |
| 14 |         |                                                             |         |                                                          |
| 15 | 2258.00 | O/E - anxious                                               | Eu45311 | [X]Cardiac neurosis                                      |
| 16 | E202z00 | Phobic disorder NOS                                         | Eu41300 | [X]Other mixed anxiety disorders                         |
| 17 | E20z.00 | Neurotic disorder NOS                                       | Eu46y00 | [X]Other specified neurotic disorders                    |
| 18 | Eu40012 | [X]Panic disorder with agoraphobia                          | E265200 | Psychogenic dysmenorrhea                                 |
| 19 | E262z00 | Psychogenic cardiovascular symptom NOS                      | Eu46y16 | [X]Psychogenic syncope                                   |
| 20 | E260z00 | Psychogenic musculoskeletal symptoms NOS                    | E201200 | Hysterical deafness                                      |
| 21 | Eu34114 | [X]Persistant anxiety depression                            | E278200 | Psychogenic backache                                     |
| 22 | E263z00 | Psychogenic skin symptoms NOS                               | E294.00 | Adjustment reaction with disturbance emotion and conduct |
| 23 |         |                                                             |         |                                                          |
| 24 | E262200 | Neurocirculatory asthenia                                   | E201611 | Astasia - abasia, hysterical                             |
| 25 | E262000 | Cardiac neurosis                                            | Eu44y11 | [X]Ganser's syndrome                                     |
| 26 | E20y000 | Somatization disorder                                       | Eu45y11 | [X]Psychogenic dysmenorrhoea                             |
| 27 | E264300 | Psychogenic diarrhoea                                       | E203.11 | Anancastic neurosis                                      |
| 28 | E201600 | Other conversion disorder                                   | Eu46y12 | [X]Dhat syndrome                                         |
| 29 | E261100 | Psychogenic cough                                           | Eu45320 | [X]Psychogenic flatulence                                |
| 30 | E282.00 | Acute stupor state due to acute stress reaction             | E261200 | Psychogenic hiccough                                     |
| 31 |         |                                                             |         |                                                          |
| 32 | E203z00 | Obsessive-compulsive disorder NOS                           | E260000 | Psychogenic paralysis                                    |
| 33 | E292z00 | Adjustment reaction with disturbance of other emotion NOS   | E292y00 | Adjustment reaction with mixed disturbance of emotion    |
| 34 |         |                                                             |         |                                                          |
| 35 | E264500 | Psychogenic constipation                                    | Eu45z00 | [X]Somatoform disorder, unspecified                      |
| 36 | E263000 | Psychogenic pruritus                                        | Eu44z00 | [X]Dissociative [conversion] disorder, unspecified       |
| 37 |         |                                                             |         |                                                          |
| 38 | E202300 | Social phobia, fear of eating in public                     | Eu46z00 | [X]Neurotic disorder, unspecified                        |
| 39 | E293.00 | Adjustment reaction with predominant disturbance of conduct | E2y..00 | Other specified neuroses or other mental disorders       |
| 40 |         |                                                             |         |                                                          |
| 41 | E201500 | Hysterical seizures                                         | Eu44611 | [X]Psychogenic deafness                                  |
| 42 | Eu45324 | [X]Psychogenic IBS                                          | Eu41113 | [X]Anxiety state                                         |
| 43 | Eu46000 | [X]Neurasthenia                                             | Eu45314 | [X]Neurocirculatory asthenia                             |
| 44 | E202.11 | Social phobic disorders                                     | Eu44.12 | [X]Conversion reaction                                   |
| 45 | Eu45y13 | [X]Psychogenic pruritis                                     | Eu45319 | [X]Psychogenic dysuria                                   |
| 46 | Eu45318 | [X]Psychogenic dyspepsia                                    | E29y000 | Concentration camp syndrome                              |
| 47 | Eu40011 | [X]Agoraphobia without history of panic disorder            | Eu45321 | [X]Psychogenic hiccough                                  |
| 48 |         |                                                             |         |                                                          |
| 49 | Eu44y13 | [X]Psychogenic confusion                                    | E278000 | Psychogenic pain unspecified                             |
| 50 | Eu45323 | [X]Psychogenic freq micturit                                | E278z00 | Psychalgia NOS                                           |
| 51 | Eu51511 | [X]Dream anxiety disorder                                   | Eu45411 | [X]Psychalgia                                            |
| 52 | Eu93000 | [X]Separation anxiety disorder of childhood                 | E292200 | Early adult emancipation disorder                        |
| 53 | Eu45.00 | [X]Somatoform disorders                                     | E265300 | Psychogenic dysuria                                      |
| 54 | Eu40212 | [X]Animal phobias                                           | Eu44200 | [X]Dissociative stupor                                   |
| 55 |         |                                                             |         |                                                          |
| 56 |         |                                                             |         |                                                          |
| 57 |         |                                                             |         |                                                          |
| 58 |         |                                                             |         |                                                          |
| 59 |         |                                                             |         |                                                          |
| 60 |         |                                                             |         |                                                          |



|    |         |                                                              |         |                                                              |
|----|---------|--------------------------------------------------------------|---------|--------------------------------------------------------------|
| 1  | Eu42200 | [X]Mixed obsessional thoughts and acts                       | E260100 | Psychogenic torticollis                                      |
| 2  | E202500 | Social phobia, fear of public washing                        | E292400 | Adjustment reaction with anxious mood                        |
| 3  | Eu44412 | [X]Psychogenic dysphonia                                     | E20y011 | Briquet's disorder                                           |
| 4  | 225J.00 | O/E - panic attack                                           | Eu44500 | [X]Dissociative convulsions                                  |
| 5  | Eu45z11 | [X]Psychosomatic disorder NOS                                | Eu45100 | [X]Undifferentiated somatoform disorder                      |
| 6  | E29y500 | Other adjustment reaction with withdrawal                    | E292500 | Culture shock                                                |
| 7  | E261300 | Psychogenic hyperventilation                                 | Eu45012 | [X]Briquet's syndrome                                        |
| 8  | E265100 | Psychogenic vaginismus                                       | Eu93y12 | [X]Childhood overanxious disorder                            |
| 9  | E283000 | Acute situational disturbance                                | Eu46y14 | [X]Psychasthenia                                             |
| 10 | Eu42000 | [X]Predominantly obsessional thoughts or ruminations         | Eu45y00 | [X]Other somatoform disorders                                |
| 11 |         |                                                              |         |                                                              |
| 12 | Eu05400 | [X]Organic anxiety disorder                                  | E292300 | Specific academic or work inhibition                         |
| 13 | E28z.12 | Flying phobia                                                | E26y.00 | Other psychogenic malfunction                                |
| 14 | Eu45y12 | [X]Globus hystericus                                         | Z4I7100 | Recognising anxiety                                          |
| 15 | Eu46z11 | [X]Neurosis NOS                                              | Eu45313 | [X]Gastric neurosis                                          |
| 16 | Eu43014 | [X]Crisis state                                              | Eu44y00 | [X]Other dissociative [conversion] disorders                 |
| 17 | Eu43y00 | [X]Other reactions to severe stress                          | E293200 | Adjustment reaction with destructiveness                     |
| 18 | Eu42.12 | [X]Obsessive-compulsive neurosis                             | Eu45215 | [X]Nosophobia                                                |
| 19 | Eu42100 | [X]Predominantly compulsive acts [obsessional rituals]       | E292311 | Specific academic or work inhibition                         |
| 20 |         |                                                              |         |                                                              |
| 21 | Eu44.00 | [X]Dissociative [conversion] disorders                       | Eu40z12 | [X]Phobic state NOS                                          |
| 22 | Z4I7.00 | Acknowledging anxiety                                        | Eu40211 | [X]Acrophobia                                                |
| 23 | Eu42z00 | [X]Obsessive-compulsive disorder, unspecified                | Eu44y14 | [X]Psychogenic twilight state                                |
| 24 |         |                                                              |         |                                                              |
| 25 | E292100 | Adolescent emancipation disorder                             | E265.00 | Psychogenic genitourinary tract symptoms                     |
| 26 | E201z00 | Hysteria NOS                                                 | Eu43013 | [X]Combat fatigue                                            |
| 27 | E261400 | Psychogenic yawning                                          | E264z00 | Psychogenic gastrointestinal tract symptom NOS               |
| 28 |         |                                                              |         |                                                              |
| 29 | E29yz00 | Other adjustment reactions NOS                               | E20y300 | Psychasthenic neurosis                                       |
| 30 | E201A0  | Dissociative reaction unspecified                            | E265z00 | Psychogenic genitourinary tract symptom NOS                  |
| 31 | 0       |                                                              |         |                                                              |
| 32 | E201300 | Hysterical tremor                                            | Eu44700 | [X]Mixed dissociative [conversion] disorders                 |
| 33 | Eu45011 | [X]Multiple psychosomatic disorder                           | E267.00 | Psychogenic symptom of special sense organ                   |
| 34 | Eu4..00 | [X]Neurotic, stress - related and somoform disorders         | Eu46y15 | [X]Psychasthenia neurosis                                    |
| 35 |         |                                                              |         |                                                              |
| 36 | Eu41z00 | [X]Anxiety disorder, unspecified                             | Eu45325 | [X]Psychogenic pylorospasm                                   |
| 37 | E284.00 | Stress reaction causing mixed disturbance of emotion/conduct | 1B13.12 | Anxious                                                      |
| 38 |         |                                                              |         |                                                              |
| 39 | Eu41y00 | [X]Other specified anxiety disorders                         | E26yz00 | Other psychogenic malfunction NOS                            |
| 40 | E292.00 | Adjustment reaction, predominant disturbance other emotions  | Eu45511 | [X]Globus hystericus                                         |
| 41 |         |                                                              |         |                                                              |
| 42 | E293z00 | Adjustment reaction with predominant disturbance conduct NOS | Eu46y11 | [X]Briquet's disorder                                        |
| 43 | Eu45013 | [X]Briquet's disorder                                        | Eu43400 | [X]Chron post-traumatic stress disorder follow military comb |
| 44 |         |                                                              | Eu43300 | [X]Acute post-traumatic stress disorder follow military comb |
| 45 |         |                                                              |         |                                                              |
| 46 |         |                                                              |         |                                                              |
| 47 |         |                                                              |         |                                                              |
| 48 |         |                                                              |         |                                                              |
| 49 |         |                                                              |         |                                                              |
| 50 |         |                                                              |         |                                                              |
| 51 |         |                                                              |         |                                                              |
| 52 |         |                                                              |         |                                                              |
| 53 |         |                                                              |         |                                                              |
| 54 |         |                                                              |         |                                                              |
| 55 |         |                                                              |         |                                                              |
| 56 |         |                                                              |         |                                                              |
| 57 |         |                                                              |         |                                                              |
| 58 |         |                                                              |         |                                                              |
| 59 |         |                                                              |         |                                                              |
| 60 |         |                                                              |         |                                                              |

**MENTAL DISORDERS****At least one ICD-9 in:**

|     |                                                |
|-----|------------------------------------------------|
| 295 | Schizophrenic disorders                        |
| 296 | Episodic mood disorders (except 296.2 & 296.3) |
| 297 | Delusional disorders                           |
| 298 | Other nonorganic psychoses                     |
| 299 | Pervasive developmental disorders              |
| 301 | Personality disorders                          |

OR

**At least one ICD-10 in:**

|     |                                                                                  |
|-----|----------------------------------------------------------------------------------|
| F20 | Schizophrenia                                                                    |
| F21 | Schizotypal disorder                                                             |
| F22 | Delusional disorders                                                             |
| F23 | Brief psychotic disorder                                                         |
| F24 | Shared psychotic disorder                                                        |
| F25 | Schizoaffective disorders                                                        |
| F28 | Other psychotic disorder not due to a substance or known physiological condition |
| F29 | Unspecified psychosis not due to a substance or known physiological condition    |
| F30 | Manic episode                                                                    |
| F31 | Bipolar disorder                                                                 |
| F34 | Persistent mood [affective] disorders                                            |
| F39 | Unspecified mood [affective] disorder                                            |

OR

**At least one READ code in:**

|         |                                               |         |                                                              |
|---------|-----------------------------------------------|---------|--------------------------------------------------------------|
| E104.00 | Acute schizophrenic episode                   | Eu6y100 | [X]Intent product/feign of symptom/disab eith physical/psych |
| Eu2z.11 | [X]Psychosis NOS                              | Eu50400 | [X]Overeating associated with other psychological disturbncs |
| E21z.11 | Psychopathic personality                      | Eu60711 | [X]Asthenic personality disorder                             |
| E10..00 | Schizophrenic disorders                       | E04z.00 | Chronic organic psychosis NOS                                |
| E2F3z00 | Speech or language developmental disorder NOS | Eu34z00 | [X]Persistent mood affective disorder, unspecified           |
| E214100 | Obsessional personality                       | Eu6z.00 | [X]Unspecified disorder of adult personality and behaviour   |
| E21y500 | Immature personality disorder                 | Eu10600 | [X]Mental and behav dis due to use alcohol: amnesic syndrome |
| E103.00 | Paranoid schizophrenia                        | E214.11 | Anancastic personality                                       |
| Eu31.11 | [X]Manic-depressive illness                   | Eu60800 | [X]Addictive personality                                     |
| E2A1200 | Change in personality                         | Eu53000 | [X]Mild mental/behav disorder assoc with the puerperium NEC  |
| 1B1E.00 | Hallucinations                                | Eu21.15 | [X]Prodromal schizophrenia                                   |
| 1BH..00 | Delusions                                     | Eu53100 | [X]Severe mental and behav disorder assoc wth puerperium NEC |
| ZV40.13 | [V]Psychological problems                     | Eu22y11 | [X]Delusional dysmorphophobia                                |

|    |         |                                                                 |         |                                                                 |
|----|---------|-----------------------------------------------------------------|---------|-----------------------------------------------------------------|
| 1  | E21..00 | Personality disorders                                           | Eu25112 | [X]Schizophreniform psychosis, depressive type                  |
| 2  | Eu22011 | [X]Paranoid psychosis                                           | E141100 | Residual disintegrative psychoses                               |
| 3  | E03y300 | Unspecified puerperal psychosis                                 | Eu13.00 | [X]Mental and behavioural dis due use<br>sedatives/hypnotics    |
| 4  | E107.00 | Schizo-affective schizophrenia                                  | Eu05y00 | [X]Oth sp mental disord brain<br>damag/dysfunction/physcal disd |
| 5  |         |                                                                 | E11z.00 | Other and unspecified affective psychoses                       |
| 6  | R001.00 | [D]Hallucinations                                               | 1S04.00 | C/O - illusions seen                                            |
| 7  | E11..12 | Depressive psychoses                                            | E2z..00 | Neuroses or other mental disorder NOS                           |
| 8  | E21y711 | Neurotic personality                                            | Eu11000 | [X]Mental & behav dis due to use opioids: acute<br>intoxication |
| 9  | Eu30000 | [X]Hypomania                                                    | Eu60z00 | [X]Personality disorder, unspecified                            |
| 10 |         |                                                                 | Eu34.00 | [X]Persistent mood affective disorders                          |
| 11 | E00z.00 | Senile or presenile psychoses NOS                               | E110300 | Single manic episode, severe without mention of<br>psychosis    |
| 12 | Eu63300 | [X]Trichotillomania                                             | Eu15.00 | [X]Mental & behav disorder due other stimulants inc<br>caffein  |
| 13 | E212.00 | Schizoid personality disorder                                   | E14..00 | Psychoses with origin in childhood                              |
| 14 |         |                                                                 | Eu20100 | [X]Hebephrenic schizophrenia                                    |
| 15 | E11z100 | Rebound mood swings                                             | 1BH0.00 | Delusion of persecution                                         |
| 16 | E2F3.00 | Speech or language developmental disorder                       | Eu60400 | [X]Histrionic personality disorder                              |
| 17 | E...00  | Mental disorders                                                | E107200 | Chronic schizo-affective schizophrenia                          |
| 18 | E13z.11 | Psychotic episode NOS                                           | E215000 | Unspecified histrionic personality disorder                     |
| 19 | E114.00 | Bipolar affective disorder, currently manic                     | Eu10000 | [X]Mental & behav dis due to use alcohol: acute<br>intoxication |
| 20 | E215200 | Emotionally unstable personality                                | Eu23300 | [X]Other acute predominantly delusional psychotic<br>disorders  |
| 21 | E121.00 | Chronic paranoid psychosis                                      | Eu84z00 | [X]Pervasive developmental disorder, unspecified                |
| 22 | E100200 | Chronic schizophrenic                                           | Eu13200 | [X]Mental and behav dis due to seds/hypntcs:<br>dependence synd |
| 23 |         |                                                                 | Eu81y00 | [X]Other developmental disorders of scholastic skills           |
| 24 |         |                                                                 | E100400 | Acute exacerbation of chronic schizophrenia                     |
| 25 | E12..00 | Paranoid states                                                 | Eu23y00 | [X]Other acute and transient psychotic disorders                |
| 26 |         |                                                                 | Eu30z00 | [X]Manic episode, unspecified                                   |
| 27 | 285..11 | Psychotic condition, insight present                            | Eu8y.00 | [X]Other disorders of psychological development                 |
| 28 | E011000 | Korsakov's alcoholic psychosis                                  | Eu31600 | [X]Bipolar affective disorder, current episode mixed            |
| 29 |         |                                                                 | Eu60215 | [X]Sociopathic personality disorder                             |
| 30 | E216.00 | Inadequate personality disorder                                 | Eu19200 | [X]Mental and behav dis mlti/oth psych sbs:<br>dependence syndr |
| 31 | E115.00 | Bipolar affective disorder, currently depressed                 | ZV40z00 | [V]Unspecified mental or behavioural problem                    |
| 32 | Eu30z11 | [X]Mania NOS                                                    | Eu0z.00 | [X]Unspecified organic or symptomatic mental<br>disorder        |
| 33 | Eu31500 | [X]Bipolar affect dis cur epi severe depres with<br>psyc symp   | Eu80y00 | [X]Other developmental disorders of speech and<br>language      |
| 34 |         |                                                                 | E111z00 | Recurrent manic episode NOS                                     |
| 35 | E215.11 | Hysterical personality disorders                                | E111100 | Recurrent manic episodes, mild                                  |
| 36 | Eu22015 | [X]Paranoia                                                     | E114200 | Bipolar affective disorder, currently manic, moderate           |
| 37 | Eu10.00 | [X]Mental and behavioural disorders due to<br>use of alcohol    | Eu6y200 | [X]Munchausen's by proxy                                        |
| 38 | E210.00 | Paranoid personality disorder                                   |         |                                                                 |
| 39 |         |                                                                 | L184.00 | Mental disorders in pregnancy, childbirth and the<br>puerperium |
| 40 | Eu3..00 | [X]Mood - affective disorders                                   | Eu33300 | [X]Recurrent depress disorder cur epi severe with psyc<br>symp  |
| 41 | 146..00 | H/O: psychiatric disorder                                       | Eu24.12 | [X] Induced paranoid disorder                                   |
| 42 |         |                                                                 | Eu11.00 | [X]Mental and behavioural disorders due to use of<br>opioids    |
| 43 | Eu80.00 | [X]Specific developmental disorders of speech<br>and language   | Eu02z12 | [X] Presenile psychosis NOS                                     |
| 44 | 1464.00 | H/O: schizophrenia                                              | Eu14100 | [X]Mental and behav dis due to use of cocaine:                  |
| 45 | E213.11 | Aggressive personality                                          |         |                                                                 |
| 46 | Eu83.00 | [X]Mixed specific developmental disorders                       |         |                                                                 |
| 47 | Eu80z00 | [X]Developmental disorder of speech and<br>language unspecified |         |                                                                 |
| 48 | Eu81z00 | [X]Developmental disorder of scholastic skills,<br>unspecified  |         |                                                                 |
| 49 | Eu05y11 | [X]Epileptic psychosis NOS                                      |         |                                                                 |
| 50 |         |                                                                 |         |                                                                 |
| 51 | Eu31.12 | [X]Manic-depressive psychosis                                   |         |                                                                 |
| 52 | Eu31.00 | [X]Bipolar affective disorder                                   |         |                                                                 |
| 53 |         |                                                                 |         |                                                                 |
| 54 | Eu84.00 | [X]Pervasive developmental disorders                            |         |                                                                 |
| 55 | Eu...00 | Organic psychotic conditions                                    |         |                                                                 |

|    |         |                                                              |         |                                                              |
|----|---------|--------------------------------------------------------------|---------|--------------------------------------------------------------|
| 1  | Eu82.00 | [X]Specific developmental disorder of motor function         | Eu22013 | harmful use<br>[X]Paraphrenia - late                         |
| 2  |         |                                                              |         |                                                              |
| 3  | E132.00 | Reactive confusion                                           | Eu84y00 | [X]Other pervasive developmental disorders                   |
| 4  | Eu60300 | [X]Emotionally unstable personality disorder                 | E101z00 | Hebephrenic schizophrenia NOS                                |
| 5  | E10z.00 | Schizophrenia NOS                                            | Eu62000 | [X]Enduring personality change after catastrophic experience |
| 6  |         |                                                              |         |                                                              |
| 7  | Eu60600 | [X]Anxious [avoidant] personality disorder                   | 1S40.00 | Dysphoric mood                                               |
| 8  | E130.00 | Reactive depressive psychosis                                | Eu06013 | [X]Limbic epilepsy personality                               |
| 9  | E11..11 | Bipolar psychoses                                            | Eu30212 | [X]Mania with mood-incongruent psychotic symptoms            |
| 10 | Eu0z.12 | [X]Symptomatic psychosis NOS                                 | Eu60014 | [X]Sensitive paranoid personality disorder                   |
| 11 | E103z00 | Paranoid schizophrenia NOS                                   | E216.11 | Asthenic personality                                         |
| 12 | Eu25.00 | [X]Schizoaffective disorders                                 | Eu66z00 | [X]Psychosexual development disorder, unspecified            |
| 13 | Eu30.11 | [X]Bipolar disorder, single manic episode                    | Eu22z00 | [X]Persistent delusional disorder, unspecified               |
| 14 | E2...00 | Neurotic, personality and other nonpsychotic disorders       | Eu20y00 | [X]Other schizophrenia                                       |
| 15 |         |                                                              |         |                                                              |
| 16 | Eu...00 | [X]Mental and behavioural disorders                          | E2A..00 | Nonpsychotic mental disorders following organic brain damage |
| 17 |         |                                                              |         |                                                              |
| 18 | Eu34112 | [X]Depressive personality disorder                           | Eu14500 | [X]Mental & behav dis due to use cocaine: psychotic disorder |
| 19 |         |                                                              |         |                                                              |
| 20 | E211200 | Depressive personality disorder                              | Eu14000 | [X]Mental & behav dis due to use cocaine: acute intoxication |
| 21 |         |                                                              |         |                                                              |
| 22 | E03y000 | Organic delusional syndrome                                  | Eu60y00 | [X]Other specific personality disorders                      |
| 23 | E107z00 | Schizo-affective schizophrenia NOS                           | Eu60z12 | [X]Pathological personality NOS                              |
| 24 | Eu12.00 | [X]Mental and behavioural disorders due to use cannabinoids  | E10yz00 | Other schizophrenia NOS                                      |
| 25 |         |                                                              |         |                                                              |
| 26 | Eu19.00 | [X]Men & behav disorder multiple drug use/psychoactive subst | E117000 | Unspecified bipolar affective disorder, unspecified          |
| 27 |         |                                                              |         |                                                              |
| 28 | Ez...00 | Mental disorders NOS                                         | Eu60y13 | [X]Immature personality disorder                             |
| 29 | Eu25100 | [X]Schizoaffective disorder, depressive type                 | Eu21.16 | [X]Pseudoneurotic schizophrenia                              |
| 30 | E011100 | Korsakov's alcoholic psychosis with peripheral neuritis      | Eu15500 | [X]Mental/behav dis oth stims inc caffeine: psychotic dis    |
| 31 |         |                                                              |         |                                                              |
| 32 | Eu22012 | [X]Paranoid state                                            | Eu23011 | [X]Bouffee delirante                                         |
| 33 | Eu2z.00 | [X]Unspecified nonorganic psychosis                          | Eu20011 | [X]Paraphrenic schizophrenia                                 |
| 34 | 146D.00 | H/O: manic depressive disorder                               | Eu05z00 | [X]Unspec mental disorder brain damag/dysfunction/physcal dr |
| 35 |         |                                                              |         |                                                              |
| 36 | E11y000 | Unspecified manic-depressive psychoses                       | E2y..00 | Other specified neuroses or other mental disorders           |
| 37 | Eu10611 | [X]Korsakov's psychosis, alcohol induced                     | Eu18000 | [X]Mental & behav dis due vol solvents: acute intoxication   |
| 38 |         |                                                              |         |                                                              |
| 39 | Eu23200 | [X]Acute schizophrenia-like psychotic disorder               | Eu60.00 | [X]Specific personality disorders                            |
| 40 | Eu24.13 | [X]Induced psychotic disorder                                | E110400 | Single manic episode, severe, with psychosis                 |
| 41 | R001400 | [D]Visual hallucinations                                     | Eu34y00 | [X]Other persistent mood affective disorders                 |
| 42 | Eu32300 | [X]Severe depressive episode with psychotic symptoms         | Eu22y12 | [X]Involuntal paranoid state                                 |
| 43 |         |                                                              |         |                                                              |
| 44 | R001000 | [D]Hallucinations, auditory                                  | Eu16.00 | [X]Mental and behavioural disorders due to use hallucinogens |
| 45 |         |                                                              |         |                                                              |
| 46 | Eu30.00 | [X]Manic episode                                             | Eu14200 | [X]Mental and behav dis due to use cocaine: dependence syndr |
| 47 |         |                                                              |         |                                                              |
| 48 | E211100 | Hypomanic personality disorder                               | Eu52800 | [X]Erotomania                                                |
| 49 | Eu10500 | [X]Mental & behav dis due to use alcohol: psychotic disorder | Eu12100 | [X]Mental and behav dis due to use cannabinoids: harmful use |
| 50 |         |                                                              |         |                                                              |
| 51 | 225E.00 | O/E - paranoid delusions                                     | Eu60y16 | [X]Psychoneurotic personality disorder                       |
| 52 | Eu45211 | [X]Body dysmorphic disorder                                  | E123.11 | Folie a deux                                                 |
| 53 | E211300 | Cyclothymic personality disorder                             | Eu11500 | [X]Mental & behav dis due to use opioids: psychotic disorder |
| 54 |         |                                                              |         |                                                              |
| 55 | E12z.00 | Paranoid psychosis NOS                                       | Eu3y000 | [X]Other single mood affective disorders                     |
| 56 | 146H.00 | H/O: psychosis                                               | Eu31y12 | [X]Recurrent manic episodes                                  |
| 57 | E115.11 | Manic-depressive - now depressed                             | E02y.00 | Other drug psychoses                                         |
| 58 | Eu30100 | [X]Mania without psychotic symptoms                          | Eu19300 | [X]Mental and behav dis mlti/oth psychoa sbs:                |
| 59 |         |                                                              |         |                                                              |

|    |         |                                                              |  |         |                                                              |
|----|---------|--------------------------------------------------------------|--|---------|--------------------------------------------------------------|
| 1  | E11..00 | Affective psychoses                                          |  |         | withdrwl state                                               |
| 2  | E110100 | Single manic episode, mild                                   |  | Eu24.00 | [X]Induced delusional disorder                               |
| 3  |         |                                                              |  | E103300 | Acute exacerbation of subchronic paranoid schizophrenia      |
| 4  | E120.00 | Simple paranoid state                                        |  | Eu84511 | [X]Autistic psychopathy                                      |
| 5  | E212z00 | Schizoid personality disorder NOS                            |  | E00y.11 | Presbyophrenic psychosis                                     |
| 6  | E117.00 | Unspecified bipolar affective disorder                       |  | E211z00 | Affective personality disorder NOS                           |
| 7  | E13z.00 | Nonorganic psychosis NOS                                     |  | Eu25012 | [X]Schizophreniform psychosis, manic type                    |
| 8  | E122.00 | Paraphrenia                                                  |  | Eu60500 | [X]Anankastic personality disorder                           |
| 9  | E211.00 | Affective personality disorder                               |  | 225F.00 | O/E - delusion of persecution                                |
| 10 | E133.00 | Acute paranoid reaction                                      |  | Eu32312 | [X]Single episode of psychogenic depressive psychosis        |
| 11 | F481K00 | Visual hallucinations                                        |  | Eu18200 | [X]Mental and behav dis due to vol solvents: dependence synd |
| 12 |         |                                                              |  | E14z.00 | Child psychosis NOS                                          |
| 13 | E21z.00 | Personality disorder NOS                                     |  | Eu06y00 | [X]Oth organ personality behav disorders brain dis dam dysf  |
| 14 | E00y.00 | Other senile and presenile organic psychoses                 |  | E22y500 | Nymphomania                                                  |
| 15 |         |                                                              |  | E103400 | Acute exacerbation of chronic paranoid schizophrenia         |
| 16 | E100000 | Unspecified schizophrenia                                    |  | Eu60y14 | [X]Narcissistic personality disorder                         |
| 17 | E115000 | Bipolar affective disorder, currently depressed, unspecified |  | Eu62013 | [X]Personality change aft prolong captiv+possib/being killed |
| 18 | E1...00 | Non-organic psychoses                                        |  | E100z00 | Simple schizophrenia NOS                                     |
| 19 | E21yz00 | Other personality disorder NOS                               |  | Ryu5300 | [X]Other hallucinations                                      |
| 20 |         |                                                              |  | Eu31y00 | [X]Other bipolar affective disorders                         |
| 21 | E211000 | Unspecified affective personality disorder                   |  | Eu84314 | [X]Symbiotic psychosis                                       |
| 22 | E01..00 | Alcoholic psychoses                                          |  | Eu20111 | [X]Disorganised schizophrenia                                |
| 23 | E02..00 | Drug psychoses                                               |  | R001100 | [D]Hallucinations, gustatory                                 |
| 24 | E13y.00 | Other reactive psychoses                                     |  | E116400 | Mixed bipolar affective disorder, severe, with psychosis     |
| 25 | E13y.00 | Other reactive psychoses                                     |  | Eu21.12 | [X]Borderline schizophrenia                                  |
| 26 | E114300 | Bipolar affect disord, currently manic, severe, no psychosis |  | E11z000 | Unspecified affective psychoses NOS                          |
| 27 | E1y..00 | Other specified non-organic psychoses                        |  | Eu34012 | [X]Cycloid personality                                       |
| 28 |         |                                                              |  | Eu16500 | [X]Mental & behav dis due to hallucinogens: psychotic disord |
| 29 | Eu31300 | [X]Bipolar affect disorder cur epi mild or moderate depressn |  | E116600 | Mixed bipolar affective disorder, in full remission          |
| 30 | Eu20000 | [X]Paranoid schizophrenia                                    |  | E03..00 | Transient organic psychoses                                  |
| 31 | Eu31000 | [X]Bipolar affective disorder, current episode hypomanic     |  | Eu22111 | [X]Capgras syndrome                                          |
| 32 | Eu33315 | [X]Recurrent severe episodes of psychotic depression         |  | Eu22y13 | [X]Paranoia querulans                                        |
| 33 | Eu25011 | [X]Schizoaffective psychosis, manic type                     |  | 1BH2.00 | Ideas of reference                                           |
| 34 | Eu2..00 | [X]Schizophrenia, schizotypal and delusional disorders       |  | ZV40y00 | [V]Other specified mental or behavioural problem             |
| 35 | E114.11 | Manic-depressive - now manic                                 |  | E114400 | Bipolar affect disord, currently manic,severe with psychosis |
| 36 | Eu60513 | [X]Obsessive-compulsive personality disorder                 |  | Eu60y11 | [X]Eccentric personality disorder                            |
| 37 | Eu10514 | [X]Alcoholic psychosis NOS                                   |  | E141.00 | Disintegrative psychosis                                     |
| 38 | Eu53111 | [X]Puerperal psychosis NOS                                   |  | Eu17100 | [X]Mental and behav dis due to use of tobacco: harmful use   |
| 39 | E130.11 | Psychotic reactive depression                                |  | Eu16300 | [X]Mental and behav dis due hallucinogens: withdrawal state  |
| 40 | 1BH..11 | Delusion                                                     |  | Eu62.00 | [X]Enduring personality change not attrib to brain damag/dis |
| 41 | Eu20y13 | [X]Schizophrenifrm psychos NOS                               |  | E107500 | Schizo-affective schizophrenia in remission                  |
| 42 | E21y200 | Borderline personality disorder                              |  | Eu60213 | [X]Asocial personality disorder                              |
| 43 |         |                                                              |  | Eu12200 | [X]Mental and behav dis due to cannabinoids: dependence synd |
| 44 | E110.11 | Hypomanic psychoses                                          |  |         |                                                              |
| 45 | 212T.00 | Psychosis, schizophrenia + bipolar affective disord resolved |  |         |                                                              |
| 46 | 1B1b.00 | Transient hallucinations                                     |  |         |                                                              |
| 47 | R001z00 | [D]Hallucinations NOS                                        |  |         |                                                              |
| 48 | E215100 | Munchausen's syndrome                                        |  |         |                                                              |

|    |         |                                                              |         |                                                              |
|----|---------|--------------------------------------------------------------|---------|--------------------------------------------------------------|
| 1  | E216.13 | Labile personality                                           | Eu19700 | [X]Men/beh dis mlt drg use/oth subs: resid/late psychot dis  |
| 2  | E111000 | Recurrent manic episodes, unspecified                        | Eu8z.00 | [X]Unspecified disorder of psychological development         |
| 3  | E2C3200 | Kleptomania                                                  | Z57C611 | Schizophrenic language                                       |
| 4  | E21yz11 | Manipulative personality                                     | Eu62011 | [X]Personality change after concentration camp experiences   |
| 5  |         |                                                              | E115600 | Bipolar affective disorder, now depressed, in full remission |
| 6  | E110000 | Single manic episode, unspecified                            | Eu12700 | [X]Mnt/bh dis due cannabinds: resid & late-onset psychot dis |
| 7  |         |                                                              | E114z00 | Bipolar affective disorder, currently manic, NOS             |
| 8  | E13..11 | Reactive psychoses                                           | E03z.00 | Transient organic psychoses NOS                              |
| 9  |         |                                                              | E100300 | Acute exacerbation of subchronic schizophrenia               |
| 10 | E2C3300 | Pyromania                                                    | Eu03.11 | [X]Korsakov's psychosis, nonalcoholic                        |
| 11 | Eu10300 | [X]Mental and behav dis due to use alcohol: withdrawal state | Eu25y00 | [X]Other schizoaffective disorders                           |
| 12 | Eu20211 | [X]Catatonic stupor                                          | E100500 | Schizophrenia in remission                                   |
| 13 | Eu20400 | [X]Post-schizophrenic depression                             | Eu60313 | [X]Explosive personality disorder                            |
| 14 | Eu60311 | [X]Aggressive personality disorder                           | E102000 | Unspecified catatonic schizophrenia                          |
| 15 | E214.00 | Compulsive personality disorders                             | E107000 | Unspecified schizo-affective schizophrenia                   |
| 16 | Eu6..00 | [X]Disorders of adult personality and behaviour              | E111500 | Recurrent manic episodes, partial or unspecified remission   |
| 17 | Eu30200 | [X]Mania with psychotic symptoms                             | E107300 | Acute exacerbation subchronic schizo-affective schizophrenia |
| 18 | E21y700 | Psychoneurotic personality disorder                          | Eu60714 | [X]Self defeating personality disorder                       |
| 19 | Eu81.00 | [X]Specific developmental disorders of scholastic skills     | Eu18100 | [X]Mental and behav dis due volatile solvents: harmful use   |
| 20 | Eu60000 | [X]Paranoid personality disorder                             | E114500 | Bipolar affect disord,currently manic, part/unspec remission |
| 21 |         |                                                              | Eu23211 | [X]Brief schizophreniform disorder                           |
| 22 | Eu23012 | [X]Cycloid psychosis                                         | Eu15700 | [X]Mnt/bh dis oth stm inc caffne resid/late-onset psycht dis |
| 23 | Eu34000 | [X]Cyclothymia                                               | E03yz00 | Other transient organic psychoses NOS                        |
| 24 | Eu23100 | [X]Acute polymorphic psychot disord with symp of schizophren | Eu84512 | [X]Schizoid disorder of childhood                            |
| 25 | E216.12 | Dependent personality                                        | Eu06000 | [X]Organic personality disorder                              |
| 26 | Eu60214 | [X]Psychopathic personality disorder                         | Eu20300 | [X]Undifferentiated schizophrenia                            |
| 27 | Eu10100 | [X]Mental and behav dis due to use of alcohol: harmful use   | E11y.00 | Other and unspecified manic-depressive psychoses             |
| 28 | Eu0z.11 | [X]Organic psychosis NOS                                     | E2Az.00 | Nonpsychotic mental disorder post-organic brain damage NOS   |
| 29 | Eu05200 | [X]Organic delusional [schizophrenia-like] disorder          | E215z00 | Histrionic personality disorder NOS                          |
| 30 | Eu04.15 | [X]Acute / subacute psycho-organic reaction                  | Eu19000 | [X]Mental/behav dis multi drg use/psychoac subs: acute intox |
| 31 | ZV11112 | [V]Personal history of manic-depressive psychosis            | E107100 | Subchronic schizo-affective schizophrenia                    |
| 32 | E02y400 | Drug-induced personality disorder                            | Eu84013 | [X]Infantile psychosis                                       |
| 33 | ZV11000 | [V]Personal history of schizophrenia                         | Eu13300 | [X]Mental and behav dis due sed/s/hypntcs: withdrawal state  |
| 34 | E13y000 | Psychogenic stupor                                           | Eu20200 | [X]Catatonic schizophrenia                                   |
| 35 | E1z..00 | Non-organic psychosis NOS                                    | Eu17.00 | [X]Mental and behavioural disorder due to use of tobacco     |
| 36 | Eu60512 | [X]Obsessional personality disorder                          | E212200 | Schizotypal personality                                      |
| 37 | Euz..11 | [X]Mental illness NOS                                        | Eu10700 | [X]Men & behav dis due alcoh: resid & late-onset psychot dis |
| 38 | 1BH3.00 | Paranoid ideation                                            | E04..00 | Other chronic organic psychoses                              |
| 39 | 286..11 | Poor insight into psychotic condition                        | Eu84312 | [X]Disintegrative psychosis                                  |
| 40 | 1S42.00 | Manic mood                                                   | Eu22100 | [X]Delusional misidentification syndrome                     |
| 41 | Eu0..00 | [X]Organic, including symptomatic, mental disorders          | Eu21.14 | [X]Prepsychotic schizophrenia                                |
| 42 | E13y100 | Brief reactive psychosis                                     |         |                                                              |
| 43 | E213.00 | Explosive personality disorder                               |         |                                                              |
| 44 | E100100 | Subchronic schizophrenia                                     |         |                                                              |
| 45 | Eu53z00 | [X]Puerperal mental disorder, unspecified                    |         |                                                              |

|         |                                                                 |         |                                                                 |
|---------|-----------------------------------------------------------------|---------|-----------------------------------------------------------------|
| E04y.00 | Other specified chronic organic psychoses                       | E123.00 | Shared paranoid disorder                                        |
| Eu06.00 | [X]Personality and behav disorder brain dis<br>dam and dysfunct | E2Ay.00 | Other specific mental disorder post-organic brain<br>damage     |
| Eu31400 | [X]Bipol aff disord, curr epis sev depress, no<br>psychot symp  | Eu19100 | [X]Mental and behav dis mlti drg/oth psychoa sbs:<br>harmfl use |
| Eu33311 | [X]Endogenous depression with psychotic<br>symptoms             | E116200 | Mixed bipolar affective disorder, moderate                      |
| E040.11 | Korsakoff's non-alcoholic psychosis                             | E116300 | Mixed bipolar affective disorder, severe, without<br>psychosis  |
| Eu34013 | [X]Cyclothymic personality                                      | E107400 | Acute exacerbation of chronic schizo-affective<br>schizophrenia |
| ZV11111 | [V]Personal history of manic-depressive<br>psychosis            | E116z00 | Mixed bipolar affective disorder, NOS                           |
| E217.00 | Antisocial or sociopathic personality disorder                  | E116500 | Mixed bipolar affective disorder, partial/unspec<br>remission   |
| Eu05300 | [X]Organic mood [affective] disorders                           | E117100 | Unspecified bipolar affective disorder, mild                    |
| Eu84111 | [X]Atypical childhood psychosis                                 | E115400 | Bipolar affect disord, now depressed, severe with<br>psychosis  |
| Eu20511 | [X]Chronic undifferentiated schizophrenia                       | E114600 | Bipolar affective disorder, currently manic, full<br>remission  |
| Eu32313 | [X]Single episode of psychotic depression                       | ZV40200 | [V]Other mental problems                                        |
| Eu32311 | [X]Single episode of major depression and<br>psychotic symptoms | E2A1z00 | Organic personality syndrome NOS                                |
| E113400 | Recurrent major depressive episodes, severe,<br>with psychosis  | E102z00 | Catatonic schizophrenia NOS                                     |
| E117600 | Unspecified bipolar affective disorder, in full<br>remission    | Eu06z00 | [X]Unspec organ personality behav disorder brain dam<br>dysfunc |
| E14y000 | Atypical childhood psychoses                                    | R001300 | [D]Hallucinations, tactile                                      |
| E134.00 | Psychogenic paranoid psychosis                                  | Eu13000 | [X]Mental & behav dis due seds/hypntcs: acute<br>intoxication   |
| Eu04.13 | [X]Acute / subacute infective psychosis                         | Eu20500 | [X]Residual schizophrenia                                       |
| 146Z.00 | H/O: psychiatric disorder NOS                                   | Eu20212 | [X]Schizophrenic catalepsy                                      |
| Eu19500 | [X]Ment/behav dis mlti drug use/oth psyc sbs:<br>psychotc dis   | Eu6y.00 | [X]Other disorders of adult personality and behaviour           |
| E110200 | Single manic episode, moderate                                  | Eu21.13 | [X]Latent schizophrenia                                         |
| E116100 | Mixed bipolar affective disorder, mild                          | Eu22014 | [X]Sensitiver Beziehungswahn                                    |
| Eu53.00 | [X]Mental and behav disorders assoc with the<br>puerperium NEC  | Eu12300 | [X]Mental and behav dis due cannabinoids:<br>withdrawal state   |
| Eu23.00 | [X]Acute and transient psychotic disorders                      | Eu62012 | [X]Personality change after disasters                           |
| Eu04.00 | [X]Delirium, not induced by alcohol+other<br>psychoactive subs  | E111300 | Recurrent manic episodes, severe without mention<br>psychosis   |
| E2A1.00 | Organic personality syndrome                                    | Eu16200 | [X]Mental and behav dis due to hallucinogens:<br>dependence syn |
| ZV40.00 | [V]Mental and behavioural problems                              | Eu22y00 | [X]Other persistent delusional disorders                        |
| E21y.00 | Other personality disorders                                     | Eu31.13 | [X]Manic-depressive reaction                                    |
| Eu8..00 | [X]Disorders of psychological development                       | Eu16000 | [X]Mental & behav dis due hallucinogens: acute<br>intoxicatn    |
| R001200 | [D]Hallucinations, olfactory                                    | E105.00 | Latent schizophrenia                                            |
| E102.00 | Catatonic schizophrenia                                         | E101000 | Unspecified hebephrenic schizophrenia                           |
| Eu54.00 | [X]Psychological/behav factor assoc with<br>disorder or dis EC  | E0y..00 | Other specified organic psychoses                               |
| E02z.00 | Drug psychosis NOS                                              | E14yz00 | Other childhood psychoses NOS                                   |
| E13yz00 | Other reactive psychoses NOS                                    | E12y000 | Paranoia querulans                                              |
| Eu23112 | [X]Cycloid psychosis with symptoms of<br>schizophrenia          | E212000 | Unspecified schizoid personality disorder                       |
| E11..13 | Manic psychoses                                                 | Eu16100 | [X]Mental and behav dis due to use hallucinogens:<br>harmfl use |
| E111.00 | Recurrent manic episodes                                        | Eu14300 | [X]Mental and behav dis due to use cocaine:<br>withdrawal state |

|    |         |                                                              |         |                                                              |
|----|---------|--------------------------------------------------------------|---------|--------------------------------------------------------------|
| 1  | Eu31100 | [X]Bipolar affect disorder cur epi manic wout psychotic symp | E215300 | Psychoinfantile personality                                  |
| 2  | Eu34011 | [X]Affective personality disorder                            | E01z.00 | Alcoholic psychosis NOS                                      |
| 3  | Eu21.18 | [X]Schizotypal personality disorder                          | E101500 | Hebephrenic schizophrenia in remission                       |
| 4  | E215.00 | Histrionic personality disorders                             | E217.11 | Amoral personality                                           |
| 5  | Eu31700 | [X]Bipolar affective disorder, currently in remission        | E133.11 | Bouffe delirante                                             |
| 6  |         |                                                              |         |                                                              |
| 7  | Eu11700 | [X]Men & beh dis due opioids: resid & late-onset psychot dis | E01yz00 | Other alcoholic psychosis NOS                                |
| 8  |         |                                                              |         |                                                              |
| 9  | Eu66.00 | [X]Psychol and behav disorder assoc with sex dev and orienta | E03y.00 | Other transient organic psychoses                            |
| 10 |         |                                                              |         |                                                              |
| 11 | Ey...00 | Other specified mental disorders                             | E117400 | Unspecified bipolar affective disorder,severe with psychosis |
| 12 |         |                                                              |         |                                                              |
| 13 | E111200 | Recurrent manic episodes, moderate                           | E117200 | Unspecified bipolar affective disorder, moderate             |
| 14 | Eu02z16 | [X] Senile dementia, depressed or paranoid type              | Eu60013 | [X]Querulant personality disorder                            |
| 15 |         |                                                              |         |                                                              |
| 16 | Eu23312 | [X]Psychogenic paranoid psychosis                            | Eu13500 | [X]Mental & behav dis due to seds/hypntcs: psychotic disordr |
| 17 |         |                                                              |         |                                                              |
| 18 | E21y400 | Eccentric personality disorder                               | E14y100 | Borderline psychosis of childhood                            |
| 19 | E115200 | Bipolar affective disorder, currently depressed, moderate    | Eu60412 | [X]Psychoinfantile personality disorder                      |
| 20 |         |                                                              |         |                                                              |
| 21 | Eu02z15 | [X] Senile psychosis NOS                                     | E110600 | Single manic episode in full remission                       |
| 22 | Eu60411 | [X]Hysterical personality disorder                           | E11y300 | Other mixed manic-depressive psychoses                       |
| 23 | Eu05.00 | [X]Oth mental disorder brain damag/dysfunction/physical disr | E117500 | Unspecified bipolar affect disord, partial/unspec remission  |
| 24 |         |                                                              |         |                                                              |
| 25 | E117z00 | Unspecified bipolar affective disorder, NOS                  | Eu23212 | [X]Brief schizophrenifrm psych                               |
| 26 | Eu3y.00 | [X]Other mood affective disorders                            | E21y600 | Masochistic personality disorder                             |
| 27 | Eu44.14 | [X]Hysterical psychosis                                      | E11y100 | Atypical manic disorder                                      |
| 28 | E21..11 | Neurotic personality disorder                                | Eu21.17 | [X]Pseudopsychopathic schizophrenia                          |
| 29 | Eu31200 | [X]Bipolar affect disorder cur epi manic with psychotic symp | Eu60y12 | [X]Haltlose type personality disorder                        |
| 30 |         |                                                              |         |                                                              |
| 31 | Eu22.00 | [X]Persistent delusional disorders                           | E14y.00 | Other childhood psychoses                                    |
| 32 | Eu33312 | [X]Manic-depress psychosis,depressed type+psychotic symptoms | E115500 | Bipolar affect disord, now depressed, part/unspec remission  |
| 33 |         |                                                              |         |                                                              |
| 34 | E02yz00 | Other drug psychoses NOS                                     | E100.11 | Schizophrenia simplex                                        |
| 35 | Eu32314 | [X]Single episode of reactive depressive psychosis           | E117300 | Unspecified bipolar affective disorder, severe, no psychosis |
| 36 |         |                                                              |         |                                                              |
| 37 | Eu33213 | [X]Manic-depress psychosis,depressd,no psychotic symptoms    | ZVu6K00 | [X]Personal history/other mental and behavioural disorders   |
| 38 |         |                                                              |         |                                                              |
| 39 | Eu3yy00 | [X]Other specified mood affective disorders                  | Eu31y11 | [X]Bipolar II disorder                                       |
| 40 | Eu23z12 | [X]Reactive psychosis                                        | ZV11z00 | [V]Personal history of unspecified mental disorder           |
| 41 | Eu3y100 | [X]Other recurrent mood affective disorders                  | 212V.00 | Bipolar affective disorder resolved                          |
| 42 | E131.00 | Acute hysterical psychosis                                   | 1B1e.00 | Hypnopompic hallucination                                    |
| 43 | Eu1..00 | [X]Mental and behavioural disorders due to psychoactive subs | 212X.00 | Psychosis resolved                                           |
| 44 |         |                                                              |         |                                                              |
| 45 | ZV11.00 | [V]Personal history of mental disorder                       | Eu1A100 | [X]Mental behav disorders due use crack cocaine: harmful use |
| 46 |         |                                                              |         |                                                              |
| 47 | ZRby100 | Profile of mood states, bipolar                              | 1B1d.00 | Hypnagogic hallucination                                     |
| 48 | E214000 | Anankastic personality                                       | Eu62z00 | [X]Enduring personality change, unspecified                  |
| 49 | Eu66y00 | [X]Other psychosexual development disorders                  | 212W.00 | Schizophrenia resolved                                       |
| 50 | Eu61.00 | [X]Mixed and other personality disorders                     | Eu21.11 | [X]Latent schizophrenic reaction                             |
| 51 | E101.00 | Hebephrenic schizophrenia                                    | Eu20311 | [X]Atypical schizophrenia                                    |
| 52 | Eu3y011 | [X]Mixed affective episode                                   | E10y.11 | Cenesthopathic schizophrenia                                 |
| 53 | Eu2y.00 | [X]Other nonorganic psychotic disorders                      | Eu13100 | [X]Mental and behav dis due to use seds/hypntcs: harmful use |
| 54 |         |                                                              |         |                                                              |
| 55 | ZV71000 | [V]Observation for mental disorder                           | ZV11y00 | [V]Personal history of other specified mental disorder       |
| 56 | Eu6y111 | [X] Munchausens syndrome                                     | Eu06011 | [X]Organic pseudopsychopathic personality                    |
| 57 | E116.00 | Mixed bipolar affective disorder                             | Eu20y12 | [X]Schizophreniform disord NOS                               |
| 58 |         |                                                              |         |                                                              |
| 59 |         |                                                              |         |                                                              |
| 60 |         |                                                              |         |                                                              |



|    |         |                                                                 |         |                                                                 |
|----|---------|-----------------------------------------------------------------|---------|-----------------------------------------------------------------|
| 1  | E103200 | Chronic paranoid schizophrenia                                  | E105200 | Chronic latent schizophrenia                                    |
| 2  | E12yz00 | Other paranoid states NOS                                       | Eu23214 | [X]Schizophrenic reaction                                       |
| 3  | Eu20214 | [X]Schizophrenic flexibilatis cerea                             | E105500 | Latent schizophrenia in remission                               |
| 4  | E116000 | Mixed bipolar affective disorder, unspecified                   | Eu12600 | [X]Mental and behav dis due to use cannabinoids:<br>amnesic syn |
| 5  | E12y.00 | Other paranoid states                                           | Eu05z12 | [X]Organic mental disorder NOS                                  |
| 6  | Eu60200 | [X]Dissocial personality disorder                               | E101400 | Acute exacerbation of chronic hebephrenic<br>schizophrenia      |
| 7  |         |                                                                 | Eu32800 | [X]Major depression, severe with psychotic symptoms             |
| 8  | Eu3z.11 | [X]Affective psychosis NOS                                      | Eu18500 | [X]Mental & behav dis due to vol solvents: psychotic<br>disordr |
| 9  | ZV40.12 | [V]Mental problems                                              | Eu22200 | [X]Cotard syndrome                                              |
| 10 |         |                                                                 | E107.11 | Cyclic schizophrenia                                            |
| 11 | Eu23z11 | [X]Brief reactive psychosis NOS                                 | E10y100 | Coenesthopathic schizophrenia                                   |
| 12 | Eu18.00 | [X]Mental & behav disorders due to use of<br>volatile solvents  | E102100 | Subchronic catatonic schizophrenia                              |
| 13 | Eu2y.11 | [X]Chronic hallucinatory psychosis                              | Eu94211 | [X]Affectionless psychopathy                                    |
| 14 | Eu33314 | [X]Recurr severe episodes/psychogenic<br>depressive psychosis   | Eu3y200 | [X]Premenstrual dysphoric disorder                              |
| 15 | Eu60312 | [X]Borderline personality disorder                              | 14g..00 | History of developmental disorder                               |
| 16 | Eu62015 | [X]Personality change after torture                             | L184400 | Mental disorder in puerperium - baby previously<br>delivered    |
| 17 | Eu60700 | [X]Dependent personality disorder                               | Eu32900 | [X]Single major depr ep, severe with psych, psych in<br>remiss  |
| 18 | Eu05212 | [X]Schizophrenia-like psychosis in epilepsy                     | Eu32A00 | [X]Recurr major depr ep, severe with psych, psych in<br>remiss  |
| 19 |         |                                                                 | Eu17300 | [X]Mental and behav dis due to use tobacco:<br>withdrawal state |
| 20 | E13..00 | Other nonorganic psychoses                                      | Eu22300 | [X]Paranoid state in remission                                  |
| 21 | Eu14.00 | [X]Mental and behavioural disorders due to<br>use of cocaine    | Eu1A300 | [X]Mental behav disord due crack cocaine: withdrawal<br>state   |
| 22 | Eu30y00 | [X]Other manic episodes                                         | Eu26.00 | [X]Nonorganic psychosis in remission                            |
| 23 | E112400 | Single major depressive episode, severe, with<br>psychosis      | E105000 | Unspecified latent schizophrenia                                |
| 24 | E100.00 | Simple schizophrenia                                            | E102500 | Catatonic schizophrenia in remission                            |
| 25 | E111400 | Recurrent manic episodes, severe, with<br>psychosis             | E105z00 | Latent schizophrenia NOS                                        |
| 26 | Eu1A.00 | [X]Mental and behavioural disorders due use<br>of crack cocaine | Eu1A500 | [X]Mental behav disord due crack cocaine: psychotic<br>disorder |
| 27 | Eu60212 | [X]Antisocial personality disorder                              | Eu1A200 | [X]Mental behav disorders due use crack cocaine:<br>depend synd |
| 28 | 1BH1.00 | Grandiose delusions                                             | Eu14700 | [X]Men & beh dis due cocaine: resid & late-onset<br>psychot dis |
| 29 | Eu33313 | [X]Recurr severe episodes/major<br>depression+psychotic symptom | L184200 | Mental disorder in the puerperium - baby delivered              |
| 30 | E10y000 | Atypical schizophrenia                                          | Eu31900 | [X]Bipolar affective disorder type II                           |
| 31 | E103000 | Unspecified paranoid schizophrenia                              | Eu11600 | [X]Mental and behav dis due to use opioids: amnesic<br>syndrome |
| 32 | Eu25z11 | [X]Schizoaffective psychosis NOS                                | Eu31911 | [X]Bipolar II disorder                                          |
| 33 | E11zz00 | Other affective psychosis NOS                                   | Eu31800 | [X]Bipolar affective disorder type I                            |
| 34 | E11yz00 | Other and unspecified manic-depressive<br>psychoses NOS         | E103100 | Subchronic paranoid schizophrenia                               |
| 35 | Eu15200 | [X]Mental and behav dis oth stim inc caffein:<br>dependnce synd | Eu25211 | [X]Cyclic schizophrenia                                         |
| 36 | E01y.00 | Other alcoholic psychosis                                       | Eu60211 | [X]Amoral personality disorder                                  |
| 37 | Eu25200 | [X]Schizoaffective disorder, mixed type                         | Eu16700 | [X]Mnt/bh dis due hallucngns: resid & late-onset<br>psychot dis |
| 38 | E00..00 | Senile and presenile organic psychotic<br>conditions            | Eu24.11 | [X]Folie a deux                                                 |
| 39 | Eu60713 | [X]Passive personality disorder                                 | Eu19600 | [X]Mental/behav dis multi drg use/oth psy sbs:                  |
| 40 | Eu31z00 | [X]Bipolar affective disorder, unspecified                      |         |                                                                 |
| 41 | E2Fz.00 | Developmental disorder NOS                                      |         |                                                                 |
| 42 | Eu25000 | [X]Schizoaffective disorder, manic type                         |         |                                                                 |

|    |         |                                                              |               |                                                              |                                                       |
|----|---------|--------------------------------------------------------------|---------------|--------------------------------------------------------------|-------------------------------------------------------|
| 1  | Eu23z00 | [X]Acute and transient psychotic disorder, unspecified       | amnesic syndr | E102400                                                      | Acute exacerbation of chronic catatonic schizophrenia |
| 2  |         |                                                              |               |                                                              |                                                       |
| 3  | Eu20.00 | [X]Schizophrenia                                             | Eu8z.11       | [X]Psychological developmental disorder NOS                  |                                                       |
| 4  | Eu11200 | [X]Mental and behav dis due to use opioids: dependence syndr | Eu17200       | [X]Mental and behav dis due to use tobacco: dependence syndr |                                                       |
| 5  |         |                                                              |               |                                                              |                                                       |
| 6  | Eu22000 | [X]Delusional disorder                                       | E21y000       | Narcissistic personality disorder                            |                                                       |
| 7  | E214z00 | Compulsive personality disorder NOS                          | E115z00       | Bipolar affective disorder, currently depressed, NOS         |                                                       |
| 8  | Eu62y11 | [X]Chronic pain personality syndrome                         | Eu12000       | [X]Mental & behav dis due cannabinoids: acute intoxication   |                                                       |
| 9  |         |                                                              |               |                                                              |                                                       |
| 10 | Eu6yy00 | [X]Other specified disorders of adult personality/behaviour  | E14z.11       | Childhood schizophrenia NOS                                  |                                                       |
| 11 |         |                                                              |               |                                                              |                                                       |
| 12 | Eu20z00 | [X]Schizophrenia, unspecified                                | Eu62100       | [X]Enduring personality change after psychiatric illness     |                                                       |
| 13 | Eu2..00 | [X]Mental disorder, not otherwise specified                  | Eu11100       | [X]Mental and behav dis due to use of opioids: harmful use   |                                                       |
| 14 |         |                                                              |               |                                                              |                                                       |
| 15 | Eu62y00 | [X]Other enduring personality changes                        | Eu25212       | [X]Mixed schizophrenic and affective psychosis               |                                                       |
| 16 | Eu25111 | [X]Schizoaffective psychosis, depressive type                | Eu6y000       | [X]Elaboration of physical symptoms for psychological reason |                                                       |
| 17 |         |                                                              |               |                                                              |                                                       |
| 18 | E115300 | Bipolar affect disord, now depressed, severe, no psychosis   | Eu25z00       | [X]Schizoaffective disorder, unspecified                     |                                                       |
| 19 | E21y100 | Avoidant personality disorder                                | Eu33316       | [X]Recurrent severe episodes/reactive depressive psychosis   |                                                       |
| 20 |         |                                                              |               |                                                              |                                                       |
| 21 | E115100 | Bipolar affective disorder, currently depressed, mild        | Eu60712       | [X]Inadequate personality disorder                           |                                                       |
| 22 |         |                                                              |               |                                                              |                                                       |
| 23 | E114000 | Bipolar affective disorder, currently manic, unspecified     | E106.00       | Residual schizophrenia                                       |                                                       |
| 24 | E21y300 | Passive-aggressive personality disorder                      | Eu60511       | [X]Compulsive personality disorder                           |                                                       |
| 25 | Eu20600 | [X]Simple schizophrenia                                      | Eu60100       | [X]Schizoid personality disorder                             |                                                       |
| 26 | Eu20213 | [X]Schizophrenic catatonia                                   | Eu12500       | [X]Mental & behav dis due to cannabinoids: psychotic disordr |                                                       |
| 27 |         |                                                              |               |                                                              |                                                       |
| 28 | E213.12 | Quarrelsome personality                                      | E212100       | Introverted personality                                      |                                                       |
| 29 | E114100 | Bipolar affective disorder, currently manic, mild            | E10y.00       | Other schizophrenia                                          |                                                       |
| 30 |         |                                                              |               |                                                              |                                                       |
| 31 | E103500 | Paranoid schizophrenia in remission                          | ZS34.00       | Developmental disorder of scholastic skill                   |                                                       |
| 32 | Eu11300 | [X]Mental and behav dis due to use opioids: withdrawal state | Eu21.00       | [X]Schizotypal disorder                                      |                                                       |
| 33 |         |                                                              |               |                                                              |                                                       |
| 34 | E110z00 | Manic disorder, single episode NOS                           | Eu10200       | [X]Mental and behav dis due to use alcohol: dependence syndr |                                                       |
| 35 |         |                                                              |               |                                                              |                                                       |
| 36 | Eu23000 | [X]Acute polymorphic psychot disord without symp of schizoph | Eu3z.00       | [X]Unspecified mood affective disorder                       |                                                       |
| 37 |         |                                                              |               |                                                              |                                                       |
| 38 | E0z..00 | Organic psychoses NOS                                        | Eu30211       | [X]Mania with mood-congruent psychotic symptoms              |                                                       |
| 39 | E110.00 | Manic disorder, single episode                               | E111600       | Recurrent manic episodes, in full remission                  |                                                       |
| 40 |         |                                                              |               |                                                              |                                                       |
| 41 |         |                                                              |               |                                                              |                                                       |
| 42 |         |                                                              |               |                                                              |                                                       |
| 43 |         |                                                              |               |                                                              |                                                       |
| 44 |         |                                                              |               |                                                              |                                                       |
| 45 |         |                                                              |               |                                                              |                                                       |
| 46 |         |                                                              |               |                                                              |                                                       |
| 47 |         |                                                              |               |                                                              |                                                       |
| 48 |         |                                                              |               |                                                              |                                                       |
| 49 |         |                                                              |               |                                                              |                                                       |
| 50 |         |                                                              |               |                                                              |                                                       |
| 51 |         |                                                              |               |                                                              |                                                       |
| 52 |         |                                                              |               |                                                              |                                                       |
| 53 |         |                                                              |               |                                                              |                                                       |
| 54 |         |                                                              |               |                                                              |                                                       |
| 55 |         |                                                              |               |                                                              |                                                       |
| 56 |         |                                                              |               |                                                              |                                                       |
| 57 |         |                                                              |               |                                                              |                                                       |
| 58 |         |                                                              |               |                                                              |                                                       |
| 59 |         |                                                              |               |                                                              |                                                       |
| 60 |         |                                                              |               |                                                              |                                                       |

**ALCOHOL AND DRUG DEPENDENCE****At least one ICD-9 in:**

- 303 Alcohol dependance syndrome
- 305.00 Non dependent alcohol abuse
- 305.00 Alcohol abuse, unspecified
- 305.01 Alcohol abuse, continuous
- 305.03** Alcohol abuse, episodic
- 305.03 Alcohol abuse, in remission
- 304 Drug dependence
- 304.0 Opioid type dependence
- 304.1 Sedative, hypnotic or anxiolytic dependence
- 304.2 Cocaine dependence
- 304.3 Cannabis dependence
- 304.4 Amphetamine and other psychostimulant dependence
- 304.5 Hallucinogen dependence
- 304.6 Other specified drug dependence
- 304.7 Combinations of opioid type drug with any other drug dependence
- 304.8 Combinations of drug dependence excluding opioid type drug
- 304.9 Unspecified drug dependence

OR

**At least one ICD-10 in:**

- F10 Alcohol related disorders
- F10.0 acute intoxication
- F10.1 harmful use
- F10.2 dependence syndrome
- F10.3 withdrawal state
- F10.4 withdrawal state with delirium
- F10.5 psychotic disorder
- F10.6 amnesic syndrome
- F10.7 Residual and late-onset psychotic disorder
- F10.8 other mental and behavioural disorder
- F10.9 unspecified mental and behavioural disorder
- F11 Opioids related disorders
- F12 Cannabis related disorders
- F13 Sedative, hypnotic, or anxiolytic related disorders
- F14 Cocaine related disorders
- F15 Other stimulant related disorders
- F16 Hallucinogen related disorders
- F17 Nicotine dependence
- F18 Inhalant related disorders
- F19 Other psychoactive substance related disorders

OR

## At least one READ code in:

|         |                                                  |         |                                                          |
|---------|--------------------------------------------------|---------|----------------------------------------------------------|
| 136..00 | Alcohol consumption                              | E245z00 | Hallucinogen dependence NOS                              |
| 136K.00 | Alcohol intake above recommended sensible limits | E246.00 | Glue sniffing dependence                                 |
| 136S.00 | Hazardous alcohol use                            | E246000 | Glue sniffing dependence, unspecified                    |
| 136T.00 | Harmful alcohol use                              | E246100 | Glue sniffing dependence, continuous                     |
| 136W.00 | Alcohol misuse                                   | E246200 | Glue sniffing dependence, episodic                       |
| 136Z.00 | Alcohol consumption NOS                          | E246300 | Glue sniffing dependence in remission                    |
| 13c..00 | Drug user                                        | E246z00 | Glue sniffing dependence NOS                             |
| 13c0.00 | Injecting drug user                              | E247.00 | Other specified drug dependence                          |
| 13c1.00 | Intravenous drug user                            | E247.11 | Absinthe addiction                                       |
| 13c2.00 | Never injecting drug user                        | E247000 | Other specified drug dependence, unspecified             |
| 13c3.00 | Intramuscular drug user                          | E247100 | Other specified drug dependence, continuous              |
| 13c4.00 | Intranasal drug user                             | E247200 | Other specified drug dependence, episodic                |
| 13c7.00 | Current drug user                                | E247300 | Other specified drug dependence in remission             |
| 13c9.00 | Subcutaneous drug user                           | E247z00 | Other specified drug dependence NOS                      |
| 13cA.00 | Smokes drugs                                     | E248.00 | Combined opioid with other drug dependence               |
| 13cB.00 | Misuses drugs orally                             | E248000 | Combined opioid with other drug dependence, unspecified  |
| 13cC.00 | Continuous use of drugs                          | E248100 | Combined opioid with other drug dependence, continuous   |
| 13cD.00 | Episodic use of drugs                            | E248200 | Combined opioid with other drug dependence, episodic     |
| 13cE.00 | Prolonged high dose use of cannabis              | E248300 | Combined opioid with other drug dependence in remission  |
| 13cH.00 | Persistent substance misuse                      | E248z00 | Combined opioid with other drug dependence NOS           |
| 13cJ.00 | Previously injecting drug user                   | E249.00 | Combined drug dependence, excluding opioids              |
| 13cK.00 | Current non recreational drug user               | E249000 | Combined drug dependence, excluding opioid, unspecified  |
| 1462.00 | H/O: alcoholism                                  | E249100 | Combined drug dependence, excluding opioid, continuous   |
| 1463.00 | H/O: drug dependency                             | E249200 | Combined drug dependence, excluding opioid, episodic     |
| 146E.00 | H/O: recreational drug use                       | E249300 | Combined drug dependence, excluding opioid, in remission |
| 146F.00 | H/O: drug abuse                                  | E249z00 | Combined drug dependence, excluding opioid, NOS          |
| 1B1c.00 | Alcohol induced hallucinations                   | E24A.00 | Ecstasy type drug dependence                             |
| 1P30.00 | Compulsive uncontrollable drug taking            | E24z.00 | Drug dependence NOS                                      |
| 1P31.00 | Compulsive drug taking                           | E250.11 | Drunkenness NOS                                          |
| 1P6..00 | Craving for drugs                                | E250.12 | Hangover (alcohol)                                       |
| 1P62.00 | Abnormal craving for drugs                       | E250.13 | Inebriety NOS                                            |
| 1T...00 | History of substance misuse                      | E250.14 | Intoxication - alcohol                                   |
| 1T0..00 | H/O heroin misuse                                | E254.11 | Barbiturate abuse                                        |
| 1T00.00 | H/O daily heroin misuse                          | E254.12 | Hypnotic or anxiolytic abuse                             |
| 1T01.00 | H/O weekly heroin misuse                         | E254.13 | Sedative abuse                                           |
| 1T02.00 | Previous history of heroin misuse                | E254.14 | Tranquilliser abuse                                      |
| 1T03.00 | H/O infrequent heroin misuse                     | E257.11 | Psychostimulant abuse                                    |
| 1T1..00 | H/O methadone misuse                             | E257.12 | Stimulant abuse                                          |
| 1T10.00 | H/O daily methadone misuse                       | E259400 | Misuse of prescription only drugs                        |
| 1T11.00 | H/O weekly methadone misuse                      | E25y.11 | Analgesic abuse                                          |
| 1T12.00 | H/O infrequent methadone misuse                  | E25y.12 | Laxative abuse                                           |
| 1T13.00 | Previous history of methadone misuse             | E25y.13 | Steroid abuse                                            |

|    |         |                                           |         |                                                                |
|----|---------|-------------------------------------------|---------|----------------------------------------------------------------|
| 1  | 1T2..00 | H/O ecstasy misuse                        | E25z.00 | Misuse of drugs NOS                                            |
| 2  | 1T20.00 | H/O daily ecstasy misuse                  | Eu1..00 | [X]Mental and behavioural disorders due to psychoactive subs   |
| 3  | 1T21.00 | H/O weekly ecstasy misuse                 | Eu10.00 | [X]Mental and behavioural disorders due to use of alcohol      |
| 4  |         |                                           |         |                                                                |
| 5  | 1T22.00 | H/O infrequent ecstasy misuse             | Eu10000 | [X]Mental & behav dis due to use alcohol: acute intoxication   |
| 6  |         |                                           |         |                                                                |
| 7  | 1T23.00 | Previous history of ecstasy misuse        | Eu10011 | [X]Acute alcoholic drunkenness                                 |
| 8  | 1T3..00 | H/O benzodiazepine misuse                 | Eu10100 | [X]Mental and behav dis due to use of alcohol: harmful use     |
| 9  |         |                                           |         |                                                                |
| 10 | 1T30.00 | H/O daily benzodiazepine misuse           | Eu10200 | [X]Mental and behav dis due to use alcohol: dependence syndr   |
| 11 |         |                                           |         |                                                                |
| 12 | 1T31.00 | H/O weekly benzodiazepine misuse          | Eu10211 | [X]Alcohol addiction                                           |
| 13 | 1T32.00 | H/O infrequent benzodiazepine misuse      | Eu10212 | [X]Chronic alcoholism                                          |
| 14 | 1T33.00 | Previous history of benzodiazepine misuse | Eu10213 | [X]Dipsomania                                                  |
| 15 | 1T4..00 | H/O amphetamine misuse                    | Eu10300 | [X]Mental and behav dis due to use alcohol: withdrawal state   |
| 16 |         |                                           |         |                                                                |
| 17 | 1T40.00 | H/O daily amphetamine misuse              | Eu10400 | [X]Men & behav dis due alcohol: withdrawal state with delirium |
| 18 |         |                                           |         |                                                                |
| 19 | 1T41.00 | H/O weekly amphetamine misuse             | Eu10411 | [X]Delirium tremens, alcohol induced                           |
| 20 | 1T42.00 | H/O infrequent amphetamine misuse         | Eu10500 | [X]Mental & behav dis due to use alcohol: psychotic disorder   |
| 21 |         |                                           |         |                                                                |
| 22 | 1T43.00 | Previous history of amphetamine misuse    | Eu10511 | [X]Alcoholic hallucinosis                                      |
| 23 | 1T5..00 | H/O cocaine misuse                        | Eu10512 | [X]Alcoholic jealousy                                          |
| 24 | 1T50.00 | H/O daily cocaine misuse                  | Eu10513 | [X]Alcoholic paranoia                                          |
| 25 | 1T51.00 | H/O weekly cocaine misuse                 | Eu10514 | [X]Alcoholic psychosis NOS                                     |
| 26 | 1T52.00 | H/O infrequent cocaine misuse             | Eu10600 | [X]Mental and behav dis due to use alcohol: amnesic syndrome   |
| 27 |         |                                           |         |                                                                |
| 28 | 1T53.00 | Previous history of cocaine misuse        | Eu10611 | [X]Korsakov's psychosis, alcohol induced                       |
| 29 | 1T6..00 | H/O crack cocaine misuse                  | Eu10700 | [X]Men & behav dis due alcohol: resid & late-onset psychot dis |
| 30 |         |                                           |         |                                                                |
| 31 | 1T60.00 | H/O daily crack cocaine misuse            | Eu10711 | [X]Alcoholic dementia NOS                                      |
| 32 | 1T61.00 | H/O weekly crack cocaine misuse           | Eu10712 | [X]Chronic alcoholic brain syndrome                            |
| 33 | 1T62.00 | H/O infrequent crack cocaine misuse       | Eu10800 | [X]Alcohol withdrawal-induced seizure                          |
| 34 | 1T63.00 | Previous history of crack cocaine misuse  | Eu10y00 | [X]Men & behav dis due to use alcohol: oth men & behav dis     |
| 35 |         |                                           |         |                                                                |
| 36 | 1T7..00 | H/O hallucinogen misuse                   | Eu10z00 | [X]Ment & behav dis due use alcohol: unsp ment & behav dis     |
| 37 |         |                                           |         |                                                                |
| 38 | 1T73.00 | Previous history of hallucinogen misuse   | Eu11.00 | [X]Mental and behavioural disorders due to use of opioids      |
| 39 |         |                                           |         |                                                                |
| 40 | 1T8..00 | H/O cannabis misuse                       | Eu11000 | [X]Mental & behav dis due to use opioids: acute intoxication   |
| 41 |         |                                           |         |                                                                |
| 42 | 1T80.00 | H/O daily cannabis misuse                 | Eu11100 | [X]Mental and behav dis due to use of opioids: harmful use     |
| 43 |         |                                           |         |                                                                |
| 44 | 1T81.00 | H/O weekly cannabis misuse                | Eu11200 | [X]Mental and behav dis due to use opioids: dependence syndr   |
| 45 |         |                                           |         |                                                                |
| 46 | 1T82.00 | H/O infrequent cannabis misuse            | Eu11211 | [X]Drug addiction - opioids                                    |
| 47 | 1T83.00 | Previous history of cannabis misuse       | Eu11212 | [X]Heroin addiction                                            |
| 48 | 1T9..00 | H/O solvent misuse                        | Eu11300 | [X]Mental and behav dis due to use opioids: withdrawal state   |
| 49 |         |                                           |         |                                                                |
| 50 | 1T90.00 | H/O daily solvent misuse                  | Eu11311 | [X]Cold turkey, opiate withdrawal                              |
| 51 | 1T91.00 | H/O weekly solvent misuse                 | Eu11400 | [X]Men & behav dis due opioid: withdrawal state with delirium  |
| 52 |         |                                           |         |                                                                |
| 53 | 1T93.00 | Previous history of solvent misuse        | Eu11500 | [X]Mental & behav dis due to use opioids: psychotic disorder   |
| 54 |         |                                           |         |                                                                |
| 55 | 1TA..00 | H/O barbiturate misuse                    | Eu11600 | [X]Mental and behav dis due to use opioids: amnesic syndrome   |
| 56 |         |                                           |         |                                                                |
| 57 | 1TB..00 | H/O major tranquilliser misuse            | Eu11700 | [X]Men & beh dis due opioids: resid & late-onset psychot dis   |
| 58 |         |                                           |         |                                                                |
| 59 |         |                                           |         |                                                                |

|    |         |                                            |         |                                                               |
|----|---------|--------------------------------------------|---------|---------------------------------------------------------------|
| 1  | 1TB0.00 | H/O daily major tranquilliser misuse       | Eu11y00 | [X]Men & behav dis due to use opioids: oth men & behav dis    |
| 2  | 1TC..00 | H/O anti-depressant misuse                 | Eu11z00 | [X]Ment & behav dis due use opioids: unsp ment & behav dis    |
| 3  |         |                                            |         |                                                               |
| 4  | 1TC0.00 | H/O daily anti-depressant misuse           | Eu12.00 | [X]Mental and behavioural disorders due to use cannabinoids   |
| 5  |         |                                            |         |                                                               |
| 6  | 1TC3.00 | Previous history of anti-depressant misuse | Eu12000 | [X]Mental & behav dis due cannabinoids: acute intoxication    |
| 7  |         |                                            |         |                                                               |
| 8  | 1TD..00 | H/O opiate misuse                          | Eu12100 | [X]Mental and behav dis due to use cannabinoids: harmful use  |
| 9  |         |                                            |         |                                                               |
| 10 | 1TD0.00 | H/O daily opiate misuse                    | Eu12200 | [X]Mental and behav dis due to cannabinoids: dependence synd  |
| 11 |         |                                            |         |                                                               |
| 12 | 1TD1.00 | H/O weekly opiate misuse                   | Eu12211 | [X]Drug addiction - cannabis                                  |
| 13 | 1TD2.00 | H/O infrequent opiate misuse               | Eu12300 | [X]Mental and behav dis due cannabinoids: withdrawal state    |
| 14 |         |                                            |         |                                                               |
| 15 | 1TD3.00 | Previous history of opiate misuse          | Eu12500 | [X]Mental & behav dis due to cannabinoids: psychotic disorder |
| 16 |         |                                            |         |                                                               |
| 17 | 1TE..00 | Uses heroin on top of substitution therapy | Eu12600 | [X]Mental and behav dis due to use cannabinoids: amnesic syn  |
| 18 |         |                                            |         |                                                               |
| 19 | 1V...00 | Drug misuse behaviour                      | Eu12700 | [X]Mnt/bh dis due cannabinds: resid & late-onset psychot dis  |
| 20 |         |                                            |         |                                                               |
| 21 | 1V0..00 | Misuses drugs                              | Eu12y00 | [X]Men/behav dis due to use cannabinoids: oth men/behav disd  |
| 22 |         |                                            |         |                                                               |
| 23 | 1V01.00 | Long-term drug misuser                     | Eu12z00 | [X]Ment/behav dis due use cannabinoids: unsp ment/behav disd  |
| 24 |         |                                            |         |                                                               |
| 25 | 1V02.00 | Poly-drug misuser                          | Eu13.00 | [X]Mental and behavioural dis due use sedatives/hypnotics     |
| 26 |         |                                            |         |                                                               |
| 27 | 1V08.00 | Smokes drugs in cigarette form             | Eu13000 | [X]Mental & behav dis due seds/hypntcs: acute intoxication    |
| 28 |         |                                            |         |                                                               |
| 29 | 1V09.00 | Smokes drugs through a pipe                | Eu13100 | [X]Mental and behav dis due to use seds/hypntcs: harmful use  |
| 30 |         |                                            |         |                                                               |
| 31 | 1V0A.00 | Chases the dragon                          | Eu13200 | [X]Mental and behav dis due to seds/hypntcs: dependence synd  |
| 32 |         |                                            |         |                                                               |
| 33 | 1V0B.00 | Sniffs drugs                               | Eu13211 | [X]Drug addiction- sedative / hypnotics                       |
| 34 | 1V0C.00 | Drug addict                                | Eu13300 | [X]Mental and behav dis due seds/hypntcs: withdrawal state    |
| 35 |         |                                            |         |                                                               |
| 36 | 1V0E.00 | Health problem secondary to drug misuse    | Eu13400 | [X]Men & beh dis due seds/hypns: withdrwl state wth delirium  |
| 37 |         |                                            |         |                                                               |
| 38 | 1V26.00 | Misused drugs in past                      | Eu13500 | [X]Mental & behav dis due to seds/hypntcs: psychotic disorder |
| 39 |         |                                            |         |                                                               |
| 40 | 1V3..00 | Drug injection behaviour                   | Eu14.00 | [X]Mental and behavioural disorders due to use of cocaine     |
| 41 |         |                                            |         |                                                               |
| 42 | 1V4..00 | Priority of drug-related activities        | Eu14000 | [X]Mental & behav dis due to use cocaine: acute intoxication  |
| 43 |         |                                            |         |                                                               |
| 44 | 1V5..00 | Routine of drug-related activities         | Eu14100 | [X]Mental and behav dis due to use of cocaine: harmful use    |
| 45 |         |                                            |         |                                                               |
| 46 | 1V6..00 | Drug-related offending behaviour           | Eu14200 | [X]Mental and behav dis due to use cocaine: dependence syndr  |
| 47 |         |                                            |         |                                                               |
| 48 | 1V64.00 | Illicit drug use                           | Eu14211 | [X]Drug addiction - cocaine                                   |
| 49 | 1V65.00 | Heroin misuse                              | Eu14300 | [X]Mental and behav dis due to use cocaine: withdrawal state  |
| 50 |         |                                            |         |                                                               |
| 51 | 1V66.00 | Ecstasy misuse                             | Eu14500 | [X]Mental & behav dis due to use cocaine: psychotic disorder  |
| 52 |         |                                            |         |                                                               |
| 53 | 222N.00 | O/E - signs of drug withdrawal             | Eu14700 | [X]Men & beh dis due cocaine: resid & late-onset psychot dis  |
| 54 |         |                                            |         |                                                               |
| 55 | C150500 | Alcohol-induced pseudo-Cushing's syndrome  | Eu15.00 | [X]Mental & behav disorder due other stimulants inc caffein   |
| 56 |         |                                            |         |                                                               |
| 57 | E01..00 | Alcoholic psychoses                        | Eu15000 | [X]Mnt/beh dis due oth stim inc caffein: acute intoxication   |
| 58 |         |                                            |         |                                                               |
| 59 | E010.00 | Alcohol withdrawal delirium                | Eu15100 | [X]Ment/behav dis due to use oth stims inc caff: harmful use  |

|    |         |                                                         |         |                                                              |
|----|---------|---------------------------------------------------------|---------|--------------------------------------------------------------|
| 1  | E010.11 | DTs - delirium tremens                                  | Eu15200 | [X]Mental and behav dis oth stim inc caffein: dependnce synd |
| 2  | E010.12 | Delirium tremens                                        | Eu15211 | [X]Drug addiction-other stimul                               |
| 3  | E011.00 | Alcohol amnestic syndrome                               | Eu15300 | [X]Mnt/behav dis other stimInts inc caffeine: withdrwl state |
| 4  |         |                                                         |         |                                                              |
| 5  | E011000 | Korsakov's alcoholic psychosis                          | Eu15500 | [X]Mental/behav dis oth stims inc caffeine: psychotic dis    |
| 6  |         |                                                         |         |                                                              |
| 7  | E011100 | Korsakov's alcoholic psychosis with peripheral neuritis | Eu15700 | [X]Mnt/bh dis oth stm inc caffne resid/late-onset psycht dis |
| 8  |         |                                                         |         |                                                              |
| 9  | E011z00 | Alcohol amnestic syndrome NOS                           | Eu15z00 | [X]Ment/beh dis oth stims inc caffeine: unsp ment/behav disd |
| 10 |         |                                                         |         |                                                              |
| 11 | E012.00 | Other alcoholic dementia                                | Eu16.00 | [X]Mental and behavioural disorders due to use hallucinogens |
| 12 |         |                                                         |         |                                                              |
| 13 | E012.11 | Alcoholic dementia NOS                                  | Eu16000 | [X]Mental & behav dis due hallucinogens: acute intoxicatn    |
| 14 |         |                                                         |         |                                                              |
| 15 | E012000 | Chronic alcoholic brain syndrome                        | Eu16100 | [X]Mental and behav dis due to use hallucinogens: harmfl use |
| 16 |         |                                                         |         |                                                              |
| 17 | E013.00 | Alcohol withdrawal hallucinosis                         | Eu16200 | [X]Mental and behav dis due to hallucinogens: dependence syn |
| 18 |         |                                                         |         |                                                              |
| 19 | E014.00 | Pathological alcohol intoxication                       | Eu16211 | [X]Drug addiction - hallucinogen                             |
| 20 | E015.00 | Alcoholic paranoia                                      | Eu16300 | [X]Mental and behav dis due hallucinogens: withdrawal state  |
| 21 |         |                                                         |         |                                                              |
| 22 | E01y.00 | Other alcoholic psychosis                               | Eu16500 | [X]Mental & behav dis due to hallucinogens: psychotic disord |
| 23 |         |                                                         |         |                                                              |
| 24 | E01y000 | Alcohol withdrawal syndrome                             | Eu16700 | [X]Mnt/bh dis due hallucngns: resid & late-onset psychot dis |
| 25 |         |                                                         |         |                                                              |
| 26 | E01yz00 | Other alcoholic psychosis NOS                           | Eu16711 | [X]Post hallucinogen perception disorder                     |
| 27 | E01z.00 | Alcoholic psychosis NOS                                 | Eu16z00 | [X]Ment/behav dis due use hallucinogens: unsp ment/behav dis |
| 28 |         |                                                         |         |                                                              |
| 29 | E02..00 | Drug psychoses                                          | Eu18.00 | [X]Mental & behav disorders due to use of volatile solvents  |
| 30 |         |                                                         |         |                                                              |
| 31 | E020.00 | Drug withdrawal syndrome                                | Eu18000 | [X]Mental & behav dis due vol solvents: acute intoxication   |
| 32 |         |                                                         |         |                                                              |
| 33 | E021.00 | Drug-induced paranoia or hallucinatory states           | Eu18100 | [X]Mental and behav dis due volatile solvents: harmful use   |
| 34 |         |                                                         |         |                                                              |
| 35 | E021000 | Drug-induced paranoid state                             | Eu18200 | [X]Mental and behav dis due to vol solvents: dependence synd |
| 36 |         |                                                         |         |                                                              |
| 37 | E021100 | Drug-induced hallucinosis                               | Eu18211 | [X]Drug addiction - solvent                                  |
| 38 | E021z00 | Drug-induced paranoia or hallucinatory state NOS        | Eu18400 | [X]Men & beh dis vol solvents: withdrawal state wth delirium |
| 39 |         |                                                         |         |                                                              |
| 40 | E022.00 | Pathological drug intoxication                          | Eu18500 | [X]Mental & behav dis due to vol solvents: psychotic disordr |
| 41 |         |                                                         |         |                                                              |
| 42 | E023.00 | Nicotine withdrawal                                     | Eu18z00 | [X]Ment/behav dis due use vol solvents: unsp ment/behav dis  |
| 43 |         |                                                         |         |                                                              |
| 44 | E02y.00 | Other drug psychoses                                    | Eu19.00 | [X]Men & behav disorder multiple drug use/psychoactive subst |
| 45 |         |                                                         |         |                                                              |
| 46 | E02y000 | Drug-induced delirium                                   | Eu19000 | [X]Mental/behav dis multi drg use/psychoac subs: acute intox |
| 47 |         |                                                         |         |                                                              |
| 48 | E02y100 | Drug-induced dementia                                   | Eu19100 | [X]Mental and behav dis mlti drg/oth psychoa sbs: harmfl use |
| 49 |         |                                                         |         |                                                              |
| 50 | E02y300 | Drug-induced depressive state                           | Eu19200 | [X]Mental and behav dis mlti/oth psych sbs: dependence syndr |
| 51 |         |                                                         |         |                                                              |
| 52 | E02y400 | Drug-induced personality disorder                       | Eu19211 | [X]Drug addiction NOS                                        |
| 53 | E02yz00 | Other drug psychoses NOS                                | Eu19300 | [X]Mental and behav dis mlti/oth psychoa sbs: withdrwl state |
| 54 |         |                                                         |         |                                                              |
| 55 | E02z.00 | Drug psychosis NOS                                      | Eu19400 | [X]Mnt/bh dis mlti drg use/oth psy sbs: wthdr state + dlrium |
| 56 |         |                                                         |         |                                                              |
| 57 | E040.11 | Korsakoff's non-alcoholic psychosis                     | Eu19500 | [X]Ment/behav dis mlti drug use/oth psyc sbs: psychotc dis   |
| 58 |         |                                                         |         |                                                              |
| 59 | E23..00 | Alcohol dependence syndrome                             | Eu19600 | [X]Mental/behav dis multi drg use/oth psy sbs:               |

|    |         |                                                             |         |                                                                                 |
|----|---------|-------------------------------------------------------------|---------|---------------------------------------------------------------------------------|
| 1  | E23..11 | Alcoholism                                                  | Eu19700 | amnesic syndr<br>[X]Men/beh dis mlt drg use/oth subs: resid/late<br>psychot dis |
| 2  |         |                                                             |         |                                                                                 |
| 3  | E23..12 | Alcohol problem drinking                                    | Eu19y00 | [X]Men/beh dis mlt drg use/oth psy sbs: oth men<br>& behav dis                  |
| 4  |         |                                                             |         |                                                                                 |
| 5  | E230.00 | Acute alcoholic intoxication in alcoholism                  | Eu19z00 | [X]Ment/beh dis multi drug use/oth psy sbs unsp<br>mnt/beh dis                  |
| 6  |         |                                                             |         |                                                                                 |
| 7  | E230.11 | Alcohol dependence with acute alcoholic<br>intoxication     | Eu1A.00 | [X]Mental and behavioural disorders due use of<br>crack cocaine                 |
| 8  |         |                                                             |         |                                                                                 |
| 9  | E230000 | Acute alcoholic intoxication, unspecified, in<br>alcoholism | Eu1A000 | [X]Ment behav dis due use crack cocaine: acute<br>intoxication                  |
| 10 |         |                                                             |         |                                                                                 |
| 11 | E230100 | Continuous acute alcoholic intoxication in<br>alcoholism    | Eu1A100 | [X]Mental behav disorders due use crack cocaine:<br>harmful use                 |
| 12 |         |                                                             |         |                                                                                 |
| 13 | E230200 | Episodic acute alcoholic intoxication in<br>alcoholism      | Eu1A200 | [X]Mental behav disorders due use crack cocaine:<br>depend synd                 |
| 14 |         |                                                             |         |                                                                                 |
| 15 | E230300 | Acute alcoholic intoxication in remission, in<br>alcoholism | Eu1A300 | [X]Mental behav disord due crack cocaine:<br>withdrawal state                   |
| 16 |         |                                                             |         |                                                                                 |
| 17 | E230z00 | Acute alcoholic intoxication in alcoholism<br>NOS           | Eu1A500 | [X]Mental behav disord due crack cocaine:<br>psychotic disorder                 |
| 18 |         |                                                             |         |                                                                                 |
| 19 | E231.00 | Chronic alcoholism                                          | Eu1Az00 | [X]Ment behav dis due crack cocaine: unsp ment<br>and behav dis                 |
| 20 |         |                                                             |         |                                                                                 |
| 21 |         |                                                             |         |                                                                                 |
| 22 | E231.11 | Dipsomania                                                  | F11x000 | Cerebral degeneration due to alcoholism                                         |
| 23 | E231000 | Unspecified chronic alcoholism                              | F11x011 | Alcoholic encephalopathy                                                        |
| 24 | E231100 | Continuous chronic alcoholism                               | F144000 | Cerebellar ataxia due to alcoholism                                             |
| 25 | E231200 | Episodic chronic alcoholism                                 | F25B.00 | Alcohol-induced epilepsy                                                        |
| 26 | E231300 | Chronic alcoholism in remission                             | F375.00 | Alcoholic polyneuropathy                                                        |
| 27 | E231z00 | Chronic alcoholism NOS                                      | F394000 | Drug-induced myopathy                                                           |
| 28 |         |                                                             |         |                                                                                 |
| 29 | E23z.00 | Alcohol dependence syndrome NOS                             | F394100 | Alcoholic myopathy                                                              |
| 30 | E24..00 | Drug dependence                                             | G555.00 | Alcoholic cardiomyopathy                                                        |
| 31 | E24..11 | Drug addiction                                              | G852300 | Oesophageal varices in alcoholic cirrhosis of the<br>liver                      |
| 32 |         |                                                             |         |                                                                                 |
| 33 | E240.00 | Opioid type drug dependence                                 | J153.00 | Alcoholic gastritis                                                             |
| 34 | E240.11 | Heroin dependence                                           | J610.00 | Alcoholic fatty liver                                                           |
| 35 | E240.12 | Methadone dependence                                        | J611.00 | Acute alcoholic hepatitis                                                       |
| 36 | E240.13 | Morphine dependence                                         | J612.00 | Alcoholic cirrhosis of liver                                                    |
| 37 | E240.14 | Opium dependence                                            | J612000 | Alcoholic fibrosis and sclerosis of liver                                       |
| 38 | E240000 | Unspecified opioid dependence                               | J613.00 | Alcoholic liver damage unspecified                                              |
| 39 | E240100 | Continuous opioid dependence                                | J613000 | Alcoholic hepatic failure                                                       |
| 40 | E240200 | Episodic opioid dependence                                  | J617.00 | Alcoholic hepatitis                                                             |
| 41 | E240300 | Opioid dependence in remission                              | J617000 | Chronic alcoholic hepatitis                                                     |
| 42 | E240z00 | Opioid drug dependence NOS                                  | J61y.00 | Other non-alcoholic chronic liver disease                                       |
| 43 | E241.00 | Hypnotic or anxiolytic dependence                           | J670800 | Alcohol-induced acute pancreatitis                                              |
| 44 | E241.11 | Anxiolytic dependence                                       | J671000 | Alcohol-induced chronic pancreatitis                                            |
| 45 | E241.12 | Barbiturate dependence                                      | L183.00 | Drug dependence in pregnancy, childbirth and the<br>puerperium                  |
| 46 |         |                                                             |         |                                                                                 |
| 47 |         |                                                             |         |                                                                                 |
| 48 | E241.13 | Benzodiazepine dependence                                   | L183.11 | Pregnancy and drug dependence                                                   |
| 49 | E241.14 | Diazepam dependence                                         | L183100 | Drug dependence during pregnancy - baby<br>delivered                            |
| 50 |         |                                                             |         |                                                                                 |
| 51 | E241.15 | Librium dependence                                          | L183300 | Drug dependence during pregnancy - baby not yet<br>delivered                    |
| 52 |         |                                                             |         |                                                                                 |
| 53 | E241.16 | Sedative dependence                                         | L183z00 | Drug dependence during<br>pregnancy/childbirth/puerperium NOS                   |
| 54 |         |                                                             |         |                                                                                 |
| 55 | E241.17 | Valium dependence                                           | L255300 | Maternal care for (suspected) damage to fetus<br>from alcohol                   |
| 56 |         |                                                             |         |                                                                                 |
| 57 | E241000 | Hypnotic or anxiolytic dependence,<br>unspecified           | SM0..00 | Alcohol causing toxic effect                                                    |
| 58 |         |                                                             |         |                                                                                 |
| 59 |         |                                                             |         |                                                                                 |
| 60 |         |                                                             |         |                                                                                 |



|    |                                                                |                                                             |
|----|----------------------------------------------------------------|-------------------------------------------------------------|
| 1  | E241100 Hypnotic or anxiolytic dependence, continuous          | SM00.00 Ethyl alcohol causing toxic effect                  |
| 2  | E241200 Hypnotic or anxiolytic dependence, episodic            | SM00000 Ethanol causing toxic effect                        |
| 3  |                                                                |                                                             |
| 4  | E241300 Hypnotic or anxiolytic dependence in remission         | SM00100 Denatured alcohol causing toxic effect              |
| 5  |                                                                |                                                             |
| 6  | E241z00 Hypnotic or anxiolytic dependence NOS                  | SM00z00 Ethyl alcohol causing toxic effect NOS              |
| 7  | E242.00 Cocaine type drug dependence                           | SM01.00 Methyl alcohol causing toxic effect                 |
| 8  | E242000 Cocaine dependence, unspecified                        | SM01000 Methanol causing toxic effect                       |
| 9  | E242100 Cocaine dependence, continuous                         | SM01100 Wood alcohol causing toxic effect                   |
| 10 | E242200 Cocaine dependence, episodic                           | SM02.00 Isopropyl alcohol causing toxic effect              |
| 11 | E242300 Cocaine dependence in remission                        | SM03000 Amyl alcohol causing toxic effect                   |
| 12 | E242z00 Cocaine drug dependence NOS                            | SM03100 Butyl alcohol causing toxic effect                  |
| 13 | E243.00 Cannabis type drug dependence                          | SM0y.00 Other alcohol causing toxic effect                  |
| 14 | E243.11 Hashish dependence                                     | SM0z.00 Alcohol causing toxic effect NOS                    |
| 15 | E243.12 Hemp dependence                                        | SyuG000 [X]Toxic effect of other alcohols                   |
| 16 | E243.13 Marihuana dependence                                   | Z1Q6200 Methadone maintenance                               |
| 17 | E243000 Cannabis dependence, unspecified                       | Z1Q6214 Heroin maintenance                                  |
| 18 | E243100 Cannabis dependence, continuous                        | ZV11300 [V]Personal history of alcoholism                   |
| 19 | E243200 Cannabis dependence, episodic                          | ZV11311 [V]Problems related to lifestyle alcohol use        |
| 20 | E243300 Cannabis dependence in remission                       | ZV11400 [V]Personal history of psychoactive substance abuse |
| 21 |                                                                |                                                             |
| 22 | E243z00 Cannabis drug dependence NOS                           | ZV11500 [V]Personal history of drug abuse by injection      |
| 23 | E244.00 Amphetamine or other psychostimulant dependence        | ZV4K100 [V]Drug use                                         |
| 24 |                                                                |                                                             |
| 25 | E244.11 Psychostimulant dependence                             | ZV4KC00 [V] Alcohol use                                     |
| 26 | E244.12 Stimulant dependence                                   | E245.11 LSD dependence                                      |
| 27 | E244000 Amphetamine or psychostimulant dependence, unspecified | E245.12 Lysergic acid diethylamide dependence               |
| 28 | E244100 Amphetamine or psychostimulant dependence, continuous  | E245000 Hallucinogen dependence, unspecified                |
| 29 | E244200 Amphetamine or psychostimulant dependence, episodic    | E245100 Hallucinogen dependence, continuous                 |
| 30 | E244300 Amphetamine or psychostimulant dependence in remission | E245200 Hallucinogen dependence, episodic                   |
| 31 | E244z00 Amphetamine or psychostimulant dependence NOS          | E245300 Hallucinogen dependence in remission                |
| 32 | E244z11 Amphetamine or psychostimulant dependence NOS          | E245.00 Hallucinogen dependence                             |
| 33 |                                                                |                                                             |
| 34 |                                                                |                                                             |
| 35 |                                                                |                                                             |
| 36 |                                                                |                                                             |
| 37 |                                                                |                                                             |
| 38 |                                                                |                                                             |
| 39 |                                                                |                                                             |
| 40 |                                                                |                                                             |
| 41 |                                                                |                                                             |
| 42 |                                                                |                                                             |
| 43 |                                                                |                                                             |
| 44 |                                                                |                                                             |
| 45 |                                                                |                                                             |
| 46 |                                                                |                                                             |
| 47 |                                                                |                                                             |
| 48 |                                                                |                                                             |
| 49 |                                                                |                                                             |
| 50 |                                                                |                                                             |
| 51 |                                                                |                                                             |
| 52 |                                                                |                                                             |
| 53 |                                                                |                                                             |
| 54 |                                                                |                                                             |
| 55 |                                                                |                                                             |
| 56 |                                                                |                                                             |
| 57 |                                                                |                                                             |
| 58 |                                                                |                                                             |
| 59 |                                                                |                                                             |
| 60 |                                                                |                                                             |

**ATTEMPTED SUICIDE****At least one ICD-9 in:**

- E950 Self-inflicted poisoning
- E950.0 Self-inflicted poisoning by analgesics antipyretics and antirheumatics
  - E950.1 Self-inflicted poisoning by barbiturates
  - E950.2 Self-inflicted poisoning by other sedatives and hypnotics
  - E950.3 Self-inflicted poisoning by tranquilizers and other psychotropic agents
  - E950.4 Self-inflicted poisoning by other specified drugs and medicinal substances
  - E950.5 Self-inflicted poisoning by unspecified drug or medicinal substance
  - E950.6 Self-inflicted poisoning by agricultural and horticultural chemical and pharmaceutical preparations other than plant foods and fertilizers
  - E950.7 Self-inflicted poisoning by corrosive and caustic substances
  - E950.8 Self-inflicted poisoning by arsenic and its compounds
  - E950.9 Self-inflicted poisoning by other and unspecified solid and liquid substances
- E951 Self-inflicted poisoning
- E951.0 Self-inflicted poisoning by gas distributed by pipeline
  - E951.1 Self-inflicted poisoning by liquefied petroleum gas distributed in mobile containers
  - E951.8 Self-inflicted poisoning by other utility gas
- E952 Self-inflicted poisoning
- E952.0 Self-inflicted poisoning by motor vehicle exhaust gas
  - E952.1 Self-inflicted poisoning by other carbon monoxide
  - E952.8 Self-inflicted poisoning by other specified gases and vapors
  - E952.9 Self-inflicted poisoning by un specified gases and vapors
- E953 Self-inflicted injury by hanging, strangulation and suffocation
- E953.0 Self-inflicted injury by hanging
  - E953.1 Self-inflicted injury by suffocation by plastic bag
  - E953.8 Self-inflicted injury by other specified means
  - E953.9 Self-inflicted injury by other unspecified means
- E954 Self-inflicted injury by drowning
- E955 Self-inflicted injury by firearms and explosives
- E955.0 Self-inflicted injury by handgun
  - E955.1 Self-inflicted injury by shotgun
  - E955.2 Self-inflicted injury by hunting rifle
  - E955.3 Self-inflicted injury by military firearms
  - E955.4 Self-inflicted injury by other and unspecified firearm
  - E955.5 Self-inflicted injury by explosives
  - E955.6 Self-inflicted injury by air gun
  - E955.7 Self-inflicted injury by paintball gun
  - E955.9 Self-inflicted injury by firearms and explosives unspecified
- E956 Self-inflicted injury by cutting and piercing instrument
- E957 Self-inflicted injury by jumping from high places
- E957.0 Self-inflicted injury by jumping from residential premises
  - E957.1 Self-inflicted injuries by jumping from other man-made structures
  - E957.2 Self-inflicted injuries by jumping from natural sites
  - E957.9 Self-inflicted injuries by jumping from unspecified site
- E958 Self-inflicted injury
- E958.0 Self-inflicted injury by jumping or lying before a moving object
  - E958.1-E958.2 Self-inflicted injury by smoke, fire, flames, steam, hot vapours and

hot objects

E958.3, E958.4, E958.6-E958.9 Self-inflicted injury by other and unspecified means

E958.5 Self-inflicted injury by crashing of motor vehicle

E959 Late effects of self-inflicted injury

OR

**At least one ICD-10 in:**

X60-84 Intentional self-harm

X60 Intentional self-poisoning by and exposure to nonopioid analgesics, antipyretics and antirheumatics

X61 Intentional self-poisoning by and exposure to antiepileptic, sedative-hypnotic, antiparkinsonism and psychotropic drugs, not elsewhere classified

X62 Intentional self-poisoning by and exposure to narcotics and psychodysleptics [hallucinogens], not elsewhere classified

X63 Intentional self-poisoning by and exposure to other drugs acting on the autonomic nervous system

X64 Intentional self-poisoning by and exposure to other and unspecified drugs, medicaments and biological substances

X65 Intentional self-poisoning by and exposure to alcohol

X66 Intentional self-poisoning by and exposure to organic solvents and halogenated hydrocarbons and their vapours

X67 Intentional self-poisoning by and exposure to other gases and vapours

X68 Intentional self-poisoning by and exposure to pesticides

X69 Intentional self-poisoning by and exposure to other and unspecified chemicals and noxious substances

X70 Intentional self-harm by hanging, strangulation and suffocation

X71 Intentional self-harm by drowning and submersion

X72 Intentional self-harm by handgun discharge

X73 Intentional self-harm by rifle, shotgun and larger firearm discharge

X74 Intentional self-harm by other and unspecified firearm discharge

X75 Intentional self-harm by explosive material

X76 Intentional self-harm by smoke, fire and flames

X77 Intentional self-harm by steam, hot vapours and hot objects

X78 Intentional self-harm by sharp object

X79 Intentional self-harm by blunt object

X80 Intentional self-harm by jumping from a high place

X81 Intentional self-harm by jumping or lying before moving object

X82 Intentional self-harm by crashing of motor vehicle

X83 Intentional self-harm by other specified means

X84 Intentional self-harm by unspecified means

Y87.0 Late effects of intentional self-harm

OR

1  
2  
3  
4  
5  
6  
7  
8  
9  
10  
11  
12  
13  
14  
15  
16  
17  
18  
19  
20  
21  
22  
23  
24  
25  
26  
27  
28  
29  
30  
31  
32  
33  
34  
35  
36  
37  
38  
39  
40  
41  
42  
43  
44  
45  
46  
47  
48  
49  
50  
51  
52  
53  
54  
55  
56  
57  
58  
59  
60

## At least one READ code in:

|          |                                                              |         |                                                              |
|----------|--------------------------------------------------------------|---------|--------------------------------------------------------------|
| SL...15  | Overdose of drug                                             | U1A4.11 | [X]Accidental poisoning with antidepressant                  |
| T8...00  | Accidental poisoning by drugs, medicines and biologicals     | T952.00 | Accidental poisoning from other fish                         |
| T91z.00  | Accidental poisoning by household agents NOS                 | ZX1C.00 | Nipping self                                                 |
| U20...11 | [X]Deliberate drug overdose / other poisoning                | ZX17.00 | Head-banging                                                 |
| T8...11  | Cause of overdose - accidental                               | T938000 | Accidental poisoning by cyanides                             |
| 1BD1.00  | Suicidal ideation                                            | U20A000 | [X]Intent self pois organ solvent,halogen hydrocarb, home    |
| T803000  | Accidental poisoning by aspirin                              | TK7z.00 | Suicide+selfinflicted injury-jump from high place NOS        |
| TK05.00  | Suicide + selfinflicted poisoning by drug or medicine NOS    | T964200 | Accidental poisoning by cadmium and its compounds            |
| T921300  | Accidental poisoning by kerosene                             | ZX1B200 | Jumping from bridge                                          |
| TK...15  | Attempted suicide                                            | T953z00 | Accidental poisoning from berries or seeds NOS               |
| T930.00  | Accidental poisoning by organochlorine insecticides          | T80y.00 | Accidental poisoning by oth analgesics,antipyretic,antirheum |
| U1A..12  | [X]Accidental drug overdose / other poisoning                | TKx0000 | Suicide + selfinflicted injury-jumping before moving object  |
| TK...17  | Para-suicide                                                 | U209z00 | [X]Intent self poison alcohol unspecif place                 |
| TK...12  | Injury - self-inflicted                                      | T930500 | Accidental poisoning by toxaphene                            |
| U2...13  | [X]Suicide                                                   | ZX11400 | Biting own arm                                               |
| 1BD3.00  | Suicidal plans                                               | T954.00 | Accidental poisoning from other plants                       |
| T924z00  | Accidental poisoning by other solvents NOS                   | T820.00 | Accidental poisoning by chloral hydrate                      |
| T81..00  | Accidental poisoning by barbiturates                         | U221.00 | [X]Intent self harm by drowning/submersn occ resid instit'n  |
| T804100  | Accidental poisoning by paracetamol                          | T935200 | Accidental poisoning by chlorates                            |
| U2E..00  | [X]Self mutilation                                           | T930100 | Accidental poisoning by chlordane                            |
| 1BD4.00  | Suicide risk                                                 | U1A0z00 | [X]Accid poison/expos to nonopioid analgesic unspecif place  |
| TK3y.00  | Suicide + selfinflicted inj oth mean hang/strangle/suffocate | U204.13 | [X]Overdose - SSRI                                           |
| TK...11  | Cause of overdose - deliberate                               | T951.00 | Accidental poisoning from shellfish                          |
| 146B.00  | H/O: deliberate self harm                                    | U2A1.00 | [X]Intent self harm by blunt object occ resident instit'n    |
| U2...15  | [X]Para-suicide                                              | T903300 | Accidental poisoning by secondary propyl alcohol             |
| 1B19.11  | Suicidal - symptom                                           | TK3z.00 | Suicide + selfinflicted inj by hang/strangle/suffocate NOS   |
| TK60111  | Slashed wrists self inflicted                                | T854.00 | Accidental poisoning by anticholinergics                     |
| ZX1..13  | Deliberate self-harm                                         | TK72.00 | Suicide+selfinflicted injury-jump from natural sites         |
| U209.00  | [X]Intent self poison/exposure to alcohol                    | U2zz.00 | [X]Intent self harm by unspecif means occ at unspecif place  |
| ZX...00  | Self-harm                                                    | U1A9z00 | [X]Accid poison/expos to alcohol unspecif place              |
| T99y000  | Accidental poisoning by chlorine                             | U409z00 | [X]Pois/expos ?intent to alcohol unspecif place              |
| TK...13  | Poisoning - self-inflicted                                   | T83yz00 | Accidental poisoning by other tranquillisers NOS             |
| U2...11  | [X]Self inflicted injury                                     | T842100 | Accidental poisoning by caffeine                             |
| 146A.00  | H/O: attempted suicide                                       | T806300 | Accidental poisoning by ibuprofen                            |
| TK60100  | Self inflicted lacerations to wrist                          | U408z00 | [X]Pois/expos ?intent to oth/unsp drug/medic unspecif place  |

|         |                                                              |         |                                                              |
|---------|--------------------------------------------------------------|---------|--------------------------------------------------------------|
| ZX17100 | Banging own head against object                              | U20y200 | [X]Int self poison unspecif chemical school/pub admin area   |
| SL...14 | Overdose of biological substance                             | U1A2.00 | [X]Accident poisoning/exposure to sedative hypnotic          |
| 1BDC.00 | Intent of deliberate self harm with detailed plans           | TK70.00 | Suicide+selfinflicted injury-jump from residential premises  |
| ZX16211 | Poking own eyes                                              | TK2..00 | Suicide + selfinflicted poisoning by other gases and vapours |
| ZX13.00 | Cutting self                                                 | T840200 | Accidental poisoning by monoamine oxidase inhibitors         |
| 1BDA.00 | Thoughts of deliberate self harm                             | T93z.00 | Accidental poisoning agricultural chemical preparations NOS  |
| ZX14200 | Pulling out sutures                                          | T832z00 | Accidental poisoning- benzodiazepine-based tranquilliser NOS |
| TK30.00 | Suicide and selfinflicted injury by hanging                  | T932.00 | Accidental poisoning by carbamates                           |
| 14K0.00 | H/O: repeated overdose                                       | TN04.00 | Injury ?accidental, poisoning by other spec drug/medicament  |
| T967.00 | Accidental poisoning by cosmetics                            | ZX1K.00 | Self-incineration                                            |
| TK00.00 | Suicide + selfinflicted poisoning by analgesic/antipyretic   | U40y400 | [X]Pois/expos ?intent unspecif chemical in street/highway    |
| TK60.00 | Suicide and selfinflicted injury by cutting                  | U40B400 | [X]Pois/expos ?intent other gas/vapour in street/highway     |
| 1B19.00 | Suicidal                                                     | T993000 | Accidental poisoning by bromobenzyl cyanide                  |
| T901.00 | Accidental poisoning by other ethyl alcohol and its products | T832100 | Accidental poisoning by diazepam                             |
| T9...00 | Accidental poisoning by other non-drug substances            | U405.00 | [X]Poisoning/exposure, ? intent, to narcotic drug            |
| TK01.00 | Suicide + selfinflicted poisoning by barbiturates            | U208000 | [X]Int self poison/exposure to oth/unsp drug/medicam home    |
| 14K..00 | H/O: poisoning                                               | T840.00 | Accidental poisoning by antidepressants                      |
| U30..11 | [X]Deliberate drug poisoning                                 | U1Ayy00 | [X]Accid pois/expos to unspecif chemical other spec place    |
| U2...00 | [X]Intentional self-harm                                     | T971.00 | Accidental poisoning by coal gas NOS                         |
| U2...14 | [X]Attempted suicide                                         | T99yz00 | Accidental poisoning by other gases and vapours NOS          |
| T955.00 | Accidental poisoning from mushrooms and other fungi          | U2A..00 | [X]Intentional self harm by blunt object                     |
| T80..00 | Accidental poisoning by analgesics,antipyretic,antirheumatic | T840000 | Accidental poisoning by amitriptyline                        |
| T88..00 | Accidental poisoning by other drugs                          | T805.00 | Accidental poisoning by pyrazole derivatives                 |
| T8z..00 | Accidental poisoning by drugs NOS                            | U2C4.00 | [X]Int self harm jump/lying befr mov obje occ street/highway |
| T840z00 | Accidental poisoning by antidepressants NOS                  | U274.00 | [X]Intent self harm by smoke fire/flame occ street/highway   |
| U1AB.11 | [X]Accidental carbon monoxide poisoning                      | U400.00 | [X]Poisoning/exposure, ? intent, to nonopioid analgesic      |
| T90..00 | Accidental poisoning by alcohol, NEC                         | U1ADz00 | [X]Acc poison by and exposure to amphetamine - unspec places |
| U200.11 | [X]Overdose - paracetamol                                    | T825.00 | Accidental poisoning by mixed sedatives NEC                  |
| 1BD8.00 | At risk of DSH - deliberate self harm                        | U1A9000 | [X]Accident poison/exposure to alcohol at home               |
| ZX13100 | Cutting own wrists                                           | T832500 | Accidental poisoning by nitrazepam                           |
| ZX1P.00 | Swallowing substances                                        | U1A2.13 | [X]Accidental poisoning with temazepam                       |
| ZX1I.00 | Self-scalding                                                | T83y.00 | Accidental poisoning by other tranquillisers                 |
| T91..00 | Accidental poisoning by household agents                     | U4A5.00 | [X]Contct wth blunt obj undet intent occ trade/service area  |

|    |         |                                                              |         |                                                              |
|----|---------|--------------------------------------------------------------|---------|--------------------------------------------------------------|
| 1  | T921200 | Accidental poisoning by petrol                               | TN0..00 | Injury ?accidental, poisoning by solid/liquid substances     |
| 2  | U2...12 | [X]Injury - self-inflicted                                   | T912.00 | Accidental poisoning by polishes                             |
| 3  | U200z00 | [X]Intent self poison nonopioid analgesic unspecif place     | T916z00 | Accidental poisoning by paint or varnish NOS                 |
| 4  |         |                                                              |         |                                                              |
| 5  | U1A..11 | [X]Accidental drug / other poisoning                         | U1A9400 | [X]Accid poison/expos alcohol in street/highway              |
| 6  |         |                                                              |         |                                                              |
| 7  | TK...14 | Suicide and self harm                                        | TN07.00 | Injury ?accidental, poisoning by agricultural chemicals      |
| 8  |         |                                                              |         |                                                              |
| 9  | TK...00 | Suicide and selfinflicted injury                             | T980100 | Accidental poisoning by butane                               |
| 10 | U200.00 | [X]Intent self poison/exposure to nonopioid analgesic        | ZX1L600 | Self-mutilation of ears                                      |
| 11 |         |                                                              |         |                                                              |
| 12 | T910.00 | Accidental poisoning by synthetic detergents and shampoos    | ZX1L500 | Enucleation of own eyes                                      |
| 13 |         |                                                              |         |                                                              |
| 14 | ZV1B200 | [V]Personal history of self-harm                             | ZX1K.11 | Setting fire to self                                         |
| 15 | TK04.00 | Suicide + selfinflicted poisoning by other drugs/medicines   | T964000 | Accidental poisoning by beryllium and its compounds          |
| 16 |         |                                                              |         |                                                              |
| 17 | ZX11.00 | Biting self                                                  | ZX1E.00 | Pinching self                                                |
| 18 | U1Ay.00 | [X]Accident poisoning/exposure to unspecif chemical          | U20Bz00 | [X]Intent self poison other gas/vapour unspecif place        |
| 19 |         |                                                              |         |                                                              |
| 20 | TK3..00 | Suicide + selfinflicted injury by hang/strangulate/suffocate | T920z00 | Accidental poisoning by petrol solvents NOS                  |
| 21 |         |                                                              |         |                                                              |
| 22 | T935.00 | Accidental poisoning by herbicides                           | U211.00 | [X]Intent self harm by hangng strangult/suffoct resid instit |
| 23 |         |                                                              |         |                                                              |
| 24 | T913z00 | Accidental poisoning by other cleaning agents NOS            | T965100 | Accidental poisoning by fertilisers                          |
| 25 |         |                                                              |         |                                                              |
| 26 | T884.00 | Accidental poisoning by gastrointestinal system drugs        | U1A3.00 | [X]Accident poisoning/exposure to antiparkinson drug         |
| 27 |         |                                                              |         |                                                              |
| 28 | T96y.00 | Accidental poisoning by other solid and liquid substances OS | T983z00 | Accidental poisoning by carbon monoxide - domestic fuel NOS  |
| 29 |         |                                                              |         |                                                              |
| 30 | TK7..00 | Suicide and selfinflicted injury by jumping from high place  | TKx5.00 | Suicide and selfinflicted injury by crashing motor vehicle   |
| 31 |         |                                                              |         |                                                              |
| 32 | U40..00 | [X]Poisoning/expos to noxious substance,undetermined intent  | T822000 | Accidental poisoning by bromides                             |
| 33 |         |                                                              |         |                                                              |
| 34 | U20A.11 | [X]Self poisoning from glue solvent                          | T930300 | Accidental poisoning by dieldrin                             |
| 35 | T970.00 | Accidental poisoning by carbon monoxide from piped gas       | T938.00 | Accidental poisoning by fumigants                            |
| 36 |         |                                                              |         |                                                              |
| 37 | U27..00 | [X]Intentional self harm by smoke, fire and flames           | U1A6.00 | [X]Accident poisoning/exposure to hallucinogen               |
| 38 |         |                                                              |         |                                                              |
| 39 | U20B.11 | [X]Self carbon monoxide poisoning                            | U40A300 | [X]Pois/exp ?intent org solvent,halogen hydrocarb,sport area |
| 40 |         |                                                              |         |                                                              |
| 41 | T95..00 | Accidental poisoning from foodstuffs and poisonous plants    | ZX1L811 | Snapping own bones                                           |
| 42 |         |                                                              |         |                                                              |
| 43 | U1A..00 | [X]Accidental poisoning by + exposure to noxious substances  | TK54.00 | Suicide and selfinflicted injury by other firearm            |
| 44 |         |                                                              |         |                                                              |
| 45 | ZX11200 | Biting own fingers                                           | T961000 | Accidental poisoning by mercury, unspecified                 |
| 46 | ZX11500 | Biting own tongue                                            | TK6z.00 | Suicide and selfinflicted injury by cutting and stabbing NOS |
| 47 |         |                                                              |         |                                                              |
| 48 | TN...11 | Poisoning undetermined - accidentally or purposely inflicted | U4C..00 | [X]Falling lying running befor/into moving obj undet intent  |
| 49 |         |                                                              |         |                                                              |
| 50 | ZX19.00 | Hitting self                                                 | T843100 | Accidental poisoning by opiate antagonists                   |
| 51 | ZX1G.00 | Scratches self                                               | TN21.00 | Injury ?accidental, poisoning by other carbon monoxide       |
| 52 |         |                                                              |         |                                                              |
| 53 | 1BD7.00 | Low suicide risk                                             | T921z00 | Accidental poisoning by petrol fuel or cleaner NOS           |
| 54 |         |                                                              |         |                                                              |
| 55 | T911.00 | Accidental poisoning by soap products                        | U1AD000 | [X]Accident poisoning by and exposure to                     |
| 56 |         |                                                              |         |                                                              |
| 57 |         |                                                              |         |                                                              |
| 58 |         |                                                              |         |                                                              |
| 59 |         |                                                              |         |                                                              |
| 60 |         |                                                              |         |                                                              |

|    |         |                                                              |         |                                                                            |
|----|---------|--------------------------------------------------------------|---------|----------------------------------------------------------------------------|
| 1  | U29..00 | [X]Intentional self harm by sharp object                     | U1A5000 | amphetamine - home<br>[X]Accident poison/exposure to narcotic drug at home |
| 2  |         |                                                              |         |                                                                            |
| 3  | TK61.00 | Suicide and selfinflicted injury by stabbing                 | U201.00 | [X]Intent self poison/exposure to antiepileptic                            |
| 4  | TK03.00 | Suicide + selfinflicted poisoning                            | TKxy.00 | Suicide and selfinflicted injury by other specified means                  |
| 5  |         | tranquilliser/psychotropic                                   |         |                                                                            |
| 6  | T842000 | Accidental poisoning by amphetamine                          | TK01000 | Suicide and self inflicted injury by Amylobarbitone                        |
| 7  |         |                                                              |         |                                                                            |
| 8  | U20..00 | [X]Intentional self poisoning/exposure to noxious substances | U201z00 | [X]Intent self poison antiepileptic unspecif place                         |
| 9  |         |                                                              |         |                                                                            |
| 10 | U40y.00 | [X]Poisoning/exposure, ? intent, to unspecif chemical        | U204z00 | [X]Intent self poison psychotropic drug unspecif place                     |
| 11 |         |                                                              |         |                                                                            |
| 12 | T953000 | Accidental poisoning from berries                            | T936000 | Accidental poisoning by organic mercurials                                 |
| 13 | TK07.00 | Suicide + selfinflicted poisoning by corrosive/caustic subst | U1A7z00 | [X]Accid poison/expos to oth autonomic drug unspecif place                 |
| 14 |         |                                                              |         |                                                                            |
| 15 | T913.00 | Accidental poisoning by other cleaning agents                | TK0z.00 | Suicide + selfinflicted poisoning by solid/liquid subst NOS                |
| 16 |         |                                                              |         |                                                                            |
| 17 | TK51.00 | Suicide and selfinflicted injury by shotgun                  | U207z00 | [X]Intent self poison oth autonomic drug unspecif place                    |
| 18 |         |                                                              |         |                                                                            |
| 19 | U45..00 | [X]Other+unspecified firearm discharge undetermined intent   | T83z.00 | Accidental poisoning by tranquilisers NOS                                  |
| 20 |         |                                                              |         |                                                                            |
| 21 | ZX1LD00 | [X]Self mutilation                                           | U402.00 | [X]Poisoning/exposure, ? intent, to sedative hypnotic                      |
| 22 |         |                                                              |         |                                                                            |
| 23 | ZX1..14 | Self-abusive behaviour                                       | T84z.00 | Accidental poisoning by psychotropic agents NOS                            |
| 24 |         |                                                              |         |                                                                            |
| 25 | ZX18.00 | Hanging self                                                 | T96..00 | Accidental poisoning by other solid and liquid substances                  |
| 26 |         |                                                              |         |                                                                            |
| 27 | U205.11 | [X]Overdose - heroin                                         | U1AA000 | [X]Accid poison/expos organ solvent,halogen hydrocarb, home                |
| 28 |         |                                                              |         |                                                                            |
| 29 | T938200 | Accidental poisoning by phosphine                            | U40B.00 | [X]Poisoning/exposure, ? intent, to other gas/vapour                       |
| 30 |         |                                                              |         |                                                                            |
| 31 | U200.13 | [X]Overdose - aspirin                                        | U1AC.12 | [X]Accidental poisoning with paraquat                                      |
| 32 | U409.00 | [X]Poisoning/exposure, ? intent, to alcohol                  | U1Ay600 | [X]Acc pois/expos unspecif chemical indust/construct area                  |
| 33 |         |                                                              |         |                                                                            |
| 34 | T955000 | Accidental poisoning from mushrooms                          | TK5..00 | Suicide and selfinflicted injury by firearms and explosives                |
| 35 |         |                                                              |         |                                                                            |
| 36 | U290.00 | [X]Intentional self harm by sharp object occurrence at home  | TN20.00 | Injury ?accidental, poisoning by motor vehicle exhaust gas                 |
| 37 |         |                                                              |         |                                                                            |
| 38 | TK0..00 | Suicide + selfinflicted poisoning by solid/liquid substances | T921.00 | Accidental poisoning by petrol fuels and cleaners                          |
| 39 |         |                                                              |         |                                                                            |
| 40 | U21..00 | [X]Intent self harm by hanging strangulation / suffocation   | U4A3.00 | [X]Contct wth blunt obj undet intent occ sport/athletic area               |
| 41 |         |                                                              |         |                                                                            |
| 42 | ZX1H100 | Self-strangulation                                           | T831000 | Accidental poisoning by haloperidol                                        |
| 43 | T916200 | Accidental poisoning by non-lead paints                      | U280.00 | [X]Intent self harm by steam hot vapour/hot obj occ at home                |
| 44 |         |                                                              |         |                                                                            |
| 45 | U1A9.00 | [X]Accident poisoning/exposure to alcohol                    | U2y0.00 | [X]Intentionl self harm by oth specif means occurrn at home                |
| 46 |         |                                                              |         |                                                                            |
| 47 | T935500 | Accidental poisoning by paraquat                             | T935z00 | Accidental poisoning by herbicides NOS                                     |
| 48 | TN1..00 | Injury ?accidental, poisoning by gases in domestic use       | T80yz00 | Accidental poisoning-oth analgesic,antipyretic,antirheum NOS               |
| 49 |         |                                                              |         |                                                                            |
| 50 | TK4..00 | Suicide and selfinflicted injury by drowning                 | U241.00 | [X]Int self harm rifl s'gun/lrg frarm disch occ resid instit               |
| 51 |         |                                                              |         |                                                                            |
| 52 | ZX1L.00 | Self-mutilation                                              | T955z00 | Accidental poisoning from mushrooms and fungi NOS                          |
| 53 |         |                                                              |         |                                                                            |
| 54 | ZX19300 | Head-hitting                                                 | U406y00 | [X]Pois/exp ?intent to hallucinogen other spec place                       |
| 55 |         |                                                              |         |                                                                            |
| 56 |         |                                                              |         |                                                                            |
| 57 |         |                                                              |         |                                                                            |
| 58 |         |                                                              |         |                                                                            |
| 59 |         |                                                              |         |                                                                            |
| 60 |         |                                                              |         |                                                                            |

|    |         |                                                              |         |                                                              |
|----|---------|--------------------------------------------------------------|---------|--------------------------------------------------------------|
| 1  | ZX1..11 | Self-destructive behaviour                                   | T935400 | Accidental poisoning by mixtures herbicides+plant food etc   |
| 2  | T92..00 | Accidental poisoning by petrol products                      | U4D3.00 | [X]Crash of motor vehicle undeterm intent sport/athlet area  |
| 3  |         |                                                              |         |                                                              |
| 4  | TK02.00 | Suicide + selfinflicted poisoning by oth sedatives/hypnotics | T82y.00 | Accidental poisoning by other sedatives and hypnotics OS     |
| 5  |         |                                                              |         |                                                              |
| 6  | T914.00 | Accidental poisoning by disinfectants                        | U20C.12 | [X]Self poisoning with paraquat                              |
| 7  | T88yz00 | Accidental poisoning by other drugs NOS                      | T940.00 | Accidental poisoning by corrosive aromatics                  |
| 8  | T961.00 | Accidental poisoning by mercury and its compounds and fumes  | TN05.00 | Injury ?accidental, poisoning by drug or medicament NOS      |
| 9  |         |                                                              |         |                                                              |
| 10 |         |                                                              |         |                                                              |
| 11 | T9z..00 | Accidental poisoning NOS                                     | T802.00 | Accidental poisoning by other opiates                        |
| 12 | T85..00 | Accidental poisoning by other drugs acting on nervous system | T841.00 | Accidental poisoning by hallucinogens                        |
| 13 |         |                                                              |         |                                                              |
| 14 | T883.00 | Accidental poisoning by cardiovascular system drugs          | U1A2.12 | [X]Accidental poisoning with diazepam                        |
| 15 |         |                                                              |         |                                                              |
| 16 | U2z..00 | [X]Intentional self harm by unspecified means                | U2A0.00 | [X]Intentional self harm by blunt object occurrence at home  |
| 17 |         |                                                              |         |                                                              |
| 18 | U1AA.11 | [X]Accidental poisoning from glue solvent                    | U208z00 | [X]Intent self poison oth/unsp drug/medic unspecif place     |
| 19 |         |                                                              |         |                                                              |
| 20 | T886.00 | Accidental poisoning by muscle + respiratory system drugs    | T991.00 | Accidental poisoning by sulphur dioxide                      |
| 21 |         |                                                              |         |                                                              |
| 22 | U204.12 | [X]Overdose - amitriptyline                                  | U409000 | [X]Poison/exposure ?intent, to alcohol at home               |
| 23 |         |                                                              |         |                                                              |
| 24 | T923000 | Accidental poisoning by paraffin wax                         | T99..00 | Accidental poisoning by other gases and vapours              |
| 25 |         |                                                              |         |                                                              |
| 26 | T902000 | Accidental poisoning by methanol                             | T850.00 | Accidental poisoning by anticonvulsant + anti-parkinson drug |
| 27 |         |                                                              |         |                                                              |
| 28 | ZX10.00 | Swallowing objects                                           | T850.11 | Accidental poisoning by anticonvulsant                       |
| 29 | ZX1L100 | Self-mutilation of hands                                     | U205z00 | [X]Intent self poison narcotic drug unspecif place           |
| 30 |         |                                                              |         |                                                              |
| 31 | ZX1..00 | Self-injurious behaviour                                     | U202z00 | [X]Intent self poison sedative hypnotic unspecif place       |
| 32 |         |                                                              |         |                                                              |
| 33 |         |                                                              |         |                                                              |
| 34 | 1BD5.00 | High suicide risk                                            | U207.00 | [X]Intent self poison/exposure to oth autonomic drug         |
| 35 |         |                                                              |         |                                                              |
| 36 | ZX1LA00 | Removing own nails                                           | U20C.00 | [X]Intent self poison/exposure to pesticide                  |
| 37 | ZX11100 | Biting own hand                                              | T964700 | Accidental poisoning by thallium compounds                   |
| 38 | ZX11300 | Biting own toes                                              | U40y600 | [X]Poison/expos ?intent unspec chemic indust/construct area  |
| 39 |         |                                                              |         |                                                              |
| 40 | U4D0.00 | [X]Crashng of motor vehicle undetermined intent occ at home  | T95y.00 | Accidental poisoning by other foods                          |
| 41 |         |                                                              |         |                                                              |
| 42 | T800.11 | Accidental poisoning by diamorphine                          | T88y000 | Accidental poisoning by central appetite depressants         |
| 43 |         |                                                              |         |                                                              |
| 44 | U2D4.00 | [X]Intent self harm by crash motor vehicl occ street/highway | T961z00 | Accidental poisoning by mercury, NOS                         |
| 45 |         |                                                              |         |                                                              |
| 46 | U208.00 | [X]Int self poison/exposure to other/unspec drug/medicament  | U1A8y00 | [X]Accid pois/expos to oth/unsp drug/medic other spec place  |
| 47 |         |                                                              |         |                                                              |
| 48 | T887000 | Accidental poisoning by skin drugs                           | ZX1K.12 | Setting self alight                                          |
| 49 | TKx2.00 | Suicide and selfinflicted injury by scald                    | U720.00 | [X]Sequelae of intentional self-harm                         |
| 50 | U4B..00 | [X]Falling jumping/pushed from high place undeterm intent    | U2yz.00 | [X]Intent self harm by oth specif means occ unspecif place   |
| 51 |         |                                                              |         |                                                              |
| 52 | TK6..00 | Suicide and selfinflicted injury by cutting and stabbing     | U202y00 | [X]Int self poison sedative hypnotic other spec place        |
| 53 |         |                                                              |         |                                                              |
| 54 | T86..00 | Accidental poisoning by antibiotics                          | U404300 | [X]Pois/exp ?intent psychotropic drug in sport/athletic area |
| 55 |         |                                                              |         |                                                              |
| 56 |         |                                                              |         |                                                              |
| 57 | T98..00 | Accidental poisoning by other utility gas + carbon monoxide  | T802z00 | Accidental poisoning by other opiates NOS                    |
| 58 |         |                                                              |         |                                                              |
| 59 |         |                                                              |         |                                                              |



|    |         |                                                             |         |                                                              |
|----|---------|-------------------------------------------------------------|---------|--------------------------------------------------------------|
| 1  | U204.00 | [X]Intent self poison/exposure to psychotropic drug         | U409200 | [X]Pois/exp ?intent alcohol school/pub admin area            |
| 2  | ZX13.11 | Cuts self                                                   | U1Ayz00 | [X]Accid poison/expos to unspecif chemical unspecif place    |
| 3  |         |                                                             | T950.00 | Accidental poisoning from meat                               |
| 4  | T966000 | Accidental poisoning by glues                               | U1A1.00 | [X]Accident poisoning/exposure to antiepileptic              |
| 5  | ZX14100 | Reopening scars                                             | T913000 | Accidental poisoning by scouring agents                      |
| 6  |         |                                                             | TK10.00 | Suicide + selfinflicted poisoning by gas via pipeline        |
| 7  | T901100 | Accidental poisoning by methylated spirit                   | TN08.00 | Injury ?accidental, poisoning by arsenic or its compounds    |
| 8  | T935300 | Accidental poisoning by diquat                              | T966y00 | Accidental poisoning by other adhesives                      |
| 9  |         |                                                             | U205y00 | [X]Int self poison narcotic drug other spec place            |
| 10 | T902.00 | Accidental poisoning by methyl alcohol                      | TK1..00 | Suicide + selfinflicted poisoning by gases in domestic use   |
| 11 |         |                                                             | U20A400 | [X]Int self poison org solvent,halogen hydrocarb,in highway  |
| 12 | 1BD6.00 | Moderate suicide risk                                       | T803z00 | Accidental poisoning by salicylates NOS                      |
| 13 | T83..00 | Accidental poisoning by tranquilisers                       | U1A2000 | [X]Accident poison/exposure to sedative hypnotic at home     |
| 14 |         |                                                             | T931300 | Accidental poisoning by malathion                            |
| 15 | U1AB.00 | [X]Accident poisoning/exposure to other gas/vapour          | TKx0.00 | Suicide + selfinflicted injury-jump/lie before moving object |
| 16 | T942z00 | Accidental poisoning by caustic alkalis NOS                 | TN1z.00 | Injury ?accidental, poisoning by gas in domestic use NOS     |
| 17 |         |                                                             | T85z.00 | Accidental poisoning by drugs acting on nervous system NOS   |
| 18 | T841000 | Accidental poisoning by cannabis derivatives                | TKx4.00 | Suicide and selfinflicted injury by electrocution            |
| 19 | ZX12.00 | Burning self                                                | T807.00 | Accidental poisoning by other non-narcotic analgesics        |
| 20 |         |                                                             | TK11.00 | Suicide + selfinflicted poisoning by liquified petrol gas    |
| 21 | U27z.00 | [X]Intent self harm by smoke fire/flames occ unspecif place | TN0z.00 | Injury ?accidental, poisoning by solid or liquid subst NOS   |
| 22 | T901300 | Accidental poisoning by ethanol, NOS                        | ZX...11 | Self-damage                                                  |
| 23 |         |                                                             | TKxz.00 | Suicide and selfinflicted injury by other means NOS          |
| 24 | T88z.00 | Accidental poisoning by unspecified drugs                   | T806.00 | Accidental poisoning by antirheumatics                       |
| 25 | ZX11600 | Biting sides of own cheeks                                  | T964600 | Accidental poisoning by nickel compounds                     |
| 26 |         |                                                             | T813.00 | Accidental poisoning by pentobarbitone                       |
| 27 | T88y.00 | Accidental poisoning by other drugs OS                      | T806z00 | Accidental poisoning by antirheumatics NOS                   |
| 28 | T937300 | Accidental poisoning by warfarin                            | ZX19100 | Punching self                                                |
| 29 |         |                                                             | U2B0.00 | [X]Intent self harm by jumping from high place occ at home   |
| 30 | U20B200 | [X]Int self poison other gas/vapour school/pub admin area   | U270.00 | [X]Intention self harm by smoke fire/flames occurrn at home  |
| 31 | U2y..00 | [X]Intentional self harm by other specified means           | U206400 | [X]Intent self pois hallucinogen in street/highway           |
| 32 |         |                                                             | C110100 | Self-induced hyperinsulinism                                 |
| 33 | T973.00 | Accidental poisoning by piped natural gas                   | T916000 | Accidental poisoning by lacquers                             |
| 34 | T93..00 | Accidental poisoning by agricultural chemical preparations  | T850z00 | Accidental poisoning by anticonvulsant/anti-                 |
| 35 | ZX13200 | Cutting own throat                                          |         |                                                              |
| 36 | T806100 | Accidental poisoning by indomethacin                        |         |                                                              |
| 37 | ZX1A.00 | Inserting foreign bodies into own orifices                  |         |                                                              |
| 38 | T924.00 | Accidental poisoning by other solvents                      |         |                                                              |
| 39 | T97..00 | Accidental poisoning by gas distributed by pipeline         |         |                                                              |
| 40 | ZX14300 | Poking fingers into wound                                   |         |                                                              |
| 41 |         |                                                             |         |                                                              |
| 42 | ZX11111 | Hand biting                                                 |         |                                                              |
| 43 |         |                                                             |         |                                                              |
| 44 | T802200 | Accidental poisoning by morphine                            |         |                                                              |
| 45 |         |                                                             |         |                                                              |
| 46 | T881.00 | Accidental poisoning by primarily systemic agents           |         |                                                              |
| 47 | U41..00 | [X]Hanging strangulation + suffocation undetermined intent  |         |                                                              |
| 48 |         |                                                             |         |                                                              |
| 49 | T900.00 | Accidental poisoning by alcoholic beverages                 |         |                                                              |
| 50 |         |                                                             |         |                                                              |
| 51 |         |                                                             |         |                                                              |
| 52 |         |                                                             |         |                                                              |
| 53 |         |                                                             |         |                                                              |
| 54 |         |                                                             |         |                                                              |
| 55 |         |                                                             |         |                                                              |
| 56 |         |                                                             |         |                                                              |
| 57 |         |                                                             |         |                                                              |
| 58 |         |                                                             |         |                                                              |
| 59 |         |                                                             |         |                                                              |

|    |         |                                                              |         |                                                               |
|----|---------|--------------------------------------------------------------|---------|---------------------------------------------------------------|
| 1  | ZV15600 | [V]Personal history of poisoning                             | T854000 | parkin drug NOS                                               |
| 2  | T98z.00 | Accidental poisoning by carbon monoxide NOS                  | T830200 | Accidental poisoning by atropine                              |
| 3  | TKz..00 | Suicide and selfinflicted injury NOS                         | T931z00 | Accidental poisoning by prochlorperazine                      |
| 4  |         |                                                              |         | Accidental poisoning by organophosphorus insecticides NOS     |
| 5  | ZX1B.00 | Jumping from height                                          | T964.00 | Accidental poisoning by other metals + compounds and fumes    |
| 6  |         |                                                              | U29y.00 | [X]Intention self harm by sharp object occ oth specif place   |
| 7  | U22..00 | [X]Intentional self harm by drowning and submersion          | T81z.00 | Accidental poisoning by barbiturates NOS                      |
| 8  | U209000 | [X]Int self poison/exposure to alcohol at home               | U28z.00 | [X]Intent self harm by steam hot vapour/obj occ unspec place  |
| 9  | U1AB600 | [X]Acc pois/expos other gas/vapour indust/construct area     | TK2z.00 | Suicide + selfinflicted poisoning by gases and vapours NOS    |
| 10 | U1ABz00 | [X]Accid poison/expos to other gas/vapour unspecif place     | U26..00 | [X]Intentional self harm by explosive material                |
| 11 | T916.00 | Accidental poisoning by other paints and varnishes           | U1A8100 | [X]Accid poison/expos to oth/unsp drug/medicam res institut   |
| 12 | U20yz00 | [X]Intent self poison unspecif chemical unspecif place       | T95z.00 | Accidental poisoning by foodstuffs and poisonous plants NOS   |
| 13 | U2C..00 | [X]Intent self harm by jumping / lying before moving object  | U207000 | [X]Int self poison/exposure to oth autonomic drug at home     |
| 14 | U2z0.00 | [X]Intentional self harm by unspecif means occurrn at home   | T936.00 | Accidental poisoning by fungicides                            |
| 15 | T981z00 | Accidental poisoning by utility gas NOS                      | U1A8z00 | [X]Accid poison/expos to oth/unsp drug/medic unspecif place   |
| 16 | U20A.00 | [X]Intentional self poison organ solvent,halogen hydrocarb   | U2Cy.00 | [X]Int self harm jump/lying bef mov obje occ oth specif plice |
| 17 | TKy..00 | Late effects of selfinflicted injury                         | T963100 | Accidental poisoning by arsenic compounds                     |
| 18 | U21z.00 | [X]Intent self harm by hangng strangul/suffoct unspecif plce | T903100 | Accidental poisoning by isopropanol                           |
| 19 | U1AD.00 | [X]Accidental poisoning by and exposure to amfetamine        | T855100 | Accidental poisoning by noradrenalin                          |
| 20 | T931.00 | Accidental poisoning by organophosphorus insecticides        | T932200 | Accidental poisoning by propoxur                              |
| 21 | U1A0000 | [X]Accident poison/exposure to nonopioid analgesic at home   | T932100 | Accidental poisoning by carbaryl                              |
| 22 | T98yz00 | Accidental poisoning by carbon monoxide from oth source NOS  | T963.00 | Accidental poisoning by arsenic and its compounds and fumes   |
| 23 | T92z.00 | Accidental poisoning by solvent NOS                          | T853.00 | Accidental poisoning by cholinergics                          |
| 24 | TK71.00 | Suicide+selfinflicted injury-jump from oth manmade structure | U2y1.00 | [X]Intent self harm by oth specif means occ resid instit'n    |
| 25 | T84..00 | Accidental poisoning by other psychotropic agents            | T98y200 | Accidental poisoning by CO - fuels in industrial use          |
| 26 | U40C.00 | [X]Poisoning/exposure, ? intent, to pesticide                | ZX1Q.11 | Jumping under train                                           |
| 27 | T915.00 | Accidental poisoning by lead paints                          | U20C.11 | [X]Self poisoning with weedkiller                             |
| 28 | U1AC.11 | [X]Accidental poisoning with weedkiller                      | T961200 | Accidental poisoning by mercury fumes                         |
| 29 | U4A..00 | [X]Contact with blunt object, undetermined intent            | ZX1H200 | Self-suffocation                                              |
| 30 | T937z00 | Accidental poisoning by rodenticides NOS                     | T916300 | Accidental poisoning by white washes                          |
| 31 | U204000 | [X]Int self poison/exposure to psychotropic drug at home     | ZX1L900 | Pulling own teeth out                                         |
| 32 | U202000 | [X]Int self poison/exposure to sedative hypnotic at home     | U294.00 | [X]Intention self harm by sharp object occ street/highway     |
| 33 | T96z.00 | Accidental poisoning by solid and liquid substances NOS      |         |                                                               |

|         |                                                                 |         |                                                                  |
|---------|-----------------------------------------------------------------|---------|------------------------------------------------------------------|
| T934.00 | Accidental poisoning by other insecticides                      | ZX1L300 | Self-mutilation of penis                                         |
| T953100 | Accidental poisoning from seeds                                 | U21y.00 | [X]Intent self harm by hangng strangul/suffocat<br>oth spec plce |
| U47..00 | [X]Exposure to smoke, fire and flames,<br>undetermined intent   | T815.00 | Accidental poisoning by quinalbarbitone                          |
| T832.00 | Accidental poisoning by benzodiazepine-based<br>tranquillisers  | U4D7.00 | [X]Crashng of motor vehicle undetermined<br>intent occ on farm   |
| T82..00 | Accidental poisoning by other sedatives and<br>hypnotics        | ZX1R.00 | Throwing self in front of vehicle                                |
| U200.12 | [X]Overdose - ibuprofen                                         | U1Ay200 | [X]Acc poison/expos unspecif chemical<br>school/pub admin area   |
| T920.00 | Accidental poisoning by petroleum solvents                      | U1A3500 | [X]Accid poison/expos antiparkinson drug<br>trade/service area   |
| ZX1B100 | Jumping from building                                           | U1A9500 | [X]Accid poison/expos alcohol trade/service<br>area              |
| U2D0.00 | [X]Intent self harm by crash of motor vehicl<br>occurrn at home | T832400 | Accidental poisoning by medazepam                                |
| ZX1F.00 | Rubbing own skin                                                | TN2..00 | Injury ?accidental, poisoning by other gases                     |
| T887300 | Accidental poisoning by otorhinolaryngological<br>drugs         | U410.00 | [X]Hanging strangulat+suffocat undet intent<br>occurrn at home   |
| T880.00 | Accidental poisoning by hormones and synthetic<br>substitutes   | T920200 | Accidental poisoning by petroleum naphtha                        |
| U1Ay000 | [X]Accident poison/exposure to unspecif<br>chemical at home     | T887z00 | Accidental poisoning by skin, eye, ENT and<br>dental drug NOS    |
| T885.00 | Accidental poisoning by water,mineral,uric acid<br>metab drugs  | U2C1.00 | [X]Int self harm jump/lying befr mov obje occ<br>resid instit'n  |
| U25..00 | [X]Intent self harm by other/unspecified firearm<br>discharge   | T921.12 | Accidental poisoning by petroleum fuels                          |
| U205.00 | [X]Intent self poison/exposure to narcotic drug                 | T940011 | Accidental poisoning by phenol                                   |
| U202.12 | [X]Overdose - diazepam                                          | U1AC000 | [X]Accident poison/exposure to pesticide at<br>home              |
| U72..00 | [X]Sequel intentn self-harm assault+event of<br>undeterm intent | TN11.00 | Injury ?accidental, poisoning by liquid petrol<br>gas            |
| ZX1LB00 | Eating own flesh                                                | U2Bz.00 | [X]Int self harm by jump from high place occ<br>unspecif place   |
| ZX17200 | Banging own head against own body parts                         | TK1z.00 | Suicide + selfinflicted poisoning by domestic<br>gases NOS       |
| T983100 | Accidental poisoning by CO- coke in domestic<br>stove/fireplace | T98y000 | Accidental poisoning by CO - blast furnace gas                   |
| U49..00 | [X]Contact with sharp object, undetermined<br>intent            | TK01400 | Suicide and self inflicted injury by<br>Phenobarbitone           |
| ZX15.00 | Drowning self                                                   | T85y.00 | Accid. poisoning by other drugs acting on<br>nervous system OS   |
| U204.11 | [X]Overdose - antidepressant                                    | U22y.00 | [X]Intent self harm by drown/submersn occ<br>oth specif place    |
| T814.00 | Accidental poisoning by phenobarbitone                          | U20Cy00 | [X]Int self poison pesticide other spec place                    |
| U1A2.11 | [X]Accidental poisoning with sleeping tablets                   | U206.00 | [X]Intent self poison/exposure to hallucinogen                   |
| TKx1.00 | Suicide and selfinflicted injury by burns or fire               | U202.18 | [X]Overdose - amobarbital                                        |
| U2B..00 | [X]Intentional self harm by jumping from a high<br>place        | T830000 | Accidental poisoning by chlorpromazine                           |
| T470.00 | Accidental poisoning by gases or fumes on ship                  | ZX16.00 | Gouging own body parts                                           |
| ZX1LC00 | Stripping own skin                                              | T807z00 | Accidental poisoning by non-narcotic<br>analgesics NOS           |
| ZRLfC12 | HoNOS item 2 - non-accidental self injury                       | T887400 | Accidental poisoning by dental drugs                             |
| ZX1L911 | Extracting own teeth                                            | U1Ay500 | [X]Accid poison/expos unspecif chemical<br>trade/service area    |

|    |         |                                                                 |         |                                                                |
|----|---------|-----------------------------------------------------------------|---------|----------------------------------------------------------------|
| 1  | 1BDB.00 | Plans for deliberate self harm without intent                   | T966.00 | Accidental poisoning by glues and adhesives                    |
| 2  | ZX11.11 | Bites self                                                      | ZX1B300 | Jumping from cliff                                             |
| 3  | U1A2.15 | [X]Accidental poisoning with nitrazepam                         | U2B6.00 | [X]Int self harm by jump from high place<br>indust/constr area |
| 4  | TKx..00 | Suicide and selfinflicted injury by other means                 | U250.00 | [X]Intent self harm oth/unspecif firearm disch<br>occ at home  |
| 5  | TH02.00 | Late effects of accidental poisoning                            | ZX1L700 | Self-inducing a prolapse                                       |
| 6  | ZX1..12 | SIB - Self-injurious behaviour                                  | T852100 | Accidental poisoning by lignocaine                             |
| 7  | T937200 | Accidental poisoning by thallium                                | U1A5z00 | [X]Accid poison/expos to narcotic drug<br>unspecif place       |
| 8  | T981400 | Accidental poisoning by cooking gas NOS                         | U409400 | [X]Pois/expos ?intent alcohol in<br>street/highway             |
| 9  | T921100 | Accidental poisoning by gas oils                                | U2zy.00 | [X]Intent self harm by unspecif means occ oth<br>specif place  |
| 10 | T965000 | Accidental poisoning by plant food                              | ZX1L800 | Breaking own bones                                             |
| 11 | U202.16 | [X]Overdose - benzodiazepine                                    | TKx7.00 | Suicide and selfinflicted injury caustic subst,<br>excl poison |
| 12 | ZX1N.00 | Stabbing self                                                   | U200y00 | [X]Int self poison nonopioid analgesic other<br>spec place     |
| 13 | T803.00 | Accidental poisoning by salicylates                             | U204y00 | [X]Int self poison psychotropic drug other spec<br>place       |
| 14 | TK20.00 | Suicide + selfinflicted poisoning by motor veh<br>exhaust gas   | T852.00 | Accidental poisoning by local anaesthetic                      |
| 15 | T99y.00 | Accidental poisoning by other gases and vapours<br>OS           | U408000 | [X]Poison/exposure ?intent, to oth/unsp<br>drug/medicam home   |
| 16 | U200000 | [X]Int self poison/exposure to nonopioid<br>analgesic at home   | U202400 | [X]Intent self pois sedative hypnotic in<br>street/highway     |
| 17 | U1A5.00 | [X]Accident poisoning/exposure to narcotic drug                 | U1ABy00 | [X]Accid pois/expos to other gas/vapour other<br>spec place    |
| 18 | TK1y.00 | Suicide and selfinflicted poisoning by other utility<br>gas     | U200500 | [X]Intent self pois nonopioid analgesic<br>trade/service area  |
| 19 | T953.00 | Accidental poisoning from berries and seeds                     | U208400 | [X]Intent self pois oth/unsp drug/medic in<br>street/highway   |
| 20 | U202.17 | [X]Overdose - barbiturate                                       | U200100 | [X]Intent self poison nonopioid analgesic at res<br>institut   |
| 21 | U1A0.11 | [X]Accidental poisoning with paracetamol                        | U20C000 | [X]Int self poison/exposure to pesticide at<br>home            |
| 22 | T955y00 | Accidental poisoning from other fungi                           | U402z00 | [X]Pois/expos ?intent to sedative hypnotic<br>unspecif place   |
| 23 | T852000 | Accidental poisoning by cocaine                                 | U208y00 | [X]Int self poison oth/unsp drug/medic other<br>spec place     |
| 24 | T942000 | Accidental poisoning by sodium hydroxide                        | U209y00 | [X]Int self poison alcohol other spec place                    |
| 25 | U1A0.00 | [X]Accident poisoning/exposure to nonopioid<br>analgesic        | U2z2.00 | [X]Intent self harm by unsp mean occ<br>sch/ins/pub adm area   |
| 26 | T941000 | Accidental poisoning by hydrochloric acid                       | ZX16100 | Gouging own flesh                                              |
| 27 | ZX1J.00 | Self-electrocution                                              | T841z00 | Accidental poisoning by hallucinogen NOS                       |
| 28 | T854200 | Accidental poisoning by hyoscine                                | T982z00 | Accidental poisoning by exhaust gas from<br>motor vehicle NOS  |
| 29 | TN00.00 | Injury ?accidental, poisoning by analgesic or anti-<br>pyretic  | T964500 | Accidental poisoning by manganese and its<br>compounds         |
| 30 | T80z.00 | Accidental poisoning by<br>analgesics,antipyretic,antirheum NOS | U404.00 | [X]Poisoning/exposure, ? intent, to<br>psychotropic drug       |
| 31 | ZX19200 | Slapping self                                                   | U22z.00 | [X]Intent self harm by drown/submersn occ<br>unspecified place |
| 32 | U1A7.00 | [X]Accident poisoning/exposure to oth autonomic<br>drug         | T94y.00 | Accidental poisoning by other corrosives and<br>caustics       |

|    |         |                                                              |         |                                                              |
|----|---------|--------------------------------------------------------------|---------|--------------------------------------------------------------|
| 1  | U1A0.12 | [X]Accidental poisoning with ibuprofen                       | U20Az00 | [X]Int self pois org solv,halogen hydrocarb, unspec place    |
| 2  | U408.00 | [X]Poison/exposure, ?intent, to other/unspec drug/medicament | ZV71600 | [V]Observation following other inflicted injury              |
| 3  | U48..00 | [X]Contact with steam hot vapours+objects undetermn intent   | T830z00 | Accidental poisoning- phenothiazine-based tranquilisers NOS  |
| 4  | T982100 | Accidental poisoning by exhaust gas from gas engine          | T924000 | Accidental poisoning by benzene                              |
| 5  | ZX15.00 | Throwing self onto floor                                     | ZVu0600 | [X]Examination & observat following other inflicted injury   |
| 6  | U24..00 | [X]Intent self harm by rifle shotgun/larger firearm disch    | TKx3.00 | Suicide and selfinflicted injury by extremes of cold         |
| 7  | T942.00 | Accidental poisoning by caustic alkalis                      | T964100 | Accidental poisoning by brass fumes                          |
| 8  | U202.00 | [X]Intent self poison/exposure to sedative hypnotic          | T960000 | Accidental poisoning by lead, unspecified                    |
| 9  | U20B.00 | [X]Intent self poison/exposure to other gas/vapour           | U40yz00 | [X]Pois/expos ?intent to unspecif chemical unspecif place    |
| 10 | TK21.00 | Suicide and selfinflicted poisoning by other carbon monoxide | T980200 | Accidental poisoning by propane                              |
| 11 | U1A5.11 | [X]Accidental poisoning with heroin                          | T983.00 | Accidental poisoning by carbon monoxide- other domestic fuel |
| 12 | U20y000 | [X]Int self poison/exposure to unspecif chemical at home     | U204100 | [X]Intent self poison psychotropic drug at res institut      |
| 13 | ZC15100 | Repeated self-induced vomiting                               | T964z00 | Accidental poisoning by metals + compounds and fumes NOS     |
| 14 | U202.13 | [X]Overdose - temazepam                                      | U1AA100 | [X]Acc poison/expos org solvent,halogen hydrocarb,res instit |
| 15 | T802000 | Accidental poisoning by codeine                              | ZX1Q.00 | Throwing self in front of train                              |
| 16 | T82z.00 | Accidental poisoning by sedatives and hypnotics NOS          | T851.00 | Accidental poisoning by oth central nervous syst depressants |
| 17 | T94..00 | Accidental poisoning by corrosives and caustics NEC          | T806200 | Accidental poisoning by naproxen                             |
| 18 | TK31.00 | Suicide + selfinflicted injury by suffocation by plastic bag | TK01100 | Suicide and self inflicted injury by Barbitone               |
| 19 | U1A4.13 | [X]Accidental poisoning with SSRI                            | T990.00 | Accidental poisoning by nitrogen oxides                      |
| 20 | T960.00 | Accidental poisoning by lead and its compounds and fumes     | T963000 | Accidental poisoning by arsenic, unspecified                 |
| 21 | U1AB700 | [X]Accident poison/exposure to other gas/vapour on farm      | 14K1.00 | Intentional overdose of prescription only medication         |
| 22 | T941.00 | Accidental poisoning by acids                                | U212.00 | [X]Inten slf harm hang strang/suffc sch oth ins/pub adm area |
| 23 | TN06.00 | Injury ?accidental, poisoning by corrosive/caustic substance | T802300 | Accidental poisoning by opium                                |
| 24 | U470.00 | [X]Exposure to smoke fire+flame undeterm intent occ at home  | U1AD200 | [X]Acc pois/expo to amphet - sch, other inst+pub admin area  |
| 25 | T981.00 | Accidental poisoning by other utility gas                    | T98y.00 | Accidental poisoning by carbon monoxide from other sources   |
| 26 | U4D..00 | [X]Crashing of motor vehicle, undetermined intent            | T802100 | Accidental poisoning by pethidine                            |
| 27 | U49z.00 | [X]Contact with sharp obj undeterm intent occ unspecif place | T983300 | Accidental poisoning by CO- kerosene in domestic stove/fire  |
| 28 | U42..00 | [X]Drowning and submersion, undetermined intent              | U4Bz.00 | [X]Fall jump/push frm high plce undt intnt occ unspecif plce |
| 29 | TK06.00 | Suicide + selfinflicted poisoning by agricultural chemical   | T850.12 | Accidental poisoning by anti-parkinsonism drug               |
| 30 | U40A.00 | [X]Pois/exposure,?intent,to organ                            | T98y100 | Accidental poisoning by CO - kiln vapour                     |

|    |         |                                                                                   |         |                                                               |
|----|---------|-----------------------------------------------------------------------------------|---------|---------------------------------------------------------------|
| 1  | U205000 | solvent,halogen hydrocarb<br>[X]Int self poison/exposure to narcotic drug at home | T830.00 | Accidental poisoning by phenothiazine-based tranquilisers     |
| 2  |         |                                                                                   |         |                                                               |
| 3  | U1AB000 | [X]Accident poison/exposure to other gas/vapour at home                           | U2By.00 | [X]Int self harm by jump from high place oth specif plce      |
| 4  |         |                                                                                   |         |                                                               |
| 5  | U29z.00 | [X]Intentional self harm by sharp object occ unspecif place                       | T941z00 | Accidental poisoning by acids NOS                             |
| 6  |         |                                                                                   |         |                                                               |
| 7  | U1A4100 | [X]Accid poison/expos to psychotropic drug at res institut                        | U1A2.16 | [X]Accidental poisoning with benzodiazepine                   |
| 8  |         |                                                                                   |         |                                                               |
| 9  | T832000 | Accidental poisoning by chlordiazepoxide                                          | T936z00 | Accidental poisoning by fungicides NOS                        |
| 10 | U291.00 | [X]Intent self harm by sharp object occ resident instit'n                         | TK5z.00 | Suicide and selfinflicted injury by firearms/explosives NOS   |
| 11 |         |                                                                                   |         |                                                               |
| 12 | U202.15 | [X]Overdose - nitrazepam                                                          | T930200 | Accidental poisoning by DDT                                   |
| 13 | U1A8000 | [X]Accident poison/exposure to oth/unsp drug/medicam home                         | U1A1000 | [X]Accident poison/exposure to antiepileptic at home          |
| 14 |         |                                                                                   |         |                                                               |
| 15 | U20B000 | [X]Int self poison/exposure to other gas/vapour at home                           | T811.00 | Accidental poisoning by barbitone                             |
| 16 |         |                                                                                   |         |                                                               |
| 17 | U1AC.00 | [X]Accident poisoning/exposure to pesticide                                       | T901z00 | Accidental poisoning by ethyl alcohol NOS                     |
| 18 | T882.00 | Accidental poisoning by drugs affecting blood constituents                        | U200400 | [X]Intent self pois nonopioid analgesic in street/highway     |
| 19 |         |                                                                                   |         |                                                               |
| 20 | T90y.00 | Accidental poisoning by other alcohols                                            | T923.00 | Accidental poisoning by petroleum solids                      |
| 21 | U201000 | [X]Int self poison/exposure to antiepileptic at home                              | TKx6.00 | Suicide and selfinflicted injury by crashing of aircraft      |
| 22 |         |                                                                                   |         |                                                               |
| 23 | ZX14.00 | Damaging own wounds                                                               | U2D6.00 | [X]Intent self harm crash motor vehic occ indust/constr area  |
| 24 |         |                                                                                   |         |                                                               |
| 25 | U2A3.00 | [X]Intent self harm by blunt object occ sports/athlet area                        | U4Az.00 | [X]Contact with blunt obj undeterm intent occ unspecif place  |
| 26 |         |                                                                                   |         |                                                               |
| 27 | T941200 | Accidental poisoning by sulphuric acid                                            | U40C000 | [X]Poison/exposure ?intent, to pesticide at home              |
| 28 |         |                                                                                   |         |                                                               |
| 29 | T937400 | Accidental poisoning by zinc phosphide                                            | T923z00 | Accidental poisoning by petrol solids NOS                     |
| 30 | U1A0.13 | [X]Accidental poisoning with aspirin                                              | U4B6.00 | [X]Fall jump/push frm high plce undt intrn indust/constr area |
| 31 |         |                                                                                   |         |                                                               |
| 32 | U1AA.00 | [X]Accid poison/exposure to organ solvent,halogen hydrocarb                       | U206000 | [X]Int self poison/exposure to hallucinogen at home           |
| 33 |         |                                                                                   |         |                                                               |
| 34 | T960z00 | Accidental poisoning by lead, NOS                                                 | U40y000 | [X]Poison/exposure ?intent, to unspecif chemical at home      |
| 35 |         |                                                                                   |         |                                                               |
| 36 | U210.00 | [X]Intent self harm by hanging strangulat/suffocat occ home                       | U220.00 | [X]Intent self harm by drowning/submersion occurrn at home    |
| 37 |         |                                                                                   |         |                                                               |
| 38 | T800.00 | Accidental poisoning by heroin                                                    | U1Ay700 | [X]Accident poison/exposure to unspecif chemical on farm      |
| 39 |         |                                                                                   |         |                                                               |
| 40 | T94z.00 | Accidental poisoning by corrosives and caustics NOS                               | U40yy00 | [X]Pois/exp ?intent to unspecif chemical other spec place     |
| 41 |         |                                                                                   |         |                                                               |
| 42 | U1A8.00 | [X]Accident poison/exposure to other/unspec drug/medicament                       | T941100 | Accidental poisoning by nitric acid                           |
| 43 |         |                                                                                   |         |                                                               |
| 44 | U20By00 | [X]Int self poison other gas/vapour other spec place                              | U1A9200 | [X]Acc poison/expos alcohol school/pub admin area             |
| 45 |         |                                                                                   |         |                                                               |
| 46 | T938100 | Accidental poisoning by methyl bromide                                            | ZX16300 | Gouging own rectum                                            |
| 47 | U1A4.12 | [X]Accidental poisoning with amitriptyline                                        | T830300 | Accidental poisoning by promazine                             |
| 48 | ZX1M.00 | Shooting self                                                                     | U216.00 | [X]Intent self harm by hang strangl/suffc indust/constr area  |
| 49 |         |                                                                                   |         |                                                               |
| 50 | U44..00 | [X]Rifle shotgun+larger firearm discharge undeterm intent                         | T887200 | Accidental poisoning by ophthalmological drugs                |
| 51 |         |                                                                                   |         |                                                               |
| 52 | T922.00 | Accidental poisoning by lubricating oils                                          | 1BDE.00 | Suicide risk increased from previous level                    |
| 53 | T964400 | Accidental poisoning by iron compounds                                            | ZX1R.11 | Jumping in front of vehicle                                   |
| 54 | T964300 | Accidental poisoning by copper salts                                              | U1A9300 | [X]Accid pois/expos alcohol in sport/athletic area            |
| 55 |         |                                                                                   |         |                                                               |
| 56 |         |                                                                                   |         |                                                               |
| 57 |         |                                                                                   |         |                                                               |
| 58 |         |                                                                                   |         |                                                               |
| 59 |         |                                                                                   |         |                                                               |

|    |         |                                                     |         |                                                   |
|----|---------|-----------------------------------------------------|---------|---------------------------------------------------|
| 1  | T887100 | Accidental poisoning by mucous membrane drugs       | U1A9y00 | [X]Accid pois/expos to alcohol other spec place   |
| 2  | U202.11 | [X]Overdose - sleeping tabs                         | TN02.00 | Injury ?accidental, poisoning by other            |
| 3  |         |                                                     |         | sedative/hypnotic                                 |
| 4  | T90z.00 | Accidental poisoning by alcohol NOS                 | T806000 | Accidental poisoning by gold salts                |
| 5  | T981300 | Accidental poisoning by heating gas NOS             | T937100 | Accidental poisoning by squill and derivatives    |
| 6  | T801.00 | Accidental poisoning by methadone                   | T965z00 | Accidental poisoning by plant foods and           |
| 7  |         |                                                     |         | fertilisers NOS                                   |
| 8  | T841100 | Accidental poisoning by lysergide, LSD              | T823.00 | Accidental poisoning by methaqualone              |
| 9  |         |                                                     |         | compounds                                         |
| 10 | T840100 | Accidental poisoning by imipramine                  | U1A8600 | [X]Acc pois/expos oth/unsp drug/medic             |
| 11 |         |                                                     |         | indust/construct area                             |
| 12 | U2B4.00 | [X]Intent self harm by jump from high place occ     | T966z00 | Accidental poisoning by glues and adhesives       |
| 13 |         | street/h'way                                        |         | NOS                                               |
| 14 | TN2y.00 | Injury ?accidental, poisoning by other spec gas or  | TK2y.00 | Suicide + selfinflicted poisoning by other gases  |
| 15 |         | vapour                                              |         | and vapours                                       |
| 16 | U4A0.00 | [X]Contact wth blunt object undetermined intent     | T832300 | Accidental poisoning by lorazepam                 |
| 17 |         | occ at home                                         |         |                                                   |
| 18 | TK52.00 | Suicide and selfinflicted injury by hunting rifle   | T822.00 | Accidental poisoning by bromine compounds         |
| 19 | U242.00 | [X]Int slf hrm rifl s'gun/lrg frarm dis sch/ins/pub | T804.00 | Accidental poisoning by aromatic analgesics       |
| 20 |         | adm area                                            |         | NEC                                               |
| 21 | U28..00 | [X]Intentional self harm by steam hot vapours /     | T80y000 | Accidental poisoning by pentazocine               |
| 22 |         | hot objects                                         |         |                                                   |
| 23 | U2D..00 | [X]Intentional self harm by crashing of motor       | U4A6.00 | [X]Contct wth blunt obj undet intent occ          |
| 24 |         | vehicle                                             |         | industr/constr area                               |
| 25 | ZX1H.00 | Self-asphyxiation                                   | U2y6.00 | [X]Intent self harm oth specif means occ          |
| 26 |         |                                                     |         | industr/constr area                               |
| 27 | T983000 | Accidental poisoning by CO- coal in domestic        | U200600 | [X]Int self pois nonopioid analgesic              |
| 28 |         | stove/fireplace                                     |         | indust/construct area                             |
| 29 | T87..00 | Accidental poisoning by anti-infectives             | TN01300 | Injury ?accidental poisoning by Pentobarbitone    |
| 30 | T77z.00 | Accident/poisoning occurred in residential          | U1A2z00 | [X]Accid poison/expos to sedative hypnotic        |
| 31 |         | institution NOS                                     |         | unspecif place                                    |
| 32 | U20y.00 | [X]Intent self poison/exposure to unspecif          | TK01z00 | Suicide and self inflicted injury by barbiturates |
| 33 |         | chemical                                            |         |                                                   |
| 34 | T937.00 | Accidental poisoning by rodenticides                | TKx0z00 | Suicide + selfinflicted inj-jump/lie before       |
| 35 |         |                                                     |         | moving obj NOS                                    |
| 36 | T934z00 | Accidental poisoning by insecticides NOS            | T805100 | Accidental poisoning by phenylbutazone            |
| 37 | U1A4.00 | [X]Accident poisoning/exposure to psychotropic      | U1A4200 | [X]Acc poison/expos psychotropic drug             |
| 38 |         | drug                                                |         | school/pub admin area                             |
| 39 | U1A4000 | [X]Accident poison/exposure to psychotropic         | U2Dz.00 | [X]Intent self harm by crash motor vehic occ      |
| 40 |         | drug at home                                        |         | unspecif place                                    |
| 41 | ZX1L200 | Self-mutilation of genitalia                        | T804200 | Accidental poisoning by phenacetin                |
| 42 | T855000 | Accidental poisoning by adrenalin                   | 1BDF.00 | Suicide risk unchanged from previous level        |
| 43 | T99z.00 | Accidental poisoning by gases and vapours NOS       | U40By00 | [X]Pois/exp ?intent to other gas/vapour other     |
| 44 |         |                                                     |         | spec place                                        |
| 45 | T982.00 | Accidental poisoning by motor vehicle exhaust       | T993.00 | Accidental poisoning by tear gas                  |
| 46 |         | gas                                                 |         |                                                   |
| 47 | ZX16200 | Gouging own eyes                                    | U1Ay100 | [X]Accid poison/expos to unspecif chemical at     |
| 48 |         |                                                     |         | res institut                                      |
| 49 | T940000 | Accidental poisoning by carbolic acid               | U2yy.00 | [X]Intent self harm oth specif means occ oth      |
| 50 |         |                                                     |         | specif place                                      |
| 51 |         |                                                     |         |                                                   |
| 52 |         |                                                     |         |                                                   |
| 53 |         |                                                     |         |                                                   |
| 54 |         |                                                     |         |                                                   |
| 55 |         |                                                     |         |                                                   |
| 56 |         |                                                     |         |                                                   |
| 57 |         |                                                     |         |                                                   |
| 58 |         |                                                     |         |                                                   |
| 59 |         |                                                     |         |                                                   |
| 60 |         |                                                     |         |                                                   |

**PAIN****At least one ICD-9 in:**

|                                                                   |                                                                                                                                                                                                                                                                                                                                                                                                                             |
|-------------------------------------------------------------------|-----------------------------------------------------------------------------------------------------------------------------------------------------------------------------------------------------------------------------------------------------------------------------------------------------------------------------------------------------------------------------------------------------------------------------|
| Lumbar pain                                                       | 724                                                                                                                                                                                                                                                                                                                                                                                                                         |
| Back disorders                                                    | 721, 722, 723, 723, 737                                                                                                                                                                                                                                                                                                                                                                                                     |
| Neck and back problems                                            | 721.0, 721.1, 721.2, 721.3, 721.4, 721.5, 721.6, 721.7, 721.8, 721.9, 722.0, 722.1, 722.2, 722.3, 722.4, 722.5, 722.6, 722.7, 722.8, 722.9, 723.0, 723.1, 723.2, 723.3, 723.4, 723.5, 723.7, 723.8, 723.9, 724.0, 724.1, 724.2, 724.3, 724.4, 724.5, 724.6, 724.8, 724.9, 737.1, 737.2, 738.2, 738.4, 738.5, 739.1, 739.2, 739.3, 739.4, 756.1, 846.0, 846.1, 846.2, 846.3, 846.8, 846.9, 847.0, 847.1, 847.2, 847.3, 847.9 |
| Complex regional pain syndrome                                    | 337.2, 354.4, 355.7, 355.9                                                                                                                                                                                                                                                                                                                                                                                                  |
| Fibromyalgia                                                      | 729.1                                                                                                                                                                                                                                                                                                                                                                                                                       |
| Painful neuropathic disorders                                     | 250.6, 357.2, 053.1, 722.1, 722.2, 722.7, 724.0, 724.3, 724.4, 721.1, 722.0, 723.0, 723.4, 337.2, 353.2, 353.3, 353.4, 354.4, 355.7, 355.9, 729.2, 353.6, 350.1, 350.2, 352.1, 353.0, 353.1, 353.8, 353.9, 354.0, 354.1, 354.2, 354.3, 354.5, 354.8, 354.9, 355.0, 355.1, 355.2, 355.3, 355.4, 355.5, 355.6, 355.8,                                                                                                         |
| Pain                                                              | 338                                                                                                                                                                                                                                                                                                                                                                                                                         |
| Chronic pain                                                      | 338.2                                                                                                                                                                                                                                                                                                                                                                                                                       |
| Chronic pain associated with significant psychosocial dysfunction | 338.4                                                                                                                                                                                                                                                                                                                                                                                                                       |
| Pain disorders related to psychological factors                   | 307.8                                                                                                                                                                                                                                                                                                                                                                                                                       |
| Migraine and headache                                             | 346, 784, 339                                                                                                                                                                                                                                                                                                                                                                                                               |
| Osteoarthritis/Rheumatoid Arthritis                               | 714, 715                                                                                                                                                                                                                                                                                                                                                                                                                    |
| Irritable bowel syndrome                                          | 564.1                                                                                                                                                                                                                                                                                                                                                                                                                       |
| Lupus                                                             | 710.0                                                                                                                                                                                                                                                                                                                                                                                                                       |

OR

**At least one READ code in:**

|         |                                            |         |                                                 |
|---------|--------------------------------------------|---------|-------------------------------------------------|
| N131.00 | cervicalgia - pain in neck                 | N05..00 | osteoarthritis and allied disorders             |
| 1B1G.00 | headache                                   | N217700 | calcaneal spur                                  |
| 1BA5.00 | frontal headache                           | N23y400 | spasm of muscle                                 |
| F26..00 | migraine                                   | F260.00 | classical migraine                              |
| E278100 | tension headache                           | N224.00 | ganglion and cyst of synovium, tendon and bursa |
| N143.00 | sciatica                                   | N081000 | loose body in joint, unspecified joint          |
| N216500 | prepatellar bursitis                       | PG17.00 | spina bifida occulta                            |
| J521.11 | irritable bowel syndrome                   | 1BA8.00 | temporal headache                               |
| N090.00 | effusion of joint                          | N140.11 | spinal stenosis                                 |
| N213300 | olecranon bursitis                         | N235.00 | hypermobility syndrome                          |
| N145.00 | backache, unspecified                      | N37..00 | curvature of spine                              |
| N12..00 | intervertebral disc disorders              | N225100 | rupture of popliteal space synovial cyst        |
| N217900 | plantar fasciitis                          | F26y000 | hemiplegic migraine                             |
| F340.00 | carpal tunnel syndrome                     | 1B1G000 | sinus headache                                  |
| N040.00 | rheumatoid arthritis                       | N066.00 | unspecified monoarthritis                       |
| J521.00 | irritable colon - irritable bowel syndrome | 7H48211 | release of trigger finger                       |
| N224A00 | synovial cyst of popliteal space           | N01w.00 | reactive arthropathy, unspecified               |
| N371.00 | acquired kyphosis                          | F330.00 | brachial plexus lesions                         |
| N21z300 | exostosis of unspecified site              | N224000 | synovial cyst unspecified                       |
| N221.00 | bunion                                     | N043.00 | juvenile rheumatoid arthritis - still's         |



|    |         |                                      |         |                                                |
|----|---------|--------------------------------------|---------|------------------------------------------------|
| 1  | R040.00 | [d]headache                          | SC20z12 | disease                                        |
| 2  | N220.00 | synovitis and tenosynovitis          | F355.00 | headache - post traumatic                      |
| 3  | N20..00 | polymyalgia rheumatica               | N224200 | tarsal tunnel syndrome                         |
| 4  | F301.00 | other specified trigeminal neuralgia | N083.00 | ganglion of tendon sheath                      |
| 5  | N142.14 | lumbago                              | N245.00 | recurrent dislocation of joint                 |
| 6  | 1BA6.00 | occipital headache                   | N21..00 | pain in limb                                   |
| 7  |         |                                      |         | peripheral enthesopathies and allied syndromes |
| 8  | N372.00 | acquired lordosis                    | PG16.00 | klippel-feil syndrome                          |
| 9  | PG12.00 | congenital spondylolisthesis         | N213200 | lateral epicondylitis of the elbow             |
| 10 | N11..00 | spondylosis and allied disorders     | N221000 | infected bunion                                |
| 11 | N244.00 | fasciitis unspecified                | N141.00 | pain in thoracic spine                         |
| 12 | N220300 | trigger finger - acquired            | 1BB4.00 | morning headache                               |
| 13 | F261.00 | common migraine                      | F262200 | abdominal migraine                             |
| 14 | F262000 | cluster headache                     | N110.00 | cervical spondylosis without myelopathy        |
| 15 | N370.00 | adolescent postural kyphosis         | N384.00 | acquired spondylolisthesis                     |
| 16 | N07..00 | internal derangement of knee         | 7K51111 | unionectomy                                    |
| 17 | N234.00 | laxity of ligament                   |         |                                                |

## STROBE Statement—checklist of items that should be included in reports of observational studies

|                              | Item No | Recommendation                                                                                                                                                                                                                                                                                                                                                                                                                                                         | Page No |
|------------------------------|---------|------------------------------------------------------------------------------------------------------------------------------------------------------------------------------------------------------------------------------------------------------------------------------------------------------------------------------------------------------------------------------------------------------------------------------------------------------------------------|---------|
| <b>Title and abstract</b>    | 1       | (a) Indicate the study's design with a commonly used term in the title or the abstract                                                                                                                                                                                                                                                                                                                                                                                 | 2       |
|                              |         | (b) Provide in the abstract an informative and balanced summary of what was done and what was found                                                                                                                                                                                                                                                                                                                                                                    | 2       |
| <b>Introduction</b>          |         |                                                                                                                                                                                                                                                                                                                                                                                                                                                                        |         |
| Background/rationale         | 2       | Explain the scientific background and rationale for the investigation being reported                                                                                                                                                                                                                                                                                                                                                                                   | 4-5     |
| Objectives                   | 3       | State specific objectives, including any prespecified hypotheses                                                                                                                                                                                                                                                                                                                                                                                                       | 4-5     |
| <b>Methods</b>               |         |                                                                                                                                                                                                                                                                                                                                                                                                                                                                        |         |
| Study design                 | 4       | Present key elements of study design early in the paper                                                                                                                                                                                                                                                                                                                                                                                                                | 5-7     |
| Setting                      | 5       | Describe the setting, locations, and relevant dates, including periods of recruitment, exposure, follow-up, and data collection                                                                                                                                                                                                                                                                                                                                        | 5-6     |
| Participants                 | 6       | (a) <i>Cohort study</i> —Give the eligibility criteria, and the sources and methods of selection of participants. Describe methods of follow-up<br><i>Case-control study</i> —Give the eligibility criteria, and the sources and methods of case ascertainment and control selection. Give the rationale for the choice of cases and controls<br><i>Cross-sectional study</i> —Give the eligibility criteria, and the sources and methods of selection of participants | 5-6     |
|                              |         | (b) <i>Cohort study</i> —For matched studies, give matching criteria and number of exposed and unexposed<br><i>Case-control study</i> —For matched studies, give matching criteria and the number of controls per case                                                                                                                                                                                                                                                 |         |
| Variables                    | 7       | Clearly define all outcomes, exposures, predictors, potential confounders, and effect modifiers. Give diagnostic criteria, if applicable                                                                                                                                                                                                                                                                                                                               | 7       |
| Data sources/<br>measurement | 8*      | For each variable of interest, give sources of data and details of methods of assessment (measurement). Describe comparability of assessment methods if there is more than one group                                                                                                                                                                                                                                                                                   | 5-7     |
| Bias                         | 9       | Describe any efforts to address potential sources of bias                                                                                                                                                                                                                                                                                                                                                                                                              | 8       |
| Study size                   | 10      | Explain how the study size was arrived at                                                                                                                                                                                                                                                                                                                                                                                                                              | N/A     |
| Quantitative variables       | 11      | Explain how quantitative variables were handled in the analyses. If applicable, describe which groupings were chosen and why                                                                                                                                                                                                                                                                                                                                           | 7-8     |
| Statistical methods          | 12      | (a) Describe all statistical methods, including those used to control for confounding                                                                                                                                                                                                                                                                                                                                                                                  | 8       |
|                              |         | (b) Describe any methods used to examine subgroups and interactions                                                                                                                                                                                                                                                                                                                                                                                                    | N/A     |
|                              |         | (c) Explain how missing data were addressed                                                                                                                                                                                                                                                                                                                                                                                                                            | N/A     |
|                              |         | (d) <i>Cohort study</i> —If applicable, explain how loss to follow-up was addressed<br><i>Case-control study</i> —If applicable, explain how matching of cases and controls was addressed                                                                                                                                                                                                                                                                              | N/A     |
|                              |         | (e) Describe any sensitivity analyses                                                                                                                                                                                                                                                                                                                                                                                                                                  | N/A     |

| <b>Results</b>           |     |                                                                                                                                                                                                              | <b>Page No</b> |
|--------------------------|-----|--------------------------------------------------------------------------------------------------------------------------------------------------------------------------------------------------------------|----------------|
| Participants             | 13* | (a) Report numbers of individuals at each stage of study—eg numbers potentially eligible, examined for eligibility, confirmed eligible, included in the study, completing follow-up, and analysed            | N/A            |
|                          |     | (b) Give reasons for non-participation at each stage                                                                                                                                                         | N/A            |
|                          |     | (c) Consider use of a flow diagram                                                                                                                                                                           | N/A            |
| Descriptive data         | 14* | (a) Give characteristics of study participants (eg demographic, clinical, social) and information on exposures and potential confounders                                                                     | 8              |
|                          |     | (b) Indicate number of participants with missing data for each variable of interest                                                                                                                          | N/A            |
|                          |     | (c) <i>Cohort study</i> —Summarise follow-up time (eg, average and total amount)                                                                                                                             | N/A            |
| Outcome data             | 15* | <i>Cohort study</i> —Report numbers of outcome events or summary measures over time                                                                                                                          | 8-9            |
|                          |     | <i>Case-control study</i> —Report numbers in each exposure category, or summary measures of exposure                                                                                                         |                |
|                          |     | <i>Cross-sectional study</i> —Report numbers of outcome events or summary measures                                                                                                                           |                |
| Main results             | 16  | (a) Give unadjusted estimates and, if applicable, confounder-adjusted estimates and their precision (eg, 95% confidence interval). Make clear which confounders were adjusted for and why they were included | N/A            |
|                          |     | (b) Report category boundaries when continuous variables were categorized                                                                                                                                    | N/A            |
|                          |     | (c) If relevant, consider translating estimates of relative risk into absolute risk for a meaningful time period                                                                                             | N/A            |
| Other analyses           | 17  | Report other analyses done—eg analyses of subgroups and interactions, and sensitivity analyses                                                                                                               | N/A            |
| <b>Discussion</b>        |     |                                                                                                                                                                                                              |                |
| Key results              | 18  | Summarise key results with reference to study objectives                                                                                                                                                     | 9-10           |
| Limitations              | 19  | Discuss limitations of the study, taking into account sources of potential bias or imprecision. Discuss both direction and magnitude of any potential bias                                                   | 11             |
| Interpretation           | 20  | Give a cautious overall interpretation of results considering objectives, limitations, multiplicity of analyses, results from similar studies, and other relevant evidence                                   | 10-11          |
| Generalisability         | 21  | Discuss the generalisability (external validity) of the study results                                                                                                                                        | N/A            |
| <b>Other information</b> |     |                                                                                                                                                                                                              |                |
| Funding                  | 22  | Give the source of funding and the role of the funders for the present study and, if applicable, for the original study on which the present article is based                                                | 12             |

\*Give information separately for cases and controls in case-control studies and, if applicable, for exposed and unexposed groups in cohort and cross-sectional studies.

**Note:** An Explanation and Elaboration article discusses each checklist item and gives methodological background and published examples of transparent reporting. The STROBE checklist is best used in conjunction with this article (freely available on the Web sites of PLoS Medicine at <http://www.plosmedicine.org/>, Annals of Internal Medicine at <http://www.annals.org/>, and Epidemiology at <http://www.epidem.com/>). Information on the STROBE Initiative is available at [www.strobe-statement.org](http://www.strobe-statement.org).
