# Supplementary material for: Multinational comparison of new antidepressant use in older adults: a cohort study
Source: PubMed Central journal article supplement — BMJ Open. 2019 May 14;9(5):e027663. doi: 10.1136/bmjopen-2018-027663 (PMC6530307; doi:10.1136/bmjopen-2018-027663), 2019-05-14
Supplement: bmjopen-2018-027663supp001.pdf [file bmjopen-2018-027663supp001.pdf]

**APPENDIX**

**DEPRESSION**

---

**At least one ICD-9 in:**

- 311 Depressive disorder, not elsewhere classified
- 296.2 Major depressive disorder, single episode
- 296.3 Major depressive disorder, recurrent episode
- 309 Adjustment reaction
  - 309.0 Adjustment disorder with depressed mood
  - 309.1 Prolonged depressive reaction
  - 309.2 With predominant disturbance of other emotions
  - 309.3 Adjustment disorder with disturbance of conduct
  - 309.4 Adjustment disorder with mixed disturbance of emotions and conduct
  - 309.8 Other specified adjustment reactions
  - 309.9 Unspecified adjustment reaction

OR

**At least one ICD-10 in:**

- F32 Depressive episode
  - F32.0 Mild depressive episode
  - F32.1 Moderate depressive episode
  - F32.2 Severe depressive episode without psychotic symptoms
  - F32.3 Severe depressive episode with psychotic symptoms
  - F32.8 Other depressive episodes
  - F32.9 Depressive episode, unspecified
- F33 Recurrent depressive disorder
  - F33.0 Recurrent depressive disorder, current episode mild
  - F33.1 Recurrent depressive disorder, current episode moderate
  - F33.2 Recurrent depressive disorder, current episode severe without psychotic symptoms
  - F33.3 Recurrent depressive disorder, current episode severe with psychotic symptoms
  - F33.4 Recurrent depressive disorder, currently in remission
  - F33.8 Other recurrent depressive disorders
  - F33.9 Recurrent depressive disorder, unspecified
- F41.2 Mixed anxiety and depressive disorder

OR

**At least one READ code in:†:**

|         |                         |         |                                                              |
|---------|-------------------------|---------|--------------------------------------------------------------|
| E2B..00 | Depressive disorder NEC | Eu32311 | [X]Single episode of major depression and psychotic symptoms |
| Eu32z11 | [X]Depression NOS       | E113400 | Recurrent major depressive episodes, severe, with            |

|         |                                              |         |                                                              |
|---------|----------------------------------------------|---------|--------------------------------------------------------------|
| E112.14 | Endogenous depression                        | E113z00 | psychosis                                                    |
| E200300 | Anxiety with depression                      | E113300 | Recurrent major depressive episode NOS                       |
| E135.00 | Agitated depression                          | E113300 | Recurrent major depressive episodes, severe, no psychosis    |
| E204.00 | Neurotic depression reactive type            | E11y200 | Atypical depressive disorder                                 |
| E290.00 | Brief depressive reaction                    | E001300 | Presenile dementia with depression                           |
| 2257.00 | O/E - depressed                              | Eu02z16 | [X] Senile dementia, depressed or paranoid type              |
| 1B17.00 | Depressed                                    | Eu32z13 | [X]Prolonged single episode of reactive depression           |
| E11..12 | Depressive psychoses                         | Eu33.14 | [X]Seasonal depressive disorder                              |
| E204.11 | Postnatal depression                         | Eu32314 | [X]Single episode of reactive depressive psychosis           |
| 1465.00 | H/O: depression                              | E113100 | Recurrent major depressive episodes, mild                    |
| 62T1.00 | Puerperal depression                         | Eu33100 | [X]Recurrent depressive disorder, current episode moderate   |
| Eu32z00 | [X]Depressive episode, unspecified           | R007z13 | [D]Postoperative depression                                  |
| E2B0.00 | Postviral depression                         | Eu33000 | [X]Recurrent depressive disorder, current episode mild       |
| Eu32z12 | [X]Depressive disorder NOS                   | Eu33314 | [X]Recurr severe episodes/psychogenic depressive psychosis   |
| Eu33.00 | [X]Recurrent depressive disorder             | E112400 | Single major depressive episode, severe, with psychosis      |
| E2B1.00 | Chronic depression                           | Eu92000 | [X]Depressive conduct disorder                               |
| Eu32.00 | [X]Depressive episode                        | Eu33313 | [X]Recurr severe episodes/major depression+psychotic symptom |
| 1B17.11 | C/O - feeling depressed                      | Eu33200 | [X]Recurr depress disorder cur epi severe without psyc sympt |
| Eu53012 | [X]Postpartum depression NOS                 | E112000 | Single major depressive episode, unspecified                 |
| E112.11 | Agitated depression                          | E113000 | Recurrent major depressive episodes, unspecified             |
| Eu32z14 | [X] Reactive depression NOS                  | E290z00 | Brief depressive reaction NOS                                |
| E113700 | Recurrent depression                         | Eu33z11 | [X]Monopolar depression NOS                                  |
| E112.12 | Endogenous depression first episode          | Eu33316 | [X]Recurrent severe episodes/reactive depressive psychosis   |
| Eu32y00 | [X]Other depressive episodes                 | E002z00 | Senile dementia with depressive or paranoid features NOS     |
| E113.11 | Endogenous depression - recurrent            | Eu32211 | [X]Single episode agitated depressn w/out psychotic symptoms |
| E112.13 | Endogenous depression first episode          | E004300 | Arteriosclerotic dementia with depression                    |
| E112z00 | Single major depressive episode NOS          | E112500 | Single major depressive episode, partial or unspec remission |
| Eu32.13 | [X]Single episode of reactive depression     | Eu33z00 | [X]Recurrent depressive disorder, unspecified                |
| Eu34113 | [X]Neurotic depression                       | E002.00 | Senile dementia with depressive or paranoid features         |
| Eu41211 | [X]Mild anxiety depression                   | E02y300 | Drug-induced depressive state                                |
| Eu34100 | [X]Dysthymia                                 | Eu33300 | [X]Recurrent depress disorder cur epi severe with psyc symp  |
| Eu34111 | [X]Depressive neurosis                       | Eu33y00 | [X]Other recurrent depressive disorders                      |
| Eu33.15 | [X]SAD - Seasonal affective disorder         | Eu32312 | [X]Single episode of psychogenic depressive psychosis        |
| Eu33.11 | [X]Recurrent episodes of depressive reaction | E113600 | Recurrent major depressive episodes, in full remission       |
| Eu33.13 | [X]Recurrent episodes of reactive depression | E113500 | Recurrent major depressive episodes,partial/unspec remission |
|         |                                              | Eu32y12 | [X]Single episode of masked depression NOS                   |

|         |                                                            |         |                                                             |
|---------|------------------------------------------------------------|---------|-------------------------------------------------------------|
| Eu32.11 | [X]Single episode of depressive reaction                   | E112600 | Single major depressive episode, in full remission          |
| E11z200 | Masked depression                                          | Eu32213 | [X]Single episode vital depression w/out psychotic symptoms |
| Eu32100 | [X]Moderate depressive episode                             | Eu33214 | [X]Vital depression, recurrent without psychotic symptoms   |
| Eu32200 | [X]Severe depressive episode without psychotic symptoms    | Eu32600 | [X]Major depression, moderately severe                      |
| 1B1U.00 | Symptoms of depression                                     | Eu32500 | [X]Major depression, mild                                   |
| 1BT..00 | Depressed mood                                             | Eu32700 | [X]Major depression, severe without psychotic symptoms      |
| 1B1U.11 | Depressive symptoms                                        | Eu32800 | [X]Major depression, severe with psychotic symptoms         |
| E112.00 | Single major depressive episode                            | Eu32900 | [X]Single major depr ep, severe with psych, psych in remiss |
| Eu32400 | [X]Mild depression                                         | Eu32A00 | [X]Recurr major depr ep, severe with psych, psych in remiss |
| Eu32y11 | [X]Atypical depression                                     | Eu32B00 | [X]Antenatal depression                                     |
| E118.00 | Seasonal affective disorder                                | Eu34114 | [X]Persistant anxiety depression                            |
| Eu33212 | [X]Major depression, recurrent without psychotic symptoms  | E112100 | Single major depressive episode, mild                       |
| Eu33211 | [X]Endogenous depression without psychotic symptoms        | E291.00 | Prolonged depressive reaction                               |
| Eu32000 | [X]Mild depressive episode                                 | Eu33315 | [X]Recurrent severe episodes of psychotic depression        |
| Eu41200 | [X]Mixed anxiety and depressive disorder                   | Eu32.12 | [X]Single episode of psychogenic depression                 |
| Eu32300 | [X]Severe depressive episode with psychotic symptoms       | Eu3y111 | [X]Recurrent brief depressive episodes                      |
| Eu53011 | [X]Postnatal depression NOS                                | Eu33.12 | [X]Recurrent episodes of psychogenic depression             |
| E113200 | Recurrent major depressive episodes, moderate              | Eu20400 | [X]Post-schizophrenic depression                            |
| E113.00 | Recurrent major depressive episode                         | E002100 | Senile dementia with depression                             |
| E112200 | Single major depressive episode, moderate                  | Eu33400 | [X]Recurrent depressive disorder, currently in remission    |
| E112300 | Single major depressive episode, severe, without psychosis | Eu32212 | [X]Single episode major depression w/out psychotic symptoms |
| Eu32313 | [X]Single episode of psychotic depression                  | Eu33311 | [X]Endogenous depression with psychotic symptoms            |

## ANXIETY

### At least one ICD-9 in:

300 Anxiety, dissociative and somatoform disorders

OR

### At least one ICD-10 in:

F40 Phobic anxiety disorders  
F41 Other anxiety disorders (except F41.2)  
F42 Obsessive-compulsive disorder  
F43 Reaction to severe stress, and adjustment disorders  
F44 Dissociative and conversion disorders  
F45 Somatoform disorders  
F48 Other nonpsychotic mental disorders

OR

### At least one READ code in:

|         |                                 |         |                                              |
|---------|---------------------------------|---------|----------------------------------------------|
| 1B13.00 | Anxiousness                     | Eu42.11 | [X]Anankastic neurosis                       |
| E28..00 | Acute reaction to stress        | Eu45213 | [X]Hypochondriacal neurosis                  |
| E200111 | Panic attack                    | Eu93100 | [X]Phobic anxiety disorder of childhood      |
| E200.00 | Anxiety states                  | Eu45000 | [X]Somatization disorder                     |
| E200300 | Anxiety with depression         | E201C00 | Phantom pregnancy                            |
| E20z.11 | Nervous breakdown               | E201z12 | Ataxia - hysterical                          |
| Eu41111 | [X]Anxiety neurosis             | E283100 | Acute posttrauma stress state                |
| E202B00 | Cancer phobia                   | Eu41z11 | [X]Anxiety NOS                               |
| E205.11 | Nervous exhaustion              | E28z.00 | Acute stress reaction NOS                    |
| E202800 | Claustrophobia                  | Z4I7211 | Reducing anxiety                             |
| E200400 | Chronic anxiety                 | E29y400 | Adjustment reaction due to hospitalisation   |
| E202.00 | Phobic disorders                | Eu44.13 | [X]Hysteria                                  |
| E203100 | Obsessional neurosis            | Eu44600 | [X]Dissociative anaesthesia and sensory loss |
| E201.00 | Hysteria                        | Eu40y00 | [X]Other phobic anxiety disorders            |
| E202000 | Phobia unspecified              | E28z.13 | Stage fright                                 |
| E202C00 | Dental phobia                   | Eu46.00 | [X]Other neurotic disorders                  |
| Eu40000 | [X]Agoraphobia                  | E202600 | Acrophobia                                   |
| E29..00 | Adjustment reaction             | E28z.11 | Examination fear                             |
| E264200 | Cyclical vomiting - psychogenic | Eu41y11 | [X]Anxiety hysteria                          |
| E202100 | Agoraphobia with panic attacks  | E292312 | Specific work inhibition                     |
| E203.00 | Obsessive-compulsive disorders  | Z4I7200 | Alleviating anxiety                          |
| E205.00 | Neurasthenia - nervous debility | E202700 | Animal phobia                                |
| 1466.00 | H/O: anxiety state              | E201B00 | Compensation neurosis                        |
| E201100 | Hysterical blindness            | Eu45413 | [X]Psychogenic headache                      |
| E20y100 | Writer's cramp neurosis         | E262.00 | Psychogenic cardiovascular symptoms          |
| E264400 | Psychogenic dyspepsia           | E263.00 | Psychogenic skin symptoms                    |
| E200100 | Panic disorder                  | E283z00 | Other acute stress reaction NOS              |
| Eu41012 | [X]Panic state                  | Eu93200 | [X]Social anxiety disorder of childhood      |

|         |                                                        |         |                                                              |
|---------|--------------------------------------------------------|---------|--------------------------------------------------------------|
| E201z11 | Aphonia - hysterical                                   | Eu45400 | [X]Persistent somatoform pain disorder                       |
| E201612 | Globus hystericus                                      | Eu45212 | [X]Dysmorphophobia nondelusional                             |
| E202A0  | Fear of flying                                         | E262300 | Psychogenic cardiovascular disorder                          |
| 0       |                                                        |         |                                                              |
| Eu43100 | [X]Post - traumatic stress disorder                    | E264.00 | Psychogenic gastrointestinal tract symptoms                  |
| E26..00 | Physiological malfunction arising from mental factors  | Eu43z00 | [X]Reaction to severe stress, unspecified                    |
| E201700 | Hysterical amnesia                                     | E2D0.00 | Disturbance of anxiety and fearfulness childhood/adolescent  |
| E200z00 | Anxiety state NOS                                      | E202900 | Fear of crowds                                               |
| E200500 | Recurrent anxiety                                      | E202400 | Social phobia, fear of public speaking                       |
| E200200 | Generalised anxiety disorder                           | E261000 | Psychogenic air hunger                                       |
| E201800 | Hysterical fugue                                       | Eu43111 | [X]Traumatic neurosis                                        |
| E264000 | Psychogenic aerophagy                                  | E29y100 | Other post-traumatic stress disorder                         |
| E26z.00 | Psychosomatic disorder NOS                             | Eu45312 | [X]Da Costa's syndrome                                       |
| E20..00 | Neurotic disorders                                     | E201511 | Fit - hysterical                                             |
| Eu42.00 | [X]Obsessive - compulsive disorder                     | Eu40z00 | [X]Phobic anxiety disorder, unspecified                      |
| E206.00 | Depersonalisation syndrome                             | E261z00 | Psychogenic respiratory symptom NOS                          |
| Eu41.00 | [X]Other anxiety disorders                             | E201400 | Hysterical paralysis                                         |
| E203000 | Compulsive neurosis                                    | Eu45111 | [X]Undifferentiated psychosomatic disorder                   |
| 1B13.11 | Anxiousness - symptom                                  | Eu44400 | [X]Dissociative motor disorders                              |
| E202E00 | Fear of pregnancy                                      | Eu44.11 | [X]Conversion hysteria                                       |
| E293000 | Adjustment reaction with aggression                    | E2D0z00 | Disturbance anxiety and fearfulness childhood/adolescent NOS |
| E292000 | Separation anxiety disorder                            | E2D0000 | Childhood and adolescent overanxiousness disturbance         |
| Eu41011 | [X]Panic attack                                        | E29y200 | Adjustment reaction with physical symptoms                   |
| E200000 | Anxiety state unspecified                              | Eu41112 | [X]Anxiety reaction                                          |
| Eu40z11 | [X]Phobia NOS                                          | E293100 | Adjustment reaction with antisocial behaviour                |
| Eu45200 | [X]Hypochondriacal disorder                            | Eu45y14 | [X]Psychogenic torticollis                                   |
| E29y300 | Elective mutism due to an adjustment reaction          | Eu45414 | [X]Somatoform pain disorder                                  |
| Eu41211 | [X]Mild anxiety depression                             | Eu43211 | [X]Culture shock                                             |
| Eu43015 | [X]Psychic shock                                       | Eu43011 | [X]Acute crisis reaction                                     |
| Eu41000 | [X]Panic disorder [episodic paroxysmal anxiety]        | E29z.00 | Adjustment reaction NOS                                      |
| Eu46100 | [X]Depersonalization - derealization syndrome          | E264.11 | Globus abdominalis                                           |
| Eu40.00 | [X]Phobic anxiety disorders                            | E261.00 | Psychogenic respiratory symptoms                             |
| Eu46011 | [X]Fatigue syndrome                                    | Eu45412 | [X]Psychogenic backache                                      |
| Eu40200 | [X]Specific (isolated) phobias                         | E283.00 | Other acute stress reactions                                 |
| E202.12 | Phobic anxiety                                         | Eu42y00 | [X]Other obsessive-compulsive disorders                      |
| Eu41100 | [X]Generalized anxiety disorder                        | E20y200 | Other occupational neurosis                                  |
| E202D0  | Fear of death                                          | Eu44300 | [X]Trance and possession disorders                           |
| 0       |                                                        |         |                                                              |
| Eu43012 | [X]Acute reaction to stress                            | Eu44100 | [X]Dissociative fugue                                        |
| Eu43.00 | [X]Reaction to severe stress, and adjustment disorders | Eu44y12 | [X]Multiple personality                                      |
| Eu40213 | [X]Claustrophobia                                      | E201z13 | Ganser's syndrome - hysterical                               |
| Eu43200 | [X]Adjustment disorders                                | E278.00 | Psychalgia                                                   |
| Eu46y13 | [X]Occupational neurosis, including writer's cramp     | Eu44000 | [X]Dissociative amnesia                                      |
| Eu44511 | [X]Pseudoseizures                                      | Eu45300 | [X]Somatoform autonomic dysfunction                          |
| Eu40100 | [X]Social phobias                                      | Eu43213 | [X]Hospitalism in children                                   |

|         |                                                             |         |                                                          |
|---------|-------------------------------------------------------------|---------|----------------------------------------------------------|
| Eu43000 | [X]Acute stress reaction                                    | E29y.00 | Other adjustment reactions                               |
| 146G.00 | H/O: agoraphobia                                            | E201000 | Hysteria unspecified                                     |
| 1B1V.00 | C/O - panic attack                                          | E261500 | Psychogenic aphonia                                      |
| Eu41200 | [X]Mixed anxiety and depressive disorder                    | E20y.00 | Other neurotic disorders                                 |
| E280.00 | Acute panic state due to acute stress reaction              | E2z..00 | Neuroses or other mental disorder NOS                    |
| Eu44411 | [X]Psychogenic aphonia                                      | E281.00 | Acute fugue state due to acute stress reaction           |
| Eu45500 | [X]Globus pharyngeus                                        | Eu40112 | [X]Social neurosis                                       |
| Eu40300 | [X]Needle phobia                                            | E20yz00 | Other neurotic disorder NOS                              |
| Eu40214 | [X]Simple phobia                                            | E201900 | Multiple personality                                     |
| Eu45316 | [X]Psychogenic cough                                        | Eu45317 | [X]Psychogenic diarrhoea                                 |
| Eu45322 | [X]Psychogenic hyperventilat                                | E28..11 | Combat fatigue                                           |
| E202200 | Agoraphobia without mention of panic attacks                | E260.00 | Psychogenic musculoskeletal symptoms                     |
| 2258.00 | O/E - anxious                                               | Eu45311 | [X]Cardiac neurosis                                      |
| E202z00 | Phobic disorder NOS                                         | Eu41300 | [X]Other mixed anxiety disorders                         |
| E20z.00 | Neurotic disorder NOS                                       | Eu46y00 | [X]Other specified neurotic disorders                    |
| Eu40012 | [X]Panic disorder with agoraphobia                          | E265200 | Psychogenic dysmenorrhea                                 |
| E262z00 | Psychogenic cardiovascular symptom NOS                      | Eu46y16 | [X]Psychogenic syncope                                   |
| E260z00 | Psychogenic musculoskeletal symptoms NOS                    | E201200 | Hysterical deafness                                      |
| Eu34114 | [X]Persistant anxiety depression                            | E278200 | Psychogenic backache                                     |
| E263z00 | Psychogenic skin symptoms NOS                               | E294.00 | Adjustment reaction with disturbance emotion and conduct |
| E262200 | Neurocirculatory asthenia                                   | E201611 | Astasia - abasia, hysterical                             |
| E262000 | Cardiac neurosis                                            | Eu44y11 | [X]Ganser's syndrome                                     |
| E20y000 | Somatization disorder                                       | Eu45y11 | [X]Psychogenic dysmenorrhoea                             |
| E264300 | Psychogenic diarrhoea                                       | E203.11 | Anancastic neurosis                                      |
| E201600 | Other conversion disorder                                   | Eu46y12 | [X]Dhat syndrome                                         |
| E261100 | Psychogenic cough                                           | Eu45320 | [X]Psychogenic flatulence                                |
| E282.00 | Acute stupor state due to acute stress reaction             | E261200 | Psychogenic hiccough                                     |
| E203z00 | Obsessive-compulsive disorder NOS                           | E260000 | Psychogenic paralysis                                    |
| E292z00 | Adjustment reaction with disturbance of other emotion NOS   | E292y00 | Adjustment reaction with mixed disturbance of emotion    |
| E264500 | Psychogenic constipation                                    | Eu45z00 | [X]Somatoform disorder, unspecified                      |
| E263000 | Psychogenic pruritus                                        | Eu44z00 | [X]Dissociative [conversion] disorder, unspecified       |
| E202300 | Social phobia, fear of eating in public                     | Eu46z00 | [X]Neurotic disorder, unspecified                        |
| E293.00 | Adjustment reaction with predominant disturbance of conduct | E2y..00 | Other specified neuroses or other mental disorders       |
| E201500 | Hysterical seizures                                         | Eu44611 | [X]Psychogenic deafness                                  |
| Eu45324 | [X]Psychogenic IBS                                          | Eu41113 | [X]Anxiety state                                         |
| Eu46000 | [X]Neurasthenia                                             | Eu45314 | [X]Neurocirculatory asthenia                             |
| E202.11 | Social phobic disorders                                     | Eu44.12 | [X]Conversion reaction                                   |
| Eu45y13 | [X]Psychogenic pruritis                                     | Eu45319 | [X]Psychogenic dysuria                                   |
| Eu45318 | [X]Psychogenic dyspepsia                                    | E29y000 | Concentration camp syndrome                              |
| Eu40011 | [X]Agoraphobia without history of panic disorder            | Eu45321 | [X]Psychogenic hiccough                                  |
| Eu44y13 | [X]Psychogenic confusion                                    | E278000 | Psychogenic pain unspecified                             |
| Eu45323 | [X]Psychogenic freq micturit                                | E278z00 | Psychalgia NOS                                           |
| Eu51511 | [X]Dream anxiety disorder                                   | Eu45411 | [X]Psychalgia                                            |
| Eu93000 | [X]Separation anxiety disorder of childhood                 | E292200 | Early adult emancipation disorder                        |
| Eu45.00 | [X]Somatoform disorders                                     | E265300 | Psychogenic dysuria                                      |
| Eu40212 | [X]Animal phobias                                           | Eu44200 | [X]Dissociative stupor                                   |

|         |                                                              |         |                                                              |
|---------|--------------------------------------------------------------|---------|--------------------------------------------------------------|
| Eu42200 | [X]Mixed obsessional thoughts and acts                       | E260100 | Psychogenic torticollis                                      |
| E202500 | Social phobia, fear of public washing                        | E292400 | Adjustment reaction with anxious mood                        |
| Eu44412 | [X]Psychogenic dysphonia                                     | E20y011 | Briquet's disorder                                           |
| 225J.00 | O/E - panic attack                                           | Eu44500 | [X]Dissociative convulsions                                  |
| Eu45z11 | [X]Psychosomatic disorder NOS                                | Eu45100 | [X]Undifferentiated somatoform disorder                      |
| E29y500 | Other adjustment reaction with withdrawal                    | E292500 | Culture shock                                                |
| E261300 | Psychogenic hyperventilation                                 | Eu45012 | [X]Briquet's syndrome                                        |
| E265100 | Psychogenic vaginismus                                       | Eu93y12 | [X]Childhood overanxious disorder                            |
| E283000 | Acute situational disturbance                                | Eu46y14 | [X]Psychasthenia                                             |
| Eu42000 | [X]Predominantly obsessional thoughts or ruminations         | Eu45y00 | [X]Other somatoform disorders                                |
| Eu05400 | [X]Organic anxiety disorder                                  | E292300 | Specific academic or work inhibition                         |
| E28z.12 | Flying phobia                                                | E26y.00 | Other psychogenic malfunction                                |
| Eu45y12 | [X]Globus hystericus                                         | Z4I7100 | Recognising anxiety                                          |
| Eu46z11 | [X]Neurosis NOS                                              | Eu45313 | [X]Gastric neurosis                                          |
| Eu43014 | [X]Crisis state                                              | Eu44y00 | [X]Other dissociative [conversion] disorders                 |
| Eu43y00 | [X]Other reactions to severe stress                          | E293200 | Adjustment reaction with destructiveness                     |
| Eu42.12 | [X]Obsessive-compulsive neurosis                             | Eu45215 | [X]Nosophobia                                                |
| Eu42100 | [X]Predominantly compulsive acts [obsessional rituals]       | E292311 | Specific academic or work inhibition                         |
| Eu44.00 | [X]Dissociative [conversion] disorders                       | Eu40z12 | [X]Phobic state NOS                                          |
| Z4I7.00 | Acknowledging anxiety                                        | Eu40211 | [X]Acrophobia                                                |
| Eu42z00 | [X]Obsessive-compulsive disorder, unspecified                | Eu44y14 | [X]Psychogenic twilight state                                |
| E292100 | Adolescent emancipation disorder                             | E265.00 | Psychogenic genitourinary tract symptoms                     |
| E201z00 | Hysteria NOS                                                 | Eu43013 | [X]Combat fatigue                                            |
| E261400 | Psychogenic yawning                                          | E264z00 | Psychogenic gastrointestinal tract symptom NOS               |
| E29yz00 | Other adjustment reactions NOS                               | E20y300 | Psychasthenic neurosis                                       |
| E201A0  | Dissociative reaction unspecified                            | E265z00 | Psychogenic genitourinary tract symptom NOS                  |
| 0       |                                                              | Eu44700 | [X]Mixed dissociative [conversion] disorders                 |
| E201300 | Hysterical tremor                                            | E267.00 | Psychogenic symptom of special sense organ                   |
| Eu45011 | [X]Multiple psychosomatic disorder                           | Eu46y15 | [X]Psychasthenia neurosis                                    |
| Eu4..00 | [X]Neurotic, stress - related and somoform disorders         | Eu45325 | [X]Psychogenic pylorospasm                                   |
| Eu41z00 | [X]Anxiety disorder, unspecified                             | 1B13.12 | Anxious                                                      |
| E284.00 | Stress reaction causing mixed disturbance of emotion/conduct | E26yz00 | Other psychogenic malfunction NOS                            |
| Eu41y00 | [X]Other specified anxiety disorders                         | Eu45511 | [X]Globus hystericus                                         |
| E292.00 | Adjustment reaction, predominant disturbance other emotions  | Eu46y11 | [X]Briquet's disorder                                        |
| E293z00 | Adjustment reaction with predominant disturbance conduct NOS | Eu43400 | [X]Chron post-traumatic stress disorder follow military comb |
| Eu45013 | [X]Briquet's disorder                                        | Eu43300 | [X]Acute post-traumatic stress disorder follow military comb |

## MENTAL DISORDERS

### At least one ICD-9 in:

295 Schizophrenic disorders  
 296 Episodic mood disorders (except 296.2 & 296.3)  
 297 Delusional disorders  
 298 Other nonorganic psychoses  
 299 Pervasive developmental disorders  
 301 Personality disorders

OR

### At least one ICD-10 in:

F20 Schizophrenia  
 F21 Schizotypal disorder  
 F22 Delusional disorders  
 F23 Brief psychotic disorder  
 F24 Shared psychotic disorder  
 F25 Schizoaffective disorders  
 F28 Other psychotic disorder not due to a substance or known physiological condition  
 F29 Unspecified psychosis not due to a substance or known physiological condition  
 F30 Manic episode  
 F31 Bipolar disorder  
 F34 Persistent mood [affective] disorders  
 F39 Unspecified mood [affective] disorder

OR

### At least one READ code in:

|         |                                               |         |                                                              |
|---------|-----------------------------------------------|---------|--------------------------------------------------------------|
| E104.00 | Acute schizophrenic episode                   | Eu6y100 | [X]Intent product/feign of symptom/disab eith physical/psych |
| Eu2z.11 | [X]Psychosis NOS                              | Eu50400 | [X]Overeating associated with other psychological disturbncs |
| E21z.11 | Psychopathic personality                      | Eu60711 | [X]Asthenic personality disorder                             |
| E10..00 | Schizophrenic disorders                       | E04z.00 | Chronic organic psychosis NOS                                |
| E2F3z00 | Speech or language developmental disorder NOS | Eu34z00 | [X]Persistent mood affective disorder, unspecified           |
| E214100 | Obsessional personality                       | Eu6z.00 | [X]Unspecified disorder of adult personality and behaviour   |
| E21y500 | Immature personality disorder                 | Eu10600 | [X]Mental and behav dis due to use alcohol: amnesic syndrome |
| E103.00 | Paranoid schizophrenia                        | E214.11 | Anancastic personality                                       |
| Eu31.11 | [X]Manic-depressive illness                   | Eu60800 | [X]Addictive personality                                     |
| E2A1200 | Change in personality                         | Eu53000 | [X]Mild mental/behav disorder assoc with the puerperium NEC  |
| 1B1E.00 | Hallucinations                                | Eu21.15 | [X]Prodromal schizophrenia                                   |
| 1BH..00 | Delusions                                     | Eu53100 | [X]Severe mental and behav disorder assoc wth puerperium NEC |
| ZV40.13 | [V]Psychological problems                     | Eu22y11 | [X]Delusional dysmorphophobia                                |



|         |                                                              |         |                                                              |
|---------|--------------------------------------------------------------|---------|--------------------------------------------------------------|
| E21..00 | Personality disorders                                        | Eu25112 | [X]Schizophreniform psychosis, depressive type               |
| Eu22011 | [X]Paranoid psychosis                                        | E141100 | Residual disintegrative psychoses                            |
| E03y300 | Unspecified puerperal psychosis                              | Eu13.00 | [X]Mental and behavioural dis due use sedatives/hypnotics    |
| E107.00 | Schizo-affective schizophrenia                               | Eu05y00 | [X]Oth sp mental disord brain damag/dysfunction/physcal disd |
| R001.00 | [D]Hallucinations                                            | E11z.00 | Other and unspecified affective psychoses                    |
| E11..12 | Depressive psychoses                                         | 1S04.00 | C/O - illusions seen                                         |
| E21y711 | Neurotic personality                                         | E2z..00 | Neuroses or other mental disorder NOS                        |
| Eu30000 | [X]Hypomania                                                 | Eu11000 | [X]Mental & behav dis due to use opioids: acute intoxication |
| E00z.00 | Senile or presenile psychoses NOS                            | Eu60z00 | [X]Personality disorder, unspecified                         |
| Eu63300 | [X]Trichotillomania                                          | Eu34.00 | [X]Persistent mood affective disorders                       |
| E212.00 | Schizoid personality disorder                                | E110300 | Single manic episode, severe without mention of psychosis    |
| E11z100 | Rebound mood swings                                          | Eu15.00 | [X]Mental & behav disorder due other stimulants inc caffeine |
| E2F3.00 | Speech or language developmental disorder                    | E14..00 | Psychoses with origin in childhood                           |
| E...00  | Mental disorders                                             | Eu20100 | [X]Hebephrenic schizophrenia                                 |
| E13z.11 | Psychotic episode NOS                                        | 1BH0.00 | Delusion of persecution                                      |
| E114.00 | Bipolar affective disorder, currently manic                  | Eu60400 | [X]Histrionic personality disorder                           |
| E215200 | Emotionally unstable personality                             | E107200 | Chronic schizo-affective schizophrenia                       |
| E121.00 | Chronic paranoid psychosis                                   | E215000 | Unspecified histrionic personality disorder                  |
| E100200 | Chronic schizophrenic                                        | Eu10000 | [X]Mental & behav dis due to use alcohol: acute intoxication |
| E12..00 | Paranoid states                                              | Eu23300 | [X]Other acute predominantly delusional psychotic disorders  |
| 285..11 | Psychotic condition, insight present                         | Eu84z00 | [X]Pervasive developmental disorder, unspecified             |
| E011000 | Korsakov's alcoholic psychosis                               | Eu13200 | [X]Mental and behav dis due to seds/hypntcs: dependence synd |
| E216.00 | Inadequate personality disorder                              | Eu81y00 | [X]Other developmental disorders of scholastic skills        |
| E115.00 | Bipolar affective disorder, currently depressed              | E100400 | Acute exacerbation of chronic schizophrenia                  |
| Eu30z11 | [X]Mania NOS                                                 | Eu23y00 | [X]Other acute and transient psychotic disorders             |
| Eu31500 | [X]Bipolar affect dis cur epi severe depres with psyc symp   | Eu30z00 | [X]Manic episode, unspecified                                |
| E215.11 | Hysterical personality disorders                             | Eu8y.00 | [X]Other disorders of psychological development              |
| Eu22015 | [X]Paranoia                                                  | Eu31600 | [X]Bipolar affective disorder, current episode mixed         |
| Eu10.00 | [X]Mental and behavioural disorders due to use of alcohol    | Eu60215 | [X]Sociopathic personality disorder                          |
| E210.00 | Paranoid personality disorder                                | Eu19200 | [X]Mental and behav dis mlti/oth psych sbs: dependence syndr |
| Eu3..00 | [X]Mood - affective disorders                                | ZV40z00 | [V]Unspecified mental or behavioural problem                 |
| 146..00 | H/O: psychiatric disorder                                    | Eu0z.00 | [X]Unspecified organic or symptomatic mental disorder        |
| Eu80.00 | [X]Specific developmental disorders of speech and language   | Eu80y00 | [X]Other developmental disorders of speech and language      |
| 1464.00 | H/O: schizophrenia                                           | E111z00 | Recurrent manic episode NOS                                  |
| E213.11 | Aggressive personality                                       | E111100 | Recurrent manic episodes, mild                               |
| Eu83.00 | [X]Mixed specific developmental disorders                    | E114200 | Bipolar affective disorder, currently manic, moderate        |
| Eu80z00 | [X]Developmental disorder of speech and language unspecified | Eu6y200 | [X]Munchausen's by proxy                                     |
| Eu81z00 | [X]Developmental disorder of scholastic skills, unspecified  | L184.00 | Mental disorders in pregnancy, childbirth and the puerperium |
| Eu05y11 | [X]Epileptic psychosis NOS                                   | Eu33300 | [X]Recurrent depress disorder cur epi severe with psyc symp  |
| Eu31.12 | [X]Manic-depressive psychosis                                | Eu24.12 | [X] Induced paranoid disorder                                |
| Eu31.00 | [X]Bipolar affective disorder                                | Eu11.00 | [X]Mental and behavioural disorders due to use of opioids    |
| Eu84.00 | [X]Pervasive developmental disorders                         | Eu02z12 | [X] Presenile psychosis NOS                                  |
| E0...00 | Organic psychotic conditions                                 | Eu14100 | [X]Mental and behav dis due to use of cocaine:               |

|         |                                                              |         |                                                              |
|---------|--------------------------------------------------------------|---------|--------------------------------------------------------------|
| Eu82.00 | [X]Specific developmental disorder of motor function         | Eu22013 | harmful use<br>[X]Paraphrenia - late                         |
| E132.00 | Reactive confusion                                           | Eu84y00 | [X]Other pervasive developmental disorders                   |
| Eu60300 | [X]Emotionally unstable personality disorder                 | E101z00 | Hebephrenic schizophrenia NOS                                |
| E10z.00 | Schizophrenia NOS                                            | Eu62000 | [X]Enduring personality change after catastrophic experience |
| Eu60600 | [X]Anxious [avoidant] personality disorder                   | 1S40.00 | Dysphoric mood                                               |
| E130.00 | Reactive depressive psychosis                                | Eu06013 | [X]Limbic epilepsy personality                               |
| E11..11 | Bipolar psychoses                                            | Eu30212 | [X]Mania with mood-incongruent psychotic symptoms            |
| Eu0z.12 | [X]Symptomatic psychosis NOS                                 | Eu60014 | [X]Sensitive paranoid personality disorder                   |
| E103z00 | Paranoid schizophrenia NOS                                   | E216.11 | Asthenic personality                                         |
| Eu25.00 | [X]Schizoaffective disorders                                 | Eu66z00 | [X]Psychosexual development disorder, unspecified            |
| Eu30.11 | [X]Bipolar disorder, single manic episode                    | Eu22z00 | [X]Persistent delusional disorder, unspecified               |
| E2...00 | Neurotic, personality and other nonpsychotic disorders       | Eu20y00 | [X]Other schizophrenia                                       |
| Eu...00 | [X]Mental and behavioural disorders                          | E2A..00 | Nonpsychotic mental disorders following organic brain damage |
| Eu34112 | [X]Depressive personality disorder                           | Eu14500 | [X]Mental & behav dis due to use cocaine: psychotic disorder |
| E211200 | Depressive personality disorder                              | Eu14000 | [X]Mental & behav dis due to use cocaine: acute intoxication |
| E03y000 | Organic delusional syndrome                                  | Eu60y00 | [X]Other specific personality disorders                      |
| E107z00 | Schizo-affective schizophrenia NOS                           | Eu60z12 | [X]Pathological personality NOS                              |
| Eu12.00 | [X]Mental and behavioural disorders due to use cannabinoids  | E10yz00 | Other schizophrenia NOS                                      |
| Eu19.00 | [X]Men & behav disorder multiple drug use/psychoactive subst | E117000 | Unspecified bipolar affective disorder, unspecified          |
| Ez...00 | Mental disorders NOS                                         | Eu60y13 | [X]Immature personality disorder                             |
| Eu25100 | [X]Schizoaffective disorder, depressive type                 | Eu21.16 | [X]Pseudoneurotic schizophrenia                              |
| E011100 | Korsakov's alcoholic psychosis with peripheral neuritis      | Eu15500 | [X]Mental/behav dis oth stims inc caffeine: psychotic dis    |
| Eu22012 | [X]Paranoid state                                            | Eu23011 | [X]Bouffee delirante                                         |
| Eu2z.00 | [X]Unspecified nonorganic psychosis                          | Eu20011 | [X]Paraphrenic schizophrenia                                 |
| 146D.00 | H/O: manic depressive disorder                               | Eu05z00 | [X]Unspec mental disorder brain damag/dysfunction/physcal dr |
| E11y000 | Unspecified manic-depressive psychoses                       | E2y..00 | Other specified neuroses or other mental disorders           |
| Eu10611 | [X]Korsakov's psychosis, alcohol induced                     | Eu18000 | [X]Mental & behav dis due vol solvents: acute intoxication   |
| Eu23200 | [X]Acute schizophrenia-like psychotic disorder               | Eu60.00 | [X]Specific personality disorders                            |
| Eu24.13 | [X]Induced psychotic disorder                                | E110400 | Single manic episode, severe, with psychosis                 |
| R001400 | [D]Visual hallucinations                                     | Eu34y00 | [X]Other persistent mood affective disorders                 |
| Eu32300 | [X]Severe depressive episode with psychotic symptoms         | Eu22y12 | [X]Involutional paranoid state                               |
| R001000 | [D]Hallucinations, auditory                                  | Eu16.00 | [X]Mental and behavioural disorders due to use hallucinogens |
| Eu30.00 | [X]Manic episode                                             | Eu14200 | [X]Mental and behav dis due to use cocaine: dependence syndr |
| E211100 | Hypomanic personality disorder                               | Eu52800 | [X]Erotomania                                                |
| Eu10500 | [X]Mental & behav dis due to use alcohol: psychotic disorder | Eu12100 | [X]Mental and behav dis due to use cannabinoids: harmful use |
| 225E.00 | O/E - paranoid delusions                                     | Eu60y16 | [X]Psychoneurotic personality disorder                       |
| Eu45211 | [X]Body dysmorphic disorder                                  | E123.11 | Folie a deux                                                 |
| E211300 | Cyclothymic personality disorder                             | Eu11500 | [X]Mental & behav dis due to use opioids: psychotic disorder |
| E12z.00 | Paranoid psychosis NOS                                       | Eu3y000 | [X]Other single mood affective disorders                     |
| 146H.00 | H/O: psychosis                                               | Eu31y12 | [X]Recurrent manic episodes                                  |
| E115.11 | Manic-depressive - now depressed                             | E02y.00 | Other drug psychoses                                         |
| Eu30100 | [X]Mania without psychotic symptoms                          | Eu19300 | [X]Mental and behav dis mlti/oth psychoa sbs:                |

|         |                                                              |         |                                                              |
|---------|--------------------------------------------------------------|---------|--------------------------------------------------------------|
| E11..00 | Affective psychoses                                          | Eu24.00 | [X]Induced delusional disorder                               |
| E110100 | Single manic episode, mild                                   | E103300 | Acute exacerbation of subchronic paranoid schizophrenia      |
| E120.00 | Simple paranoid state                                        | Eu84511 | [X]Autistic psychopathy                                      |
| E212z00 | Schizoid personality disorder NOS                            | E00y.11 | Presbyophrenic psychosis                                     |
| E117.00 | Unspecified bipolar affective disorder                       | E211z00 | Affective personality disorder NOS                           |
| E13z.00 | Nonorganic psychosis NOS                                     | Eu25012 | [X]Schizophreniform psychosis, manic type                    |
| E122.00 | Paraphrenia                                                  | Eu60500 | [X]Anankastic personality disorder                           |
| E211.00 | Affective personality disorder                               | 225F.00 | O/E - delusion of persecution                                |
| E133.00 | Acute paranoid reaction                                      | Eu32312 | [X]Single episode of psychogenic depressive psychosis        |
| F481K00 | Visual hallucinations                                        | Eu18200 | [X]Mental and behav dis due to vol solvents: dependence synd |
| E21z.00 | Personality disorder NOS                                     | E14z.00 | Child psychosis NOS                                          |
| E00y.00 | Other senile and presenile organic psychoses                 | Eu06y00 | [X]Oth organ personality behav disorders brain dis dam dysf  |
| E100000 | Unspecified schizophrenia                                    | E22y500 | Nymphomania                                                  |
| E115000 | Bipolar affective disorder, currently depressed, unspecified | E103400 | Acute exacerbation of chronic paranoid schizophrenia         |
| E1...00 | Non-organic psychoses                                        | Eu60y14 | [X]Narcissistic personality disorder                         |
| E21yz00 | Other personality disorder NOS                               | Eu62013 | [X]Personality change aft prolong captiv+possib/being killed |
| E211000 | Unspecified affective personality disorder                   | E100z00 | Simple schizophrenia NOS                                     |
| E01..00 | Alcoholic psychoses                                          | Ryu5300 | [X]Other hallucinations                                      |
| E02..00 | Drug psychoses                                               | Eu31y00 | [X]Other bipolar affective disorders                         |
| E13y.00 | Other reactive psychoses                                     | Eu84314 | [X]Symbiotic psychosis                                       |
| E13y.00 | Other reactive psychoses                                     | Eu20111 | [X]Disorganised schizophrenia                                |
| E114300 | Bipolar affect disord, currently manic, severe, no psychosis | R001100 | [D]Hallucinations, gustatory                                 |
| E1y..00 | Other specified non-organic psychoses                        | E116400 | Mixed bipolar affective disorder, severe, with psychosis     |
| Eu31300 | [X]Bipolar affect disorder cur epi mild or moderate depressn | Eu21.12 | [X]Borderline schizophrenia                                  |
| Eu20000 | [X]Paranoid schizophrenia                                    | E11z000 | Unspecified affective psychoses NOS                          |
| Eu31000 | [X]Bipolar affective disorder, current episode hypomanic     | Eu34012 | [X]Cycloid personality                                       |
| Eu33315 | [X]Recurrent severe episodes of psychotic depression         | Eu16500 | [X]Mental & behav dis due to hallucinogens: psychotic disord |
| Eu25011 | [X]Schizoaffective psychosis, manic type                     | E116600 | Mixed bipolar affective disorder, in full remission          |
| Eu2..00 | [X]Schizophrenia, schizotypal and delusional disorders       | E03..00 | Transient organic psychoses                                  |
| E114.11 | Manic-depressive - now manic                                 | Eu22111 | [X]Capgras syndrome                                          |
| Eu60513 | [X]Obsessive-compulsive personality disorder                 | Eu22y13 | [X]Paranoia querulans                                        |
| Eu10514 | [X]Alcoholic psychosis NOS                                   | 1BH2.00 | Ideas of reference                                           |
| Eu53111 | [X]Puerperal psychosis NOS                                   | ZV40y00 | [V]Other specified mental or behavioural problem             |
| E130.11 | Psychotic reactive depression                                | E114400 | Bipolar affect disord, currently manic,severe with psychosis |
| 1BH..11 | Delusion                                                     | Eu60y11 | [X]Eccentric personality disorder                            |
| Eu20y13 | [X]Schizophrenifrm psychos NOS                               | E141.00 | Disintegrative psychosis                                     |
| E21y200 | Borderline personality disorder                              | Eu17100 | [X]Mental and behav dis due to use of tobacco: harmful use   |
| E110.11 | Hypomanic psychoses                                          | Eu16300 | [X]Mental and behav dis due hallucinogens: withdrawal state  |
| 212T.00 | Psychosis, schizophrenia + bipolar affective disord resolved | Eu62.00 | [X]Enduring personality change not attrib to brain damag/dis |
| 1B1b.00 | Transient hallucinations                                     | E107500 | Schizo-affective schizophrenia in remission                  |
| R001z00 | [D]Hallucinations NOS                                        | Eu60213 | [X]Asocial personality disorder                              |
| E215100 | Munchausen's syndrome                                        | Eu12200 | [X]Mental and behav dis due to cannabinoids: dependence synd |

|         |                                                              |         |                                                              |
|---------|--------------------------------------------------------------|---------|--------------------------------------------------------------|
| E216.13 | Labile personality                                           | Eu19700 | [X]Men/beh dis mlt drg use/oth subs: resid/late psychot dis  |
| E111000 | Recurrent manic episodes, unspecified                        | Eu8z.00 | [X]Unspecified disorder of psychological development         |
| E2C3200 | Kleptomania                                                  | Z57C611 | Schizophrenic language                                       |
| E21yz11 | Manipulative personality                                     | Eu62011 | [X]Personality change after concentration camp experiences   |
| E110000 | Single manic episode, unspecified                            | E115600 | Bipolar affective disorder, now depressed, in full remission |
| E13..11 | Reactive psychoses                                           | Eu12700 | [X]Mnt/bh dis due cannabinds: resid & late-onset psychot dis |
| E2C3300 | Pyromania                                                    | E114z00 | Bipolar affective disorder, currently manic, NOS             |
| Eu10300 | [X]Mental and behav dis due to use alcohol: withdrawal state | E03z.00 | Transient organic psychoses NOS                              |
| Eu20211 | [X]Catatonic stupor                                          | E100300 | Acute exacerbation of subchronic schizophrenia               |
| Eu20400 | [X]Post-schizophrenic depression                             | Eu03.11 | [X]Korsakov's psychosis, nonalcoholic                        |
| Eu60311 | [X]Aggressive personality disorder                           | Eu25y00 | [X]Other schizoaffective disorders                           |
| E214.00 | Compulsive personality disorders                             | E100500 | Schizophrenia in remission                                   |
| Eu6..00 | [X]Disorders of adult personality and behaviour              | Eu60313 | [X]Explosive personality disorder                            |
| Eu30200 | [X]Mania with psychotic symptoms                             | E102000 | Unspecified catatonic schizophrenia                          |
| E21y700 | Psychoneurotic personality disorder                          | E107000 | Unspecified schizo-affective schizophrenia                   |
| Eu81.00 | [X]Specific developmental disorders of scholastic skills     | E111500 | Recurrent manic episodes, partial or unspecified remission   |
| Eu60000 | [X]Paranoid personality disorder                             | E107300 | Acute exacerbation subchronic schizo-affective schizophrenia |
| Eu23012 | [X]Cycloid psychosis                                         | Eu60714 | [X]Self defeating personality disorder                       |
| Eu34000 | [X]Cyclothymia                                               | Eu18100 | [X]Mental and behav dis due volatile solvents: harmful use   |
| Eu23100 | [X]Acute polymorphic psychot disord with symp of schizophren | E114500 | Bipolar affect disord,currently manic, part/unspec remission |
| E216.12 | Dependent personality                                        | Eu23211 | [X]Brief schizophreniform disorder                           |
| Eu60214 | [X]Psychopathic personality disorder                         | Eu15700 | [X]Mnt/bh dis oth stm inc caffne resid/late-onset psycht dis |
| Eu10100 | [X]Mental and behav dis due to use of alcohol: harmful use   | E03yz00 | Other transient organic psychoses NOS                        |
| Eu0z.11 | [X]Organic psychosis NOS                                     | Eu84512 | [X]Schizoid disorder of childhood                            |
| Eu05200 | [X]Organic delusional [schizophrenia-like] disorder          | Eu06000 | [X]Organic personality disorder                              |
| Eu04.15 | [X]Acute / subacute psycho-organic reaction                  | Eu20300 | [X]Undifferentiated schizophrenia                            |
| ZV11112 | [V]Personal history of manic-depressive psychosis            | E11y.00 | Other and unspecified manic-depressive psychoses             |
| E02y400 | Drug-induced personality disorder                            | E2Az.00 | Nonpsychotic mental disorder post-organic brain damage NOS   |
| ZV11000 | [V]Personal history of schizophrenia                         | E215z00 | Histrionic personality disorder NOS                          |
| E13y000 | Psychogenic stupor                                           | Eu19000 | [X]Mental/behav dis multi drg use/psychoac subs: acute intox |
| E1z..00 | Non-organic psychosis NOS                                    | E107100 | Subchronic schizo-affective schizophrenia                    |
| Eu60512 | [X]Obsessional personality disorder                          | Eu84013 | [X]Infantile psychosis                                       |
| Euz..11 | [X]Mental illness NOS                                        | Eu13300 | [X]Mental and behav dis due seds/hypntcs: withdrawal state   |
| 1BH3.00 | Paranoid ideation                                            | Eu20200 | [X]Catatonic schizophrenia                                   |
| 286..11 | Poor insight into psychotic condition                        | Eu17.00 | [X]Mental and behavioural disorder due to use of tobacco     |
| 1S42.00 | Manic mood                                                   | E212200 | Schizotypal personality                                      |
| Eu0..00 | [X]Organic, including symptomatic, mental disorders          | Eu10700 | [X]Men & behav dis due alcoh: resid & late-onset psychot dis |
| E13y100 | Brief reactive psychosis                                     | E04..00 | Other chronic organic psychoses                              |
| E213.00 | Explosive personality disorder                               | Eu84312 | [X]Disintegrative psychosis                                  |
| E100100 | Subchronic schizophrenia                                     | Eu22100 | [X]Delusional misidentification syndrome                     |
| Eu53z00 | [X]Puerperal mental disorder, unspecified                    | Eu21.14 | [X]Prepsychotic schizophrenia                                |

|         |                                                                 |         |                                                                 |
|---------|-----------------------------------------------------------------|---------|-----------------------------------------------------------------|
| E04y.00 | Other specified chronic organic psychoses                       | E123.00 | Shared paranoid disorder                                        |
| Eu06.00 | [X]Personality and behav disorder brain dis<br>dam and dysfunc  | E2Ay.00 | Other specific mental disorder post-organic brain<br>damage     |
| Eu31400 | [X]Bipol aff disord, curr epis sev depress, no<br>psychot symp  | Eu19100 | [X]Mental and behav dis mlti drg/oth psychoa sbs:<br>harmfl use |
| Eu33311 | [X]Endogenous depression with psychotic<br>symptoms             | E116200 | Mixed bipolar affective disorder, moderate                      |
| E040.11 | Korsakoff's non-alcoholic psychosis                             | E116300 | Mixed bipolar affective disorder, severe, without<br>psychosis  |
| Eu34013 | [X]Cyclothymic personality                                      | E107400 | Acute exacerbation of chronic schizo-affective<br>schizophrenia |
| ZV11111 | [V]Personal history of manic-depressive<br>psychosis            | E116z00 | Mixed bipolar affective disorder, NOS                           |
| E217.00 | Antisocial or sociopathic personality disorder                  | E116500 | Mixed bipolar affective disorder, partial/unspec<br>remission   |
| Eu05300 | [X]Organic mood [affective] disorders                           | E117100 | Unspecified bipolar affective disorder, mild                    |
| Eu84111 | [X]Atypical childhood psychosis                                 | E115400 | Bipolar affect disord, now depressed, severe with<br>psychosis  |
| Eu20511 | [X]Chronic undifferentiated schizophrenia                       | E114600 | Bipolar affective disorder, currently manic, full<br>remission  |
| Eu32313 | [X]Single episode of psychotic depression                       | ZV40200 | [V]Other mental problems                                        |
| Eu32311 | [X]Single episode of major depression and<br>psychotic symptoms | E2A1z00 | Organic personality syndrome NOS                                |
| E113400 | Recurrent major depressive episodes, severe,<br>with psychosis  | E102z00 | Catatonic schizophrenia NOS                                     |
| E117600 | Unspecified bipolar affective disorder, in full<br>remission    | Eu06z00 | [X]Unspec organ personality behav disorder brain dam<br>dysfunc |
| E14y000 | Atypical childhood psychoses                                    | R001300 | [D]Hallucinations, tactile                                      |
| E134.00 | Psychogenic paranoid psychosis                                  | Eu13000 | [X]Mental & behav dis due seds/hypntcs: acute<br>intoxication   |
| Eu04.13 | [X]Acute / subacute infective psychosis                         | Eu20500 | [X]Residual schizophrenia                                       |
| 146Z.00 | H/O: psychiatric disorder NOS                                   | Eu20212 | [X]Schizophrenic catalepsy                                      |
| Eu19500 | [X]Ment/behav dis mlti drug use/oth psyc sbs:<br>psychotc dis   | Eu6y.00 | [X]Other disorders of adult personality and behaviour           |
| E110200 | Single manic episode, moderate                                  | Eu21.13 | [X]Latent schizophrenia                                         |
| E116100 | Mixed bipolar affective disorder, mild                          | Eu22014 | [X]Sensitiver Beziehungswahn                                    |
| Eu53.00 | [X]Mental and behav disorders assoc with the<br>puerperium NEC  | Eu12300 | [X]Mental and behav dis due cannabinoids:<br>withdrawal state   |
| Eu23.00 | [X]Acute and transient psychotic disorders                      | Eu62012 | [X]Personality change after disasters                           |
| Eu04.00 | [X]Delirium, not induced by alcohol+other<br>psychoactive subs  | E111300 | Recurrent manic episodes, severe without mention<br>psychosis   |
| E2A1.00 | Organic personality syndrome                                    | Eu16200 | [X]Mental and behav dis due to hallucinogens:<br>dependence syn |
| ZV40.00 | [V]Mental and behavioural problems                              | Eu22y00 | [X]Other persistent delusional disorders                        |
| E21y.00 | Other personality disorders                                     | Eu31.13 | [X]Manic-depressive reaction                                    |
| Eu8..00 | [X]Disorders of psychological development                       | Eu16000 | [X]Mental & behav dis due hallucinogens: acute<br>intoxicatn    |
| R001200 | [D]Hallucinations, olfactory                                    | E105.00 | Latent schizophrenia                                            |
| E102.00 | Catatonic schizophrenia                                         | E101000 | Unspecified hebephrenic schizophrenia                           |
| Eu54.00 | [X]Psychological/behav factor assoc with<br>disorder or dis EC  | E0y..00 | Other specified organic psychoses                               |
| E02z.00 | Drug psychosis NOS                                              | E14yz00 | Other childhood psychoses NOS                                   |
| E13yz00 | Other reactive psychoses NOS                                    | E12y000 | Paranoia querulans                                              |
| Eu23112 | [X]Cycloid psychosis with symptoms of<br>schizophrenia          | E212000 | Unspecified schizoid personality disorder                       |
| E11..13 | Manic psychoses                                                 | Eu16100 | [X]Mental and behav dis due to use hallucinogens:<br>harmfl use |
| E111.00 | Recurrent manic episodes                                        | Eu14300 | [X]Mental and behav dis due to use cocaine:<br>withdrawal state |

|         |                                                              |         |                                                              |
|---------|--------------------------------------------------------------|---------|--------------------------------------------------------------|
| Eu31100 | [X]Bipolar affect disorder cur epi manic wout psychotic symp | E215300 | Psychoinfantile personality                                  |
| Eu34011 | [X]Affective personality disorder                            | E01z.00 | Alcoholic psychosis NOS                                      |
| Eu21.18 | [X]Schizotypal personality disorder                          | E101500 | Hebephrenic schizophrenia in remission                       |
| E215.00 | Histrionic personality disorders                             | E217.11 | Amoral personality                                           |
| Eu31700 | [X]Bipolar affective disorder, currently in remission        | E133.11 | Bouffe delirante                                             |
| Eu11700 | [X]Men & beh dis due opioids: resid & late-onset psychot dis | E01yz00 | Other alcoholic psychosis NOS                                |
| Eu66.00 | [X]Psychol and behav disorder assoc with sex dev and orienta | E03y.00 | Other transient organic psychoses                            |
| Ey...00 | Other specified mental disorders                             | E117400 | Unspecified bipolar affective disorder,severe with psychosis |
| E111200 | Recurrent manic episodes, moderate                           | E117200 | Unspecified bipolar affective disorder, moderate             |
| Eu02z16 | [X] Senile dementia, depressed or paranoid type              | Eu60013 | [X]Querulant personality disorder                            |
| Eu23312 | [X]Psychogenic paranoid psychosis                            | Eu13500 | [X]Mental & behav dis due to seds/hypntcs: psychotic disordr |
| E21y400 | Eccentric personality disorder                               | E14y100 | Borderline psychosis of childhood                            |
| E115200 | Bipolar affective disorder, currently depressed, moderate    | Eu60412 | [X]Psychoinfantile personality disorder                      |
| Eu02z15 | [X] Senile psychosis NOS                                     | E110600 | Single manic episode in full remission                       |
| Eu60411 | [X]Hysterical personality disorder                           | E11y300 | Other mixed manic-depressive psychoses                       |
| Eu05.00 | [X]Oth mental disorder brain damag/dysfunction/physical disr | E117500 | Unspecified bipolar affect disord, partial/unspec remission  |
| E117z00 | Unspecified bipolar affective disorder, NOS                  | Eu23212 | [X]Brief schizophrenifrm psych                               |
| Eu3y.00 | [X]Other mood affective disorders                            | E21y600 | Masochistic personality disorder                             |
| Eu44.14 | [X]Hysterical psychosis                                      | E11y100 | Atypical manic disorder                                      |
| E21..11 | Neurotic personality disorder                                | Eu21.17 | [X]Pseudopsychopathic schizophrenia                          |
| Eu31200 | [X]Bipolar affect disorder cur epi manic with psychotic symp | Eu60y12 | [X]Haltlose type personality disorder                        |
| Eu22.00 | [X]Persistent delusional disorders                           | E14y.00 | Other childhood psychoses                                    |
| Eu33312 | [X]Manic-depress psychosis,depressed type+psychotic symptoms | E115500 | Bipolar affect disord, now depressed, part/unspec remission  |
| E02yz00 | Other drug psychoses NOS                                     | E100.11 | Schizophrenia simplex                                        |
| Eu32314 | [X]Single episode of reactive depressive psychosis           | E117300 | Unspecified bipolar affective disorder, severe, no psychosis |
| Eu33213 | [X]Manic-depress psychosis,depressd,no psychotic symptoms    | ZVu6K00 | [X]Personal history/other mental and behavioural disorders   |
| Eu3yy00 | [X]Other specified mood affective disorders                  | Eu31y11 | [X]Bipolar II disorder                                       |
| Eu23z12 | [X]Reactive psychosis                                        | ZV11z00 | [V]Personal history of unspecified mental disorder           |
| Eu3y100 | [X]Other recurrent mood affective disorders                  | 212V.00 | Bipolar affective disorder resolved                          |
| E131.00 | Acute hysterical psychosis                                   | 1B1e.00 | Hypnopompic hallucination                                    |
| Eu1..00 | [X]Mental and behavioural disorders due to psychoactive subs | 212X.00 | Psychosis resolved                                           |
| ZV11.00 | [V]Personal history of mental disorder                       | Eu1A100 | [X]Mental behav disorders due use crack cocaine: harmful use |
| ZRby100 | Profile of mood states, bipolar                              | 1B1d.00 | Hypnagogic hallucination                                     |
| E214000 | Anankastic personality                                       | Eu62z00 | [X]Enduring personality change, unspecified                  |
| Eu66y00 | [X]Other psychosexual development disorders                  | 212W.00 | Schizophrenia resolved                                       |
| Eu61.00 | [X]Mixed and other personality disorders                     | Eu21.11 | [X]Latent schizophrenic reaction                             |
| E101.00 | Hebephrenic schizophrenia                                    | Eu20311 | [X]Atypical schizophrenia                                    |
| Eu3y011 | [X]Mixed affective episode                                   | E10y.11 | Cenesthopathic schizophrenia                                 |
| Eu2y.00 | [X]Other nonorganic psychotic disorders                      | Eu13100 | [X]Mental and behav dis due to use seds/hypntcs: harmful use |
| ZV71000 | [V]Observation for mental disorder                           | ZV11y00 | [V]Personal history of other specified mental disorder       |
| Eu6y111 | [X] Munchausens syndrome                                     | Eu06011 | [X]Organic pseudopsychopathic personality                    |
| E116.00 | Mixed bipolar affective disorder                             | Eu20y12 | [X]Schizophreniform disord NOS                               |

|         |                                                              |         |                                                              |
|---------|--------------------------------------------------------------|---------|--------------------------------------------------------------|
| E103200 | Chronic paranoid schizophrenia                               | E105200 | Chronic latent schizophrenia                                 |
| E12yz00 | Other paranoid states NOS                                    | Eu23214 | [X]Schizophrenic reaction                                    |
| Eu20214 | [X]Schizophrenic flexibilatis cerea                          | E105500 | Latent schizophrenia in remission                            |
| E116000 | Mixed bipolar affective disorder, unspecified                | Eu12600 | [X]Mental and behav dis due to use cannabinoids: amnesic syn |
| E12y.00 | Other paranoid states                                        | Eu05z12 | [X]Organic mental disorder NOS                               |
| Eu60200 | [X]Dissocial personality disorder                            | E101400 | Acute exacerbation of chronic hebephrenic schizophrenia      |
| Eu3z.11 | [X]Affective psychosis NOS                                   | Eu32800 | [X]Major depression, severe with psychotic symptoms          |
| ZV40.12 | [V]Mental problems                                           | Eu18500 | [X]Mental & behav dis due to vol solvents: psychotic disordr |
| Eu23z11 | [X]Brief reactive psychosis NOS                              | Eu22200 | [X]Cotard syndrome                                           |
| Eu18.00 | [X]Mental & behav disorders due to use of volatile solvents  | E107.11 | Cyclic schizophrenia                                         |
| Eu2y.11 | [X]Chronic hallucinatory psychosis                           | E10y100 | Coenesthopathic schizophrenia                                |
| Eu33314 | [X]Recurr severe episodes/psychogenic depressive psychosis   | E102100 | Subchronic catatonic schizophrenia                           |
| Eu60312 | [X]Borderline personality disorder                           | Eu94211 | [X]Affectionless psychopathy                                 |
| Eu62015 | [X]Personality change after torture                          | Eu3y200 | [X]Premenstrual dysphoric disorder                           |
| Eu60700 | [X]Dependent personality disorder                            | 14g..00 | History of developmental disorder                            |
| Eu05212 | [X]Schizophrenia-like psychosis in epilepsy                  | L184400 | Mental disorder in puerperium - baby previously delivered    |
| E13..00 | Other nonorganic psychoses                                   | Eu32900 | [X]Single major depr ep, severe with psych, psych in remiss  |
| Eu14.00 | [X]Mental and behavioural disorders due to use of cocaine    | Eu32A00 | [X]Recurr major depr ep, severe with psych, psych in remiss  |
| Eu30y00 | [X]Other manic episodes                                      | Eu17300 | [X]Mental and behav dis due to use tobacco: withdrawal state |
| E112400 | Single major depressive episode, severe, with psychosis      | Eu22300 | [X]Paranoid state in remission                               |
| E100.00 | Simple schizophrenia                                         | Eu1A300 | [X]Mental behav disord due crack cocaine: withdrawal state   |
| E111400 | Recurrent manic episodes, severe, with psychosis             | Eu26.00 | [X]Nonorganic psychosis in remission                         |
| Eu1A.00 | [X]Mental and behavioural disorders due use of crack cocaine | E105000 | Unspecified latent schizophrenia                             |
| Eu60212 | [X]Antisocial personality disorder                           | E102500 | Catatonic schizophrenia in remission                         |
| 1BH1.00 | Grandiose delusions                                          | E105z00 | Latent schizophrenia NOS                                     |
| Eu33313 | [X]Recurr severe episodes/major depression+psychotic symptom | Eu1A500 | [X]Mental behav disord due crack cocaine: psychotic disorder |
| E10y000 | Atypical schizophrenia                                       | Eu1A200 | [X]Mental behav disorders due use crack cocaine: depend synd |
| E103000 | Unspecified paranoid schizophrenia                           | Eu14700 | [X]Men & beh dis due cocaine: resid & late-onset psychot dis |
| Eu25z11 | [X]Schizoaffective psychosis NOS                             | L184200 | Mental disorder in the puerperium - baby delivered           |
| E11zz00 | Other affective psychosis NOS                                | Eu31900 | [X]Bipolar affective disorder type II                        |
| E11yz00 | Other and unspecified manic-depressive psychoses NOS         | Eu11600 | [X]Mental and behav dis due to use opioids: amnesic syndrome |
| Eu15200 | [X]Mental and behav dis oth stim inc caffein: dependnce synd | Eu31911 | [X]Bipolar II disorder                                       |
| E01y.00 | Other alcoholic psychosis                                    | Eu31800 | [X]Bipolar affective disorder type I                         |
| Eu25200 | [X]Schizoaffective disorder, mixed type                      | E103100 | Subchronic paranoid schizophrenia                            |
| E00..00 | Senile and presenile organic psychotic conditions            | Eu25211 | [X]Cyclic schizophrenia                                      |
| Eu60713 | [X]Passive personality disorder                              | Eu60211 | [X]Amoral personality disorder                               |
| Eu31z00 | [X]Bipolar affective disorder, unspecified                   | Eu16700 | [X]Mnt/bh dis due hallucngns: resid & late-onset psychot dis |
| E2Fz.00 | Developmental disorder NOS                                   | Eu24.11 | [X]Folie a deux                                              |
| Eu25000 | [X]Schizoaffective disorder, manic type                      | Eu19600 | [X]Mental/behav dis multi drg use/oth psy sbs:               |

|         |                                                              |               |         |                                                              |
|---------|--------------------------------------------------------------|---------------|---------|--------------------------------------------------------------|
| Eu23z00 | [X]Acute and transient psychotic disorder, unspecified       | amnesic syndr | E102400 | Acute exacerbation of chronic catatonic schizophrenia        |
| Eu20.00 | [X]Schizophrenia                                             |               | Eu8z.11 | [X]Psychological developmental disorder NOS                  |
| Eu11200 | [X]Mental and behav dis due to use opioids: dependence syndr |               | Eu17200 | [X]Mental and behav dis due to use tobacco: dependence syndr |
| Eu22000 | [X]Delusional disorder                                       |               | E21y000 | Narcissistic personality disorder                            |
| E214z00 | Compulsive personality disorder NOS                          |               | E115z00 | Bipolar affective disorder, currently depressed, NOS         |
| Eu62y11 | [X]Chronic pain personality syndrome                         |               | Eu12000 | [X]Mental & behav dis due cannabinoids: acute intoxication   |
| Eu6yy00 | [X]Other specified disorders of adult personality/behaviour  |               | E14z.11 | Childhood schizophrenia NOS                                  |
| Eu20z00 | [X]Schizophrenia, unspecified                                |               | Eu62100 | [X]Enduring personality change after psychiatric illness     |
| Eu2..00 | [X]Mental disorder, not otherwise specified                  |               | Eu11100 | [X]Mental and behav dis due to use of opioids: harmful use   |
| Eu62y00 | [X]Other enduring personality changes                        |               | Eu25212 | [X]Mixed schizophrenic and affective psychosis               |
| Eu25111 | [X]Schizoaffective psychosis, depressive type                |               | Eu6y000 | [X]Elaboration of physical symptoms for psychological reason |
| E115300 | Bipolar affect disord, now depressed, severe, no psychosis   |               | Eu25z00 | [X]Schizoaffective disorder, unspecified                     |
| E21y100 | Avoidant personality disorder                                |               | Eu33316 | [X]Recurrent severe episodes/reactive depressive psychosis   |
| E115100 | Bipolar affective disorder, currently depressed, mild        |               | Eu60712 | [X]Inadequate personality disorder                           |
| E114000 | Bipolar affective disorder, currently manic, unspecified     |               | E106.00 | Residual schizophrenia                                       |
| E21y300 | Passive-aggressive personality disorder                      |               | Eu60511 | [X]Compulsive personality disorder                           |
| Eu20600 | [X]Simple schizophrenia                                      |               | Eu60100 | [X]Schizoid personality disorder                             |
| Eu20213 | [X]Schizophrenic catatonia                                   |               | Eu12500 | [X]Mental & behav dis due to cannabinoids: psychotic disordr |
| E213.12 | Quarrelsome personality                                      |               | E212100 | Introverted personality                                      |
| E114100 | Bipolar affective disorder, currently manic, mild            |               | E10y.00 | Other schizophrenia                                          |
| E103500 | Paranoid schizophrenia in remission                          |               | ZS34.00 | Developmental disorder of scholastic skill                   |
| Eu11300 | [X]Mental and behav dis due to use opioids: withdrawal state |               | Eu21.00 | [X]Schizotypal disorder                                      |
| E110z00 | Manic disorder, single episode NOS                           |               | Eu10200 | [X]Mental and behav dis due to use alcohol: dependence syndr |
| Eu23000 | [X]Acute polymorphic psychot disord without symp of schizoph |               | Eu3z.00 | [X]Unspecified mood affective disorder                       |
| E0z..00 | Organic psychoses NOS                                        |               | Eu30211 | [X]Mania with mood-congruent psychotic symptoms              |
| E110.00 | Manic disorder, single episode                               |               | E111600 | Recurrent manic episodes, in full remission                  |



## ALCOHOL AND DRUG DEPENDENCE

---

**At least one ICD-9 in:**

- 303 Alcohol dependence syndrome
- 305.00 Non dependent alcohol abuse
  - 305.00 Alcohol abuse, unspecified
  - 305.01 Alcohol abuse, continuous
  - 305.03** Alcohol abuse, episodic
  - 305.03 Alcohol abuse, in remission
- 304 Drug dependence
  - 304.0 Opioid type dependence
  - 304.1 Sedative, hypnotic or anxiolytic dependence
  - 304.2 Cocaine dependence
  - 304.3 Cannabis dependence
  - 304.4 Amphetamine and other psychostimulant dependence
  - 304.5 Hallucinogen dependence
  - 304.6 Other specified drug dependence
  - 304.7 Combinations of opioid type drug with any other drug dependence
  - 304.8 Combinations of drug dependence excluding opioid type drug
  - 304.9 Unspecified drug dependence

OR

**At least one ICD-10 in:**

- F10 Alcohol related disorders
  - F10.0 acute intoxication
  - F10.1 harmful use
  - F10.2 dependence syndrome
  - F10.3 withdrawal state
  - F10.4 withdrawal state with delirium
  - F10.5 psychotic disorder
  - F10.6 amnesic syndrome
  - F10.7 Residual and late-onset psychotic disorder
  - F10.8 other mental and behavioural disorder
  - F10.9 unspecified mental and behavioural disorder
- F11 Opioids related disorders
- F12 Cannabis related disorders
- F13 Sedative, hypnotic, or anxiolytic related disorders
- F14 Cocaine related disorders
- F15 Other stimulant related disorders
- F16 Hallucinogen related disorders
- F17 Nicotine dependence
- F18 Inhalant related disorders
- F19 Other psychoactive substance related disorders

OR

**At least one READ code in:**

|         |                                                  |         |                                                          |
|---------|--------------------------------------------------|---------|----------------------------------------------------------|
| 136..00 | Alcohol consumption                              | E245z00 | Hallucinogen dependence NOS                              |
| 136K.00 | Alcohol intake above recommended sensible limits | E246.00 | Glue sniffing dependence                                 |
| 136S.00 | Hazardous alcohol use                            | E246000 | Glue sniffing dependence, unspecified                    |
| 136T.00 | Harmful alcohol use                              | E246100 | Glue sniffing dependence, continuous                     |
| 136W.00 | Alcohol misuse                                   | E246200 | Glue sniffing dependence, episodic                       |
| 136Z.00 | Alcohol consumption NOS                          | E246300 | Glue sniffing dependence in remission                    |
| 13c..00 | Drug user                                        | E246z00 | Glue sniffing dependence NOS                             |
| 13c0.00 | Injecting drug user                              | E247.00 | Other specified drug dependence                          |
| 13c1.00 | Intravenous drug user                            | E247.11 | Absinthe addiction                                       |
| 13c2.00 | Never injecting drug user                        | E247000 | Other specified drug dependence, unspecified             |
| 13c3.00 | Intramuscular drug user                          | E247100 | Other specified drug dependence, continuous              |
| 13c4.00 | Intranasal drug user                             | E247200 | Other specified drug dependence, episodic                |
| 13c7.00 | Current drug user                                | E247300 | Other specified drug dependence in remission             |
| 13c9.00 | Subcutaneous drug user                           | E247z00 | Other specified drug dependence NOS                      |
| 13cA.00 | Smokes drugs                                     | E248.00 | Combined opioid with other drug dependence               |
| 13cB.00 | Misuses drugs orally                             | E248000 | Combined opioid with other drug dependence, unspecified  |
| 13cC.00 | Continuous use of drugs                          | E248100 | Combined opioid with other drug dependence, continuous   |
| 13cD.00 | Episodic use of drugs                            | E248200 | Combined opioid with other drug dependence, episodic     |
| 13cE.00 | Prolonged high dose use of cannabis              | E248300 | Combined opioid with other drug dependence in remission  |
| 13cH.00 | Persistent substance misuse                      | E248z00 | Combined opioid with other drug dependence NOS           |
| 13cJ.00 | Previously injecting drug user                   | E249.00 | Combined drug dependence, excluding opioids              |
| 13cK.00 | Current non recreational drug user               | E249000 | Combined drug dependence, excluding opioid, unspecified  |
| 1462.00 | H/O: alcoholism                                  | E249100 | Combined drug dependence, excluding opioid, continuous   |
| 1463.00 | H/O: drug dependency                             | E249200 | Combined drug dependence, excluding opioid, episodic     |
| 146E.00 | H/O: recreational drug use                       | E249300 | Combined drug dependence, excluding opioid, in remission |
| 146F.00 | H/O: drug abuse                                  | E249z00 | Combined drug dependence, excluding opioid, NOS          |
| 1B1c.00 | Alcohol induced hallucinations                   | E24A.00 | Ecstasy type drug dependence                             |
| 1P30.00 | Compulsive uncontrollable drug taking            | E24z.00 | Drug dependence NOS                                      |
| 1P31.00 | Compulsive drug taking                           | E250.11 | Drunkenness NOS                                          |
| 1P6..00 | Craving for drugs                                | E250.12 | Hangover (alcohol)                                       |
| 1P62.00 | Abnormal craving for drugs                       | E250.13 | Inebriety NOS                                            |
| 1T...00 | History of substance misuse                      | E250.14 | Intoxication - alcohol                                   |
| 1T0..00 | H/O heroin misuse                                | E254.11 | Barbiturate abuse                                        |
| 1T00.00 | H/O daily heroin misuse                          | E254.12 | Hypnotic or anxiolytic abuse                             |
| 1T01.00 | H/O weekly heroin misuse                         | E254.13 | Sedative abuse                                           |
| 1T02.00 | Previous history of heroin misuse                | E254.14 | Tranquilliser abuse                                      |
| 1T03.00 | H/O infrequent heroin misuse                     | E257.11 | Psychostimulant abuse                                    |
| 1T1..00 | H/O methadone misuse                             | E257.12 | Stimulant abuse                                          |
| 1T10.00 | H/O daily methadone misuse                       | E259400 | Misuse of prescription only drugs                        |
| 1T11.00 | H/O weekly methadone misuse                      | E25y.11 | Analgesic abuse                                          |
| 1T12.00 | H/O infrequent methadone misuse                  | E25y.12 | Laxative abuse                                           |
| 1T13.00 | Previous history of methadone misuse             | E25y.13 | Steroid abuse                                            |

|         |                                           |         |                                                                |
|---------|-------------------------------------------|---------|----------------------------------------------------------------|
| 1T2.00  | H/O ecstasy misuse                        | E25z.00 | Misuse of drugs NOS                                            |
| 1T20.00 | H/O daily ecstasy misuse                  | Eu1..00 | [X]Mental and behavioural disorders due to psychoactive subs   |
| 1T21.00 | H/O weekly ecstasy misuse                 | Eu10.00 | [X]Mental and behavioural disorders due to use of alcohol      |
| 1T22.00 | H/O infrequent ecstasy misuse             | Eu10000 | [X]Mental & behav dis due to use alcohol: acute intoxication   |
| 1T23.00 | Previous history of ecstasy misuse        | Eu10011 | [X]Acute alcoholic drunkenness                                 |
| 1T3..00 | H/O benzodiazepine misuse                 | Eu10100 | [X]Mental and behav dis due to use of alcohol: harmful use     |
| 1T30.00 | H/O daily benzodiazepine misuse           | Eu10200 | [X]Mental and behav dis due to use alcohol: dependence syndr   |
| 1T31.00 | H/O weekly benzodiazepine misuse          | Eu10211 | [X]Alcohol addiction                                           |
| 1T32.00 | H/O infrequent benzodiazepine misuse      | Eu10212 | [X]Chronic alcoholism                                          |
| 1T33.00 | Previous history of benzodiazepine misuse | Eu10213 | [X]Dipsomania                                                  |
| 1T4..00 | H/O amphetamine misuse                    | Eu10300 | [X]Mental and behav dis due to use alcohol: withdrawal state   |
| 1T40.00 | H/O daily amphetamine misuse              | Eu10400 | [X]Men & behav dis due alcohol: withdrawal state with delirium |
| 1T41.00 | H/O weekly amphetamine misuse             | Eu10411 | [X]Delirium tremens, alcohol induced                           |
| 1T42.00 | H/O infrequent amphetamine misuse         | Eu10500 | [X]Mental & behav dis due to use alcohol: psychotic disorder   |
| 1T43.00 | Previous history of amphetamine misuse    | Eu10511 | [X]Alcoholic hallucinosis                                      |
| 1T5..00 | H/O cocaine misuse                        | Eu10512 | [X]Alcoholic jealousy                                          |
| 1T50.00 | H/O daily cocaine misuse                  | Eu10513 | [X]Alcoholic paranoia                                          |
| 1T51.00 | H/O weekly cocaine misuse                 | Eu10514 | [X]Alcoholic psychosis NOS                                     |
| 1T52.00 | H/O infrequent cocaine misuse             | Eu10600 | [X]Mental and behav dis due to use alcohol: amnesic syndrome   |
| 1T53.00 | Previous history of cocaine misuse        | Eu10611 | [X]Korsakov's psychosis, alcohol induced                       |
| 1T6..00 | H/O crack cocaine misuse                  | Eu10700 | [X]Men & behav dis due alcohol: resid & late-onset psychot dis |
| 1T60.00 | H/O daily crack cocaine misuse            | Eu10711 | [X]Alcoholic dementia NOS                                      |
| 1T61.00 | H/O weekly crack cocaine misuse           | Eu10712 | [X]Chronic alcoholic brain syndrome                            |
| 1T62.00 | H/O infrequent crack cocaine misuse       | Eu10800 | [X]Alcohol withdrawal-induced seizure                          |
| 1T63.00 | Previous history of crack cocaine misuse  | Eu10y00 | [X]Men & behav dis due to use alcohol: oth men & behav dis     |
| 1T7..00 | H/O hallucinogen misuse                   | Eu10z00 | [X]Ment & behav dis due use alcohol: unsp ment & behav dis     |
| 1T73.00 | Previous history of hallucinogen misuse   | Eu11.00 | [X]Mental and behavioural disorders due to use of opioids      |
| 1T8..00 | H/O cannabis misuse                       | Eu11000 | [X]Mental & behav dis due to use opioids: acute intoxication   |
| 1T80.00 | H/O daily cannabis misuse                 | Eu11100 | [X]Mental and behav dis due to use of opioids: harmful use     |
| 1T81.00 | H/O weekly cannabis misuse                | Eu11200 | [X]Mental and behav dis due to use opioids: dependence syndr   |
| 1T82.00 | H/O infrequent cannabis misuse            | Eu11211 | [X]Drug addiction - opioids                                    |
| 1T83.00 | Previous history of cannabis misuse       | Eu11212 | [X]Heroin addiction                                            |
| 1T9..00 | H/O solvent misuse                        | Eu11300 | [X]Mental and behav dis due to use opioids: withdrawal state   |
| 1T90.00 | H/O daily solvent misuse                  | Eu11311 | [X]Cold turkey, opiate withdrawal                              |
| 1T91.00 | H/O weekly solvent misuse                 | Eu11400 | [X]Men & behav dis due opioid: withdrawal state with delirium  |
| 1T93.00 | Previous history of solvent misuse        | Eu11500 | [X]Mental & behav dis due to use opioids: psychotic disorder   |
| 1TA..00 | H/O barbiturate misuse                    | Eu11600 | [X]Mental and behav dis due to use opioids: amnesic syndrome   |
| 1TB..00 | H/O major tranquilliser misuse            | Eu11700 | [X]Men & beh dis due opioids: resid & late-onset psychot dis   |

|         |                                            |         |                                                              |
|---------|--------------------------------------------|---------|--------------------------------------------------------------|
| 1TB0.00 | H/O daily major tranquilliser misuse       | Eu11y00 | [X]Men & behav dis due to use opioids: oth men & behav dis   |
| 1TC..00 | H/O anti-depressant misuse                 | Eu11z00 | [X]Ment & behav dis due use opioids: unsp ment & behav dis   |
| 1TC0.00 | H/O daily anti-depressant misuse           | Eu12.00 | [X]Mental and behavioural disorders due to use cannabinoids  |
| 1TC3.00 | Previous history of anti-depressant misuse | Eu12000 | [X]Mental & behav dis due cannabinoids: acute intoxication   |
| 1TD..00 | H/O opiate misuse                          | Eu12100 | [X]Mental and behav dis due to use cannabinoids: harmful use |
| 1TD0.00 | H/O daily opiate misuse                    | Eu12200 | [X]Mental and behav dis due to cannabinoids: dependence synd |
| 1TD1.00 | H/O weekly opiate misuse                   | Eu12211 | [X]Drug addiction - cannabis                                 |
| 1TD2.00 | H/O infrequent opiate misuse               | Eu12300 | [X]Mental and behav dis due cannabinoids: withdrawal state   |
| 1TD3.00 | Previous history of opiate misuse          | Eu12500 | [X]Mental & behav dis due to cannabinoids: psychotic disordr |
| 1TE..00 | Uses heroin on top of substitution therapy | Eu12600 | [X]Mental and behav dis due to use cannabinoids: amnesic syn |
| 1V...00 | Drug misuse behaviour                      | Eu12700 | [X]Mnt/bh dis due cannabinds: resid & late-onset psychot dis |
| 1V0..00 | Misuses drugs                              | Eu12y00 | [X]Men/behav dis due to use cannabinoids: oth men/behav disd |
| 1V01.00 | Long-term drug misuser                     | Eu12z00 | [X]Ment/behav dis due use cannabinoids: unsp ment/behav disd |
| 1V02.00 | Poly-drug misuser                          | Eu13.00 | [X]Mental and behavioural dis due use sedatives/hypnotics    |
| 1V08.00 | Smokes drugs in cigarette form             | Eu13000 | [X]Mental & behav dis due seds/hypntcs: acute intoxication   |
| 1V09.00 | Smokes drugs through a pipe                | Eu13100 | [X]Mental and behav dis due to use seds/hypntcs: harmful use |
| 1V0A.00 | Chases the dragon                          | Eu13200 | [X]Mental and behav dis due to seds/hypntcs: dependence synd |
| 1V0B.00 | Sniffs drugs                               | Eu13211 | [X]Drug addiction- sedative / hypnotics                      |
| 1V0C.00 | Drug addict                                | Eu13300 | [X]Mental and behav dis due seds/hypntcs: withdrawal state   |
| 1V0E.00 | Health problem secondary to drug misuse    | Eu13400 | [X]Men & beh dis due seds/hypns: withdrwl state wth delirium |
| 1V26.00 | Misused drugs in past                      | Eu13500 | [X]Mental & behav dis due to seds/hypntcs: psychotic disordr |
| 1V3..00 | Drug injection behaviour                   | Eu14.00 | [X]Mental and behavioural disorders due to use of cocaine    |
| 1V4..00 | Priority of drug-related activities        | Eu14000 | [X]Mental & behav dis due to use cocaine: acute intoxication |
| 1V5..00 | Routine of drug-related activities         | Eu14100 | [X]Mental and behav dis due to use of cocaine: harmful use   |
| 1V6..00 | Drug-related offending behaviour           | Eu14200 | [X]Mental and behav dis due to use cocaine: dependence syndr |
| 1V64.00 | Illicit drug use                           | Eu14211 | [X]Drug addiction - cocaine                                  |
| 1V65.00 | Heroin misuse                              | Eu14300 | [X]Mental and behav dis due to use cocaine: withdrawal state |
| 1V66.00 | Ecstasy misuse                             | Eu14500 | [X]Mental & behav dis due to use cocaine: psychotic disorder |
| 222N.00 | O/E - signs of drug withdrawal             | Eu14700 | [X]Men & beh dis due cocaine: resid & late-onset psychot dis |
| C150500 | Alcohol-induced pseudo-Cushing's syndrome  | Eu15.00 | [X]Mental & behav disorder due other stimulants inc caffein  |
| E01..00 | Alcoholic psychoses                        | Eu15000 | [X]Mnt/beh dis due oth stim inc caffein: acute intoxication  |
| E010.00 | Alcohol withdrawal delirium                | Eu15100 | [X]Ment/behav dis due to use oth stims inc caff: harmful use |

|         |                                                         |         |                                                               |
|---------|---------------------------------------------------------|---------|---------------------------------------------------------------|
| E010.11 | DTs - delirium tremens                                  | Eu15200 | [X]Mental and behav dis oth stim inc caffein: dependnce synd  |
| E010.12 | Delirium tremens                                        | Eu15211 | [X]Drug addiction-other stimul                                |
| E011.00 | Alcohol amnestic syndrome                               | Eu15300 | [X]Mnt/behav dis other stimInts inc caffeine: withdrwl state  |
| E011000 | Korsakov's alcoholic psychosis                          | Eu15500 | [X]Mental/behav dis oth stims inc caffeine: psychotic dis     |
| E011100 | Korsakov's alcoholic psychosis with peripheral neuritis | Eu15700 | [X]Mnt/bh dis oth stm inc caffne resid/late-onset psycht dis  |
| E011z00 | Alcohol amnestic syndrome NOS                           | Eu15z00 | [X]Ment/beh dis oth stims inc caffeine: unsp ment/behav disd  |
| E012.00 | Other alcoholic dementia                                | Eu16.00 | [X]Mental and behavioural disorders due to use hallucinogens  |
| E012.11 | Alcoholic dementia NOS                                  | Eu16000 | [X]Mental & behav dis due hallucinogens: acute intoxicatn     |
| E012000 | Chronic alcoholic brain syndrome                        | Eu16100 | [X]Mental and behav dis due to use hallucinogens: harmfl use  |
| E013.00 | Alcohol withdrawal hallucinosis                         | Eu16200 | [X]Mental and behav dis due to hallucinogens: dependence syn  |
| E014.00 | Pathological alcohol intoxication                       | Eu16211 | [X]Drug addiction - hallucinogen                              |
| E015.00 | Alcoholic paranoia                                      | Eu16300 | [X]Mental and behav dis due hallucinogens: withdrawal state   |
| E01y.00 | Other alcoholic psychosis                               | Eu16500 | [X]Mental & behav dis due to hallucinogens: psychotic disord  |
| E01y000 | Alcohol withdrawal syndrome                             | Eu16700 | [X]Mnt/bh dis due hallucngns: resid & late-onset psychot dis  |
| E01yz00 | Other alcoholic psychosis NOS                           | Eu16711 | [X]Post hallucinogen perception disorder                      |
| E01z.00 | Alcoholic psychosis NOS                                 | Eu16z00 | [X]Ment/behav dis due use hallucinogens: unsp ment/behav dis  |
| E02..00 | Drug psychoses                                          | Eu18.00 | [X]Mental & behav disorders due to use of volatile solvents   |
| E020.00 | Drug withdrawal syndrome                                | Eu18000 | [X]Mental & behav dis due vol solvents: acute intoxication    |
| E021.00 | Drug-induced paranoia or hallucinatory states           | Eu18100 | [X]Mental and behav dis due volatile solvents: harmful use    |
| E021000 | Drug-induced paranoid state                             | Eu18200 | [X]Mental and behav dis due to vol solvents: dependence synd  |
| E021100 | Drug-induced hallucinosis                               | Eu18211 | [X]Drug addiction - solvent                                   |
| E021z00 | Drug-induced paranoia or hallucinatory state NOS        | Eu18400 | [X]Men & beh dis vol solvents: withdrawal state wth delirium  |
| E022.00 | Pathological drug intoxication                          | Eu18500 | [X]Mental & behav dis due to vol solvents: psychotic disordr  |
| E023.00 | Nicotine withdrawal                                     | Eu18z00 | [X]Ment/behav dis due use vol solvents: unsp ment/behav dis   |
| E02y.00 | Other drug psychoses                                    | Eu19.00 | [X]Men & behav disorder multiple drug use/psychoactive subst  |
| E02y000 | Drug-induced delirium                                   | Eu19000 | [X]Mental/behav dis multi drg use/psychoac subs: acute intox  |
| E02y100 | Drug-induced dementia                                   | Eu19100 | [X]Mental and behav dis mlti drg/oth psychoa sbs: harmfl use  |
| E02y300 | Drug-induced depressive state                           | Eu19200 | [X]Mental and behav dis mlti/oth psych sbs: dependence syndr  |
| E02y400 | Drug-induced personality disorder                       | Eu19211 | [X]Drug addiction NOS                                         |
| E02yz00 | Other drug psychoses NOS                                | Eu19300 | [X]Mental and behav dis mlti/oth psychoa sbs: withdrwl state  |
| E02z.00 | Drug psychosis NOS                                      | Eu19400 | [X]Mnt/bh dis mlti drg use/oth psy sbs: withdr state + dlrium |
| E040.11 | Korsakoff's non-alcoholic psychosis                     | Eu19500 | [X]Ment/behav dis mlti drug use/oth psyc sbs: psychotc dis    |
| E23..00 | Alcohol dependence syndrome                             | Eu19600 | [X]Mental/behav dis multi drg use/oth psy sbs:                |

|         |                                                          |         |                                                                              |
|---------|----------------------------------------------------------|---------|------------------------------------------------------------------------------|
| E23..11 | Alcoholism                                               | Eu19700 | amnesic syndr<br>[X]Men/beh dis mlt drg use/oth subs: resid/late psychot dis |
| E23..12 | Alcohol problem drinking                                 | Eu19y00 | [X]Men/beh dis mlt drg use/oth psy sbs: oth men & behav dis                  |
| E230.00 | Acute alcoholic intoxication in alcoholism               | Eu19z00 | [X]Ment/beh dis multi drug use/oth psy sbs unsp mnt/beh dis                  |
| E230.11 | Alcohol dependence with acute alcoholic intoxication     | Eu1A.00 | [X]Mental and behavioural disorders due use of crack cocaine                 |
| E230000 | Acute alcoholic intoxication, unspecified, in alcoholism | Eu1A000 | [X]Ment behav dis due use crack cocaine: acute intoxication                  |
| E230100 | Continuous acute alcoholic intoxication in alcoholism    | Eu1A100 | [X]Mental behav disorders due use crack cocaine: harmful use                 |
| E230200 | Episodic acute alcoholic intoxication in alcoholism      | Eu1A200 | [X]Mental behav disorders due use crack cocaine: depend synd                 |
| E230300 | Acute alcoholic intoxication in remission, in alcoholism | Eu1A300 | [X]Mental behav disord due crack cocaine: withdrawal state                   |
| E230z00 | Acute alcoholic intoxication in alcoholism NOS           | Eu1A500 | [X]Mental behav disord due crack cocaine: psychotic disorder                 |
| E231.00 | Chronic alcoholism                                       | Eu1Az00 | [X]Ment behav dis due crack cocaine: unsp ment and behav dis                 |
| E231.11 | Dipsomania                                               | F11x000 | Cerebral degeneration due to alcoholism                                      |
| E231000 | Unspecified chronic alcoholism                           | F11x011 | Alcoholic encephalopathy                                                     |
| E231100 | Continuous chronic alcoholism                            | F144000 | Cerebellar ataxia due to alcoholism                                          |
| E231200 | Episodic chronic alcoholism                              | F25B.00 | Alcohol-induced epilepsy                                                     |
| E231300 | Chronic alcoholism in remission                          | F375.00 | Alcoholic polyneuropathy                                                     |
| E231z00 | Chronic alcoholism NOS                                   | F394000 | Drug-induced myopathy                                                        |
| E23z.00 | Alcohol dependence syndrome NOS                          | F394100 | Alcoholic myopathy                                                           |
| E24..00 | Drug dependence                                          | G555.00 | Alcoholic cardiomyopathy                                                     |
| E24..11 | Drug addiction                                           | G852300 | Oesophageal varices in alcoholic cirrhosis of the liver                      |
| E240.00 | Opioid type drug dependence                              | J153.00 | Alcoholic gastritis                                                          |
| E240.11 | Heroin dependence                                        | J610.00 | Alcoholic fatty liver                                                        |
| E240.12 | Methadone dependence                                     | J611.00 | Acute alcoholic hepatitis                                                    |
| E240.13 | Morphine dependence                                      | J612.00 | Alcoholic cirrhosis of liver                                                 |
| E240.14 | Opium dependence                                         | J612000 | Alcoholic fibrosis and sclerosis of liver                                    |
| E240000 | Unspecified opioid dependence                            | J613.00 | Alcoholic liver damage unspecified                                           |
| E240100 | Continuous opioid dependence                             | J613000 | Alcoholic hepatic failure                                                    |
| E240200 | Episodic opioid dependence                               | J617.00 | Alcoholic hepatitis                                                          |
| E240300 | Opioid dependence in remission                           | J617000 | Chronic alcoholic hepatitis                                                  |
| E240z00 | Opioid drug dependence NOS                               | J61y.00 | Other non-alcoholic chronic liver disease                                    |
| E241.00 | Hypnotic or anxiolytic dependence                        | J670800 | Alcohol-induced acute pancreatitis                                           |
| E241.11 | Anxiolytic dependence                                    | J671000 | Alcohol-induced chronic pancreatitis                                         |
| E241.12 | Barbiturate dependence                                   | L183.00 | Drug dependence in pregnancy, childbirth and the puerperium                  |
| E241.13 | Benzodiazepine dependence                                | L183.11 | Pregnancy and drug dependence                                                |
| E241.14 | Diazepam dependence                                      | L183100 | Drug dependence during pregnancy - baby delivered                            |
| E241.15 | Librium dependence                                       | L183300 | Drug dependence during pregnancy - baby not yet delivered                    |
| E241.16 | Sedative dependence                                      | L183z00 | Drug dependence during pregnancy/childbirth/puerperium NOS                   |
| E241.17 | Valium dependence                                        | L255300 | Maternal care for (suspected) damage to fetus from alcohol                   |
| E241000 | Hypnotic or anxiolytic dependence, unspecified           | SM0..00 | Alcohol causing toxic effect                                                 |

|         |                                                        |         |                                                     |
|---------|--------------------------------------------------------|---------|-----------------------------------------------------|
| E241100 | Hypnotic or anxiolytic dependence, continuous          | SM00.00 | Ethyl alcohol causing toxic effect                  |
| E241200 | Hypnotic or anxiolytic dependence, episodic            | SM00000 | Ethanol causing toxic effect                        |
| E241300 | Hypnotic or anxiolytic dependence in remission         | SM00100 | Denatured alcohol causing toxic effect              |
| E241z00 | Hypnotic or anxiolytic dependence NOS                  | SM00z00 | Ethyl alcohol causing toxic effect NOS              |
| E242.00 | Cocaine type drug dependence                           | SM01.00 | Methyl alcohol causing toxic effect                 |
| E242000 | Cocaine dependence, unspecified                        | SM01000 | Methanol causing toxic effect                       |
| E242100 | Cocaine dependence, continuous                         | SM01100 | Wood alcohol causing toxic effect                   |
| E242200 | Cocaine dependence, episodic                           | SM02.00 | Isopropyl alcohol causing toxic effect              |
| E242300 | Cocaine dependence in remission                        | SM03000 | Amyl alcohol causing toxic effect                   |
| E242z00 | Cocaine drug dependence NOS                            | SM03100 | Butyl alcohol causing toxic effect                  |
| E243.00 | Cannabis type drug dependence                          | SM0y.00 | Other alcohol causing toxic effect                  |
| E243.11 | Hashish dependence                                     | SM0z.00 | Alcohol causing toxic effect NOS                    |
| E243.12 | Hemp dependence                                        | SyuG000 | [X]Toxic effect of other alcohols                   |
| E243.13 | Marihuana dependence                                   | Z1Q6200 | Methadone maintenance                               |
| E243000 | Cannabis dependence, unspecified                       | Z1Q6214 | Heroin maintenance                                  |
| E243100 | Cannabis dependence, continuous                        | ZV11300 | [V]Personal history of alcoholism                   |
| E243200 | Cannabis dependence, episodic                          | ZV11311 | [V]Problems related to lifestyle alcohol use        |
| E243300 | Cannabis dependence in remission                       | ZV11400 | [V]Personal history of psychoactive substance abuse |
| E243z00 | Cannabis drug dependence NOS                           | ZV11500 | [V]Personal history of drug abuse by injection      |
| E244.00 | Amphetamine or other psychostimulant dependence        | ZV4K100 | [V]Drug use                                         |
| E244.11 | Psychostimulant dependence                             | ZV4KC00 | [V] Alcohol use                                     |
| E244.12 | Stimulant dependence                                   | E245.11 | LSD dependence                                      |
| E244000 | Amphetamine or psychostimulant dependence, unspecified | E245.12 | Lysergic acid diethylamide dependence               |
| E244100 | Amphetamine or psychostimulant dependence, continuous  | E245000 | Hallucinogen dependence, unspecified                |
| E244200 | Amphetamine or psychostimulant dependence, episodic    | E245100 | Hallucinogen dependence, continuous                 |
| E244300 | Amphetamine or psychostimulant dependence in remission | E245200 | Hallucinogen dependence, episodic                   |
| E244z00 | Amphetamine or psychostimulant dependence NOS          | E245300 | Hallucinogen dependence in remission                |
| E244z11 | Amphetamine or psychostimulant dependence NOS          | E245.00 | Hallucinogen dependence                             |

## ATTEMPTED SUICIDE

---

### At least one ICD-9 in:

- E950 Self-inflicted poisoning
  - E950.0 Self-inflicted poisoning by analgesics antipyretics and antirheumatics
  - E950.1 Self-inflicted poisoning by barbiturates
  - E950.2 Self-inflicted poisoning by other sedatives and hypnotics
  - E950.3 Self-inflicted poisoning by tranquilizers and other psychotropic agents
  - E950.4 Self-inflicted poisoning by other specified drugs and medicinal substances
  - E950.5 Self-inflicted poisoning by unspecified drug or medicinal substance
  - E950.6 Self-inflicted poisoning by agricultural and horticultural chemical and pharmaceutical preparations other than plant foods and fertilizers
  - E950.7 Self-inflicted poisoning by corrosive and caustic substances
  - E950.8 Self-inflicted poisoning by arsenic and its compounds
  - E950.9 Self-inflicted poisoning by other and unspecified solid and liquid substances
- E951 Self-inflicted poisoning
  - E951.0 Self-inflicted poisoning by gas distributed by pipeline
  - E951.1 Self-inflicted poisoning by liquefied petroleum gas distributed in mobile containers
  - E951.8 Self-inflicted poisoning by other utility gas
- E952 Self-inflicted poisoning
  - E952.0 Self-inflicted poisoning by motor vehicle exhaust gas
  - E952.1 Self-inflicted poisoning by other carbon monoxide
  - E952.8 Self-inflicted poisoning by other specified gases and vapors
  - E952.9 Self-inflicted poisoning by un specified gases and vapors
- E953 Self-inflicted injury by hanging, strangulation and suffocation
  - E953.0 Self-inflicted injury by hanging
  - E953.1 Self-inflicted injury by suffocation by plastic bag
  - E953.8 Self-inflicted injury by other specified means
  - E953.9 Self-inflicted injury by other unspecified means
- E954 Self-inflicted injury by drowning
- E955 Self-inflicted injury by firearms and explosives
  - E955.0 Self-inflicted injury by handgun
  - E955.1 Self-inflicted injury by shotgun
  - E955.2 Self-inflicted injury by hunting rifle
  - E955.3 Self-inflicted injury by military firearms
  - E955.4 Self-inflicted injury by other and unspecified firearm
  - E955.5 Self-inflicted injury by explosives
  - E955.6 Self-inflicted injury by air gun
  - E955.7 Self-inflicted injury by paintball gun
  - E955.9 Self-inflicted injury by firearms and explosives unspecified
- E956 Self-inflicted injury by cutting and piercing instrument
- E957 Self-inflicted injury by jumping from high places
  - E957.0 Self-inflicted injury by jumping from residential premises
  - E957.1 Self-inflicted injuries by jumping from other man-made structures
  - E957.2 Self-inflicted injuries by jumping from natural sites
  - E957.9 Self-inflicted injuries by jumping from unspecified site
- E958 Self-inflicted injury
  - E958.0 Self-inflicted injury by jumping or lying before a moving object
  - E958.1-E958.2 Self-inflicted injury by smoke, fire, flames, steam, hot vapours and



hot objects

E958.3, E958.4, E958.6-E958.9 Self-inflicted injury by other and unspecified means

E958.5 Self-inflicted injury by crashing of motor vehicle

E959 Late effects of self-inflicted injury

OR

**At least one ICD-10 in:**

X60-84 Intentional self-harm

X60 Intentional self-poisoning by and exposure to nonopioid analgesics, antipyretics and antirheumatics

X61 Intentional self-poisoning by and exposure to antiepileptic, sedative-hypnotic, antiparkinsonism and psychotropic drugs, not elsewhere classified

X62 Intentional self-poisoning by and exposure to narcotics and psychodysleptics [hallucinogens], not elsewhere classified

X63 Intentional self-poisoning by and exposure to other drugs acting on the autonomic nervous system

X64 Intentional self-poisoning by and exposure to other and unspecified drugs, medicaments and biological substances

X65 Intentional self-poisoning by and exposure to alcohol

X66 Intentional self-poisoning by and exposure to organic solvents and halogenated hydrocarbons and their vapours

X67 Intentional self-poisoning by and exposure to other gases and vapours

X68 Intentional self-poisoning by and exposure to pesticides

X69 Intentional self-poisoning by and exposure to other and unspecified chemicals and noxious substances

X70 Intentional self-harm by hanging, strangulation and suffocation

X71 Intentional self-harm by drowning and submersion

X72 Intentional self-harm by handgun discharge

X73 Intentional self-harm by rifle, shotgun and larger firearm discharge

X74 Intentional self-harm by other and unspecified firearm discharge

X75 Intentional self-harm by explosive material

X76 Intentional self-harm by smoke, fire and flames

X77 Intentional self-harm by steam, hot vapours and hot objects

X78 Intentional self-harm by sharp object

X79 Intentional self-harm by blunt object

X80 Intentional self-harm by jumping from a high place

X81 Intentional self-harm by jumping or lying before moving object

X82 Intentional self-harm by crashing of motor vehicle

X83 Intentional self-harm by other specified means

X84 Intentional self-harm by unspecified means

Y87.0 Late effects of intentional self-harm

OR

**At least one READ code in:**

|         |                                                              |         |                                                              |
|---------|--------------------------------------------------------------|---------|--------------------------------------------------------------|
| SL...15 | Overdose of drug                                             | U1A4.11 | [X]Accidental poisoning with antidepressant                  |
| T8...00 | Accidental poisoning by drugs, medicines and biologicals     | T952.00 | Accidental poisoning from other fish                         |
| T91z.00 | Accidental poisoning by household agents NOS                 | ZX1C.00 | Nipping self                                                 |
| U20..11 | [X]Deliberate drug overdose / other poisoning                | ZX17.00 | Head-banging                                                 |
| T8...11 | Cause of overdose - accidental                               | T938000 | Accidental poisoning by cyanides                             |
| 1BD1.00 | Suicidal ideation                                            | U20A000 | [X]Intent self pois organ solvent,halogen hydrocarb, home    |
| T803000 | Accidental poisoning by aspirin                              | TK7z.00 | Suicide+selfinflicted injury-jump from high place NOS        |
| TK05.00 | Suicide + selfinflicted poisoning by drug or medicine NOS    | T964200 | Accidental poisoning by cadmium and its compounds            |
| T921300 | Accidental poisoning by kerosene                             | ZX1B200 | Jumping from bridge                                          |
| TK...15 | Attempted suicide                                            | T953z00 | Accidental poisoning from berries or seeds NOS               |
| T930.00 | Accidental poisoning by organochlorine insecticides          | T80y.00 | Accidental poisoning by oth analgesics,antipyretic,antirheum |
| U1A..12 | [X]Accidental drug overdose / other poisoning                | TKx0000 | Suicide + selfinflicted injury-jumping before moving object  |
| TK...17 | Para-suicide                                                 | U209z00 | [X]Intent self poison alcohol unspecif place                 |
| TK...12 | Injury - self-inflicted                                      | T930500 | Accidental poisoning by toxaphene                            |
| U2...13 | [X]Suicide                                                   | ZX11400 | Biting own arm                                               |
| 1BD3.00 | Suicidal plans                                               | T954.00 | Accidental poisoning from other plants                       |
| T924z00 | Accidental poisoning by other solvents NOS                   | T820.00 | Accidental poisoning by chloral hydrate                      |
| T81..00 | Accidental poisoning by barbiturates                         | U221.00 | [X]Intent self harm by drowning/submersn occ resid instit'n  |
| T804100 | Accidental poisoning by paracetamol                          | T935200 | Accidental poisoning by chlorates                            |
| U2E..00 | [X]Self mutilation                                           | T930100 | Accidental poisoning by chlordane                            |
| 1BD4.00 | Suicide risk                                                 | U1A0z00 | [X]Accid poison/expos to nonopioid analgesic unspecif place  |
| TK3y.00 | Suicide + selfinflicted inj oth mean hang/strangle/suffocate | U204.13 | [X]Overdose - SSRI                                           |
| TK...11 | Cause of overdose - deliberate                               | T951.00 | Accidental poisoning from shellfish                          |
| 146B.00 | H/O: deliberate self harm                                    | U2A1.00 | [X]Intent self harm by blunt object occ resident instit'n    |
| U2...15 | [X]Para-suicide                                              | T903300 | Accidental poisoning by secondary propyl alcohol             |
| 1B19.11 | Suicidal - symptom                                           | TK3z.00 | Suicide + selfinflicted inj by hang/strangle/suffocate NOS   |
| TK60111 | Slashed wrists self inflicted                                | T854.00 | Accidental poisoning by anticholinergics                     |
| ZX1..13 | Deliberate self-harm                                         | TK72.00 | Suicide+selfinflicted injury-jump from natural sites         |
| U209.00 | [X]Intent self poison/exposure to alcohol                    | U2zz.00 | [X]Intent self harm by unspecif means occ at unspecif place  |
| ZX...00 | Self-harm                                                    | U1A9z00 | [X]Accid poison/expos to alcohol unspecif place              |
| T99y000 | Accidental poisoning by chlorine                             | U409z00 | [X]Pois/expos ?intent to alcohol unspecif place              |
| TK...13 | Poisoning - self-inflicted                                   | T83yz00 | Accidental poisoning by other tranquillisers NOS             |
| U2...11 | [X]Self inflicted injury                                     | T842100 | Accidental poisoning by caffeine                             |
| 146A.00 | H/O: attempted suicide                                       | T806300 | Accidental poisoning by ibuprofen                            |
| TK60100 | Self inflicted lacerations to wrist                          | U408z00 | [X]Pois/expos ?intent to oth/unsp drug/medic unspecif place  |

|         |                                                              |         |                                                              |
|---------|--------------------------------------------------------------|---------|--------------------------------------------------------------|
| ZX17100 | Banging own head against object                              | U20y200 | [X]Int self poison unspecif chemical school/pub admin area   |
| SL...14 | Overdose of biological substance                             | U1A2.00 | [X]Accident poisoning/exposure to sedative hypnotic          |
| 1BDC.00 | Intent of deliberate self harm with detailed plans           | TK70.00 | Suicide+selfinflicted injury-jump from residential premises  |
| ZX16211 | Poking own eyes                                              | TK2..00 | Suicide + selfinflicted poisoning by other gases and vapours |
| ZX13.00 | Cutting self                                                 | T840200 | Accidental poisoning by monoamine oxidase inhibitors         |
| 1BDA.00 | Thoughts of deliberate self harm                             | T93z.00 | Accidental poisoning agricultural chemical preparations NOS  |
| ZX14200 | Pulling out sutures                                          | T832z00 | Accidental poisoning- benzodiazepine-based tranquilliser NOS |
| TK30.00 | Suicide and selfinflicted injury by hanging                  | T932.00 | Accidental poisoning by carbamates                           |
| 14K0.00 | H/O: repeated overdose                                       | TN04.00 | Injury ?accidental, poisoning by other spec drug/medicament  |
| T967.00 | Accidental poisoning by cosmetics                            | ZX1K.00 | Self-incineration                                            |
| TK00.00 | Suicide + selfinflicted poisoning by analgesic/antipyretic   | U40y400 | [X]Pois/expos ?intent unspecif chemical in street/highway    |
| TK60.00 | Suicide and selfinflicted injury by cutting                  | U40B400 | [X]Pois/expos ?intent other gas/vapour in street/highway     |
| 1B19.00 | Suicidal                                                     | T993000 | Accidental poisoning by bromobenzyl cyanide                  |
| T901.00 | Accidental poisoning by other ethyl alcohol and its products | T832100 | Accidental poisoning by diazepam                             |
| T9...00 | Accidental poisoning by other non-drug substances            | U405.00 | [X]Poisoning/exposure, ? intent, to narcotic drug            |
| TK01.00 | Suicide + selfinflicted poisoning by barbiturates            | U208000 | [X]Int self poison/exposure to oth/unsp drug/medicam home    |
| 14K..00 | H/O: poisoning                                               | T840.00 | Accidental poisoning by antidepressants                      |
| U30..11 | [X]Deliberate drug poisoning                                 | U1Ayy00 | [X]Accid pois/expos to unspecif chemical other spec place    |
| U2...00 | [X]Intentional self-harm                                     | T971.00 | Accidental poisoning by coal gas NOS                         |
| U2...14 | [X]Attempted suicide                                         | T99yz00 | Accidental poisoning by other gases and vapours NOS          |
| T955.00 | Accidental poisoning from mushrooms and other fungi          | U2A..00 | [X]Intentional self harm by blunt object                     |
| T80..00 | Accidental poisoning by analgesics,antipyretic,antirheumatic | T840000 | Accidental poisoning by amitriptyline                        |
| T88..00 | Accidental poisoning by other drugs                          | T805.00 | Accidental poisoning by pyrazole derivatives                 |
| T8z..00 | Accidental poisoning by drugs NOS                            | U2C4.00 | [X]Int self harm jump/lying befr mov obje occ street/highway |
| T840z00 | Accidental poisoning by antidepressants NOS                  | U274.00 | [X]Intent self harm by smoke fire/flame occ street/highway   |
| U1AB.11 | [X]Accidental carbon monoxide poisoning                      | U400.00 | [X]Poisoning/exposure, ? intent, to nonopioid analgesic      |
| T90..00 | Accidental poisoning by alcohol, NEC                         | U1ADz00 | [X]Acc poison by and exposure to amphetamine - unspec places |
| U200.11 | [X]Overdose - paracetamol                                    | T825.00 | Accidental poisoning by mixed sedatives NEC                  |
| 1BD8.00 | At risk of DSH - deliberate self harm                        | U1A9000 | [X]Accident poison/exposure to alcohol at home               |
| ZX13100 | Cutting own wrists                                           | T832500 | Accidental poisoning by nitrazepam                           |
| ZX1P.00 | Swallowing substances                                        | U1A2.13 | [X]Accidental poisoning with temazepam                       |
| ZX1I.00 | Self-scalding                                                | T83y.00 | Accidental poisoning by other tranquillisers                 |
| T91..00 | Accidental poisoning by household agents                     | U4A5.00 | [X]Contct wth blunt obj undet intent occ trade/service area  |

|         |                                                              |         |                                                              |
|---------|--------------------------------------------------------------|---------|--------------------------------------------------------------|
| T921200 | Accidental poisoning by petrol                               | TN0..00 | Injury ?accidental, poisoning by solid/liquid substances     |
| U2...12 | [X]Injury - self-inflicted                                   | T912.00 | Accidental poisoning by polishes                             |
| U200z00 | [X]Intent self poison nonopioid analgesic unspecif place     | T916z00 | Accidental poisoning by paint or varnish NOS                 |
| U1A..11 | [X]Accidental drug / other poisoning                         | U1A9400 | [X]Accid poison/expos alcohol in street/highway              |
| TK...14 | Suicide and self harm                                        | TN07.00 | Injury ?accidental, poisoning by agricultural chemicals      |
| TK...00 | Suicide and selfinflicted injury                             | T980100 | Accidental poisoning by butane                               |
| U200.00 | [X]Intent self poison/exposure to nonopioid analgesic        | ZX1L600 | Self-mutilation of ears                                      |
| T910.00 | Accidental poisoning by synthetic detergents and shampoos    | ZX1L500 | Enucleation of own eyes                                      |
| ZV1B200 | [V]Personal history of self-harm                             | ZX1K.11 | Setting fire to self                                         |
| TK04.00 | Suicide + selfinflicted poisoning by other drugs/medicines   | T964000 | Accidental poisoning by beryllium and its compounds          |
| ZX11.00 | Biting self                                                  | ZX1E.00 | Pinching self                                                |
| U1Ay.00 | [X]Accident poisoning/exposure to unspecif chemical          | U20Bz00 | [X]Intent self poison other gas/vapour unspecif place        |
| TK3..00 | Suicide + selfinflicted injury by hang/strangulate/suffocate | T920z00 | Accidental poisoning by petrol solvents NOS                  |
| T935.00 | Accidental poisoning by herbicides                           | U211.00 | [X]Intent self harm by hangng strangult/suffoct resid instit |
| T913z00 | Accidental poisoning by other cleaning agents NOS            | T965100 | Accidental poisoning by fertilisers                          |
| T884.00 | Accidental poisoning by gastrointestinal system drugs        | U1A3.00 | [X]Accident poisoning/exposure to antiparkinson drug         |
| T96y.00 | Accidental poisoning by other solid and liquid substances OS | T983z00 | Accidental poisoning by carbon monoxide - domestic fuel NOS  |
| TK7..00 | Suicide and selfinflicted injury by jumping from high place  | TKx5.00 | Suicide and selfinflicted injury by crashing motor vehicle   |
| U40..00 | [X]Poisoning/expos to noxious substance,undetermined intent  | T822000 | Accidental poisoning by bromides                             |
| U20A.11 | [X]Self poisoning from glue solvent                          | T930300 | Accidental poisoning by dieldrin                             |
| T970.00 | Accidental poisoning by carbon monoxide from piped gas       | T938.00 | Accidental poisoning by fumigants                            |
| U27..00 | [X]Intentional self harm by smoke, fire and flames           | U1A6.00 | [X]Accident poisoning/exposure to hallucinogen               |
| U20B.11 | [X]Self carbon monoxide poisoning                            | U40A300 | [X]Pois/exp ?intent org solvent,halogen hydrocarb,sport area |
| T95..00 | Accidental poisoning from foodstuffs and poisonous plants    | ZX1L811 | Snapping own bones                                           |
| U1A..00 | [X]Accidental poisoning by + exposure to noxious substances  | TK54.00 | Suicide and selfinflicted injury by other firearm            |
| ZX11200 | Biting own fingers                                           | T961000 | Accidental poisoning by mercury, unspecified                 |
| ZX11500 | Biting own tongue                                            | TK6z.00 | Suicide and selfinflicted injury by cutting and stabbing NOS |
| TN...11 | Poisoning undetermined - accidentally or purposely inflicted | U4C..00 | [X]Falling lying running befor/into moving obj undet intent  |
| ZX19.00 | Hitting self                                                 | T843100 | Accidental poisoning by opiate antagonists                   |
| ZX1G.00 | Scratches self                                               | TN21.00 | Injury ?accidental, poisoning by other carbon monoxide       |
| 1BD7.00 | Low suicide risk                                             | T921z00 | Accidental poisoning by petrol fuel or cleaner NOS           |
| T911.00 | Accidental poisoning by soap products                        | U1AD000 | [X]Accident poisoning by and exposure to                     |

|         |                                                                 |         |                                                                            |
|---------|-----------------------------------------------------------------|---------|----------------------------------------------------------------------------|
| U29..00 | [X]Intentional self harm by sharp object                        | U1A5000 | amphetamine - home<br>[X]Accident poison/exposure to narcotic drug at home |
| TK61.00 | Suicide and selfinflicted injury by stabbing                    | U201.00 | [X]Intent self poison/exposure to antiepileptic                            |
| TK03.00 | Suicide + selfinflicted poisoning<br>tranquilliser/psychotropic | TKxy.00 | Suicide and selfinflicted injury by other<br>specified means               |
| T842000 | Accidental poisoning by amphetamine                             | TK01000 | Suicide and self inflicted injury by<br>Amylobarbitone                     |
| U20..00 | [X]Intentional self poisoning/exposure to noxious<br>substances | U201z00 | [X]Intent self poison antiepileptic unspecif<br>place                      |
| U40y.00 | [X]Poisoning/exposure, ? intent, to unspecif<br>chemical        | U204z00 | [X]Intent self poison psychotropic drug<br>unspecif place                  |
| T953000 | Accidental poisoning from berries                               | T936000 | Accidental poisoning by organic mercurials                                 |
| TK07.00 | Suicide + selfinflicted poisoning by<br>corrosive/caustic subst | U1A7z00 | [X]Accid poison/expos to oth autonomic drug<br>unspecif place              |
| T913.00 | Accidental poisoning by other cleaning agents                   | TK0z.00 | Suicide + selfinflicted poisoning by solid/liquid<br>subst NOS             |
| TK51.00 | Suicide and selfinflicted injury by shotgun                     | U207z00 | [X]Intent self poison oth autonomic drug<br>unspecif place                 |
| U45..00 | [X]Other+unspecified firearm discharge<br>undetermined intent   | T83z.00 | Accidental poisoning by tranquilisers NOS                                  |
| ZX1LD00 | [X]Self mutilation                                              | U402.00 | [X]Poisoning/exposure, ? intent, to sedative<br>hypnotic                   |
| ZX1..14 | Self-abusive behaviour                                          | T84z.00 | Accidental poisoning by psychotropic agents<br>NOS                         |
| ZX18.00 | Hanging self                                                    | T96..00 | Accidental poisoning by other solid and liquid<br>substances               |
| U205.11 | [X]Overdose - heroin                                            | U1AA000 | [X]Accid poison/expos organ solvent,halogen<br>hydrocarb, home             |
| T938200 | Accidental poisoning by phosphine                               | U40B.00 | [X]Poisoning/exposure, ? intent, to other<br>gas/vapour                    |
| U200.13 | [X]Overdose - aspirin                                           | U1AC.12 | [X]Accidental poisoning with paraquat                                      |
| U409.00 | [X]Poisoning/exposure, ? intent, to alcohol                     | U1Ay600 | [X]Acc pois/expos unspecif chemical<br>indust/construct area               |
| T955000 | Accidental poisoning from mushrooms                             | TK5..00 | Suicide and selfinflicted injury by firearms and<br>explosives             |
| U290.00 | [X]Intentional self harm by sharp object<br>occurrence at home  | TN20.00 | Injury ?accidental, poisoning by motor vehicle<br>exhaust gas              |
| TK0..00 | Suicide + selfinflicted poisoning by solid/liquid<br>substances | T921.00 | Accidental poisoning by petrol fuels and<br>cleaners                       |
| U21..00 | [X]Intent self harm by hanging strangulation /<br>suffocation   | U4A3.00 | [X]Contct wth blunt obj undet intent occ<br>sport/athletic area            |
| ZX1H100 | Self-strangulation                                              | T831000 | Accidental poisoning by haloperidol                                        |
| T916200 | Accidental poisoning by non-lead paints                         | U280.00 | [X]Intent self harm by steam hot vapour/hot<br>obj occ at home             |
| U1A9.00 | [X]Accident poisoning/exposure to alcohol                       | U2y0.00 | [X]Intentionl self harm by oth specif means<br>occurrn at home             |
| T935500 | Accidental poisoning by paraquat                                | T935z00 | Accidental poisoning by herbicides NOS                                     |
| TN1..00 | Injury ?accidental, poisoning by gases in domestic<br>use       | T80yz00 | Accidental poisoning-oth<br>analgesic,antipyretic,antirheum NOS            |
| TK4..00 | Suicide and selfinflicted injury by drowning                    | U241.00 | [X]Int self harm rifl s'gun/lrg frarm disch occ<br>resid instit            |
| ZX1L.00 | Self-mutilation                                                 | T955z00 | Accidental poisoning from mushrooms and<br>fungi NOS                       |
| ZX19300 | Head-hitting                                                    | U406y00 | [X]Pois/exp ?intent to hallucinogen other spec<br>place                    |

|         |                                                              |         |                                                              |
|---------|--------------------------------------------------------------|---------|--------------------------------------------------------------|
| ZX1..11 | Self-destructive behaviour                                   | T935400 | Accidental poisoning by mixtures herbicides+plant food etc   |
| T92..00 | Accidental poisoning by petrol products                      | U4D3.00 | [X]Crash of motor vehicle undeterm intent sport/athlet area  |
| TK02.00 | Suicide + selfinflicted poisoning by oth sedatives/hypnotics | T82y.00 | Accidental poisoning by other sedatives and hypnotics OS     |
| T914.00 | Accidental poisoning by disinfectants                        | U20C.12 | [X]Self poisoning with paraquat                              |
| T88yz00 | Accidental poisoning by other drugs NOS                      | T940.00 | Accidental poisoning by corrosive aromatics                  |
| T961.00 | Accidental poisoning by mercury and its compounds and fumes  | TN05.00 | Injury ?accidental, poisoning by drug or medicament NOS      |
| T9z..00 | Accidental poisoning NOS                                     | T802.00 | Accidental poisoning by other opiates                        |
| T85..00 | Accidental poisoning by other drugs acting on nervous system | T841.00 | Accidental poisoning by hallucinogens                        |
| T883.00 | Accidental poisoning by cardiovascular system drugs          | U1A2.12 | [X]Accidental poisoning with diazepam                        |
| U2z..00 | [X]Intentional self harm by unspecified means                | U2A0.00 | [X]Intentional self harm by blunt object occurrence at home  |
| U1AA.11 | [X]Accidental poisoning from glue solvent                    | U208z00 | [X]Intent self poison oth/unsp drug/medic unspecif place     |
| T886.00 | Accidental poisoning by muscle + respiratory system drugs    | T991.00 | Accidental poisoning by sulphur dioxide                      |
| U204.12 | [X]Overdose - amitriptyline                                  | U409000 | [X]Poison/exposure ?intent, to alcohol at home               |
| T923000 | Accidental poisoning by paraffin wax                         | T99..00 | Accidental poisoning by other gases and vapours              |
| T902000 | Accidental poisoning by methanol                             | T850.00 | Accidental poisoning by anticonvulsant + anti-parkinson drug |
| ZX10.00 | Swallowing objects                                           | T850.11 | Accidental poisoning by anticonvulsant                       |
| ZX1L100 | Self-mutilation of hands                                     | U205z00 | [X]Intent self poison narcotic drug unspecif place           |
| ZX1..00 | Self-injurious behaviour                                     | U202z00 | [X]Intent self poison sedative hypnotic unspecif place       |
| 1BD5.00 | High suicide risk                                            | U207.00 | [X]Intent self poison/exposure to oth autonomic drug         |
| ZX1LA00 | Removing own nails                                           | U20C.00 | [X]Intent self poison/exposure to pesticide                  |
| ZX11100 | Biting own hand                                              | T964700 | Accidental poisoning by thallium compounds                   |
| ZX11300 | Biting own toes                                              | U40y600 | [X]Poison/expos ?intent unspec chemic indust/construct area  |
| U4D0.00 | [X]Crashng of motor vehicle undetermined intent occ at home  | T95y.00 | Accidental poisoning by other foods                          |
| T800.11 | Accidental poisoning by diamorphine                          | T88y000 | Accidental poisoning by central appetite depressants         |
| U2D4.00 | [X]Intent self harm by crash motor vehicl occ street/highway | T961z00 | Accidental poisoning by mercury, NOS                         |
| U208.00 | [X]Int self poison/exposure to other/unspec drug/medicament  | U1A8y00 | [X]Accid pois/expos to oth/unsp drug/medic other spec place  |
| T887000 | Accidental poisoning by skin drugs                           | ZX1K.12 | Setting self alight                                          |
| TKx2.00 | Suicide and selfinflicted injury by scald                    | U720.00 | [X]Sequelae of intentional self-harm                         |
| U4B..00 | [X]Falling jumping/pushed from high place undeterm intent    | U2yz.00 | [X]Intent self harm by oth specif means occ unspecif place   |
| TK6..00 | Suicide and selfinflicted injury by cutting and stabbing     | U202y00 | [X]Int self poison sedative hypnotic other spec place        |
| T86..00 | Accidental poisoning by antibiotics                          | U404300 | [X]Pois/exp ?intent psychotropic drug in sport/athletic area |
| T98..00 | Accidental poisoning by other utility gas + carbon monoxide  | T802z00 | Accidental poisoning by other opiates NOS                    |

|         |                                                             |         |                                                              |
|---------|-------------------------------------------------------------|---------|--------------------------------------------------------------|
| U204.00 | [X]Intent self poison/exposure to psychotropic drug         | U409200 | [X]Pois/exp ?intent alcohol school/pub admin area            |
| ZX13.11 | Cuts self                                                   | U1Ayz00 | [X]Accid poison/expos to unspecif chemical unspecif place    |
| T966000 | Accidental poisoning by glues                               | T950.00 | Accidental poisoning from meat                               |
| ZX14100 | Reopening scars                                             | U1A1.00 | [X]Accident poisoning/exposure to antiepileptic              |
| T901100 | Accidental poisoning by methylated spirit                   | T913000 | Accidental poisoning by scouring agents                      |
| T935300 | Accidental poisoning by diquat                              | TK10.00 | Suicide + selfinflicted poisoning by gas via pipeline        |
| T902.00 | Accidental poisoning by methyl alcohol                      | TN08.00 | Injury ?accidental, poisoning by arsenic or its compounds    |
| 1BD6.00 | Moderate suicide risk                                       | T966y00 | Accidental poisoning by other adhesives                      |
| T83..00 | Accidental poisoning by tranquilisers                       | U205y00 | [X]Int self poison narcotic drug other spec place            |
| U1AB.00 | [X]Accident poisoning/exposure to other gas/vapour          | TK1..00 | Suicide + selfinflicted poisoning by gases in domestic use   |
| T942z00 | Accidental poisoning by caustic alkalis NOS                 | U20A400 | [X]Int self poison org solvent,halogen hydrocarb,in highway  |
| T841000 | Accidental poisoning by cannabis derivatives                | T803z00 | Accidental poisoning by salicylates NOS                      |
| ZX12.00 | Burning self                                                | U1A2000 | [X]Accident poison/exposure to sedative hypnotic at home     |
| U27z.00 | [X]Intent self harm by smoke fire/flames occ unspecif place | T931300 | Accidental poisoning by malathion                            |
| T901300 | Accidental poisoning by ethanol, NOS                        | TKx0.00 | Suicide + selfinflicted injury-jump/lie before moving object |
| T88z.00 | Accidental poisoning by unspecified drugs                   | TN1z.00 | Injury ?accidental, poisoning by gas in domestic use NOS     |
| ZX11600 | Biting sides of own cheeks                                  | T85z.00 | Accidental poisoning by drugs acting on nervous system NOS   |
| T88y.00 | Accidental poisoning by other drugs OS                      | TKx4.00 | Suicide and selfinflicted injury by electrocution            |
| T937300 | Accidental poisoning by warfarin                            | T807.00 | Accidental poisoning by other non-narcotic analgesics        |
| U20B200 | [X]Int self poison other gas/vapour school/pub admin area   | TK11.00 | Suicide + selfinflicted poisoning by liquified petrol gas    |
| U2y..00 | [X]Intentional self harm by other specified means           | TN0z.00 | Injury ?accidental, poisoning by solid or liquid subst NOS   |
| T973.00 | Accidental poisoning by piped natural gas                   | ZX...11 | Self-damage                                                  |
| T93..00 | Accidental poisoning by agricultural chemical preparations  | TKxz.00 | Suicide and selfinflicted injury by other means NOS          |
| ZX13200 | Cutting own throat                                          | T806.00 | Accidental poisoning by antirheumatics                       |
| T806100 | Accidental poisoning by indomethacin                        | T964600 | Accidental poisoning by nickel compounds                     |
| ZX1A.00 | Inserting foreign bodies into own orifices                  | T813.00 | Accidental poisoning by pentobarbitone                       |
| T924.00 | Accidental poisoning by other solvents                      | T806z00 | Accidental poisoning by antirheumatics NOS                   |
| T97..00 | Accidental poisoning by gas distributed by pipeline         | ZX19100 | Punching self                                                |
| ZX14300 | Poking fingers into wound                                   | U2B0.00 | [X]Intent self harm by jumping from high place occ at home   |
| ZX11111 | Hand biting                                                 | U270.00 | [X]Intention self harm by smoke fire/flames occurrn at home  |
| T802200 | Accidental poisoning by morphine                            | U206400 | [X]Intent self pois hallucinogen in street/highway           |
| T881.00 | Accidental poisoning by primarily systemic agents           | C110100 | Self-induced hyperinsulinism                                 |
| U41..00 | [X]Hanging strangulation + suffocation undetermined intent  | T916000 | Accidental poisoning by lacquers                             |
| T900.00 | Accidental poisoning by alcoholic beverages                 | T850z00 | Accidental poisoning by anticonvulsant/anti-                 |

|         |                                                              |         |                                                              |
|---------|--------------------------------------------------------------|---------|--------------------------------------------------------------|
| ZV15600 | [V]Personal history of poisoning                             | T854000 | parkin drug NOS                                              |
| T98z.00 | Accidental poisoning by carbon monoxide NOS                  | T830200 | Accidental poisoning by atropine                             |
| TKz..00 | Suicide and selfinflicted injury NOS                         | T931z00 | Accidental poisoning by prochlorperazine                     |
| ZX1B.00 | Jumping from height                                          | T964.00 | Accidental poisoning by organophosphorus insecticides NOS    |
| U22..00 | [X]Intentional self harm by drowning and submersion          | U29y.00 | Accidental poisoning by other metals + compounds and fumes   |
| U209000 | [X]Int self poison/exposure to alcohol at home               | T81z.00 | [X]Intention self harm by sharp object occ oth specif place  |
| U1AB600 | [X]Acc pois/expos other gas/vapour indust/construct area     | U28z.00 | Accidental poisoning by barbiturates NOS                     |
| U1ABz00 | [X]Accid poison/expos to other gas/vapour unspecif place     | TK2z.00 | [X]Intent self harm by steam hot vapour/obj occ unspec place |
| T916.00 | Accidental poisoning by other paints and varnishes           | U26..00 | Suicide + selfinflicted poisoning by gases and vapours NOS   |
| U20yz00 | [X]Intent self poison unspecif chemical unspecif place       | U1A8100 | [X]Intentional self harm by explosive material               |
| U2C..00 | [X]Intent self harm by jumping / lying before moving object  | T95z.00 | [X]Accid poison/expos to oth/unsp drug/medicam res institut  |
| U2z0.00 | [X]Intentional self harm by unspecif means occurrn at home   | U207000 | Accidental poisoning by foodstuffs and poisonous plants NOS  |
| T981z00 | Accidental poisoning by utility gas NOS                      | T936.00 | [X]Int self poison/exposure to oth autonomic drug at home    |
| U20A.00 | [X]Intentional self poison organ solvent,halogen hydrocarb   | U1A8z00 | Accidental poisoning by fungicides                           |
| TKy..00 | Late effects of selfinflicted injury                         | U2Cy.00 | [X]Accid poison/expos to oth/unsp drug/medic unspecif place  |
| U21z.00 | [X]Intent self harm by hangng strangul/suffoct unspecif plce | T963100 | [X]Int self harm jump/lying bef mov obje occ oth specif plce |
| U1AD.00 | [X]Accidental poisoning by and exposure to amfetamine        | T903100 | Accidental poisoning by arsenic compounds                    |
| T931.00 | Accidental poisoning by organophosphorus insecticides        | T855100 | Accidental poisoning by isopropanol                          |
| U1A0000 | [X]Accident poison/exposure to nonopioid analgesic at home   | T832200 | Accidental poisoning by noradrenalin                         |
| T98yz00 | Accidental poisoning by carbon monoxide from oth source NOS  | T932100 | Accidental poisoning by propoxur                             |
| T92z.00 | Accidental poisoning by solvent NOS                          | T963.00 | Accidental poisoning by carbaryl                             |
| TK71.00 | Suicide+selfinflicted injury-jump from oth manmade structure | T853.00 | Accidental poisoning by arsenic and its compounds and fumes  |
| T84..00 | Accidental poisoning by other psychotropic agents            | T853.00 | Accidental poisoning by cholinergics                         |
| U40C.00 | [X]Poisoning/exposure, ? intent, to pesticide                | U2y1.00 | [X]Intent self harm by oth specif means occ resid instit'n   |
| T915.00 | Accidental poisoning by lead paints                          | T98y200 | Accidental poisoning by CO - fuels in industrial use         |
| U1AC.11 | [X]Accidental poisoning with weedkiller                      | ZX1Q.11 | Jumping under train                                          |
| U4A..00 | [X]Contact with blunt object, undetermined intent            | U20C.11 | [X]Self poisoning with weedkiller                            |
| T937z00 | Accidental poisoning by rodenticides NOS                     | T961200 | Accidental poisoning by mercury fumes                        |
| U204000 | [X]Int self poison/exposure to psychotropic drug at home     | ZX1H200 | Self-suffocation                                             |
| U202000 | [X]Int self poison/exposure to sedative hypnotic at home     | T916300 | Accidental poisoning by white washes                         |
| T96z.00 | Accidental poisoning by solid and liquid substances NOS      | ZX1L900 | Pulling own teeth out                                        |
|         |                                                              | U294.00 | [X]Intention self harm by sharp object occ street/highway    |



|         |                                                                 |         |                                                                  |
|---------|-----------------------------------------------------------------|---------|------------------------------------------------------------------|
| T934.00 | Accidental poisoning by other insecticides                      | ZX1L300 | Self-mutilation of penis                                         |
| T953100 | Accidental poisoning from seeds                                 | U21y.00 | [X]Intent self harm by hangng strangul/suffocat<br>oth spec plce |
| U47..00 | [X]Exposure to smoke, fire and flames,<br>undetermined intent   | T815.00 | Accidental poisoning by quinalbarbitone                          |
| T832.00 | Accidental poisoning by benzodiazepine-based<br>tranquillisers  | U4D7.00 | [X]Crashng of motor vehicle undetermined<br>intent occ on farm   |
| T82..00 | Accidental poisoning by other sedatives and<br>hypnotics        | ZX1R.00 | Throwing self in front of vehicle                                |
| U200.12 | [X]Overdose - ibuprofen                                         | U1Ay200 | [X]Acc poison/expos unspecif chemical<br>school/pub admin area   |
| T920.00 | Accidental poisoning by petroleum solvents                      | U1A3500 | [X]Accid poison/expos antiparkinson drug<br>trade/service area   |
| ZX1B100 | Jumping from building                                           | U1A9500 | [X]Accid poison/expos alcohol trade/service<br>area              |
| U2D0.00 | [X]Intent self harm by crash of motor vehicl<br>occurrn at home | T832400 | Accidental poisoning by medazepam                                |
| ZX1F.00 | Rubbing own skin                                                | TN2..00 | Injury ?accidental, poisoning by other gases                     |
| T887300 | Accidental poisoning by otorhinolaryngological<br>drugs         | U410.00 | [X]Hanging strangulat+suffocat undet intent<br>occurrn at home   |
| T880.00 | Accidental poisoning by hormones and synthetic<br>substitutes   | T920200 | Accidental poisoning by petroleum naphtha                        |
| U1Ay000 | [X]Accident poison/exposure to unspecif<br>chemical at home     | T887z00 | Accidental poisoning by skin, eye, ENT and<br>dental drug NOS    |
| T885.00 | Accidental poisoning by water,mineral,uric acid<br>metab drugs  | U2C1.00 | [X]Int self harm jump/lying befr mov obje occ<br>resid instit'n  |
| U25..00 | [X]Intent self harm by other/unspecified firearm<br>discharge   | T921.12 | Accidental poisoning by petroleum fuels                          |
| U205.00 | [X]Intent self poison/exposure to narcotic drug                 | T940011 | Accidental poisoning by phenol                                   |
| U202.12 | [X]Overdose - diazepam                                          | U1AC000 | [X]Accident poison/exposure to pesticide at<br>home              |
| U72..00 | [X]Sequel intentn self-harm assault+event of<br>undeterm intent | TN11.00 | Injury ?accidental, poisoning by liquid petrol<br>gas            |
| ZX1LB00 | Eating own flesh                                                | U2Bz.00 | [X]Int self harm by jump from high place occ<br>unspecif place   |
| ZX17200 | Banging own head against own body parts                         | TK1z.00 | Suicide + selfinflicted poisoning by domestic<br>gases NOS       |
| T983100 | Accidental poisoning by CO- coke in domestic<br>stove/fireplace | T98y000 | Accidental poisoning by CO - blast furnace gas                   |
| U49..00 | [X]Contact with sharp object, undetermined<br>intent            | TK01400 | Suicide and self inflicted injury by<br>Phenobarbitone           |
| ZX15.00 | Drowning self                                                   | T85y.00 | Accid. poisoning by other drugs acting on<br>nervous system OS   |
| U204.11 | [X]Overdose - antidepressant                                    | U22y.00 | [X]Intent self harm by drown/submersn occ<br>oth specif place    |
| T814.00 | Accidental poisoning by phenobarbitone                          | U20Cy00 | [X]Int self poison pesticide other spec place                    |
| U1A2.11 | [X]Accidental poisoning with sleeping tablets                   | U206.00 | [X]Intent self poison/exposure to hallucinogen                   |
| TKx1.00 | Suicide and selfinflicted injury by burns or fire               | U202.18 | [X]Overdose - amobarbital                                        |
| U2B..00 | [X]Intentional self harm by jumping from a high<br>place        | T830000 | Accidental poisoning by chlorpromazine                           |
| T470.00 | Accidental poisoning by gases or fumes on ship                  | ZX16.00 | Gouging own body parts                                           |
| ZX1LC00 | Stripping own skin                                              | T807z00 | Accidental poisoning by non-narcotic<br>analgesics NOS           |
| ZRLfC12 | HoNOS item 2 - non-accidental self injury                       | T887400 | Accidental poisoning by dental drugs                             |
| ZX1L911 | Extracting own teeth                                            | U1Ay500 | [X]Accid poison/expos unspecif chemical<br>trade/service area    |

|         |                                                                 |         |                                                                |
|---------|-----------------------------------------------------------------|---------|----------------------------------------------------------------|
| 1BDB.00 | Plans for deliberate self harm without intent                   | T966.00 | Accidental poisoning by glues and adhesives                    |
| ZX11.11 | Bites self                                                      | ZX1B300 | Jumping from cliff                                             |
| U1A2.15 | [X]Accidental poisoning with nitrazepam                         | U2B6.00 | [X]Int self harm by jump from high place<br>indust/constr area |
| TKx..00 | Suicide and selfinflicted injury by other means                 | U250.00 | [X]Intent self harm oth/unspecif firearm disch<br>occ at home  |
| TH02.00 | Late effects of accidental poisoning                            | ZX1L700 | Self-inducing a prolapse                                       |
| ZX1..12 | SIB - Self-injurious behaviour                                  | T852100 | Accidental poisoning by lignocaine                             |
| T937200 | Accidental poisoning by thallium                                | U1A5z00 | [X]Accid poison/expos to narcotic drug<br>unspecif place       |
| T981400 | Accidental poisoning by cooking gas NOS                         | U409400 | [X]Pois/expos ?intent alcohol in<br>street/highway             |
| T921100 | Accidental poisoning by gas oils                                | U2zy.00 | [X]Intent self harm by unspecif means occ oth<br>specif place  |
| T965000 | Accidental poisoning by plant food                              | ZX1L800 | Breaking own bones                                             |
| U202.16 | [X]Overdose - benzodiazepine                                    | TKx7.00 | Suicide and selfinflicted injury caustic subst,<br>excl poison |
| ZX1N.00 | Stabbing self                                                   | U200y00 | [X]Int self poison nonopioid analgesic other<br>spec place     |
| T803.00 | Accidental poisoning by salicylates                             | U204y00 | [X]Int self poison psychotropic drug other spec<br>place       |
| TK20.00 | Suicide + selfinflicted poisoning by motor veh<br>exhaust gas   | T852.00 | Accidental poisoning by local anaesthetic                      |
| T99y.00 | Accidental poisoning by other gases and vapours<br>OS           | U408000 | [X]Poison/exposure ?intent, to oth/unsp<br>drug/medicam home   |
| U200000 | [X]Int self poison/exposure to nonopioid<br>analgesic at home   | U202400 | [X]Intent self pois sedative hypnotic in<br>street/highway     |
| U1A5.00 | [X]Accident poisoning/exposure to narcotic drug                 | U1ABy00 | [X]Accid pois/expos to other gas/vapour other<br>spec place    |
| TK1y.00 | Suicide and selfinflicted poisoning by other utility<br>gas     | U200500 | [X]Intent self pois nonopioid analgesic<br>trade/service area  |
| T953.00 | Accidental poisoning from berries and seeds                     | U208400 | [X]Intent self pois oth/unsp drug/medic in<br>street/highway   |
| U202.17 | [X]Overdose - barbiturate                                       | U200100 | [X]Intent self poison nonopioid analgesic at res<br>institut   |
| U1A0.11 | [X]Accidental poisoning with paracetamol                        | U20C000 | [X]Int self poison/exposure to pesticide at<br>home            |
| T955y00 | Accidental poisoning from other fungi                           | U402z00 | [X]Pois/expos ?intent to sedative hypnotic<br>unspecif place   |
| T852000 | Accidental poisoning by cocaine                                 | U208y00 | [X]Int self poison oth/unsp drug/medic other<br>spec place     |
| T942000 | Accidental poisoning by sodium hydroxide                        | U209y00 | [X]Int self poison alcohol other spec place                    |
| U1A0.00 | [X]Accident poisoning/exposure to nonopioid<br>analgesic        | U2z2.00 | [X]Intent self harm by unspec mean occ<br>sch/ins/pub adm area |
| T941000 | Accidental poisoning by hydrochloric acid                       | ZX16100 | Gouging own flesh                                              |
| ZX1J.00 | Self-electrocution                                              | T841z00 | Accidental poisoning by hallucinogen NOS                       |
| T854200 | Accidental poisoning by hyoscine                                | T982z00 | Accidental poisoning by exhaust gas from<br>motor vehicle NOS  |
| TN00.00 | Injury ?accidental, poisoning by analgesic or anti-<br>pyretic  | T964500 | Accidental poisoning by manganese and its<br>compounds         |
| T80z.00 | Accidental poisoning by<br>analgesics,antipyretic,antirheum NOS | U404.00 | [X]Poisoning/exposure, ? intent, to<br>psychotropic drug       |
| ZX19200 | Slapping self                                                   | U22z.00 | [X]Intent self harm by drown/submersn occ<br>unspecified place |
| U1A7.00 | [X]Accident poisoning/exposure to oth autonomic<br>drug         | T94y.00 | Accidental poisoning by other corrosives and<br>caustics       |

|         |                                                              |         |                                                              |
|---------|--------------------------------------------------------------|---------|--------------------------------------------------------------|
| U1A0.12 | [X]Accidental poisoning with ibuprofen                       | U20Az00 | [X]Int self pois org solv,halogen hydrocarb, unspec place    |
| U408.00 | [X]Poison/exposure, ?intent, to other/unspec drug/medicament | ZV71600 | [V]Observation following other inflicted injury              |
| U48..00 | [X]Contact with steam hot vapours+objects undetermn intent   | T830z00 | Accidental poisoning- phenothiazine-based tranquilisers NOS  |
| T982100 | Accidental poisoning by exhaust gas from gas engine          | T924000 | Accidental poisoning by benzene                              |
| ZX15.00 | Throwing self onto floor                                     | ZVu0600 | [X]Examination & observat following other inflicted injury   |
| U24..00 | [X]Intent self harm by rifle shotgun/larger firearm disch    | TKx3.00 | Suicide and selfinflicted injury by extremes of cold         |
| T942.00 | Accidental poisoning by caustic alkalis                      | T964100 | Accidental poisoning by brass fumes                          |
| U202.00 | [X]Intent self poison/exposure to sedative hypnotic          | T960000 | Accidental poisoning by lead, unspecified                    |
| U20B.00 | [X]Intent self poison/exposure to other gas/vapour           | U40yz00 | [X]Pois/expos ?intent to unspecif chemical unspecif place    |
| TK21.00 | Suicide and selfinflicted poisoning by other carbon monoxide | T980200 | Accidental poisoning by propane                              |
| U1A5.11 | [X]Accidental poisoning with heroin                          | T983.00 | Accidental poisoning by carbon monoxide- other domestic fuel |
| U20y000 | [X]Int self poison/exposure to unspecif chemical at home     | U204100 | [X]Intent self poison psychotropic drug at res institut      |
| ZC15100 | Repeated self-induced vomiting                               | T964z00 | Accidental poisoning by metals + compounds and fumes NOS     |
| U202.13 | [X]Overdose - temazepam                                      | U1AA100 | [X]Acc poison/expos org solvent,halogen hydrocarb,res instit |
| T802000 | Accidental poisoning by codeine                              | ZX1Q.00 | Throwing self in front of train                              |
| T82z.00 | Accidental poisoning by sedatives and hypnotics NOS          | T851.00 | Accidental poisoning by oth central nervous syst depressants |
| T94..00 | Accidental poisoning by corrosives and caustics NEC          | T806200 | Accidental poisoning by naproxen                             |
| TK31.00 | Suicide + selfinflicted injury by suffocation by plastic bag | TK01100 | Suicide and self inflicted injury by Barbitone               |
| U1A4.13 | [X]Accidental poisoning with SSRI                            | T990.00 | Accidental poisoning by nitrogen oxides                      |
| T960.00 | Accidental poisoning by lead and its compounds and fumes     | T963000 | Accidental poisoning by arsenic, unspecified                 |
| U1AB700 | [X]Accident poison/exposure to other gas/vapour on farm      | 14K1.00 | Intentional overdose of prescription only medication         |
| T941.00 | Accidental poisoning by acids                                | U212.00 | [X]Inten slf harm hang strang/suffc sch oth ins/pub adm area |
| TN06.00 | Injury ?accidental, poisoning by corrosive/caustic substance | T802300 | Accidental poisoning by opium                                |
| U470.00 | [X]Exposure to smoke fire+flame undeterm intent occ at home  | U1AD200 | [X]Acc pois/expo to amphet - sch, other inst+pub admin area  |
| T981.00 | Accidental poisoning by other utility gas                    | T98y.00 | Accidental poisoning by carbon monoxide from other sources   |
| U4D..00 | [X]Crashing of motor vehicle, undetermined intent            | T802100 | Accidental poisoning by pethidine                            |
| U49z.00 | [X]Contact with sharp obj undeterm intent occ unspecif place | T983300 | Accidental poisoning by CO- kerosene in domestic stove/fire  |
| U42..00 | [X]Drowning and submersion, undetermined intent              | U4Bz.00 | [X]Fall jump/push frm high plce undt intnt occ unspecif plce |
| TK06.00 | Suicide + selfinflicted poisoning by agricultural chemical   | T850.12 | Accidental poisoning by anti-parkinsonism drug               |
| U40A.00 | [X]Pois/exposure,?intent,to organ                            | T98y100 | Accidental poisoning by CO - kiln vapour                     |

|         |                                                                                   |         |                                                               |
|---------|-----------------------------------------------------------------------------------|---------|---------------------------------------------------------------|
| U205000 | solvent,halogen hydrocarb<br>[X]Int self poison/exposure to narcotic drug at home | T830.00 | Accidental poisoning by phenothiazine-based tranquilisers     |
| U1A8000 | [X]Accident poison/exposure to other gas/vapour at home                           | U2By.00 | [X]Int self harm by jump from high place oth specif plce      |
| U29z.00 | [X]Intentional self harm by sharp object occ unspecif place                       | T941z00 | Accidental poisoning by acids NOS                             |
| U1A4100 | [X]Accid poison/expos to psychotropic drug at res institut                        | U1A2.16 | [X]Accidental poisoning with benzodiazepine                   |
| T832000 | Accidental poisoning by chlordiazepoxide                                          | T936z00 | Accidental poisoning by fungicides NOS                        |
| U291.00 | [X]Intent self harm by sharp object occ resident instit'n                         | TK5z.00 | Suicide and selfinflicted injury by firearms/explosives NOS   |
| U202.15 | [X]Overdose - nitrazepam                                                          | T930200 | Accidental poisoning by DDT                                   |
| U1A8000 | [X]Accident poison/exposure to oth/unsp drug/medicam home                         | U1A1000 | [X]Accident poison/exposure to antiepileptic at home          |
| U20B000 | [X]Int self poison/exposure to other gas/vapour at home                           | T811.00 | Accidental poisoning by barbitone                             |
| U1AC.00 | [X]Accident poisoning/exposure to pesticide                                       | T901z00 | Accidental poisoning by ethyl alcohol NOS                     |
| T882.00 | Accidental poisoning by drugs affecting blood constituents                        | U200400 | [X]Intent self pois nonopioid analgesic in street/highway     |
| T90y.00 | Accidental poisoning by other alcohols                                            | T923.00 | Accidental poisoning by petroleum solids                      |
| U201000 | [X]Int self poison/exposure to antiepileptic at home                              | TKx6.00 | Suicide and selfinflicted injury by crashing of aircraft      |
| ZX14.00 | Damaging own wounds                                                               | U2D6.00 | [X]Intent self harm crash motor vehic occ indust/constr area  |
| U2A3.00 | [X]Intent self harm by blunt object occ sports/athlet area                        | U4Az.00 | [X]Contact with blunt obj undeterm intent occ unspecif place  |
| T941200 | Accidental poisoning by sulphuric acid                                            | U40C000 | [X]Poison/exposure ?intent, to pesticide at home              |
| T937400 | Accidental poisoning by zinc phosphide                                            | T923z00 | Accidental poisoning by petrol solids NOS                     |
| U1A0.13 | [X]Accidental poisoning with aspirin                                              | U4B6.00 | [X]Fall jump/push frm high plce undt intrn indust/constr area |
| U1AA.00 | [X]Accid poison/exposure to organ solvent,halogen hydrocarb                       | U206000 | [X]Int self poison/exposure to hallucinogen at home           |
| T960z00 | Accidental poisoning by lead, NOS                                                 | U40y000 | [X]Poison/exposure ?intent, to unspecif chemical at home      |
| U210.00 | [X]Intent self harm by hanging strangulat/suffocat occ home                       | U220.00 | [X]Intent self harm by drowning/submersion occurrn at home    |
| T800.00 | Accidental poisoning by heroin                                                    | U1Ay700 | [X]Accident poison/exposure to unspecif chemical on farm      |
| T94z.00 | Accidental poisoning by corrosives and caustics NOS                               | U40yy00 | [X]Pois/exp ?intent to unspecif chemical other spec place     |
| U1A8.00 | [X]Accident poison/exposure to other/unspec drug/medicament                       | T941100 | Accidental poisoning by nitric acid                           |
| U20By00 | [X]Int self poison other gas/vapour other spec place                              | U1A9200 | [X]Acc poison/expos alcohol school/pub admin area             |
| T938100 | Accidental poisoning by methyl bromide                                            | ZX16300 | Gouging own rectum                                            |
| U1A4.12 | [X]Accidental poisoning with amitriptyline                                        | T830300 | Accidental poisoning by promazine                             |
| ZX1M.00 | Shooting self                                                                     | U216.00 | [X]Intent self harm by hang strangl/suffc indust/constr area  |
| U44..00 | [X]Rifle shotgun+larger firearm discharge undeterm intent                         | T887200 | Accidental poisoning by ophthalmological drugs                |
| T922.00 | Accidental poisoning by lubricating oils                                          | 1BDE.00 | Suicide risk increased from previous level                    |
| T964400 | Accidental poisoning by iron compounds                                            | ZX1R.11 | Jumping in front of vehicle                                   |
| T964300 | Accidental poisoning by copper salts                                              | U1A9300 | [X]Accid pois/expos alcohol in sport/athletic area            |

|         |                                                              |         |                                                              |
|---------|--------------------------------------------------------------|---------|--------------------------------------------------------------|
| T887100 | Accidental poisoning by mucous membrane drugs                | U1A9y00 | [X]Accid pois/expos to alcohol other spec place              |
| U202.11 | [X]Overdose - sleeping tabs                                  | TN02.00 | Injury ?accidental, poisoning by other sedative/hypnotic     |
| T90z.00 | Accidental poisoning by alcohol NOS                          | T806000 | Accidental poisoning by gold salts                           |
| T981300 | Accidental poisoning by heating gas NOS                      | T937100 | Accidental poisoning by squill and derivatives               |
| T801.00 | Accidental poisoning by methadone                            | T965z00 | Accidental poisoning by plant foods and fertilisers NOS      |
| T841100 | Accidental poisoning by lysergide, LSD                       | T823.00 | Accidental poisoning by methaqualone compounds               |
| T840100 | Accidental poisoning by imipramine                           | U1A8600 | [X]Acc pois/expos oth/unsp drug/medic indust/construct area  |
| U2B4.00 | [X]Intent self harm by jump from high place occ street/h'way | T966z00 | Accidental poisoning by glues and adhesives NOS              |
| TN2y.00 | Injury ?accidental, poisoning by other spec gas or vapour    | TK2y.00 | Suicide + selfinflicted poisoning by other gases and vapours |
| U4A0.00 | [X]Contact wth blunt object undetermined intent occ at home  | T832300 | Accidental poisoning by lorazepam                            |
| TK52.00 | Suicide and selfinflicted injury by hunting rifle            | T822.00 | Accidental poisoning by bromine compounds                    |
| U242.00 | [X]Int slf hrm rifl s'gun/lrg frarm dis sch/ins/pub adm area | T804.00 | Accidental poisoning by aromatic analgesics NEC              |
| U28..00 | [X]Intentional self harm by steam hot vapours / hot objects  | T80y000 | Accidental poisoning by pentazocine                          |
| U2D..00 | [X]Intentional self harm by crashing of motor vehicle        | U4A6.00 | [X]Contct wth blunt obj undet intent occ industr/constr area |
| ZX1H.00 | Self-asphyxiation                                            | U2y6.00 | [X]Intent self harm oth specif means occ indust/constr area  |
| T983000 | Accidental poisoning by CO- coal in domestic stove/fireplace | U200600 | [X]Int self pois nonopioid analgesic indust/construct area   |
| T87..00 | Accidental poisoning by anti-infectives                      | TN01300 | Injury ?accidental poisoning by Pentobarbitone               |
| T77z.00 | Accident/poisoning occurred in residential institution NOS   | U1A2z00 | [X]Accid poison/expos to sedative hypnotic unspecif place    |
| U20y.00 | [X]Intent self poison/exposure to unspecif chemical          | TK01z00 | Suicide and self inflicted injury by barbiturates            |
| T937.00 | Accidental poisoning by rodenticides                         | TKx0z00 | Suicide + selfinflicted inj-jump/lie before moving obj NOS   |
| T934z00 | Accidental poisoning by insecticides NOS                     | T805100 | Accidental poisoning by phenylbutazone                       |
| U1A4.00 | [X]Accident poisoning/exposure to psychotropic drug          | U1A4200 | [X]Acc poison/expos psychotropic drug school/pub admin area  |
| U1A4000 | [X]Accident poison/exposure to psychotropic drug at home     | U2Dz.00 | [X]Intent self harm by crash motor vehic occ unspecif place  |
| ZX1L200 | Self-mutilation of genitalia                                 | T804200 | Accidental poisoning by phenacetin                           |
| T855000 | Accidental poisoning by adrenalin                            | 1BDF.00 | Suicide risk unchanged from previous level                   |
| T99z.00 | Accidental poisoning by gases and vapours NOS                | U40By00 | [X]Pois/exp ?intent to other gas/vapour other spec place     |
| T982.00 | Accidental poisoning by motor vehicle exhaust gas            | T993.00 | Accidental poisoning by tear gas                             |
| ZX16200 | Gouging own eyes                                             | U1Ay100 | [X]Accid poison/expos to unspecif chemical at res institut   |
| T940000 | Accidental poisoning by carbolic acid                        | U2yy.00 | [X]Intent self harm oth specif means occ oth specif place    |

**PAIN**

**At least one ICD-9 in:**

|                                                                   |                                                                                                                                                                                                                                                                                                                                                                                                                             |
|-------------------------------------------------------------------|-----------------------------------------------------------------------------------------------------------------------------------------------------------------------------------------------------------------------------------------------------------------------------------------------------------------------------------------------------------------------------------------------------------------------------|
| Lumbar pain                                                       | 724                                                                                                                                                                                                                                                                                                                                                                                                                         |
| Back disorders                                                    | 721, 722, 723, 723, 737                                                                                                                                                                                                                                                                                                                                                                                                     |
| Neck and back problems                                            | 721.0, 721.1, 721.2, 721.3, 721.4, 721.5, 721.6, 721.7, 721.8, 721.9, 722.0, 722.1, 722.2, 722.3, 722.4, 722.5, 722.6, 722.7, 722.8, 722.9, 723.0, 723.1, 723.2, 723.3, 723.4, 723.5, 723.7, 723.8, 723.9, 724.0, 724.1, 724.2, 724.3, 724.4, 724.5, 724.6, 724.8, 724.9, 737.1, 737.2, 738.2, 738.4, 738.5, 739.1, 739.2, 739.3, 739.4, 756.1, 846.0, 846.1, 846.2, 846.3, 846.8, 846.9, 847.0, 847.1, 847.2, 847.3, 847.9 |
| Complex regional pain syndrome                                    | 337.2, 354.4, 355.7, 355.9                                                                                                                                                                                                                                                                                                                                                                                                  |
| Fibromyalgia                                                      | 729.1                                                                                                                                                                                                                                                                                                                                                                                                                       |
| Painful neuropathic disorders                                     | 250.6, 357.2, 053.1, 722.1, 722.2, 722.7, 724.0, 724.3, 724.4, 721.1, 722.0, 723.0, 723.4, 337.2, 353.2, 353.3, 353.4, 354.4, 355.7, 355.9, 729.2, 353.6, 350.1, 350.2, 352.1, 353.0, 353.1, 353.8, 353.9, 354.0, 354.1, 354.2, 354.3, 354.5, 354.8, 354.9, 355.0, 355.1, 355.2, 355.3, 355.4, 355.5, 355.6, 355.8,                                                                                                         |
| Pain                                                              | 338                                                                                                                                                                                                                                                                                                                                                                                                                         |
| Chronic pain                                                      | 338.2                                                                                                                                                                                                                                                                                                                                                                                                                       |
| Chronic pain associated with significant psychosocial dysfunction | 338.4                                                                                                                                                                                                                                                                                                                                                                                                                       |
| Pain disorders related to psychological factors                   | 307.8                                                                                                                                                                                                                                                                                                                                                                                                                       |
| Migraine and headache                                             | 346, 784, 339                                                                                                                                                                                                                                                                                                                                                                                                               |
| Osteoarthritis/Rheumatoid Arthritis                               | 714, 715                                                                                                                                                                                                                                                                                                                                                                                                                    |
| Irritable bowel syndrome                                          | 564.1                                                                                                                                                                                                                                                                                                                                                                                                                       |
| Lupus                                                             | 710.0                                                                                                                                                                                                                                                                                                                                                                                                                       |

OR

**At least one READ code in:**

|         |                                            |         |                                                 |
|---------|--------------------------------------------|---------|-------------------------------------------------|
| N131.00 | cervicalgia - pain in neck                 | N05..00 | osteoarthritis and allied disorders             |
| 1B1G.00 | headache                                   | N217700 | calcaneal spur                                  |
| 1BA5.00 | frontal headache                           | N23y400 | spasm of muscle                                 |
| F26..00 | migraine                                   | F260.00 | classical migraine                              |
| E278100 | tension headache                           | N224.00 | ganglion and cyst of synovium, tendon and bursa |
| N143.00 | sciatica                                   | N081000 | loose body in joint, unspecified joint          |
| N216500 | prepatellar bursitis                       | PG17.00 | spina bifida occulta                            |
| J521.11 | irritable bowel syndrome                   | 1BA8.00 | temporal headache                               |
| N090.00 | effusion of joint                          | N140.11 | spinal stenosis                                 |
| N213300 | olecranon bursitis                         | N235.00 | hypermobility syndrome                          |
| N145.00 | backache, unspecified                      | N37..00 | curvature of spine                              |
| N12..00 | intervertebral disc disorders              | N225100 | rupture of popliteal space synovial cyst        |
| N217900 | plantar fasciitis                          | F26y000 | hemiplegic migraine                             |
| F340.00 | carpal tunnel syndrome                     | 1B1G000 | sinus headache                                  |
| N040.00 | rheumatoid arthritis                       | N066.00 | unspecified monoarthritis                       |
| J521.00 | irritable colon - irritable bowel syndrome | 7H48211 | release of trigger finger                       |
| N224A00 | synovial cyst of popliteal space           | N01w.00 | reactive arthropathy, unspecified               |
| N371.00 | acquired kyphosis                          | F330.00 | brachial plexus lesions                         |
| N21z300 | exostosis of unspecified site              | N224000 | synovial cyst unspecified                       |
| N221.00 | bunion                                     | N043.00 | juvenile rheumatoid arthritis - still's         |

|         |                                      |         |                                                |
|---------|--------------------------------------|---------|------------------------------------------------|
| R040.00 | [d]headache                          | SC20z12 | disease                                        |
| N220.00 | synovitis and tenosynovitis          | F355.00 | headache - post traumatic                      |
| N20..00 | polymyalgia rheumatica               | N224200 | tarsal tunnel syndrome                         |
| F301.00 | other specified trigeminal neuralgia | N083.00 | ganglion of tendon sheath                      |
| N142.14 | lumbago                              | N245.00 | recurrent dislocation of joint                 |
| 1BA6.00 | occipital headache                   | N21..00 | pain in limb                                   |
|         |                                      |         | peripheral enthesopathies and allied syndromes |
| N372.00 | acquired lordosis                    | PG16.00 | klippel-feil syndrome                          |
| PG12.00 | congenital spondylolisthesis         | N213200 | lateral epicondylitis of the elbow             |
| N11..00 | spondylosis and allied disorders     | N221000 | infected bunion                                |
| N244.00 | fasciitis unspecified                | N141.00 | pain in thoracic spine                         |
| N220300 | trigger finger - acquired            | 1BB4.00 | morning headache                               |
| F261.00 | common migraine                      | F262200 | abdominal migraine                             |
| F262000 | cluster headache                     | N110.00 | cervical spondylosis without myelopathy        |
| N370.00 | adolescent postural kyphosis         | N384.00 | acquired spondylolisthesis                     |
| N07..00 | internal derangement of knee         | 7K51111 | bunionectomy                                   |
| N234.00 | laxity of ligament                   |         |                                                |
